# Supplementary material for: Genome expansion of an obligate parthenogenesis-associated Wolbachia poses an exception to the symbiont reduction model
Source: BMC Genomics. 2019 Feb 6;20:106. doi: 10.1186/s12864-019-5492-9 (PMC6364476; doi:10.1186/s12864-019-5492-9)
Supplement: Supplementary file 4 — Results OrthoFinder analysis. This file contains multiple sheets with selected orthogroups derived from the Orthofinder analysis as well as the z-scores. (XLSX 1245 kb) [file 12864_2019_5492_MOESM4_ESM.xlsx]

## Sheet: Overall statistics
Orthofinder overall statistics
Number of genes	19303
Number of genes in orthogroups	18480
Number of unassigned genes	823
Percentage of genes in orthogroups	95.7
Percentage of unassigned genes	4.3
Number of orthogroups	1239
Number of species-specific orthogroups	4
Number of genes in species-specific orthogroups	16
Percentage of genes in species-specific orthogroups	0.1
Mean orthogroup size	14.9
Median orthogroup size	17
G50 (assigned genes)	18
G50 (all genes)	18
O50 (assigned genes)	425
O50 (all genes)	448
Number of orthogroups with all species present	460
Number of single-copy orthogroups	414
Date	2017-06-07
Orthogroups file	Orthogroups.csv
Unassigned genes file	Orthogroups_UnassignedGenes.csv
Per-species statistics	Statistics_PerSpecies.csv
Overall statistics	Statistics_Overall.csv
Orthogroups shared between species	Orthogroups_SpeciesOverlaps.csv
Average number of genes per-species in orthogroup	Number of orthogroups	Percentage of orthogroups	Number of genes	Percentage of genes
<1	678	54.7	6778	36.7
'1	545	44	10295	55.7
'2	10	0.8	452	2.4
'3	3	0.2	203	1.1
'4	0	0	0	0
'5	0	0	0	0
'6	0	0	0	0
'7	1	0.1	126	0.7
'8	0	0	0	0
'9	0	0	0	0
'10	0	0	0	0
11-15	1	0.1	272	1.5
16-20	1	0.1	354	1.9
21-50	0	0	0	0
51-100	0	0	0	0
101-150	0	0	0	0
151-200	0	0	0	0
201-500	0	0	0	0
501-1000	0	0	0	0
'1001+	0	0	0	0
Number of species in orthogroup	Number of orthogroups
1	4
2	137
3	45
4	49
5	32
6	38
7	25
8	33
9	34
10	28
11	35
12	32
13	32
14	33
15	51
16	60
17	111
18	460

## Sheet: All orthogroups
Genes in all Orthogroups																				Number of genes per orthogroup per strain																				Average number of genes per orthogroup			Z-scores per orthogroup per strain
Strain	wOo	wOv	wBm	wCle	wAu	wMel	wHa	wRi	wNo	wPip_Pel	wRec	wBol1-b	wVulC	wFol	wTpre	wLcla	wUni	wPpe	,	Strain	wOo	wOv	wBm	wCle	wAu	wMel	wHa	wRi	wNo	wPip_Pel	wRec	wBol1-b	wVulC	wFol	wTpre	wLcla	wUni	wPpe					Strain	wOo	wOv	wBm	wCle	wAu	wMel
Phenotype	dev	dev	dev	dev/vitB	viral pro	CI/viral pro	CI	CI	CI	CI	CI/MK	MK/CI res	F	PI	PI	PI	PI	?		Phenotype	dev	dev	dev	dev/vitB	viral pro	CI/viral pro	CI	CI	CI	CI	CI/MK	MK/CI res	F	PI	PI	PI	PI	?					Phenotype	dev	dev	dev	dev/vitB	viral pro	CI/viral pro
Supergroup	C	C	D	F	A	A	A	A	B	B	A	B	B	E	B	B	A	L		Supergroup	C	C	D	F	A	A	A	A	B	B	A	B	B	E	B	B	A	L			S.D.		Supergroup	C	C	D	F	A	A
OG0000000				BAO99331.1 putative transposase [Wolbachia endosymbiont of Cimex lectularius], BAO99332.1 putative transposase [Wolbachia endosymbiont of Cimex lectularius], BAO99339.1 putative transposase [Wolbachia endosymbiont of Cimex lectularius], BAO99340.1 putative transposase [Wolbachia endosymbiont of Cimex lectularius], BAO99362.1 putative transposase [Wolbachia endosymbiont of Cimex lectularius], BAO9…	CDR78494.1 IS5 family transposase OrfA_Transposase and inactivated derivatives [Wolbachia], CDR78495.1 IS5 family transposase OrfB_Transposase DDE domain [Wolbachia], CDR78639.1 IS5 family transposase OrfB_Transposase DDE domain [Wolbachia], CDR78640.1 IS5 family transposase OrfA_Transposase and inactivated derivatives [Wolbachia], CDR78650.1 IS5 family transposase OrfB_Transposase DDE domain [Wo…	AAS13810.1 transposase_ IS5 family_ OrfB [Wolbachia endosymbiont of Drosophila melanogaster], AAS13811.1 transposase_ IS5 family_ OrfA [Wolbachia endosymbiont of Drosophila melanogaster], AAS13891.1 transposase_ IS5 family_ OrfA [Wolbachia endosymbiont of Drosophila melanogaster], AAS13892.1 transposase_ IS5 family_ OrfB [Wolbachia endosymbiont of Drosophila melanogaster], AAS13960.1 transposase_…		ACN94917.1 transposase_ IS5 family [Wolbachia sp. wRi], ACN94931.1 transposase_ IS5 family [Wolbachia sp. wRi], ACN95163.1 transposase [Wolbachia sp. wRi], ACN95167.1 transposase [Wolbachia sp. wRi], ACN95202.1 transposase_ IS5 family [Wolbachia sp. wRi], ACN95203.1 transposase_ IS5 family [Wolbachia sp. wRi], ACN95320.1 transposase [Wolbachia sp. wRi], ACN95440.1 transposase_ IS5 family [Wolbach…	AGJ98629.1 Putative transposase [Wolbachia endosymbiont of Drosophila simulans wNo], AGJ98704.1 hypothetical protein wNo_02690 [Wolbachia endosymbiont of Drosophila simulans wNo]		WP_006279811.1 MULTISPECIES_ transposase [Wolbachia], WP_007548311.1 MULTISPECIES_ transposase [Wolbachia], WP_007548435.1 MULTISPECIES_ transposase [Proteobacteria], WP_038198565.1 transposase_ partial [Wolbachia pipientis], WP_038198645.1 MULTISPECIES_ transposase [Wolbachia], WP_038198700.1 transposase [Wolbachia pipientis], WP_038198887.1 transposase [Wolbachia pipientis], WP_038199499.1 tran…	WP_007301963.1 MULTISPECIES_ transposase [Wolbachia], WP_019236593.1 hypothetical protein [Wolbachia pipientis], WP_019236650.1 MULTISPECIES_ hypothetical protein [Wolbachia]	WP_047758662.1 transposase [Wolbachia endosymbiont of Armadillidium vulgare], WP_047759539.1 hypothetical protein [Wolbachia endosymbiont of Armadillidium vulgare], WP_047759540.1 hypothetical protein [Wolbachia endosymbiont of Armadillidium vulgare]	wFol_00760 wFol_00760 Transposase_ IS5 family 102065_102814 reverse MW_28953, wFol_02600 wFol_02600 Transposase_ IS5 family 306562_307311 forward MW_28953, wFol_06950 wFol_06950 Transposase_ IS5 family 825224_825973 forward MW_28953, wFol_09610 wFol_09610 Transposase_ IS5 family 1142084_1142833 reverse MW_28953, wFol_10630 wFol_10630 Transposase_ IS5 family 1262251_1263000 forward MW_28953, wFol_…	OCA05705.1 transposase_ IS5 family [Wolbachia endosymbiont of Trichogramma pretiosum], OCA05707.1 hypothetical protein wTpre_26 [Wolbachia endosymbiont of Trichogramma pretiosum], OCA07029.1 hypothetical protein wTpre_1384 [Wolbachia endosymbiont of Trichogramma pretiosum], OCA07031.1 transposase_ IS5 family [Wolbachia endosymbiont of Trichogramma pretiosum]	wLcla00060 wLcla00060 Transposase_ IS5 family_ OrfB 2481_2801 reverse MW_11452, wLcla00070 wLcla00070 Transposase_ IS5 family_ OrfA 2802_3125 reverse MW_13319, wLcla11340 wLcla11340 Uncharacterized protein 1047481_1047786 reverse MW_11552	ONI56074.1 transposase domain protein [Wolbachia pipientis wUni], ONI56075.1 hypothetical protein N500_0846 [Wolbachia pipientis wUni], ONI56128.1 putative transposase [Wolbachia pipientis wUni], ONI56418.1 transposase [Wolbachia pipientis wUni], ONI56419.1 hypothetical protein N500_0508 [Wolbachia pipientis wUni], ONI56420.1 putative transposase [Wolbachia pipientis wUni], ONI56499.1 transposase…	OEY86444.1 hypothetical protein BIY23_03955 [Wolbachia pipientis], OEY86497.1 hypothetical protein BIY23_03670 [Wolbachia pipientis], OEY87047.1 hypothetical protein BIY23_00980 [Wolbachia pipientis], OEY87184.1 hypothetical protein BIY23_00200 [Wolbachia pipientis]		OG0000000	0	0	0	233	27	27	0	21	2	0	8	3	3	6	4	3	13	4		19.6667	53.9924		OG0000000	-0.364249	-0.364249	-0.364249	3.95118	0.135822	0.135822
OG0000001			gi|58584417|ref|YP_197990.1| hypothetical protein Wbm0157 [Wolbachia endosymbiont strain TRS of Brugia malayi], gi|58584545|ref|YP_198118.1| Ankyrin repeat-containing protein [Wolbachia endosymbiont strain TRS of Brugia malayi], gi|58584554|ref|YP_198127.1| Ankyrin repeat-containing protein [Wolbachia endosymbiont strain TRS of Brugia malayi], gi|58584651|ref|YP_198224.1| Ankyrin repeat-containin…	BAO99457.1 ankyrin repeat-containing protein [Wolbachia endosymbiont of Cimex lectularius], BAO99458.1 ankyrin repeat-containing protein [Wolbachia endosymbiont of Cimex lectularius], BAO99459.1 ankyrin repeat-containing protein [Wolbachia endosymbiont of Cimex lectularius], BAO99578.1 ankyrin repeat-containing protein [Wolbachia endosymbiont of Cimex lectularius], BAO99583.1 ankyrin repeat domai…	CDR78658.1 ankyrin repeat-containing protein_Ribulose-5-phosphate 4-epimerase and related epimerases and aldolases_Ankyrin repeats _3 copies_ [Wolbachia], CDR78705.1 ankyrin repeat domain protein_Ribulose-5-phosphate 4-epimerase and related epimerases and aldolases_transient-receptor-potential calcium channel protein_Ankyrin repeat [Wolbachia], CDR78706.1 ankyrin repeat-containing prophage Lambda…	AAS14021.1 prophage LambdaW1_ ankyrin repeat domain protein [Wolbachia endosymbiont of Drosophila melanogaster], AAS14022.1 prophage LambdaW1_ ankyrin repeat domain protein [Wolbachia endosymbiont of Drosophila melanogaster], AAS14027.1 prophage LambdaW1_ ankyrin repeat domain protein [Wolbachia endosymbiont of Drosophila melanogaster], AAS14111.1 ankyrin repeat domain protein [Wolbachia endosymb…	AGJ99683.1 Ankyrin repeat domain protein [Wolbachia endosymbiont of Drosophila simulans wHa], AGJ99705.1 Ankyrin repeat domain protein [Wolbachia endosymbiont of Drosophila simulans wHa], AGJ99733.1 Ankyrin repeat domain protein [Wolbachia endosymbiont of Drosophila simulans wHa], AGJ99734.1 Ankyrin repeat domain protein [Wolbachia endosymbiont of Drosophila simulans wHa], AGJ99738.1 Ankyrin repe…	ACN95321.1 ankyrin repeat domain protein [Wolbachia sp. wRi], ACN95322.1 ankyrin repeat domain protein [Wolbachia sp. wRi], ACN95383.1 ankyrin repeat domain protein [Wolbachia sp. wRi], ACN95433.1 Ankyrin repeat domain protein [Wolbachia sp. wRi], ACN95434.1 Ankyrin repeat domain protein [Wolbachia sp. wRi], ACN95439.1 ankyrin repeat domain protein [Wolbachia sp. wRi], ACN95442.1 ankyrin repeat d…	AGJ98555.1 Ankyrin repeat domain protein [Wolbachia endosymbiont of Drosophila simulans wNo], AGJ98556.1 Ankyrin repeat domain protein [Wolbachia endosymbiont of Drosophila simulans wNo], AGJ98611.1 Ankyrin repeat domain protein [Wolbachia endosymbiont of Drosophila simulans wNo], AGJ98776.1 Ankyrin repeat domain protein [Wolbachia endosymbiont of Drosophila simulans wNo], AGJ98851.1 Ankyrin repe…	CAQ54407.1 Ankyrin repeat domain protein [Wolbachia endosymbiont of Culex quinquefasciatus Pel], CAQ54408.1 ankyrin repeat domain protein [Wolbachia endosymbiont of Culex quinquefasciatus Pel], CAQ54447.1 ankyrin repeat domain protein [Wolbachia endosymbiont of Culex quinquefasciatus Pel], CAQ54448.1 Ankyrin repeat domain protein [Wolbachia endosymbiont of Culex quinquefasciatus Pel], CAQ54518.1 …	WP_038198593.1 ankryin [Wolbachia pipientis], WP_038198698.1 hypothetical protein [Wolbachia pipientis], WP_038199221.1 hypothetical protein [Wolbachia pipientis], WP_051955823.1 ankryin [Wolbachia pipientis], WP_051955867.1 hypothetical protein [Wolbachia pipientis], WP_051955871.1 hypothetical protein [Wolbachia pipientis]	WP_007301945.1 MULTISPECIES_ hypothetical protein [Wolbachia], WP_007302070.1 MULTISPECIES_ hypothetical protein [Wolbachia], WP_007302399.1 MULTISPECIES_ hypothetical protein [Wolbachia], WP_007302582.1 MULTISPECIES_ hypothetical protein [Wolbachia], WP_019236388.1 hypothetical protein [Wolbachia pipientis], WP_019236389.1 hypothetical protein [Wolbachia pipientis], WP_019236409.1 hypothetical p…	WP_047758667.1 ankyrin [Wolbachia endosymbiont of Armadillidium vulgare], WP_047758991.1 hypothetical protein [Wolbachia endosymbiont of Armadillidium vulgare], WP_047758992.1 hypothetical protein [Wolbachia endosymbiont of Armadillidium vulgare], WP_047759055.1 hypothetical protein_ partial [Wolbachia endosymbiont of Armadillidium vulgare], WP_047759063.1 ankryin_ partial [Wolbachia endosymbiont…	wFol_00030 wFol_00030 Ankyrin repeat domain protein 4327_5667 forward MW_50244, wFol_01970 wFol_01970 Ankyrin repeat domain protein 224189_225547 forward MW_50854, wFol_01980 wFol_01980 Ankyrin repeat domain protein 225797_227014 forward MW_46234, wFol_02610 wFol_02610 Ankyrin repeat domain protein 307289_308956 forward MW_61611, wFol_02650 wFol_02650 Ankyrin repeat domain protein 311254_313137 r…	OCA05739.1 ankyrin repeat family protein [Wolbachia endosymbiont of Trichogramma pretiosum], OCA05838.1 ankyrin repeat family protein [Wolbachia endosymbiont of Trichogramma pretiosum], OCA05840.1 ankyrin repeat family protein [Wolbachia endosymbiont of Trichogramma pretiosum], OCA05841.1 hypothetical protein wTpre_159 [Wolbachia endosymbiont of Trichogramma pretiosum], OCA05864.1 ankyrin repeat …	wLcla00830 wLcla00830 Ankyrin repeat domain protein 63418_64329 reverse MW_33502, wLcla00970 ank2 Ankyrin repeat domain protein 77459_78163 reverse MW_25147, wLcla03980 wLcla03980 Uncharacterized protein 341685_342416 reverse MW_26658, wLcla06930 wLcla06930 Peptidase MA and ankyrin repeat domain protein 638066_641539 forward MW_131215, wLcla07410 wLcla07410 Ankyrin repeat domain protein 683632_68…	ONI55993.1 ankyrin repeat family protein [Wolbachia pipientis wUni], ONI56101.1 ankyrin repeat family protein [Wolbachia pipientis wUni], ONI56311.1 ankyrin repeat family protein [Wolbachia pipientis wUni], ONI56459.1 ankyrin repeat domain protein [Wolbachia pipientis wUni], ONI56480.1 ankyrin repeat family protein [Wolbachia pipientis wUni]	OEY86457.1 hypothetical protein BIY23_04045 [Wolbachia pipientis], OEY86541.1 hypothetical protein BIY23_03175 [Wolbachia pipientis], OEY86603.1 hypothetical protein BIY23_02750 [Wolbachia pipientis], OEY86687.1 hypothetical protein BIY23_02385 [Wolbachia pipientis], OEY86820.1 hypothetical protein BIY23_02200 [Wolbachia pipientis], OEY86865.1 hypothetical protein BIY23_04535 [Wolbachia pipientis…		OG0000001	0	0	5	31	17	11	15	11	11	15	6	17	31	56	18	6	5	17		15.1111	13.4466		OG0000001	-1.12379	-1.12379	-0.751947	1.18163	0.140474	-0.305737
OG0000002			gi|58584323|ref|YP_197896.1| hypothetical protein Wbm0062 [Wolbachia endosymbiont strain TRS of Brugia malayi], gi|58584631|ref|YP_198204.1| hypothetical protein Wbm0374 [Wolbachia endosymbiont strain TRS of Brugia malayi]	BAO99374.1 putative uncharacterized protein [Wolbachia endosymbiont of Cimex lectularius], BAO99383.1 putative transposase [Wolbachia endosymbiont of Cimex lectularius], BAO99396.1 putative uncharacterized protein [Wolbachia endosymbiont of Cimex lectularius], BAO99616.1 putative uncharacterized protein [Wolbachia endosymbiont of Cimex lectularius], BAO99683.1 putative uncharacterized protein [Wo…	CDR78436.1 conserved hypothetical protein [Wolbachia], CDR78439.1 conserved hypothetical protein_PD-_D/E_XK nuclease family transposase [Wolbachia], CDR78457.1 conserved hypothetical protein [Wolbachia], CDR78643.1 Putative transcriptional regulator_conserved hypothetical protein_PD-_D/E_XK nuclease family transposase [Wolbachia], CDR78716.1 Putative transcriptional regulator_conserved hypothetic…	AAS13808.1 conserved hypothetical protein [Wolbachia endosymbiont of Drosophila melanogaster], AAS13812.1 conserved domain protein [Wolbachia endosymbiont of Drosophila melanogaster], AAS13929.1 conserved domain protein [Wolbachia endosymbiont of Drosophila melanogaster], AAS13970.1 conserved hypothetical protein [Wolbachia endosymbiont of Drosophila melanogaster], AAS14032.1 conserved hypothetic…	AGJ99587.1 hypothetical protein wHa_00930 [Wolbachia endosymbiont of Drosophila simulans wHa], AGJ99589.1 hypothetical protein wHa_00950 [Wolbachia endosymbiont of Drosophila simulans wHa], AGJ99605.1 Putative transposase [Wolbachia endosymbiont of Drosophila simulans wHa], AGJ99665.1 hypothetical protein wHa_01830 [Wolbachia endosymbiont of Drosophila simulans wHa], AGJ99708.1 Putative transposa…	ACN94906.1 hypothetical protein WRi_000370 [Wolbachia sp. wRi], ACN94932.1 hypothetical protein WRi_000770 [Wolbachia sp. wRi], ACN94981.1 hypothetical protein WRi_001300 [Wolbachia sp. wRi], ACN94984.1 hypothetical protein WRi_001330 [Wolbachia sp. wRi], ACN95046.1 hypothetical protein WRi_002150 [Wolbachia sp. wRi], ACN95160.1 hypothetical protein WRi_003500 [Wolbachia sp. wRi], ACN95162.1 hypo…	AGJ99122.1 Putative transposase [Wolbachia endosymbiont of Drosophila simulans wNo], AGJ99433.1 Putative transposase [Wolbachia endosymbiont of Drosophila simulans wNo]	CAQ54348.1 conserved hypothetical protein [Wolbachia endosymbiont of Culex quinquefasciatus Pel], CAQ54399.1 conserved hypothetical protein [Wolbachia endosymbiont of Culex quinquefasciatus Pel], CAQ54569.1 hypothetical protein WP0461 [Wolbachia endosymbiont of Culex quinquefasciatus Pel], CAQ55081.1 hypothetical protein WP0973 [Wolbachia endosymbiont of Culex quinquefasciatus Pel], CAQ55452.1 co…	WP_015589128.1 MULTISPECIES_ transposase [Wolbachia], WP_038198532.1 hypothetical protein [Wolbachia pipientis], WP_038198913.1 transposase [Wolbachia pipientis], WP_038199202.1 hypothetical protein [Wolbachia pipientis], WP_038199268.1 hypothetical protein [Wolbachia pipientis], WP_038199697.1 hypothetical protein [Wolbachia pipientis], WP_038199741.1 hypothetical protein [Wolbachia pipientis], …	WP_019236470.1 transposase [Wolbachia pipientis], WP_019236486.1 transposase [Wolbachia pipientis], WP_019236550.1 transposase [Wolbachia pipientis], WP_019236577.1 transposase [Wolbachia pipientis], WP_019236979.1 hypothetical protein [Wolbachia pipientis]	WP_047759081.1 transposase_ partial [Wolbachia endosymbiont of Armadillidium vulgare], WP_047759107.1 hypothetical protein [Wolbachia endosymbiont of Armadillidium vulgare], WP_047759108.1 transposase [Wolbachia endosymbiont of Armadillidium vulgare], WP_047759670.1 transposase [Wolbachia endosymbiont of Armadillidium vulgare], WP_047759834.1 transposase [Wolbachia endosymbiont of Armadillidium v…	wFol_01640 wFol_01640 Transposase_ PD-_D/E_XK nuclease family 190093_190950 reverse MW_33114, wFol_03020 wFol_03020 Transposase_ PD-_D/E_XK nuclease family 360787_361674 forward MW_34477, wFol_03140 wFol_03140 Transposase_ PD-_D/E_XK nuclease family 374928_375839 reverse MW_35130, wFol_05360 wFol_05360 Transposase_ PD-_D/E_XK nuclease family 650772_651683 reverse MW_35079, wFol_07300 wFol_07300 T…	OCA06512.1 hypothetical protein wTpre_847 [Wolbachia endosymbiont of Trichogramma pretiosum]		ONI55984.1 hypothetical protein N500_0940 [Wolbachia pipientis wUni], ONI56338.1 hypothetical protein N500_0580 [Wolbachia pipientis wUni], ONI56441.1 putative transposase [Wolbachia pipientis wUni], ONI56442.1 hypothetical protein N500_0473 [Wolbachia pipientis wUni], ONI56470.1 hypothetical protein N500_0448 [Wolbachia pipientis wUni], ONI56516.1 hypothetical protein N500_0411 [Wolbachia pipien…	OEY86535.1 hypothetical protein BIY23_03145 [Wolbachia pipientis], OEY86818.1 hypothetical protein BIY23_02190 [Wolbachia pipientis], OEY86894.1 hypothetical protein BIY23_00060 [Wolbachia pipientis]		OG0000002	0	0	2	12	11	17	13	21	2	5	8	5	7	11	1	0	8	3		7	6.17395		OG0000002	-1.1338	-1.1338	-0.809854	0.809854	0.647884	1.61971
OG0000003			gi|58584445|ref|YP_198018.1| hypothetical protein Wbm0185 [Wolbachia endosymbiont strain TRS of Brugia malayi]	BAP00100.1 putative transcriptional regulator [Wolbachia endosymbiont of Cimex lectularius]	CDR78644.1 transcriptional regulator_anaerobic benzoate catabolism transcriptional regulator_Predicted transcriptional regulator_transcriptional regulator_ y4mF family_Helix-turn-helix [Wolbachia], CDR78647.1 transcriptional regulator_anaerobic benzoate catabolism transcriptional regulator_Predicted transcriptional regulator_transcriptional regulator_ y4mF family_Helix-turn-helix [Wolbachia], CDR…	AAS13996.1 transcriptional regulator_ putative [Wolbachia endosymbiont of Drosophila melanogaster], AAS13997.1 transcriptional regulator_ putative [Wolbachia endosymbiont of Drosophila melanogaster], AAS14223.1 transcriptional regulator_ putative [Wolbachia endosymbiont of Drosophila melanogaster], AAS14270.1 hypothetical protein WD_0564 [Wolbachia endosymbiont of Drosophila melanogaster], AAS143…	AGJ99709.1 Putative transcriptional regulator [Wolbachia endosymbiont of Drosophila simulans wHa], AGJ99747.1 Putative transcriptional regulator [Wolbachia endosymbiont of Drosophila simulans wHa], AGJ99749.1 Putative transcriptional regulator [Wolbachia endosymbiont of Drosophila simulans wHa], AGJ99851.1 Putative transcriptional regulator [Wolbachia endosymbiont of Drosophila simulans wHa], AGJ…	ACN95361.1 transcriptional regulator_ putative [Wolbachia sp. wRi], ACN95362.1 transcriptional regulator_ putative [Wolbachia sp. wRi], ACN95365.1 transcriptional regulator_ putative [Wolbachia sp. wRi], ACN95755.1 transcriptional regulator_ putative [Wolbachia sp. wRi], ACN95756.1 transcriptional regulator_ putative [Wolbachia sp. wRi], ACN95759.1 transcriptional regulator_ putative [Wolbachia s…	AGJ98652.1 Putative transcriptional regulator [Wolbachia endosymbiont of Drosophila simulans wNo], AGJ98930.1 Transcriptional regulator [Wolbachia endosymbiont of Drosophila simulans wNo], AGJ98931.1 Transcriptional regulator [Wolbachia endosymbiont of Drosophila simulans wNo], AGJ98934.1 Transcriptional regulator [Wolbachia endosymbiont of Drosophila simulans wNo], AGJ99406.1 Putative transcript…	CAQ54347.1 Putative transcriptional regulator [Wolbachia endosymbiont of Culex quinquefasciatus Pel], CAQ54381.1 Putative transcriptional regulator [Wolbachia endosymbiont of Culex quinquefasciatus Pel], CAQ54382.1 Putative transcriptional regulator [Wolbachia endosymbiont of Culex quinquefasciatus Pel], CAQ54385.1 Putative transcriptional regulator [Wolbachia endosymbiont of Culex quinquefasciat…	WP_038198911.1 transcriptional regulator [Wolbachia pipientis]	WP_019236456.1 transcriptional regulator [Wolbachia pipientis], WP_019236551.1 transcriptional regulator [Wolbachia pipientis], WP_019236580.1 transcriptional regulator [Wolbachia pipientis], WP_019236581.1 transcriptional regulator [Wolbachia pipientis], WP_019236971.1 transcriptional regulator_ partial [Wolbachia pipientis], WP_019236991.1 transcriptional regulator_ partial [Wolbachia pipientis…	WP_047759109.1 XRE family transcriptional regulator [Wolbachia endosymbiont of Armadillidium vulgare], WP_047759110.1 transcriptional regulator [Wolbachia endosymbiont of Armadillidium vulgare], WP_047759677.1 transcriptional regulator [Wolbachia endosymbiont of Armadillidium vulgare], WP_047759680.1 transcriptional regulator [Wolbachia endosymbiont of Armadillidium vulgare]	wFol_02640 wFol_02640 Putative phage repressor protein 310470_310820 reverse MW_13270, wFol_02680 wFol_02680 Putative phage repressor protein 315737_316135 reverse MW_15131, wFol_02690 wFol_02690 Putative phage repressor protein 316192_316530 reverse MW_12896, wFol_03070 wFol_03070 Putative phage repressor protein 367380_367730 forward MW_13180, wFol_05280 wFol_05280 Putative phage repressor prot…	OCA05814.1 hypothetical protein wTpre_133 [Wolbachia endosymbiont of Trichogramma pretiosum], OCA06994.1 helix-turn-helix family protein [Wolbachia endosymbiont of Trichogramma pretiosum], OCA07051.1 hypothetical protein wTpre_1407 [Wolbachia endosymbiont of Trichogramma pretiosum], OCA07052.1 putative transcriptional regulator [Wolbachia endosymbiont of Trichogramma pretiosum], OCA07053.1 putati…			OEY86830.1 hypothetical protein BIY23_02005 [Wolbachia pipientis]		OG0000003	0	0	1	1	8	7	5	6	5	7	1	7	4	10	8	0	0	1		3.94444	3.43806		OG0000003	-1.14729	-1.14729	-0.856426	-0.856426	1.17961	0.888744
OG0000004				BAO99700.1 putative transposase [Wolbachia endosymbiont of Cimex lectularius]	CDR78743.1 transposase_Transposase IS116/IS110/IS902 family [Wolbachia], CDR78753.1 transposase_Transposase IS116/IS110/IS902 family [Wolbachia], CDR78754.1 prophage LambdaW1_ IS110 family transposase [Wolbachia], CDR79028.1 prophage LambdaW1_ IS110 family transposase_Transposase IS116/IS110/IS902 family [Wolbachia], CDR79323.1 transposase_Transposase IS116/IS110/IS902 family [Wolbachia], CDR7932…	AAS14013.1 prophage LambdaW1_ transposase_ IS110 family [Wolbachia endosymbiont of Drosophila melanogaster]		ACN94963.1 transposase [Wolbachia sp. wRi], ACN95082.1 transposase [Wolbachia sp. wRi], ACN95089.1 transposase [Wolbachia sp. wRi], ACN95192.1 transposase [Wolbachia sp. wRi], ACN95204.1 transposase [Wolbachia sp. wRi], ACN95243.1 transposase [Wolbachia sp. wRi], ACN95249.1 transposase [Wolbachia sp. wRi], ACN95368.1 transposase [Wolbachia sp. wRi], ACN95371.1 transposase [Wolbachia sp. wRi], ACN…	AGJ98654.1 Transposase [Wolbachia endosymbiont of Drosophila simulans wNo], AGJ98936.1 Transposase [Wolbachia endosymbiont of Drosophila simulans wNo], AGJ99120.1 Transposase [Wolbachia endosymbiont of Drosophila simulans wNo]		WP_038198578.1 transposase [Wolbachia pipientis], WP_049973639.1 MULTISPECIES_ hypothetical protein [Wolbachia], WP_051955848.1 hypothetical protein [Wolbachia pipientis], WP_051955850.1 hypothetical protein [Wolbachia pipientis]	WP_019236996.1 hypothetical protein_ partial [Wolbachia pipientis]	WP_047758974.1 hypothetical protein [Wolbachia endosymbiont of Armadillidium vulgare], WP_047759204.1 hypothetical protein [Wolbachia endosymbiont of Armadillidium vulgare], WP_047759358.1 transposase [Wolbachia endosymbiont of Armadillidium vulgare], WP_047759597.1 hypothetical protein [Wolbachia endosymbiont of Armadillidium vulgare], WP_047759815.1 hypothetical protein [Wolbachia endosymbiont …	wFol_00620 wFol_00620 Transposase_ IS110 family 85045_85617 forward MW_21806, wFol_00630 wFol_00630 Transposase_ IS110 family 85623_86012 forward MW_14233, wFol_01120 wFol_01120 Transposase_ IS110 family 150269_150658 reverse MW_14237, wFol_01130 wFol_01130 Transposase_ IS110 family 150664_151236 reverse MW_21805, wFol_01700 wFol_01700 Transposase_ IS110 family 198347_198877 reverse MW_19773, wFo…	OCA06137.1 hypothetical protein wTpre_460 [Wolbachia endosymbiont of Trichogramma pretiosum]	wLcla04140 wLcla04140 Transposase_ IS110 family 357594_357974 forward MW_14022	ONI55763.1 hypothetical protein N500_1183 [Wolbachia pipientis wUni], ONI55764.1 hypothetical protein N500_1184 [Wolbachia pipientis wUni], ONI56648.1 pilin gene-inverting protein_ partial [Wolbachia pipientis wUni], ONI56668.1 transposase IS116/IS110/IS902 family protein [Wolbachia pipientis wUni], ONI56676.1 transposase IS116/IS110/IS902 family protein_ partial [Wolbachia pipientis wUni], ONI56…			OG0000004	0	0	0	1	8	1	0	17	3	0	4	1	5	22	1	1	6	0		3.88889	6.21089		OG0000004	-0.62614	-0.62614	-0.62614	-0.465133	0.66192	-0.465133
OG0000005	wOo_08460 wOo_08460 hypothetical protein 768216_768563 forward MW_12306	WP_014869171.1 MULTISPECIES_ membrane protein [Wolbachia]		BAO99779.1 putative uncharacterized protein [Wolbachia endosymbiont of Cimex lectularius], BAO99785.1 putative uncharacterized protein [Wolbachia endosymbiont of Cimex lectularius], BAO99787.1 putative uncharacterized protein [Wolbachia endosymbiont of Cimex lectularius]	CDR78780.1 TrbC/VIRB2 family [Wolbachia], CDR78898.1 TrbC/VIRB2 family [Wolbachia], CDR78958.1 TrbC/VIRB2 family [Wolbachia], CDR79633.1 TrbC/VIRB2 family [Wolbachia], CDR79634.1 TrbC/VIRB2 family [Wolbachia], CDR79635.1 TrbC/VIRB2 family [Wolbachia]	AAS14080.1 hypothetical protein WD_0351 [Wolbachia endosymbiont of Drosophila melanogaster], AAS14194.1 hypothetical protein WD_0474 [Wolbachia endosymbiont of Drosophila melanogaster], AAS14349.1 hypothetical protein WD_0651 [Wolbachia endosymbiont of Drosophila melanogaster], AAS14932.1 hypothetical protein WD_1288 [Wolbachia endosymbiont of Drosophila melanogaster], AAS14933.1 hypothetical pro…	AGJ99776.1 Type IV secretion system protein VirB2_ putative [Wolbachia endosymbiont of Drosophila simulans wHa], AGJ99948.1 hypothetical protein wHa_04920 [Wolbachia endosymbiont of Drosophila simulans wHa], AGJ99994.1 Type IV secretion system protein VirB2_ putative [Wolbachia endosymbiont of Drosophila simulans wHa], AGK00481.1 Type IV secretion system protein VirB2_ putative [Wolbachia endosym…	ACN95113.1 hypothetical protein WRi_002930 [Wolbachia sp. wRi], ACN95270.1 hypothetical protein WRi_004880 [Wolbachia sp. wRi], ACN95990.1 hypothetical protein WRi_013140 [Wolbachia sp. wRi], ACN95991.1 hypothetical protein WRi_013150 [Wolbachia sp. wRi], ACN95992.1 hypothetical protein WRi_013160 [Wolbachia sp. wRi]	AGJ99113.1 Type IV secretion system protein VirB2_ putative [Wolbachia endosymbiont of Drosophila simulans wNo], AGJ99246.1 Type IV secretion system protein VirB2_ putative [Wolbachia endosymbiont of Drosophila simulans wNo], AGJ99453.1 Type IV secretion system protein VirB2_ putative [Wolbachia endosymbiont of Drosophila simulans wNo]	CAQ55024.1 Putative membrane protein [Wolbachia endosymbiont of Culex quinquefasciatus Pel], CAQ55305.1 Putative membrane protein [Wolbachia endosymbiont of Culex quinquefasciatus Pel], CAQ55381.1 Putaive membrane protein [Wolbachia endosymbiont of Culex quinquefasciatus Pel]	WP_006279664.1 MULTISPECIES_ membrane protein [Wolbachia], WP_010081965.1 MULTISPECIES_ hypothetical protein [Wolbachia], WP_010081966.1 hypothetical protein [Wolbachia pipientis], WP_038198436.1 type IV secretion system protein VirB2 [Wolbachia pipientis], WP_038198654.1 hypothetical protein [Wolbachia pipientis], WP_038198922.1 membrane protein [Wolbachia pipientis]	WP_007302562.1 MULTISPECIES_ membrane protein [Wolbachia], WP_007302624.1 MULTISPECIES_ membrane protein [Wolbachia], WP_019236849.1 membrane protein [Wolbachia pipientis]	WP_047758879.1 membrane protein [Wolbachia endosymbiont of Armadillidium vulgare], WP_047758905.1 membrane protein [Wolbachia endosymbiont of Armadillidium vulgare], WP_047758961.1 hypothetical protein [Wolbachia endosymbiont of Armadillidium vulgare], WP_047758962.1 membrane protein [Wolbachia endosymbiont of Armadillidium vulgare]	wFol_00700 wFol_00700 Putative type IV secretion system protein VirB2 94180_94569 reverse MW_13590, wFol_00710 wFol_00710 Putative type IV secretion system protein VirB2 94683_95045 reverse MW_13011, wFol_06620 wFol_06620 TrbC/VIRB2 family protein 788113_788457 forward MW_12068, wFol_06630 wFol_06630 TrbC/VIRB2 family protein 788690_789121 forward MW_16373, wFol_12690 wFol_12690 Putative type IV …	OCA06271.1 trbC/VIRB2 family protein [Wolbachia endosymbiont of Trichogramma pretiosum], OCA06722.1 trbC/VIRB2 family protein [Wolbachia endosymbiont of Trichogramma pretiosum]	wLcla02300 wLcla02300 TrbC/VIRB2 family protein 200568_200921 forward MW_12053, wLcla11720 wLcla11720 TrbC/VIRB2 family protein 1071765_1072100 reverse MW_12052	ONI55757.1 trbC/VIRB2 family protein [Wolbachia pipientis wUni], ONI56383.1 trbC/VIRB2 family protein [Wolbachia pipientis wUni], ONI56435.1 trbC/VIRB2 family protein [Wolbachia pipientis wUni], ONI56578.1 trbC/VIRB2 family protein [Wolbachia pipientis wUni], ONI56635.1 trbC/VIRB2 family protein [Wolbachia pipientis wUni]	OEY86972.1 hypothetical protein BIY23_00515 [Wolbachia pipientis]		OG0000005	1	1	0	3	6	6	6	5	3	3	6	3	4	5	2	2	5	1		3.44444	2.00653		OG0000005	-1.21825	-1.21825	-1.71662	-0.2215	1.27362	1.27362
OG0000006							AGJ99703.1 Transposase_ IS481 family [Wolbachia endosymbiont of Drosophila simulans wHa], AGJ99901.1 Transposase_ IS481 family [Wolbachia endosymbiont of Drosophila simulans wHa]	ACN94927.1 transposase [Wolbachia sp. wRi], ACN95171.1 transposase [Wolbachia sp. wRi], ACN95178.1 transposase [Wolbachia sp. wRi], ACN95409.1 transposase [Wolbachia sp. wRi], ACN95616.1 transposase [Wolbachia sp. wRi]				WP_019236527.1 hypothetical protein [Wolbachia pipientis], WP_019236582.1 transposase [Wolbachia pipientis]			OCA05756.1 putative iSSod13_ transposase [Wolbachia endosymbiont of Trichogramma pretiosum], OCA05761.1 hypothetical protein wTpre_80 [Wolbachia endosymbiont of Trichogramma pretiosum], OCA05762.1 putative integrase [Wolbachia endosymbiont of Trichogramma pretiosum], OCA05796.1 putative transposase [Wolbachia endosymbiont of Trichogramma pretiosum], OCA05797.1 integrase core domain protein [Wolba…	wLcla00280 wLcla00280 Transposase_ IS481 family 22005_22718 reverse MW_27318, wLcla00500 wLcla00500 Transposase_ IS481 family 38952_39833 reverse MW_33701, wLcla00550 wLcla00550 Transposase_ IS481 family 41501_41686 forward MW_7407, wLcla01610 wLcla01610 Transposase_ IS481 family 138574_138981 forward MW_15864, wLcla01940 wLcla01940 Transposase_ IS481 family 168901_169575 reverse MW_25966, wLcla0…				OG0000006	0	0	0	0	0	0	2	5	0	0	0	2	0	0	28	16	0	0		2.94444	7.34424		OG0000006	-0.400919	-0.400919	-0.400919	-0.400919	-0.400919	-0.400919
OG0000007					CDR79207.1 transposase [Wolbachia]					CAQ54157.1 transposase [Wolbachia endosymbiont of Culex quinquefasciatus Pel], CAQ54164.1 transposase [Wolbachia endosymbiont of Culex quinquefasciatus Pel], CAQ54199.1 transposase [Wolbachia endosymbiont of Culex quinquefasciatus Pel], CAQ54215.1 transposase [Wolbachia endosymbiont of Culex quinquefasciatus Pel], CAQ54219.1 transposase [Wolbachia endosymbiont of Culex quinquefasciatus Pel], CAQ5…		WP_019236992.1 transposase [Wolbachia pipientis]		wFol_10210 wFol_10210 Transposase_ IS982 family 1206584_1207093 forward MW_19457, wFol_10460 wFol_10460 Transposase_ IS982 family 1245755_1246264 reverse MW_19457	OCA07065.1 transposase DDE domain protein [Wolbachia endosymbiont of Trichogramma pretiosum]		ONI56171.1 putative protease domain protein_ partial [Wolbachia pipientis wUni]			OG0000007	0	0	0	0	1	0	0	0	0	46	0	1	0	2	1	0	1	0		2.88889	10.7752		OG0000007	-0.268106	-0.268106	-0.268106	-0.268106	-0.1753	-0.268106
OG0000008				BAO99702.1 putative uncharacterized protein [Wolbachia endosymbiont of Cimex lectularius], BAO99707.1 putative uncharacterized protein [Wolbachia endosymbiont of Cimex lectularius], BAO99708.1 putative uncharacterized protein [Wolbachia endosymbiont of Cimex lectularius], BAO99751.1 putative uncharacterized protein [Wolbachia endosymbiont of Cimex lectularius], BAO99763.1 putative uncharacterized…	CDR78504.1 hypothetical protein WPAU_0108 [Wolbachia], CDR78505.1 hypothetical protein WPAU_0109 [Wolbachia], CDR78507.1 hypothetical protein WPAU_0111 [Wolbachia], CDR78665.1 hypothetical protein WPAU_0273 [Wolbachia], CDR78689.1 hypothetical protein WPAU_0297 [Wolbachia], CDR78834.1 hypothetical protein WPAU_0446 [Wolbachia], CDR79037.1 hypothetical protein WPAU_0658 [Wolbachia], CDR79478.1 hyp…	AAS13877.1 hypothetical protein WD_0123 [Wolbachia endosymbiont of Drosophila melanogaster], AAS13879.1 hypothetical protein WD_0125 [Wolbachia endosymbiont of Drosophila melanogaster], AAS13881.1 hypothetical protein WD_0127 [Wolbachia endosymbiont of Drosophila melanogaster], AAS14008.1 hypothetical protein WD_0268 [Wolbachia endosymbiont of Drosophila melanogaster], AAS14128.1 hypothetical pro…	AGJ99601.1 hypothetical protein wHa_01090 [Wolbachia endosymbiont of Drosophila simulans wHa], AGJ99720.1 hypothetical protein wHa_02430 [Wolbachia endosymbiont of Drosophila simulans wHa], AGK00269.1 hypothetical protein wHa_08480 [Wolbachia endosymbiont of Drosophila simulans wHa]	ACN94977.1 hypothetical protein WRi_001260 [Wolbachia sp. wRi], ACN95336.1 hypothetical protein WRi_005590 [Wolbachia sp. wRi], ACN95678.1 hypothetical protein WRi_009710 [Wolbachia sp. wRi], ACN95730.1 hypothetical protein WRi_010250 [Wolbachia sp. wRi]		CAQ54486.1 hypothetical protein WP0378 [Wolbachia endosymbiont of Culex quinquefasciatus Pel], CAQ54820.1 hypothetical protein WP0712 [Wolbachia endosymbiont of Culex quinquefasciatus Pel]	WP_006279413.1 MULTISPECIES_ hypothetical protein [Wolbachia], WP_006279415.1 MULTISPECIES_ hypothetical protein [Wolbachia], WP_010081986.1 MULTISPECIES_ hypothetical protein [Wolbachia], WP_010962565.1 MULTISPECIES_ hypothetical protein [Wolbachia], WP_038199513.1 hypothetical protein [Wolbachia pipientis]	WP_007302130.1 MULTISPECIES_ hypothetical protein [Wolbachia], WP_007302904.1 MULTISPECIES_ hypothetical protein [Wolbachia]	WP_047758704.1 hypothetical protein [Wolbachia endosymbiont of Armadillidium vulgare], WP_047759330.1 hypothetical protein_ partial [Wolbachia endosymbiont of Armadillidium vulgare], WP_047759566.1 hypothetical protein [Wolbachia endosymbiont of Armadillidium vulgare]	wFol_03310 wFol_03310 Uncharacterized protein 389956_390165 reverse MW_8151, wFol_05510 wFol_05510 Uncharacterized protein 662962_663171 reverse MW_8151, wFol_05780 wFol_05780 Uncharacterized protein 688653_688928 forward MW_10507, wFol_06380 wFol_06380 Uncharacterized protein 761555_761818 forward MW_9692			ONI56465.1 hypothetical protein N500_0443 [Wolbachia pipientis wUni], ONI56758.1 hypothetical protein N500_0151 [Wolbachia pipientis wUni], ONI56759.1 hypothetical protein N500_0152 [Wolbachia pipientis wUni]			OG0000008	0	0	0	8	8	8	3	4	0	2	5	2	3	4	0	0	3	0		2.77778	2.92163		OG0000008	-0.950762	-0.950762	-0.950762	1.78743	1.78743	1.78743
OG0000009					CDR78595.1 IS5 family transposase_Transposase DDE domain [Wolbachia], CDR78653.1 IS5 family transposase [Wolbachia], CDR78751.1 IS5 family transposase [Wolbachia], CDR78755.1 IS5 family transposase_Transposase DDE domain [Wolbachia], CDR79126.1 IS5 family transposase [Wolbachia], CDR79246.1 IS5 family transposase [Wolbachia], CDR79262.1 IS5 family transposase_Transposase DDE domain [Wolbachia], C…	AAS14612.1 transposase_ IS5 family_ truncation [Wolbachia endosymbiont of Drosophila melanogaster]					WP_010962940.1 MULTISPECIES_ transposase [Wolbachia], WP_022626339.1 MULTISPECIES_ transposase [Wolbachia], WP_051955819.1 transposase [Wolbachia pipientis], WP_051955861.1 transposase_ partial [Wolbachia pipientis]	WP_007301972.1 MULTISPECIES_ transposase [Wolbachia], WP_019078687.1 MULTISPECIES_ hypothetical protein [Wolbachia], WP_038197754.1 MULTISPECIES_ transposase [Wolbachia]	WP_047758792.1 hypothetical protein [Wolbachia endosymbiont of Armadillidium vulgare], WP_047758869.1 hypothetical protein [Wolbachia endosymbiont of Armadillidium vulgare], WP_047759080.1 hypothetical protein [Wolbachia endosymbiont of Armadillidium vulgare], WP_047759139.1 hypothetical protein [Wolbachia endosymbiont of Armadillidium vulgare]	wFol_06800 wFol_06800 Transposase_ IS5 family_ truncation 805930_806430 forward MW_19661	OCA05702.1 hypothetical protein wTpre_21 [Wolbachia endosymbiont of Trichogramma pretiosum], OCA05827.1 transposase_ IS5 family [Wolbachia endosymbiont of Trichogramma pretiosum], OCA05999.1 transposase_ IS5 family [Wolbachia endosymbiont of Trichogramma pretiosum], OCA06022.1 transposase domain protein [Wolbachia endosymbiont of Trichogramma pretiosum], OCA06096.1 hypothetical protein wTpre_419 …	wLcla04160 wLcla04160 Transposase_ IS5 family 358623_359111 forward MW_19067, wLcla06200 wLcla06200 Transposase_ IS5 family 576083_576571 forward MW_19067, wLcla07490 wLcla07490 Transposase_ IS5 family 690796_691284 reverse MW_19067, wLcla08310 wLcla08310 Transposase_ IS5 family 758388_758711 reverse MW_12679	ONI56392.1 putative transposase [Wolbachia pipientis wUni], ONI56546.1 transposase DDE domain protein [Wolbachia pipientis wUni], ONI56580.1 transposase DDE domain protein [Wolbachia pipientis wUni], ONI56627.1 putative transposase [Wolbachia pipientis wUni], ONI56713.1 transposase DDE domain protein [Wolbachia pipientis wUni], ONI56808.1 transposase DDE domain protein [Wolbachia pipientis wUni],…			OG0000009	0	0	0	0	12	1	0	0	0	0	4	3	4	1	10	4	8	0		2.61111	3.79068		OG0000009	-0.688823	-0.688823	-0.688823	-0.688823	2.47683	-0.425019
OG0000010			gi|58584431|ref|YP_198004.1| RadC-like DNA repair protein [Wolbachia endosymbiont strain TRS of Brugia malayi]	BAO99571.1 DNA repair protein RadC [Wolbachia endosymbiont of Cimex lectularius]	CDR78645.1 Putative dna repair protein radc_hypothetical protein_hypothetical protein_DNA repair protein RadC_Protein of unknown function _DUF2466_ [Wolbachia], CDR78785.1 DNA repair protein RadC_hypothetical protein_hypothetical protein_DNA repair protein RadC_Protein of unknown function _DUF2466_ [Wolbachia], CDR79068.1 Putative dna repair protein radc_hypothetical protein_hypothetical protein_…	AAS13999.1 DNA repair protein RadC_ truncation [Wolbachia endosymbiont of Drosophila melanogaster], AAS14086.1 DNA repair protein RadC [Wolbachia endosymbiont of Drosophila melanogaster], AAS14222.1 DNA repair protein RadC_ truncation [Wolbachia endosymbiont of Drosophila melanogaster], AAS14325.1 DNA repair protein RadC_ putative [Wolbachia endosymbiont of Drosophila melanogaster]	AGJ99942.1 DNA repair protein RadC [Wolbachia endosymbiont of Drosophila simulans wHa]	ACN95177.1 DNA repair protein RadC_ putative [Wolbachia sp. wRi], ACN95223.1 DNA repair protein RadC [Wolbachia sp. wRi], ACN95364.1 DNA repair protein RadC_ putative [Wolbachia sp. wRi], ACN95427.1 DNA repair protein RadC [Wolbachia sp. wRi], ACN95758.1 DNA repair protein RadC_ putative [Wolbachia sp. wRi]	AGJ98653.1 Putative DNA repair protein RadC [Wolbachia endosymbiont of Drosophila simulans wNo], AGJ98929.1 DNA repair protein RadC 1 [Wolbachia endosymbiont of Drosophila simulans wNo], AGJ99407.1 DNA repair protein RadC 2 [Wolbachia endosymbiont of Drosophila simulans wNo], AGJ99423.1 DNA repair protein RadC 3 [Wolbachia endosymbiont of Drosophila simulans wNo]	CAQ54384.1 Putative dna repair protein radc [Wolbachia endosymbiont of Culex quinquefasciatus Pel], CAQ54567.1 Putative dna repair protein radc [Wolbachia endosymbiont of Culex quinquefasciatus Pel], CAQ55450.1 Putative dna repair protein radc [Wolbachia endosymbiont of Culex quinquefasciatus Pel]	WP_010962534.1 MULTISPECIES_ DNA repair protein RadC [Wolbachia]	WP_019078756.1 MULTISPECIES_ DNA repair protein RadC [Wolbachia], WP_019236459.1 hypothetical protein_ partial [Wolbachia pipientis], WP_019236552.1 hypothetical protein_ partial [Wolbachia pipientis], WP_019236578.1 DNA repair protein RadC [Wolbachia pipientis], WP_019236972.1 DNA repair protein RadC [Wolbachia pipientis]	WP_047758956.1 DNA repair protein RadC [Wolbachia endosymbiont of Armadillidium vulgare], WP_047758965.1 DNA repair protein RadC [Wolbachia endosymbiont of Armadillidium vulgare], WP_047759679.1 DNA repair protein RadC [Wolbachia endosymbiont of Armadillidium vulgare]	wFol_02280 radC RadC family protein 265698_266375 forward MW_25642, wFol_02710 radC RadC family protein 317545_318228 reverse MW_25846, wFol_03080 radC RadC family protein 368180_368830 forward MW_24636, wFol_05300 radC RadC family protein 644002_644652 forward MW_24622, wFol_06330 radC RadC family protein 755763_756416 forward MW_24726, wFol_09170 radC RadC family protein 1087313_1087963 reverse…	OCA05830.1 radC-like JAB domain protein [Wolbachia endosymbiont of Trichogramma pretiosum], OCA06995.1 radC-like JAB domain protein [Wolbachia endosymbiont of Trichogramma pretiosum], OCA06996.1 putative dNA repair protein [Wolbachia endosymbiont of Trichogramma pretiosum]	wLcla01340 radC DNA repair protein RadC 112453_113133 forward MW_25926	ONI56245.1 DNA repair protein RadC domain protein_ partial [Wolbachia pipientis wUni], ONI56426.1 DNA repair protein RadC family protein [Wolbachia pipientis wUni]	OEY86836.1 hypothetical protein BIY23_04770 [Wolbachia pipientis], OEY86862.1 hypothetical protein BIY23_04515 [Wolbachia pipientis]		OG0000010	0	0	1	1	3	4	1	5	4	3	1	5	3	8	3	1	2	2		2.61111	2.06195		OG0000010	-1.26633	-1.26633	-0.781353	-0.781353	0.188603	0.673581
OG0000011					CDR78596.1 Putative transposase _fragment_ [Wolbachia], CDR78654.1 Putative transposase _fragment__Transposase DDE domain [Wolbachia], CDR78749.1 IS5 family transposase [Wolbachia], CDR78757.1 Putative transposase _fragment_ [Wolbachia], CDR79127.1 Putative transposase _fragment_ [Wolbachia], CDR79248.1 IS5 family transposase [Wolbachia], CDR79264.1 Putative transposase _fragment_ [Wolbachia], CD…	AAS14557.1 transposase_ IS5 family_ truncation [Wolbachia endosymbiont of Drosophila melanogaster], AAS14603.1 transposase_ IS5 family_ interruption-N [Wolbachia endosymbiont of Drosophila melanogaster]			AGJ99248.1 Putative transposase [Wolbachia endosymbiont of Drosophila simulans wNo]	CAQ54276.1 Putative transposase _fragment_ [Wolbachia endosymbiont of Culex quinquefasciatus Pel], CAQ54651.1 transposase_ _fragment_ [Wolbachia endosymbiont of Culex quinquefasciatus Pel]	WP_007548762.1 MULTISPECIES_ transposase [Wolbachia], WP_010082361.1 hypothetical protein [Wolbachia pipientis], WP_044471196.1 MULTISPECIES_ transposase [Wolbachia], WP_044471264.1 MULTISPECIES_ transposase [Wolbachia]	WP_019236638.1 MULTISPECIES_ hypothetical protein [Wolbachia], WP_019236989.1 MULTISPECIES_ hypothetical protein [Wolbachia]		wFol_02080 wFol_02080 Transposase_ IS5 family 237341_238291 forward MW_36848, wFol_02250 wFol_02250 Transposase_ IS5 family 261958_262917 forward MW_37451, wFol_02360 wFol_02360 Transposase_ IS5 family 275353_276312 reverse MW_37451, wFol_04230 wFol_04230 Transposase_ IS5 family 518730_519689 reverse MW_37451, wFol_06790 wFol_06790 Transposase_ IS5 family 805472_805897 forward MW_16189, wFol_0681…	OCA05700.1 putative transposase [Wolbachia endosymbiont of Trichogramma pretiosum], OCA06097.1 putative transposase [Wolbachia endosymbiont of Trichogramma pretiosum], OCA06897.1 putative transposase [Wolbachia endosymbiont of Trichogramma pretiosum]	wLcla04150 wLcla04150 Transposase_ IS5 family 358162_358464 forward MW_11786, wLcla06190 wLcla06190 Transposase_ IS5 family 575535_575924 forward MW_15294, wLcla06660 wLcla06660 Transposase_ IS5 family 614499_614744 forward MW_9590, wLcla07500 wLcla07500 Transposase_ IS5 family 691443_691745 reverse MW_11786, wLcla08050 wLcla08050 Transposase_ IS5 family 735007_735273 reverse MW_10314, wLcla08320…	ONI56223.1 putative transposase_ partial [Wolbachia pipientis wUni]			OG0000011	0	0	0	0	12	2	0	0	1	2	4	2	0	11	3	7	1	0		2.5	3.76126		OG0000011	-0.664671	-0.664671	-0.664671	-0.664671	2.52575	-0.132934
OG0000012				BAO99701.1 putative addiction module toxin [Wolbachia endosymbiont of Cimex lectularius], BAO99709.1 putative uncharacterized protein [Wolbachia endosymbiont of Cimex lectularius], BAO99752.1 putative addiction module toxin [Wolbachia endosymbiont of Cimex lectularius], BAO99762.1 conserved hypothetical protein-degenerate [Wolbachia endosymbiont of Cimex lectularius], BAO99764.1 putative addictio…	CDR78506.1 Putative addiction module toxin_ RelE/StbE_addiction module toxin_ RelE/StbE family_Plasmid stabilisation system protein [Wolbachia], CDR78508.1 Putative addiction module toxin_ RelE/StbE_Toxin RelG_addiction module toxin_ RelE/StbE family_Plasmid stabilisation system protein [Wolbachia], CDR78664.1 Putative phage related protein_Toxin RelG [Wolbachia], CDR78690.1 Putative addiction mo…	AAS13876.1 conserved hypothetical protein [Wolbachia endosymbiont of Drosophila melanogaster], AAS13878.1 conserved hypothetical protein [Wolbachia endosymbiont of Drosophila melanogaster], AAS13880.1 conserved hypothetical protein_ degenerate [Wolbachia endosymbiont of Drosophila melanogaster], AAS14009.1 conserved hypothetical protein [Wolbachia endosymbiont of Drosophila melanogaster], AAS1412…	AGJ99602.1 hypothetical protein wHa_01100 [Wolbachia endosymbiont of Drosophila simulans wHa], AGJ99721.1 Putative addiction module toxin_ RelE/StbE [Wolbachia endosymbiont of Drosophila simulans wHa], AGJ99843.1 hypothetical protein wHa_03760 [Wolbachia endosymbiont of Drosophila simulans wHa]	ACN94978.1 Putative addiction module toxin_ RelE/StbE [Wolbachia sp. wRi], ACN95335.1 Putative addiction module toxin protein [Wolbachia sp. wRi], ACN95729.1 Putative addiction module toxin protein [Wolbachia sp. wRi]	AGJ98806.1 hypothetical protein wNo_03760 [Wolbachia endosymbiont of Drosophila simulans wNo]	CAQ54821.1 hypothetical protein WP0713 [Wolbachia endosymbiont of Culex quinquefasciatus Pel], CAQ54822.1 hypothetical protein WP0714 [Wolbachia endosymbiont of Culex quinquefasciatus Pel], CAQ55437.1 Putative phage related protein [Wolbachia endosymbiont of Culex quinquefasciatus Pel]	WP_007550684.1 MULTISPECIES_ addiction module antitoxin RelB [Wolbachia], WP_010962380.1 MULTISPECIES_ addiction module antitoxin RelB [Wolbachia], WP_010962566.1 MULTISPECIES_ addiction module antitoxin RelB [Wolbachia]	WP_019236726.1 MULTISPECIES_ hypothetical protein [Wolbachia]	WP_047758703.1 addiction module antitoxin RelB [Wolbachia endosymbiont of Armadillidium vulgare], WP_047759567.1 addiction module antitoxin RelB [Wolbachia endosymbiont of Armadillidium vulgare]	wFol_03300 wFol_03300 Toxin-antitoxin system_ RelE/ParE toxin family 389691_389972 reverse MW_10614, wFol_05500 relG_2 Putative ParE toxin of type II toxin-antitoxin system_ parDE 662697_662978 reverse MW_10614, wFol_05790 wFol_05790 Putative ParE toxin of type II toxin-antitoxin system_ parDE 688919_689203 forward MW_11129	OCA06820.1 hypothetical protein wTpre_1170 [Wolbachia endosymbiont of Trichogramma pretiosum]	wLcla09640 wLcla09640 Uncharacterized protein 878224_878382 reverse MW_6307	ONI56464.1 cytotoxic translational repressor of toxin-antitoxin system RelE [Wolbachia pipientis wUni], ONI56760.1 cytotoxic translational repressor of toxin-antitoxin system RelE [Wolbachia pipientis wUni]			OG0000012	0	0	0	8	6	6	3	3	1	3	3	1	2	3	1	1	2	0		2.38889	2.30444		OG0000012	-1.03664	-1.03664	-1.03664	2.43491	1.56702	1.56702
OG0000013	wOo_01750 wOo_01750 XRE family transcriptional regulator 161624_161905 forward MW_10634, wOo_09050 wOo_09050 XRE family transcriptional regulator 819811_820086 forward MW_10388	WP_014868782.1 MULTISPECIES_ transcriptional regulator [Wolbachia], WP_014869208.1 MULTISPECIES_ DNA-binding protein [Wolbachia]	gi|58584643|ref|YP_198216.1| Transcriptional regulator of HTH-type_ xre family [Wolbachia endosymbiont strain TRS of Brugia malayi], gi|58584755|ref|YP_198328.1| Predicted transcriptional regulator_ XRE family [Wolbachia endosymbiont strain TRS of Brugia malayi]	BAO99631.1 predicted transcriptional regulator XRE family [Wolbachia endosymbiont of Cimex lectularius], BAP00221.1 transcriptional regulator of HTH-type xre family [Wolbachia endosymbiont of Cimex lectularius]	CDR79431.1 XRE family transcriptional regulator_Uncharacterized conserved small protein [Wolbachia], CDR79650.1 Putative transcriptional regulator_Uncharacterized conserved small protein [Wolbachia]	AAS14602.1 conserved domain protein [Wolbachia endosymbiont of Drosophila melanogaster], AAS14946.1 conserved hypothetical protein [Wolbachia endosymbiont of Drosophila melanogaster]	AGK00212.1 Putative transcriptional regulator [Wolbachia endosymbiont of Drosophila simulans wHa], AGK00495.1 hypothetical protein wHa_10870 [Wolbachia endosymbiont of Drosophila simulans wHa]	ACN95612.1 hypothetical protein WRi_008830 [Wolbachia sp. wRi], ACN96005.1 hypothetical protein WRi_013330 [Wolbachia sp. wRi]	AGJ99028.1 Putative transcriptional regulator [Wolbachia endosymbiont of Drosophila simulans wNo]	CAQ55166.1 Putative transcriptional regulator [Wolbachia endosymbiont of Culex quinquefasciatus Pel]	WP_010082632.1 MULTISPECIES_ DNA-binding protein [Wolbachia], WP_038198452.1 transcriptional regulator [Wolbachia pipientis]	WP_007302434.1 MULTISPECIES_ DNA-binding protein [Wolbachia]	WP_047759418.1 DNA-binding protein [Wolbachia endosymbiont of Armadillidium vulgare]	wFol_00340 wFol_00340 Putative phage repressor protein 44201_44476 forward MW_10077, wFol_02990 wFol_02990 Putative phage repressor protein 358761_359051 forward MW_10940, wFol_03060 wFol_03060 Putative phage repressor protein 366954_367310 reverse MW_13692, wFol_03170 wFol_03170 Putative phage repressor protein 378773_379030 reverse MW_9824, wFol_05270 wFol_05270 Putative phage repressor protein…	OCA06427.1 helix-turn-helix domain protein [Wolbachia endosymbiont of Trichogramma pretiosum]	wLcla06090 wLcla06090 Putative transcriptional regulator 565236_565532 reverse MW_10844	ONI55773.1 transcriptional regulator of HTH-type_ xre family [Wolbachia pipientis wUni], ONI56108.1 transcriptional regulator_ XRE family [Wolbachia pipientis wUni]	OEY86888.1 DNA-binding protein [Wolbachia pipientis]		OG0000013	2	2	2	2	2	2	2	2	1	1	2	1	1	13	1	1	2	1		2.22222	2.73443		OG0000013	-0.0812681	-0.0812681	-0.0812681	-0.0812681	-0.0812681	-0.0812681
OG0000014					CDR78443.1 transposase_ degenerate [Wolbachia], CDR79089.1 transposase_Transposase IS66 family [Wolbachia], CDR79341.1 transposase_ degenerate [Wolbachia], CDR79363.1 transposase_ degenerate_Transposase and inactivated derivatives [Wolbachia]	AAS13813.1 hypothetical protein WD_0049 [Wolbachia endosymbiont of Drosophila melanogaster], AAS13814.1 transposase_ degenerate [Wolbachia endosymbiont of Drosophila melanogaster], AAS14579.1 hypothetical protein WD_0899 [Wolbachia endosymbiont of Drosophila melanogaster], AAS14583.1 transposase_ degenerate [Wolbachia endosymbiont of Drosophila melanogaster]		ACN94962.1 transposase [Wolbachia sp. wRi], ACN95023.1 transposase [Wolbachia sp. wRi], ACN95030.1 transposase [Wolbachia sp. wRi], ACN95055.1 transposase [Wolbachia sp. wRi], ACN95059.1 transposase [Wolbachia sp. wRi], ACN95072.1 transposase [Wolbachia sp. wRi], ACN95114.1 transposase [Wolbachia sp. wRi], ACN95169.1 transposase [Wolbachia sp. wRi], ACN95309.1 transposase [Wolbachia sp. wRi], ACN…		CAQ54370.1 Putative transposase [Wolbachia endosymbiont of Culex quinquefasciatus Pel]	WP_010962333.1 MULTISPECIES_ transposase [Wolbachia], WP_038199198.1 transposase [Wolbachia pipientis]		WP_047759252.1 transposase [Wolbachia endosymbiont of Armadillidium vulgare]				ONI56129.1 putative transposase [Wolbachia pipientis wUni], ONI56252.1 putative transposase [Wolbachia pipientis wUni], ONI56610.1 transposase [Wolbachia pipientis wUni], ONI56854.1 hypothetical protein N500_0051 [Wolbachia pipientis wUni], ONI56855.1 transposase [Wolbachia pipientis wUni]			OG0000014	0	0	0	0	4	4	0	22	0	1	2	0	1	0	0	0	5	0		2.16667	5.21593		OG0000014	-0.415394	-0.415394	-0.415394	-0.415394	0.351488	0.351488
OG0000015					CDR78677.1 Putative phage related protein_DNA repair protein RadA_DNA repair protein RadA [Wolbachia], CDR78679.1 putative phage related protein [Wolbachia]	AAS14288.1 hypothetical protein WD_0583 [Wolbachia endosymbiont of Drosophila melanogaster], AAS14289.1 hypothetical protein WD_0584 [Wolbachia endosymbiont of Drosophila melanogaster], AAS14291.1 hypothetical protein WD_0586 [Wolbachia endosymbiont of Drosophila melanogaster], AAS14294.1 hypothetical protein WD_0589 [Wolbachia endosymbiont of Drosophila melanogaster]	AGJ99831.1 hypothetical protein wHa_03640 [Wolbachia endosymbiont of Drosophila simulans wHa], AGJ99833.1 hypothetical protein wHa_03660 [Wolbachia endosymbiont of Drosophila simulans wHa]	ACN95508.1 hypothetical protein WRi_007590 [Wolbachia sp. wRi]	AGJ98578.1 hypothetical protein wNo_01340 [Wolbachia endosymbiont of Drosophila simulans wNo]	CAQ54374.1 Putative phage related protein [Wolbachia endosymbiont of Culex quinquefasciatus Pel], CAQ54541.1 putative phage related protein [Wolbachia endosymbiont of Culex quinquefasciatus Pel], CAQ54544.1 Putative phage related protein [Wolbachia endosymbiont of Culex quinquefasciatus Pel], CAQ55424.1 putative phage related protein [Wolbachia endosymbiont of Culex quinquefasciatus Pel]		WP_019236435.1 hypothetical protein [Wolbachia pipientis], WP_019236437.1 hypothetical protein [Wolbachia pipientis], WP_026097209.1 hypothetical protein_ partial [Wolbachia pipientis], WP_038197863.1 hypothetical protein [Wolbachia pipientis]	WP_047759127.1 hypothetical protein [Wolbachia endosymbiont of Armadillidium vulgare], WP_047759165.1 hypothetical protein [Wolbachia endosymbiont of Armadillidium vulgare], WP_047759167.1 hypothetical protein [Wolbachia endosymbiont of Armadillidium vulgare], WP_047759183.1 phage related protein [Wolbachia endosymbiont of Armadillidium vulgare], WP_047759372.1 hypothetical protein [Wolbachia end…	wFol_05620 wFol_05620 Presumed DNA repair protein 673826_675088 reverse MW_47363, wFol_05640 wFol_05640 Presumed DNA repair protein 675620_676441 reverse MW_31101, wFol_05960 wFol_05960 Presumed DNA repair protein 702249_703067 reverse MW_30995, wFol_05990 wFol_05990 Putative DNA repair protein 704501_706570 reverse MW_78717, wFol_09550 wFol_09550 Putative phage related protein 1136392_1138479 re…	OCA07045.1 AAA domain protein [Wolbachia endosymbiont of Trichogramma pretiosum]		ONI56235.1 hypothetical protein N500_0691 [Wolbachia pipientis wUni]			OG0000015	0	0	0	0	2	4	2	1	1	4	0	4	7	9	1	0	1	0		2	2.63461		OG0000015	-0.759125	-0.759125	-0.759125	-0.759125	0	0.759125
OG0000016			gi|58584397|ref|YP_197970.1| hypothetical protein Wbm0137 [Wolbachia endosymbiont strain TRS of Brugia malayi]	BAO99647.1 putative transposase [Wolbachia endosymbiont of Cimex lectularius], BAO99720.1 putative uncharacterized protein [Wolbachia endosymbiont of Cimex lectularius], BAO99767.1 polynucleotide phosphorylase/polyadenylase [Wolbachia endosymbiont of Cimex lectularius], BAP00133.1 arsenical-resistance protein [Wolbachia endosymbiont of Cimex lectularius], BAP00227.1 hypothetical protein WCLE_0093…	CDR78766.1 hypothetical protein WPAU_0375 [Wolbachia], CDR79189.1 hypothetical protein WPAU_0816 [Wolbachia]	AAS14069.1 hypothetical protein WD_0338 [Wolbachia endosymbiont of Drosophila melanogaster], AAS14510.1 hypothetical protein WD_0823 [Wolbachia endosymbiont of Drosophila melanogaster]	AGJ99957.1 hypothetical protein wHa_05030 [Wolbachia endosymbiont of Drosophila simulans wHa], AGK00136.1 hypothetical protein wHa_06950 [Wolbachia endosymbiont of Drosophila simulans wHa]	ACN95437.1 hypothetical protein WRi_006790 [Wolbachia sp. wRi], ACN95536.1 hypothetical protein WRi_007890 [Wolbachia sp. wRi]	AGJ98523.1 hypothetical protein wNo_00670 [Wolbachia endosymbiont of Drosophila simulans wNo], AGJ98590.1 hypothetical protein wNo_01510 [Wolbachia endosymbiont of Drosophila simulans wNo]	CAQ54149.1 hypothetical protein WP0040 [Wolbachia endosymbiont of Culex quinquefasciatus Pel], CAQ54589.1 hypothetical protein WP0481 [Wolbachia endosymbiont of Culex quinquefasciatus Pel]	WP_038198650.1 hypothetical protein [Wolbachia pipientis], WP_038199131.1 hypothetical protein [Wolbachia pipientis]	WP_019236337.1 hypothetical protein [Wolbachia pipientis], WP_019236508.1 hypothetical protein [Wolbachia pipientis], WP_019236610.1 hypothetical protein [Wolbachia pipientis]	WP_047759312.1 hypothetical protein [Wolbachia endosymbiont of Armadillidium vulgare], WP_047759716.1 hypothetical protein [Wolbachia endosymbiont of Armadillidium vulgare]	wFol_07690 wFol_07690 Uncharacterized protein 912589_914214 forward MW_61042, wFol_13400 wFol_13400 Uncharacterized protein 1587876_1589033 forward MW_43594	OCA05778.1 hypothetical protein wTpre_97 [Wolbachia endosymbiont of Trichogramma pretiosum], OCA05779.1 hypothetical protein wTpre_98 [Wolbachia endosymbiont of Trichogramma pretiosum], OCA06131.1 hypothetical protein wTpre_454 [Wolbachia endosymbiont of Trichogramma pretiosum]	wLcla03810 wLcla03810 Uncharacterized protein 328961_330493 forward MW_58241	ONI56199.1 hypothetical protein N500_0738_ partial [Wolbachia pipientis wUni], ONI56416.1 hypothetical protein N500_0505 [Wolbachia pipientis wUni]	OEY86842.1 hypothetical protein BIY23_04660 [Wolbachia pipientis], OEY87023.1 hypothetical protein BIY23_00855 [Wolbachia pipientis]		OG0000016	0	0	1	5	2	2	2	2	2	2	2	3	2	2	3	1	2	2		1.94444	1.10997		OG0000016	-1.7518	-1.7518	-0.850876	2.75284	0.0500516	0.0500516
OG0000017	wOo_09600 wOo_09600 Mg2+Co2+ transporter 870335_870643 reverse MW_11984	WP_025264161.1 hypothetical protein [Wolbachia endosymbiont of Onchocerca volvulus]			CDR78514.1 IS4 family transposase_Transposase_Transposase DDE domain [Wolbachia], CDR78627.1 IS4 family transposase_Transposase_Transposase DDE domain [Wolbachia], CDR78885.1 IS4 family transposase_Transposase_Transposase DDE domain [Wolbachia]	AAS13869.1 transposase_ IS4 family [Wolbachia endosymbiont of Drosophila melanogaster], AAS13994.1 transposase_ IS4 family [Wolbachia endosymbiont of Drosophila melanogaster], AAS14269.1 transposase_ IS4 family [Wolbachia endosymbiont of Drosophila melanogaster]	AGJ99681.1 Transposase_ IS4 family [Wolbachia endosymbiont of Drosophila simulans wHa], AGJ99750.1 Transposase_ IS4 family [Wolbachia endosymbiont of Drosophila simulans wHa], AGK00126.1 Transposase_ IS4 family [Wolbachia endosymbiont of Drosophila simulans wHa]						WP_047758886.1 hypothetical protein [Wolbachia endosymbiont of Armadillidium vulgare], WP_047759325.1 transposase_ partial [Wolbachia endosymbiont of Armadillidium vulgare]		OCA06238.1 putative transposase [Wolbachia endosymbiont of Trichogramma pretiosum], OCA06260.1 transposase_ IS4 family [Wolbachia endosymbiont of Trichogramma pretiosum], OCA06262.1 transposase_ IS4 family [Wolbachia endosymbiont of Trichogramma pretiosum], OCA06263.1 transposase_ IS4 family [Wolbachia endosymbiont of Trichogramma pretiosum], OCA06548.1 transposase_ IS4 family [Wolbachia endosymb…		ONI56671.1 transposase DDE domain protein [Wolbachia pipientis wUni], ONI56673.1 hypothetical protein N500_0259 [Wolbachia pipientis wUni]			OG0000017	1	1	0	0	3	3	3	0	0	0	0	0	2	0	19	0	2	0		1.88889	4.43103		OG0000017	-0.200606	-0.200606	-0.426287	-0.426287	0.250757	0.250757
OG0000018		WP_025264391.1 hypothetical protein [Wolbachia endosymbiont of Onchocerca volvulus]	gi|58584355|ref|YP_197928.1| hypothetical protein Wbm0094 [Wolbachia endosymbiont strain TRS of Brugia malayi]	BAO99977.1 ankyrin repeat-containing protein [Wolbachia endosymbiont of Cimex lectularius]	CDR78429.1 ankyrin repeat-containing protein_Ribulose-5-phosphate 4-epimerase and related epimerases and aldolases_transient-receptor-potential calcium channel protein_Ankyrin repeats _3 copies_ [Wolbachia], CDR78917.1 ankyrin repeat domain protein_Ribulose-5-phosphate 4-epimerase and related epimerases and aldolases_transient-receptor-potential calcium channel protein_Ankyrin repeats _3 copies_ …	AAS13801.1 ankyrin repeat domain protein [Wolbachia endosymbiont of Drosophila melanogaster], AAS14215.1 ankyrin repeat domain protein [Wolbachia endosymbiont of Drosophila melanogaster], AAS14216.1 hypothetical protein WD_0499 [Wolbachia endosymbiont of Drosophila melanogaster]	AGJ99527.1 Ankyrin repeat domain protein [Wolbachia endosymbiont of Drosophila simulans wHa], AGJ99755.1 Ankyrin repeat domain protein [Wolbachia endosymbiont of Drosophila simulans wHa]	ACN94899.1 ankyrin repeat domain protein [Wolbachia sp. wRi], ACN95073.1 ankyrin repeat domain protein [Wolbachia sp. wRi]	AGJ98657.1 Ankyrin repeat domain protein [Wolbachia endosymbiont of Drosophila simulans wNo], AGJ99176.1 Ankyrin repeat domain protein [Wolbachia endosymbiont of Drosophila simulans wNo]	CAQ54796.1 ankyrin repeat domain protein [Wolbachia endosymbiont of Culex quinquefasciatus Pel], CAQ55213.1 ankyrin repeat domain protein [Wolbachia endosymbiont of Culex quinquefasciatus Pel]	WP_012673105.1 MULTISPECIES_ hypothetical protein [Wolbachia], WP_038198521.1 hypothetical protein [Wolbachia pipientis]	WP_012481883.1 MULTISPECIES_ hypothetical protein [Wolbachia], WP_019236893.1 MULTISPECIES_ hypothetical protein [Wolbachia]	WP_047758770.1 ankyrin [Wolbachia endosymbiont of Armadillidium vulgare], WP_047759858.1 ankyrin_ partial [Wolbachia endosymbiont of Armadillidium vulgare]	wFol_02140 wFol_02140 Ankyrin repeat domain protein 247841_249370 reverse MW_57736, wFol_06390 wFol_06390 Ankyrin repeat domain protein 762205_764202 forward MW_73809	OCA06360.1 putative ankyrin repeat domain protein [Wolbachia endosymbiont of Trichogramma pretiosum], OCA06361.1 ankyrin repeat family protein [Wolbachia endosymbiont of Trichogramma pretiosum], OCA07076.1 ankyrin repeat family protein [Wolbachia endosymbiont of Trichogramma pretiosum]	wLcla05470 wLcla05470 Ankyrin repeat domain protein 500800_501666 reverse MW_31855, wLcla12270 wLcla12270 Ankyrin repeat domain protein 1129027_1130367 forward MW_50676	ONI56603.1 ankyrin repeat family protein [Wolbachia pipientis wUni], ONI56844.1 ankyrin repeat family protein [Wolbachia pipientis wUni]	OEY86720.1 hypothetical protein BIY23_02585 [Wolbachia pipientis], OEY86855.1 hypothetical protein BIY23_04730 [Wolbachia pipientis]		OG0000018	0	1	1	1	2	3	2	2	2	2	2	2	2	2	3	2	2	2		1.83333	0.707107		OG0000018	-2.59272	-1.17851	-1.17851	-1.17851	0.235702	1.64992
OG0000019	wOo_01560 wOo_01560 elongation factor Tu 138673_139845 forward MW_43034, wOo_10510 wOo_10510 elongation factor Tu 941241_942413 reverse MW_43040	WP_025264205.1 elongation factor Tu [Wolbachia endosymbiont of Onchocerca volvulus], WP_025264278.1 elongation factor Tu [Wolbachia endosymbiont of Onchocerca volvulus]	gi|58584601|ref|YP_198174.1| Translation elongation factor EF-Tu_ GTPase [Wolbachia endosymbiont strain TRS of Brugia malayi], gi|58584910|ref|YP_198483.1| Translation elongation factor EF-Tu_ GTPase [Wolbachia endosymbiont strain TRS of Brugia malayi]	BAO99516.1 translation elongation factor Tu [Wolbachia endosymbiont of Cimex lectularius], BAP00205.1 translation elongation factor Tu [Wolbachia endosymbiont of Cimex lectularius]	CDR78416.1 elongation factor Tu_Elongation factor Tu_elongation factor Tu_GTPases-translation elongation factors_translation elongation factor Tu_Elongation factor Tu GTP binding domain [Wolbachia], CDR78991.1 elongation factor Tu_Elongation factor Tu_elongation factor Tu_GTPases-translation elongation factors_translation elongation factor Tu_Elongation factor Tu GTP binding domain [Wolbachia]	AAS13784.1 translation elongation factor Tu [Wolbachia endosymbiont of Drosophila melanogaster], AAS14381.1 translation elongation factor Tu [Wolbachia endosymbiont of Drosophila melanogaster]	AGJ99514.1 Elongation factor Tu 1 [Wolbachia endosymbiont of Drosophila simulans wHa], AGK00028.1 Elongation factor Tu 2 [Wolbachia endosymbiont of Drosophila simulans wHa]	ACN94886.1 Translation elongation factor Tu [Wolbachia sp. wRi], ACN95303.1 Translation elongation factor Tu [Wolbachia sp. wRi]	AGJ98699.1 Elongation factor Tu 1 [Wolbachia endosymbiont of Drosophila simulans wNo], AGJ99213.1 Elongation factor Tu 2 [Wolbachia endosymbiont of Drosophila simulans wNo]	CAQ54669.1 translation elongation factor Tu [Wolbachia endosymbiont of Culex quinquefasciatus Pel], CAQ55272.1 translation elongation factor tu [Wolbachia endosymbiont of Culex quinquefasciatus Pel]	WP_010962309.1 MULTISPECIES_ elongation factor Tu [Wolbachia], WP_010962759.1 MULTISPECIES_ elongation factor Tu [Wolbachia]	WP_026097278.1 elongation factor Tu_ partial [Wolbachia pipientis]	WP_047758937.1 elongation factor Tu [Wolbachia endosymbiont of Armadillidium vulgare]	wFol_00480 tuf Elongation factor Tu 62435_63607 forward MW_42696, wFol_01260 tuf Elongation factor Tu 164456_165628 forward MW_42669	OCA06304.1 translation elongation factor Tu [Wolbachia endosymbiont of Trichogramma pretiosum], OCA07013.1 translation elongation factor Tu [Wolbachia endosymbiont of Trichogramma pretiosum]	wLcla05040 tuf Elongation factor Tu 452460_453632 reverse MW_42582, wLcla11390 tuf Elongation factor Tu 1052375_1053547 forward MW_42582	ONI56874.1 elongation factor Tu_ partial [Wolbachia pipientis wUni]	OEY86795.1 translation elongation factor Tu [Wolbachia pipientis]		OG0000019	2	2	2	2	2	2	2	2	2	2	2	1	1	2	2	2	1	1		1.77778	0.427793		OG0000019	0.519462	0.519462	0.519462	0.519462	0.519462	0.519462
OG0000020					CDR78702.1 prophage LambdaW5_ baseplate assembly protein J_Uncharacterized homolog of phage Mu protein gp47_Baseplate J-like protein [Wolbachia], CDR79021.1 prophage LambdaW1_ baseplate assembly protein J_Uncharacterized homolog of phage Mu protein gp47_Baseplate J-like protein [Wolbachia]	AAS14019.1 prophage LambdaW1_ baseplate assembly protein J_ putative [Wolbachia endosymbiont of Drosophila melanogaster], AAS14338.1 prophage LambdaW5_ baseplate assembly protein J_ putative [Wolbachia endosymbiont of Drosophila melanogaster]	AGJ99731.1 Baseplate assembly protein J_ putative [Wolbachia endosymbiont of Drosophila simulans wHa], AGJ99814.1 Baseplate assembly protein J_ putative [Wolbachia endosymbiont of Drosophila simulans wHa]	ACN95324.1 baseplate assembly protein J_ putative [Wolbachia sp. wRi], ACN95462.1 baseplate assembly protein J_ putative [Wolbachia sp. wRi], ACN95718.1 baseplate assembly protein J_ putative [Wolbachia sp. wRi], ACN95931.1 baseplate assembly protein J_ putative [Wolbachia sp. wRi]	AGJ98558.1 Baseplate assembly protein GpJ [Wolbachia endosymbiont of Drosophila simulans wNo], AGJ99131.1 Baseplate assembly protein GpJ [Wolbachia endosymbiont of Drosophila simulans wNo], AGJ99384.1 Baseplate assembly protein GpJ [Wolbachia endosymbiont of Drosophila simulans wNo]	CAQ54351.1 baseplate assembly protein GpJ [Wolbachia endosymbiont of Culex quinquefasciatus Pel], CAQ54410.1 baseplate assembly protein GpJ [Wolbachia endosymbiont of Culex quinquefasciatus Pel], CAQ54443.1 baseplate assembly protein GpJ [Wolbachia endosymbiont of Culex quinquefasciatus Pel], CAQ54524.1 baseplate assembly protein GpJ [Wolbachia endosymbiont of Culex quinquefasciatus Pel]	WP_038198573.1 baseplate assembly protein J [Wolbachia pipientis]	WP_019236392.1 baseplate assembly protein J [Wolbachia pipientis], WP_019236412.1 baseplate assembly protein J [Wolbachia pipientis], WP_019236497.1 baseplate assembly protein J [Wolbachia pipientis], WP_019236524.1 baseplate assembly protein J [Wolbachia pipientis]	WP_047759244.1 baseplate assembly protein J [Wolbachia endosymbiont of Armadillidium vulgare], WP_047759347.1 baseplate assembly protein J [Wolbachia endosymbiont of Armadillidium vulgare], WP_047759501.1 baseplate assembly protein J [Wolbachia endosymbiont of Armadillidium vulgare], WP_047759654.1 baseplate assembly protein J [Wolbachia endosymbiont of Armadillidium vulgare]	wFol_05900 wFol_05900 Putative phage baseplate assembly protein J 695755_696564 forward MW_30572, wFol_06180 wFol_06180 Putative phage baseplate assembly protein J 725023_725826 forward MW_30146, wFol_09340 wFol_09340 Baseplate assembly protein J 1118280_1119089 reverse MW_30422, wFol_10520 wFol_10520 Baseplate assembly protein J 1248313_1249116 forward MW_30146			ONI55811.1 hypothetical protein N500_1132 [Wolbachia pipientis wUni]			OG0000020	0	0	0	0	2	2	2	4	3	4	1	4	4	4	0	0	1	0		1.72222	1.7083		OG0000020	-1.00815	-1.00815	-1.00815	-1.00815	0.162604	0.162604
OG0000021					CDR78700.1 Putative phage related protein_Uncharacterized conserved protein_PAAR motif [Wolbachia], CDR79023.1 Putative phage related protein_Uncharacterized conserved protein_PAAR motif [Wolbachia]	AAS14017.1 hypothetical protein WD_0281 [Wolbachia endosymbiont of Drosophila melanogaster], AAS14340.1 hypothetical protein WD_0641 [Wolbachia endosymbiont of Drosophila melanogaster]	AGJ99729.1 hypothetical protein wHa_02550 [Wolbachia endosymbiont of Drosophila simulans wHa], AGJ99816.1 hypothetical protein wHa_03450 [Wolbachia endosymbiont of Drosophila simulans wHa]	ACN95326.1 hypothetical protein WRi_005490 [Wolbachia sp. wRi], ACN95464.1 hypothetical protein WRi_007100 [Wolbachia sp. wRi], ACN95720.1 hypothetical protein WRi_010150 [Wolbachia sp. wRi]	AGJ98559.1 hypothetical protein wNo_01140 [Wolbachia endosymbiont of Drosophila simulans wNo], AGJ99129.1 hypothetical protein wNo_07310 [Wolbachia endosymbiont of Drosophila simulans wNo]	CAQ54353.1 Putative phage related protein [Wolbachia endosymbiont of Culex quinquefasciatus Pel], CAQ54412.1 Putative phage related protein [Wolbachia endosymbiont of Culex quinquefasciatus Pel], CAQ54441.1 Putative phage related protein [Wolbachia endosymbiont of Culex quinquefasciatus Pel], CAQ54526.1 Putative phage related protein [Wolbachia endosymbiont of Culex quinquefasciatus Pel], CAQ5540…	WP_010082109.1 MULTISPECIES_ hypothetical protein [Wolbachia]	WP_015587734.1 MULTISPECIES_ hypothetical protein [Wolbachia], WP_019236394.1 hypothetical protein [Wolbachia pipientis], WP_019236415.1 hypothetical protein [Wolbachia pipientis]	WP_047759246.1 hypothetical protein [Wolbachia endosymbiont of Armadillidium vulgare], WP_047759341.1 hypothetical protein [Wolbachia endosymbiont of Armadillidium vulgare], WP_047759357.1 hypothetical protein [Wolbachia endosymbiont of Armadillidium vulgare], WP_047759503.1 hypothetical protein [Wolbachia endosymbiont of Armadillidium vulgare], WP_047759655.1 hypothetical protein [Wolbachia endo…	wFol_05880 wFol_05880 PAAR-family protein 695156_695410 forward MW_8859, wFol_06160 wFol_06160 PAAR-family protein 724425_724679 forward MW_8621, wFol_09360 wFol_09360 PAAR family protein 1119434_1119688 reverse MW_8871, wFol_10500 wFol_10500 PAAR-family protein 1247715_1247969 forward MW_8621						OG0000021	0	0	0	0	2	2	2	3	2	5	1	3	5	4	0	0	0	0		1.61111	1.78684		OG0000021	-0.901652	-0.901652	-0.901652	-0.901652	0.21764	0.21764
OG0000022					CDR78701.1 baseplate assembly protein W_ putative_Gene 25-like lysozyme [Wolbachia], CDR79022.1 prophage LambdaW1_ baseplate assembly protein W_Gene 25-like lysozyme [Wolbachia]	AAS14018.1 prophage LambdaW1_ baseplate assembly protein W_ putative [Wolbachia endosymbiont of Drosophila melanogaster], AAS14339.1 prophage LambdaW5_ baseplate assembly protein W_ putative [Wolbachia endosymbiont of Drosophila melanogaster]	AGJ99730.1 Baseplate assembly protein W_ putative [Wolbachia endosymbiont of Drosophila simulans wHa], AGJ99815.1 Baseplate assembly protein W_ putative [Wolbachia endosymbiont of Drosophila simulans wHa]	ACN95325.1 baseplate assembly protein W_ putative [Wolbachia sp. wRi], ACN95463.1 baseplate assembly protein W_ putative [Wolbachia sp. wRi], ACN95719.1 baseplate assembly protein W_ putative [Wolbachia sp. wRi], ACN95932.1 baseplate assembly protein W_ putative [Wolbachia sp. wRi]	AGJ99130.1 Baseplate assembly protein GpW_ putative [Wolbachia endosymbiont of Drosophila simulans wNo], AGJ99383.1 Baseplate assembly protein GpW_ putative [Wolbachia endosymbiont of Drosophila simulans wNo]	CAQ54352.1 Baseplate assembly protein GpW [Wolbachia endosymbiont of Culex quinquefasciatus Pel], CAQ54411.1 baseplate assembly protein GpW [Wolbachia endosymbiont of Culex quinquefasciatus Pel], CAQ54442.1 baseplate assembly protein GpW [Wolbachia endosymbiont of Culex quinquefasciatus Pel], CAQ54525.1 baseplate assembly protein GpW [Wolbachia endosymbiont of Culex quinquefasciatus Pel]	WP_015588922.1 MULTISPECIES_ baseplate assembly protein [Wolbachia]	WP_019236296.1 phage baseplate protein_ partial [Wolbachia pipientis], WP_019236393.1 phage baseplate protein [Wolbachia pipientis], WP_019236498.1 phage baseplate protein_ partial [Wolbachia pipientis]	WP_015588269.1 baseplate assembly protein [Wolbachia endosymbiont of Drosophila simulans], WP_047759245.1 baseplate assembly protein W [Wolbachia endosymbiont of Armadillidium vulgare], WP_047759359.1 baseplate assembly protein W [Wolbachia endosymbiont of Armadillidium vulgare], WP_047759502.1 baseplate assembly protein W [Wolbachia endosymbiont of Armadillidium vulgare]	wFol_05890 wFol_05890 Putative phage baseplate assembly protein GPW 695417_695752 forward MW_12687, wFol_06170 wFol_06170 Putative phage baseplate assembly protein GPW 724685_725020 forward MW_12681, wFol_09350 wFol_09350 Baseplate assembly protein GpW 1119092_1119427 reverse MW_12687, wFol_10510 wFol_10510 Baseplate assembly protein W 1247975_1248310 forward MW_12681			ONI55812.1 baseplate assembly protein W [Wolbachia pipientis wUni]			OG0000022	0	0	0	0	2	2	2	4	2	4	1	3	4	4	0	0	1	0		1.61111	1.61387		OG0000022	-0.998291	-0.998291	-0.998291	-0.998291	0.240967	0.240967
OG0000023			gi|58584523|ref|YP_198096.1| Predicted protein_ WF-1 [Wolbachia endosymbiont strain TRS of Brugia malayi], gi|58584661|ref|YP_198234.1| Predicted protein_ WF-1 [Wolbachia endosymbiont strain TRS of Brugia malayi]	BAP00134.1 ankyrin repeat-containing protein [Wolbachia endosymbiont of Cimex lectularius], BAP00247.1 putative uncharacterized protein [Wolbachia endosymbiont of Cimex lectularius]	CDR78602.1 ankyrin repeat domain protein [Wolbachia]	AAS13977.1 hypothetical protein WD_0233 [Wolbachia endosymbiont of Drosophila melanogaster], AAS13978.1 hypothetical protein WD_0234 [Wolbachia endosymbiont of Drosophila melanogaster]		ACN95053.1 hypothetical protein WRi_002220 [Wolbachia sp. wRi]	AGJ99430.1 hypothetical protein wNo_10610 [Wolbachia endosymbiont of Drosophila simulans wNo]	CAQ55028.1 hypothetical protein WP0920 [Wolbachia endosymbiont of Culex quinquefasciatus Pel]		WP_019236482.1 hypothetical protein [Wolbachia pipientis], WP_019236490.1 hypothetical protein [Wolbachia pipientis], WP_019236547.1 hypothetical protein [Wolbachia pipientis], WP_019236589.1 hypothetical protein [Wolbachia pipientis], WP_019236847.1 hypothetical protein_ partial [Wolbachia pipientis]	WP_047758968.1 hypothetical protein [Wolbachia endosymbiont of Armadillidium vulgare], WP_047759142.1 hypothetical protein [Wolbachia endosymbiont of Armadillidium vulgare], WP_047759353.1 hypothetical protein [Wolbachia endosymbiont of Armadillidium vulgare], WP_047759651.1 hypothetical protein [Wolbachia endosymbiont of Armadillidium vulgare]		OCA05798.1 hypothetical protein wTpre_117 [Wolbachia endosymbiont of Trichogramma pretiosum], OCA06724.1 hypothetical protein wTpre_1067 [Wolbachia endosymbiont of Trichogramma pretiosum], OCA06725.1 hypothetical protein wTpre_1068 [Wolbachia endosymbiont of Trichogramma pretiosum], OCA06726.1 hypothetical protein wTpre_1069 [Wolbachia endosymbiont of Trichogramma pretiosum], OCA06727.1 hypotheti…	wLcla08070 wLcla08070 Uncharacterized protein 737463_738707 forward MW_47943	ONI56660.1 hypothetical protein N500_0246 [Wolbachia pipientis wUni], ONI56661.1 protein_ WF-1 [Wolbachia pipientis wUni]			OG0000023	0	0	2	2	1	2	0	1	1	1	0	5	4	0	6	1	2	0		1.55556	1.78958		OG0000023	-0.869227	-0.869227	0.248351	0.248351	-0.310438	0.248351
OG0000024					CDR78698.1 Putative phage related protein [Wolbachia], CDR79025.1 Putative phage related protein [Wolbachia]	AAS14016.1 conserved hypothetical protein [Wolbachia endosymbiont of Drosophila melanogaster], AAS14342.1 conserved hypothetical protein [Wolbachia endosymbiont of Drosophila melanogaster]	AGJ99727.1 hypothetical protein wHa_02530 [Wolbachia endosymbiont of Drosophila simulans wHa], AGJ99818.1 hypothetical protein wHa_03470 [Wolbachia endosymbiont of Drosophila simulans wHa]	ACN95328.1 hypothetical protein WRi_005510 [Wolbachia sp. wRi], ACN95466.1 hypothetical protein WRi_007120 [Wolbachia sp. wRi], ACN95722.1 hypothetical protein WRi_010170 [Wolbachia sp. wRi]	AGJ98561.1 hypothetical protein wNo_01160 [Wolbachia endosymbiont of Drosophila simulans wNo], AGJ99127.1 hypothetical protein wNo_07290 [Wolbachia endosymbiont of Drosophila simulans wNo]	CAQ54355.1 Putative phage related protein [Wolbachia endosymbiont of Culex quinquefasciatus Pel], CAQ54414.1 Putative phage related protein [Wolbachia endosymbiont of Culex quinquefasciatus Pel], CAQ54439.1 Putative phage related protein [Wolbachia endosymbiont of Culex quinquefasciatus Pel], CAQ54528.1 putative phage related protein [Wolbachia endosymbiont of Culex quinquefasciatus Pel], CAQ5540…	WP_038198571.1 phage related protein [Wolbachia pipientis]	WP_015588266.1 MULTISPECIES_ hypothetical protein [Wolbachia], WP_019236294.1 hypothetical protein [Wolbachia pipientis], WP_019236417.1 hypothetical protein [Wolbachia pipientis], WP_019236987.1 hypothetical protein [Wolbachia pipientis]	WP_015588266.1 MULTISPECIES_ hypothetical protein [Wolbachia], WP_047759248.1 phage related protein [Wolbachia endosymbiont of Armadillidium vulgare], WP_047759345.1 phage related protein [Wolbachia endosymbiont of Armadillidium vulgare], WP_047759505.1 phage related protein [Wolbachia endosymbiont of Armadillidium vulgare]	wFol_05860 wFol_05860 Putative phage related protein 694232_694705 forward MW_17350, wFol_06140 wFol_06140 Putative phage related protein 723504_723974 forward MW_17504, wFol_09380 wFol_09380 Putative phage related protein 1120139_1120612 reverse MW_17460						OG0000024	0	0	0	0	2	2	2	3	2	5	1	4	4	3	0	0	0	0		1.55556	1.6881		OG0000024	-0.921484	-0.921484	-0.921484	-0.921484	0.263281	0.263281
OG0000025					CDR78703.1 Putative phage related protein_Bacteriophage P2-related tail formation protein_Phage tail protein _Tail_P2_I_ [Wolbachia], CDR78704.1 Putative phage related protein [Wolbachia], CDR79019.1 Putative phage related protein [Wolbachia], CDR79020.1 Putative phage related protein_Phage tail protein _Tail_P2_I_ [Wolbachia]	AAS14020.1 conserved hypothetical protein [Wolbachia endosymbiont of Drosophila melanogaster], AAS14337.1 conserved hypothetical protein [Wolbachia endosymbiont of Drosophila melanogaster]	AGJ99732.1 Putative phage tail protein [Wolbachia endosymbiont of Drosophila simulans wHa], AGJ99813.1 Putative phage tail protein [Wolbachia endosymbiont of Drosophila simulans wHa]	ACN95323.1 hypothetical protein WRi_005460 [Wolbachia sp. wRi], ACN95461.1 hypothetical protein WRi_007070 [Wolbachia sp. wRi], ACN95717.1 hypothetical protein WRi_010120 [Wolbachia sp. wRi], ACN95930.1 hypothetical protein WRi_012470 [Wolbachia sp. wRi]	AGJ98557.1 Putative phage tail protein [Wolbachia endosymbiont of Drosophila simulans wNo], AGJ99132.1 Putative phage tail protein [Wolbachia endosymbiont of Drosophila simulans wNo], AGJ99385.1 Putative phage tail protein [Wolbachia endosymbiont of Drosophila simulans wNo]	CAQ54350.1 Putative phage related protein _fragment_ [Wolbachia endosymbiont of Culex quinquefasciatus Pel], CAQ54409.1 Putative phage related protein [Wolbachia endosymbiont of Culex quinquefasciatus Pel], CAQ54444.1 Putative phage related protein [Wolbachia endosymbiont of Culex quinquefasciatus Pel], CAQ54523.1 Putative phage related protein [Wolbachia endosymbiont of Culex quinquefasciatus Pe…	WP_015588924.1 MULTISPECIES_ phage tail protein [Wolbachia]	WP_019236411.1 hypothetical protein [Wolbachia pipientis], WP_019236496.1 hypothetical protein [Wolbachia pipientis]	WP_047759242.1 phage tail protein [Wolbachia endosymbiont of Armadillidium vulgare], WP_047759348.1 phage tail protein [Wolbachia endosymbiont of Armadillidium vulgare], WP_047759653.1 phage tail protein [Wolbachia endosymbiont of Armadillidium vulgare]	wFol_06190 wFol_06190 Putative phage tail protein 725826_726977 forward MW_44857, wFol_10530 wFol_10530 Putative phage tail protein 1249116_1250267 forward MW_44857			ONI55808.1 phage tail protein I domain protein_ partial [Wolbachia pipientis wUni]			OG0000025	0	0	0	0	4	2	2	4	3	4	1	2	3	2	0	0	1	0		1.55556	1.54243		OG0000025	-1.00851	-1.00851	-1.00851	-1.00851	1.5848	0.288146
OG0000026			gi|58584453|ref|YP_198026.1| hypothetical protein Wbm0193 [Wolbachia endosymbiont strain TRS of Brugia malayi], gi|58584458|ref|YP_198031.1| hypothetical protein Wbm0198 [Wolbachia endosymbiont strain TRS of Brugia malayi]		CDR78759.1 hypothetical protein WPAU_0368 [Wolbachia]	AAS14064.1 hypothetical protein WD_0332 [Wolbachia endosymbiont of Drosophila melanogaster]	AGJ99961.1 hypothetical protein wHa_05090 [Wolbachia endosymbiont of Drosophila simulans wHa]	ACN95241.1 hypothetical protein WRi_004540 [Wolbachia sp. wRi]	AGJ98488.1 hypothetical protein wNo_00270 [Wolbachia endosymbiont of Drosophila simulans wNo], AGJ98489.1 hypothetical protein wNo_00280 [Wolbachia endosymbiont of Drosophila simulans wNo], AGJ98528.1 hypothetical protein wNo_00730 [Wolbachia endosymbiont of Drosophila simulans wNo]	CAQ54144.1 hypothetical protein WP0035 [Wolbachia endosymbiont of Culex quinquefasciatus Pel], CAQ54206.1 Hypothetical protein WP0098 [Wolbachia endosymbiont of Culex quinquefasciatus Pel]	WP_038198642.1 hypothetical protein [Wolbachia pipientis]	WP_019236320.1 hypothetical protein [Wolbachia pipientis], WP_019236339.1 hypothetical protein [Wolbachia pipientis]	WP_047759075.1 hypothetical protein [Wolbachia endosymbiont of Armadillidium vulgare], WP_047759848.1 hypothetical protein_ partial [Wolbachia endosymbiont of Armadillidium vulgare]	wFol_07800 wFol_07800 Ankyrin repeat domain protein 928295_930838 forward MW_94422	OCA05925.1 hypothetical protein wTpre_243 [Wolbachia endosymbiont of Trichogramma pretiosum], OCA05926.1 hypothetical protein wTpre_244 [Wolbachia endosymbiont of Trichogramma pretiosum], OCA05927.1 hypothetical protein wTpre_245 [Wolbachia endosymbiont of Trichogramma pretiosum], OCA05928.1 hypothetical protein wTpre_246 [Wolbachia endosymbiont of Trichogramma pretiosum], OCA05929.1 hypothetical…	wLcla01180 wLcla01180 Uncharacterized protein 95157_97418 reverse MW_85885	ONI56404.1 hypothetical protein N500_0513_ partial [Wolbachia pipientis wUni], ONI56409.1 hypothetical protein N500_0512_ partial [Wolbachia pipientis wUni]	OEY86731.1 hypothetical protein BIY23_02675 [Wolbachia pipientis], OEY87002.1 hypothetical protein BIY23_00710 [Wolbachia pipientis]		OG0000026	0	0	2	0	1	1	1	1	3	2	1	2	2	1	6	1	2	2		1.55556	1.38148		OG0000026	-1.126	-1.126	0.321715	-1.126	-0.402144	-0.402144
OG0000027			gi|58584422|ref|YP_197995.1| hypothetical protein Wbm0162 [Wolbachia endosymbiont strain TRS of Brugia malayi], gi|58584423|ref|YP_197996.1| hypothetical protein Wbm0163 [Wolbachia endosymbiont strain TRS of Brugia malayi], gi|58584425|ref|YP_197998.1| hypothetical protein Wbm0165 [Wolbachia endosymbiont strain TRS of Brugia malayi]	BAO99637.1 phage prohead protease [Wolbachia endosymbiont of Cimex lectularius], BAO99638.1 putative uncharacterized protein [Wolbachia endosymbiont of Cimex lectularius]	CDR78869.1 hypothetical protein WPAU_0481 [Wolbachia], CDR78871.1 phage prohead protease_phage prohead protease_ HK97 family_Caudovirus prohead protease [Wolbachia]	AAS14168.1 hypothetical protein WD_0445 [Wolbachia endosymbiont of Drosophila melanogaster], AAS14169.1 hypothetical protein WD_0446 [Wolbachia endosymbiont of Drosophila melanogaster], AAS14170.1 phage prohead protease [Wolbachia endosymbiont of Drosophila melanogaster]	AGJ99801.1 hypothetical protein wHa_03300 [Wolbachia endosymbiont of Drosophila simulans wHa]	ACN95118.1 phage prohead protease [Wolbachia sp. wRi]	AGJ99366.1 hypothetical protein wNo_09900 [Wolbachia endosymbiont of Drosophila simulans wNo], AGJ99367.1 hypothetical protein wNo_09910 [Wolbachia endosymbiont of Drosophila simulans wNo], AGJ99368.1 Phage prohead protease [Wolbachia endosymbiont of Drosophila simulans wNo]	CAQ54270.1 phage prohead protease [Wolbachia endosymbiont of Culex quinquefasciatus Pel], CAQ54271.1 Hypothetical protein WP0163 [Wolbachia endosymbiont of Culex quinquefasciatus Pel]	WP_038198768.1 hypothetical protein [Wolbachia pipientis], WP_038198770.1 peptidase [Wolbachia pipientis]	WP_007302694.1 MULTISPECIES_ peptidase [Wolbachia], WP_019236366.1 hypothetical protein [Wolbachia pipientis]	WP_047758710.1 peptidase [Wolbachia endosymbiont of Armadillidium vulgare], WP_047758711.1 hypothetical protein [Wolbachia endosymbiont of Armadillidium vulgare]	wFol_07850 wFol_07850 Phage prohead protease 939316_939849 forward MW_19538, wFol_07860 wFol_07860 Putative helicase_ superfamily 1/2 940073_944182 forward MW_156499	OCA06044.1 hypothetical protein wTpre_366 [Wolbachia endosymbiont of Trichogramma pretiosum], OCA06045.1 phage prohead protease_ HK97 family [Wolbachia endosymbiont of Trichogramma pretiosum]		ONI56493.1 hypothetical protein N500_0414_ partial [Wolbachia pipientis wUni]			OG0000027	0	0	3	2	2	3	1	1	3	2	2	2	2	2	2	0	1	0		1.55556	1.04162		OG0000027	-1.4934	-1.4934	1.38673	0.426687	0.426687	1.38673
OG0000028			gi|58584820|ref|YP_198393.1| hypothetical protein Wbm0563 [Wolbachia endosymbiont strain TRS of Brugia malayi], gi|58584821|ref|YP_198394.1| hypothetical protein Wbm0564 [Wolbachia endosymbiont strain TRS of Brugia malayi], gi|58584822|ref|YP_198395.1| hypothetical protein Wbm0565 [Wolbachia endosymbiont strain TRS of Brugia malayi]	BAO99588.1 ankyrin repeat-containing protein [Wolbachia endosymbiont of Cimex lectularius]	CDR79131.1 ankyrin repeat-containing protein_Ankyrin repeats _3 copies_ [Wolbachia]	AAS14443.1 hypothetical protein WD_0753 [Wolbachia endosymbiont of Drosophila melanogaster], AAS14444.1 ankyrin repeat domain protein [Wolbachia endosymbiont of Drosophila melanogaster]	AGK00081.1 Ankyrin repeat domain protein [Wolbachia endosymbiont of Drosophila simulans wHa]	ACN95476.1 ankyrin repeat domain protein [Wolbachia sp. wRi]	AGJ98480.1 Ankyrin repeat domain protein [Wolbachia endosymbiont of Drosophila simulans wNo]	CAQ54218.1 Hypothetical protein WP0110 [Wolbachia endosymbiont of Culex quinquefasciatus Pel], CAQ54220.1 ankyrin repeat domain protein [Wolbachia endosymbiont of Culex quinquefasciatus Pel]		WP_019236312.1 MULTISPECIES_ hypothetical protein [Wolbachia], WP_019236359.1 hypothetical protein [Wolbachia pipientis]	WP_047758843.1 hypothetical protein [Wolbachia endosymbiont of Armadillidium vulgare]	wFol_06760 wFol_06760 Ankyrin repeat domain protein 802088_803296 forward MW_45146, wFol_07970 wFol_07970 Ankyrin repeat domain protein 958998_960230 reverse MW_46035, wFol_12580 wFol_12580 Ankyrin repeat domain protein 1485073_1486242 forward MW_43533	OCA05915.1 hypothetical protein wTpre_233 [Wolbachia endosymbiont of Trichogramma pretiosum], OCA05916.1 ankyrin repeat family protein [Wolbachia endosymbiont of Trichogramma pretiosum], OCA05917.1 putative membrane protein [Wolbachia endosymbiont of Trichogramma pretiosum], OCA05938.1 hypothetical protein wTpre_255 [Wolbachia endosymbiont of Trichogramma pretiosum], OCA06064.1 ankyrin repeat fam…		ONI56315.1 ankyrin domain protein [Wolbachia pipientis wUni], ONI56317.1 ankyrin repeat family protein [Wolbachia pipientis wUni]			OG0000028	0	0	3	1	1	2	1	1	1	2	0	2	1	3	8	0	2	0		1.55556	1.88562		OG0000028	-0.824958	-0.824958	0.766032	-0.294628	-0.294628	0.235702
OG0000029					CDR79238.1 Putative transposase_Transposase and inactivated derivatives_Transposase [Wolbachia], CDR79361.1 Putative transposase_Transposase and inactivated derivatives_Transposase [Wolbachia], CDR79377.1 Putative transposase_Transposase and inactivated derivatives_Transposase [Wolbachia], CDR79390.1 Putative transposase_Transposase and inactivated derivatives_Transposase [Wolbachia]	AAS14724.1 conserved domain protein [Wolbachia endosymbiont of Drosophila melanogaster]				CAQ54137.1 Putative transposase [Wolbachia endosymbiont of Culex quinquefasciatus Pel], CAQ54267.1 Putative transposase [Wolbachia endosymbiont of Culex quinquefasciatus Pel], CAQ54376.1 Putative transposase [Wolbachia endosymbiont of Culex quinquefasciatus Pel]	WP_022626382.1 MULTISPECIES_ transposase [Wolbachia], WP_038199171.1 transposase [Wolbachia pipientis], WP_038199353.1 transposase [Wolbachia pipientis]	WP_019078706.1 MULTISPECIES_ hypothetical protein [Wolbachia], WP_019236575.1 transposase [Wolbachia pipientis], WP_019236998.1 MULTISPECIES_ hypothetical protein [Wolbachia], WP_026097279.1 MULTISPECIES_ transcriptional regulator [Wolbachia]	WP_047759050.1 hypothetical protein [Wolbachia endosymbiont of Armadillidium vulgare], WP_047759489.1 transposase_ partial [Wolbachia endosymbiont of Armadillidium vulgare]	wFol_04160 wFol_04160 Transposase_ IS630 family_ ORFA 512553_512912 forward MW_14216, wFol_07510 wFol_07510 Transposase_ IS630 family_ ORFA 894203_894562 reverse MW_14216, wFol_08300 wFol_08300 Transposase_ IS630 family_ ORFA 992811_993170 reverse MW_14216	OCA05785.1 hypothetical protein wTpre_104 [Wolbachia endosymbiont of Trichogramma pretiosum]	wLcla00420 wLcla00420 Transposase_ IS630 family 32837_33016 reverse MW_6770, wLcla01250 wLcla01250 Uncharacterised protein 102011_102109 forward MW_3715, wLcla02180 wLcla02180 Transposase_ IS630 family 187968_188147 forward MW_6770, wLcla06670 wLcla06670 Transposase_ IS630 family_ Orf1 614818_614997 forward MW_6770	ONI56112.1 transposase family protein [Wolbachia pipientis wUni]	OEY86916.1 hypothetical protein BIY23_00205 [Wolbachia pipientis], OEY87168.1 hypothetical protein BIY23_01685 [Wolbachia pipientis]		OG0000029	0	0	0	0	4	1	0	0	0	3	3	4	2	3	1	4	1	2		1.55556	1.58011		OG0000029	-0.984463	-0.984463	-0.984463	-0.984463	1.54701	-0.351594
OG0000030			gi|58584294|ref|YP_197867.1| hypothetical protein Wbm0033 [Wolbachia endosymbiont strain TRS of Brugia malayi], gi|58584723|ref|YP_198296.1| hypothetical protein Wbm0466 [Wolbachia endosymbiont strain TRS of Brugia malayi]	BAO99841.1 DnaJ domain protein [Wolbachia endosymbiont of Cimex lectularius], BAP00054.1 chaperone protein DnaJ [Wolbachia endosymbiont of Cimex lectularius]	CDR79393.1 DnaJ domain-containing protein_Dna-J like membrane chaperone protein_Preprotein translocase subunit Sec63_chaperone protein DnaJ_DnaJ domain [Wolbachia], CDR79395.1 DnaJ domain protein_Dna-J like membrane chaperone protein_Preprotein translocase subunit Sec63_DnaJ domain [Wolbachia]	AAS14727.1 DnaJ domain protein [Wolbachia endosymbiont of Drosophila melanogaster], AAS14729.1 DnaJ domain protein [Wolbachia endosymbiont of Drosophila melanogaster]	AGK00314.1 DnaJ domain protein [Wolbachia endosymbiont of Drosophila simulans wHa]	ACN95804.1 DnaJ domain protein [Wolbachia sp. wRi], ACN95806.1 DnaJ domain protein [Wolbachia sp. wRi]	AGJ98818.1 DnaJ domain protein [Wolbachia endosymbiont of Drosophila simulans wNo], AGJ99169.1 DnaJ domain protein [Wolbachia endosymbiont of Drosophila simulans wNo]	CAQ54454.1 ankyrin repeat domain protein [Wolbachia endosymbiont of Culex quinquefasciatus Pel], CAQ54455.1 ankyrin repeat domain protein [Wolbachia endosymbiont of Culex quinquefasciatus Pel], CAQ54836.1 DnaJ domain protein [Wolbachia endosymbiont of Culex quinquefasciatus Pel]	WP_022626406.1 MULTISPECIES_ molecular chaperone DnaJ [Wolbachia], WP_038199356.1 molecular chaperone DnaJ [Wolbachia pipientis]	WP_007302145.1 MULTISPECIES_ molecular chaperone DnaJ [Wolbachia], WP_019236297.1 hypothetical protein [Wolbachia pipientis]	WP_047759775.1 molecular chaperone DnaJ [Wolbachia endosymbiont of Armadillidium vulgare]	wFol_04500 wFol_04500 DnaJ and ankyrin repeat domain protein 548923_550092 forward MW_44099, wFol_05160 wFol_05160 DnaJ domain protein 630587_630958 forward MW_14313, wFol_12700 wFol_12700 DnaJ and ankyrin repeat domain protein 1498014_1500041 reverse MW_76909	OCA06837.1 dnaJ domain protein [Wolbachia endosymbiont of Trichogramma pretiosum]	wLcla09800 wLcla09800 DnaJ domain protein 891944_892303 forward MW_13684	ONI55951.1 dnaJ domain protein [Wolbachia pipientis wUni]	OEY87169.1 hypothetical protein BIY23_01690 [Wolbachia pipientis]		OG0000030	0	0	2	2	2	2	1	2	2	3	2	2	1	3	1	1	1	1		1.55556	0.855585		OG0000030	-1.81812	-1.81812	0.519462	0.519462	0.519462	0.519462
OG0000031					CDR78461.1 transposase_Uncharacterized homolog of phage Mu protein gp47_Integrase core domain [Wolbachia]	AAS13925.1 transposase_ putative [Wolbachia endosymbiont of Drosophila melanogaster]	AGJ99585.1 Transposase [Wolbachia endosymbiont of Drosophila simulans wHa]	ACN94935.1 transposase [Wolbachia sp. wRi]			WP_038199693.1 integrase [Wolbachia pipientis]			wFol_01840 wFol_01840 Transposase_ IS481 family 208998_209969 forward MW_38416, wFol_02020 wFol_02020 Transposase_ IS481 family 230103_231074 reverse MW_38504, wFol_02060 wFol_02060 Transposase_ IS481 family 234594_235565 forward MW_38504, wFol_02240 wFol_02240 Transposase_ IS481 family 260870_261841 forward MW_38504, wFol_02870 wFol_02870 Transposase_ IS481 family 342192_343163 reverse MW_38416,…			ONI56786.1 integrase core domain protein [Wolbachia pipientis wUni]	OEY87093.1 hypothetical protein BIY23_01235 [Wolbachia pipientis]		OG0000031	0	0	0	0	1	1	1	1	0	0	1	0	0	20	0	0	1	1		1.5	4.64315		OG0000031	-0.323057	-0.323057	-0.323057	-0.323057	-0.107686	-0.107686
OG0000032					CDR78682.1 Putative Holliday junction resolvasome_ endonuclease subunit [Wolbachia], CDR79044.1 Putative phage related protein [Wolbachia]	AAS14002.1 conserved hypothetical protein_ interruption-C [Wolbachia endosymbiont of Drosophila melanogaster]	AGJ99701.1 Putative holliday junction resolvase RuvC [Wolbachia endosymbiont of Drosophila simulans wHa], AGJ99714.1 Putative holliday junction resolvase RuvC [Wolbachia endosymbiont of Drosophila simulans wHa]	ACN95342.1 Putative Holliday junction resolvasome_ endonuclease subunit [Wolbachia sp. wRi], ACN95512.1 hypothetical protein WRi_007630 [Wolbachia sp. wRi], ACN95736.1 Holliday junction resolvasome_ endonuclease subunit [Wolbachia sp. wRi]	AGJ98571.1 hypothetical protein wNo_01270 [Wolbachia endosymbiont of Drosophila simulans wNo], AGJ99292.1 hypothetical protein wNo_09040 [Wolbachia endosymbiont of Drosophila simulans wNo]	CAQ54367.1 Putative phage related protein [Wolbachia endosymbiont of Culex quinquefasciatus Pel], CAQ54426.1 Putative phage related protein [Wolbachia endosymbiont of Culex quinquefasciatus Pel], CAQ54538.1 putative phage related protein [Wolbachia endosymbiont of Culex quinquefasciatus Pel], CAQ55419.1 putative phage related protein [Wolbachia endosymbiont of Culex quinquefasciatus Pel]		WP_019236406.1 hypothetical protein_ partial [Wolbachia pipientis], WP_019236429.1 hypothetical protein [Wolbachia pipientis], WP_019236500.1 hypothetical protein_ partial [Wolbachia pipientis], WP_026097221.1 Holliday junction DNA helicase [Wolbachia pipientis]	WP_047759131.1 Holliday junction resolvase [Wolbachia endosymbiont of Armadillidium vulgare], WP_047759173.1 Holliday junction resolvase [Wolbachia endosymbiont of Armadillidium vulgare], WP_047759258.1 Holliday junction resolvase [Wolbachia endosymbiont of Armadillidium vulgare], WP_047759513.1 Holliday junction resolvase [Wolbachia endosymbiont of Armadillidium vulgare]	wFol_05720 wFol_05720 Putative holliday junction resolvase RuvC 682428_682916 forward MW_17973, wFol_06020 wFol_06020 Putative holliday junction resolvase RuvC 712200_712688 forward MW_17944, wFol_09510 wFol_09510 Putative holliday junction resolvase RuvC 1132171_1132659 reverse MW_18189, wFol_10260 wFol_10260 Ribonuclease H-like superfamily protein 1221816_1222334 reverse MW_19338			ONI56238.1 holliday junction resolvasome [Wolbachia pipientis wUni]			OG0000032	0	0	0	0	2	1	2	3	2	4	0	4	4	4	0	0	1	0		1.5	1.65387		OG0000032	-0.906962	-0.906962	-0.906962	-0.906962	0.302321	-0.302321
OG0000033					CDR78683.1 Phage related DNA methylase_ParB/RepB/Spo0J family partition protein_ParB-like nuclease domain [Wolbachia], CDR78684.1 Phage related DNA methylase_Modification methylase DpnIIB_putative methyltransferase_Adenine specific DNA methylase Mod_DNA methylase [Wolbachia], CDR79043.1 prophage LambdaW1_ DNA methylase_Modification methylase DpnIIB_putative methyltransferase_Adenine specific DNA …	AAS14003.1 prophage LambdaW1_ DNA methylase [Wolbachia endosymbiont of Drosophila melanogaster], AAS14297.1 prophage LambdaW4_ DNA methylase [Wolbachia endosymbiont of Drosophila melanogaster]	AGJ99702.1 DNA methylase [Wolbachia endosymbiont of Drosophila simulans wHa], AGJ99715.1 DNA methylase [Wolbachia endosymbiont of Drosophila simulans wHa], AGJ99828.1 DNA methylase [Wolbachia endosymbiont of Drosophila simulans wHa]	ACN95341.1 DNA methylase [Wolbachia sp. wRi], ACN95735.1 DNA methylase [Wolbachia sp. wRi]	AGJ99293.1 DNA methylase [Wolbachia endosymbiont of Drosophila simulans wNo]	CAQ54366.1 Phage related DNA methylase [Wolbachia endosymbiont of Culex quinquefasciatus Pel], CAQ54425.1 Phage related DNA methylase [Wolbachia endosymbiont of Culex quinquefasciatus Pel], CAQ54537.1 Phage related DNA methylase [Wolbachia endosymbiont of Culex quinquefasciatus Pel], CAQ55418.1 Phage related DNA methylase [Wolbachia endosymbiont of Culex quinquefasciatus Pel]		WP_019236284.1 DNA methylase N-4_ partial [Wolbachia pipientis], WP_019236428.1 DNA methylase N-4 [Wolbachia pipientis], WP_019236501.1 DNA methylase N-4 [Wolbachia pipientis], WP_026097199.1 DNA methylase N-4 [Wolbachia pipientis]	WP_047759132.1 DNA methylase N-4 [Wolbachia endosymbiont of Armadillidium vulgare], WP_047759174.1 DNA methylase N-4 [Wolbachia endosymbiont of Armadillidium vulgare], WP_047759257.1 DNA methylase N-4 [Wolbachia endosymbiont of Armadillidium vulgare], WP_047759512.1 DNA methylase N-4 [Wolbachia endosymbiont of Armadillidium vulgare]	wFol_05730 wFol_05730 Phage related DNA methylase 683175_684410 forward MW_47180, wFol_06030 wFol_06030 Phage related DNA methylase 712939_714174 forward MW_47210, wFol_09500 wFol_09500 DNA methylase 1130674_1131912 reverse MW_47451			ONI56239.1 DNA methylase family protein [Wolbachia pipientis wUni]			OG0000033	0	0	0	0	3	2	3	2	1	4	0	4	4	3	0	0	1	0		1.5	1.61791		OG0000033	-0.927119	-0.927119	-0.927119	-0.927119	0.927119	0.30904
OG0000034					CDR78695.1 Putative phage related protein [Wolbachia], CDR79030.1 Putative phage related protein [Wolbachia]	AAS14011.1 conserved hypothetical protein [Wolbachia endosymbiont of Drosophila melanogaster], AAS14306.1 conserved hypothetical protein [Wolbachia endosymbiont of Drosophila melanogaster]	AGJ99725.1 hypothetical protein wHa_02490 [Wolbachia endosymbiont of Drosophila simulans wHa], AGJ99820.1 hypothetical protein wHa_03510 [Wolbachia endosymbiont of Drosophila simulans wHa]	ACN95331.1 hypothetical protein WRi_005540 [Wolbachia sp. wRi], ACN95469.1 hypothetical protein WRi_007150 [Wolbachia sp. wRi], ACN95725.1 hypothetical protein WRi_010200 [Wolbachia sp. wRi], ACN95938.1 hypothetical protein WRi_012600 [Wolbachia sp. wRi]	AGJ98564.1 hypothetical protein wNo_01190 [Wolbachia endosymbiont of Drosophila simulans wNo]	CAQ54358.1 Putative phage related protein [Wolbachia endosymbiont of Culex quinquefasciatus Pel], CAQ54417.1 PUtative phage related protein [Wolbachia endosymbiont of Culex quinquefasciatus Pel], CAQ54436.1 Putative phage related protein [Wolbachia endosymbiont of Culex quinquefasciatus Pel], CAQ54532.1 putative phage related protein [Wolbachia endosymbiont of Culex quinquefasciatus Pel], CAQ5540…		WP_019236292.1 minor capsid protein E [Wolbachia pipientis], WP_019236398.1 minor capsid protein E [Wolbachia pipientis], WP_026097201.1 minor capsid protein E [Wolbachia pipientis], WP_026097211.1 minor capsid protein E [Wolbachia pipientis]	WP_047759179.1 elements of external origin [Wolbachia endosymbiont of Armadillidium vulgare], WP_047759250.1 elements of external origin [Wolbachia endosymbiont of Armadillidium vulgare], WP_047759516.1 elements of external origin [Wolbachia endosymbiont of Armadillidium vulgare], WP_047759658.1 elements of external origin [Wolbachia endosymbiont of Armadillidium vulgare]	wFol_05830 wFol_05830 Putative phage major capsid protein E 692331_693332 forward MW_37136, wFol_06110 wFol_06110 Putative phage major capsid protein E 721560_722561 forward MW_37141, wFol_09410 wFol_09410 Putative phage major capsid protein E 1121526_1122530 reverse MW_37209						OG0000034	0	0	0	0	2	2	2	4	1	5	0	4	4	3	0	0	0	0		1.5	1.7905		OG0000034	-0.837756	-0.837756	-0.837756	-0.837756	0.279252	0.279252
OG0000035					CDR78699.1 prophage LambdaW5_ baseplate assembly protein V_Phage P2 baseplate assembly protein gpV_phage baseplate assembly protein V_Phage-related baseplate assembly protein [Wolbachia], CDR79024.1 baseplate assembly protein V_Phage P2 baseplate assembly protein gpV_phage baseplate assembly protein V_Phage-related baseplate assembly protein [Wolbachia]	AAS14341.1 prophage LambdaW5_ baseplate assembly protein V [Wolbachia endosymbiont of Drosophila melanogaster]	AGJ99728.1 Baseplate assembly protein V [Wolbachia endosymbiont of Drosophila simulans wHa], AGJ99817.1 Baseplate assembly protein V [Wolbachia endosymbiont of Drosophila simulans wHa]	ACN95327.1 baseplate assembly protein V [Wolbachia sp. wRi], ACN95465.1 baseplate assembly protein V [Wolbachia sp. wRi], ACN95721.1 baseplate assembly protein V [Wolbachia sp. wRi], ACN95934.1 baseplate assembly protein V [Wolbachia sp. wRi]	AGJ98560.1 Baseplate assembly protein GpV [Wolbachia endosymbiont of Drosophila simulans wNo], AGJ99128.1 Baseplate assembly protein GpV [Wolbachia endosymbiont of Drosophila simulans wNo]	CAQ54354.1 baseplate assembly protein GpV [Wolbachia endosymbiont of Culex quinquefasciatus Pel], CAQ54413.1 baseplate assembly protein GpV [Wolbachia endosymbiont of Culex quinquefasciatus Pel], CAQ54440.1 Putative baseplate assembly protein GpV [Wolbachia endosymbiont of Culex quinquefasciatus Pel], CAQ54527.1 baseplate assembly protein GpV [Wolbachia endosymbiont of Culex quinquefasciatus Pel]…	WP_015588920.1 MULTISPECIES_ baseplate assembly protein V [Wolbachia]	WP_019236395.1 baseplate assembly protein [Wolbachia pipientis], WP_019236416.1 baseplate assembly protein [Wolbachia pipientis]	WP_047759247.1 baseplate assembly protein V [Wolbachia endosymbiont of Armadillidium vulgare], WP_047759303.1 baseplate assembly protein V [Wolbachia endosymbiont of Armadillidium vulgare], WP_047759346.1 baseplate assembly protein V [Wolbachia endosymbiont of Armadillidium vulgare], WP_047759504.1 baseplate assembly protein V [Wolbachia endosymbiont of Armadillidium vulgare], WP_047759656.1 base…	wFol_05870 wFol_05870 Phage baseplate assembly protein V 694692_695156 forward MW_17572, wFol_09370 wFol_09370 Baseplate assembly protein V 1119688_1120152 reverse MW_17478, wFol_10490 wFol_10490 Baseplate assembly protein V 1247251_1247715 forward MW_17681						OG0000035	0	0	0	0	2	1	2	4	2	5	1	2	5	3	0	0	0	0		1.5	1.75734		OG0000035	-0.853564	-0.853564	-0.853564	-0.853564	0.284521	-0.284521
OG0000036	wOo_03520 wOo_03520 amino acid transporter 297681_298985 reverse MW_47438, wOo_03530 wOo_03530 amino acid transporter 298995_300419 reverse MW_52496	WP_025264363.1 amino acid permease [Wolbachia endosymbiont of Onchocerca volvulus]	gi|58584305|ref|YP_197878.1| Amino acid transporter [Wolbachia endosymbiont strain TRS of Brugia malayi], gi|58584306|ref|YP_197879.1| Amino acid transporter [Wolbachia endosymbiont strain TRS of Brugia malayi]	BAP00293.1 amino acid permease family protein [Wolbachia endosymbiont of Cimex lectularius], BAP00294.1 basic amino acid/polyamine antiporter APA family [Wolbachia endosymbiont of Cimex lectularius]	CDR79322.1 Amino acid permease family protein_Arginine/agmatine antiporter_arginine_agmatin antiporter_Amino acid transporters_transporter_ basic amino acid/polyamine antiporter _APA_ family_Amino acid permease [Wolbachia]	AAS14621.1 amino acid permease family protein [Wolbachia endosymbiont of Drosophila melanogaster]	AGK00225.1 Amino acid permease family protein [Wolbachia endosymbiont of Drosophila simulans wHa]	ACN95625.1 Amino acid permease family protein [Wolbachia sp. wRi]	AGJ98813.1 Amino acid permease family protein [Wolbachia endosymbiont of Drosophila simulans wNo], AGJ98814.1 Amino acid permease family protein [Wolbachia endosymbiont of Drosophila simulans wNo]	CAQ54830.1 amino acid permease family protein [Wolbachia endosymbiont of Culex quinquefasciatus Pel], CAQ54831.1 amino acid permease family protein [Wolbachia endosymbiont of Culex quinquefasciatus Pel]	WP_038199245.1 amino acid permease [Wolbachia pipientis]	WP_019236733.1 amino acid permease [Wolbachia pipientis], WP_019236734.1 amino acid permease [Wolbachia pipientis]	WP_047758855.1 amino acid permease [Wolbachia endosymbiont of Armadillidium vulgare], WP_047758856.1 amino acid permease [Wolbachia endosymbiont of Armadillidium vulgare]	wFol_03460 wFol_03460 Amino acid permease 404838_406133 forward MW_46729	OCA06828.1 amino acid permease family protein [Wolbachia endosymbiont of Trichogramma pretiosum], OCA06829.1 amino acid permease family protein [Wolbachia endosymbiont of Trichogramma pretiosum]	wLcla09720 wLcla09720 Amino acid permease family protein 884914_886200 reverse MW_46595, wLcla09730 wLcla09730 Amino acid permease family protein 886271_887545 reverse MW_46130	ONI56083.1 amino acid permease family protein [Wolbachia pipientis wUni]	OEY86451.1 amino acid permease [Wolbachia pipientis]		OG0000036	2	1	2	2	1	1	1	1	2	2	1	2	2	1	2	2	1	1		1.5	0.514496		OG0000036	0.971825	-0.971825	0.971825	0.971825	-0.971825	-0.971825
OG0000037			gi|58584370|ref|YP_197943.1| hypothetical protein Wbm0109 [Wolbachia endosymbiont strain TRS of Brugia malayi]	BAO99844.1 putative uncharacterized protein [Wolbachia endosymbiont of Cimex lectularius]	CDR78622.1 hypothetical protein WPAU_0230 [Wolbachia], CDR79268.1 hypothetical protein WPAU_0897 [Wolbachia]	AAS13954.1 hypothetical protein WD_0209 [Wolbachia endosymbiont of Drosophila melanogaster], AAS14771.1 conserved hypothetical protein [Wolbachia endosymbiont of Drosophila melanogaster]	AGJ99678.1 hypothetical protein wHa_01970 [Wolbachia endosymbiont of Drosophila simulans wHa], AGK00351.1 hypothetical protein wHa_09360 [Wolbachia endosymbiont of Drosophila simulans wHa]	ACN95033.1 hypothetical protein WRi_002010 [Wolbachia sp. wRi], ACN95969.1 hypothetical protein WRi_012910 [Wolbachia sp. wRi]	AGJ99347.1 hypothetical protein wNo_09710 [Wolbachia endosymbiont of Drosophila simulans wNo]	CAQ54294.1 Hypothetical protein WP0186 [Wolbachia endosymbiont of Culex quinquefasciatus Pel], CAQ54966.1 hypothetical protein WP0858 [Wolbachia endosymbiont of Culex quinquefasciatus Pel]	WP_038199731.1 hypothetical protein [Wolbachia pipientis], WP_051955863.1 hypothetical protein [Wolbachia pipientis]	WP_007302674.1 MULTISPECIES_ hypothetical protein [Wolbachia], WP_019236870.1 hypothetical protein [Wolbachia pipientis]	WP_047758676.1 hypothetical protein [Wolbachia endosymbiont of Armadillidium vulgare]	wFol_11280 wFol_11280 AAA family protein 1347598_1348200 forward MW_22945, wFol_12910 wFol_12910 Putative P-loop containing nucleoside triphosphate hydrolase 1531992_1532615 reverse MW_23818	OCA06037.1 AAA domain protein [Wolbachia endosymbiont of Trichogramma pretiosum], OCA06481.1 hypothetical protein wTpre_815 [Wolbachia endosymbiont of Trichogramma pretiosum]	wLcla06220 wLcla06220 Uncharacterized protein 577159_577758 forward MW_22831, wLcla11820 wLcla11820 Uncharacterized protein 1082760_1083242 forward MW_18632	ONI55779.1 hypothetical protein N500_1156 [Wolbachia pipientis wUni], ONI56689.1 hypothetical protein N500_0223 [Wolbachia pipientis wUni]			OG0000037	0	0	1	1	2	2	2	2	1	2	2	2	1	2	2	2	2	0		1.44444	0.783823		OG0000037	-1.84282	-1.84282	-0.567021	-0.567021	0.708776	0.708776
OG0000038					CDR78688.1 Putative phage related protein_gpW [Wolbachia], CDR79039.1 Putative phage related protein_gpW [Wolbachia]	AAS14006.1 hypothetical protein WD_0266 [Wolbachia endosymbiont of Drosophila melanogaster], AAS14301.1 hypothetical protein WD_0598 [Wolbachia endosymbiont of Drosophila melanogaster]	AGJ99718.1 Putative phage head stabilizing protein GpW [Wolbachia endosymbiont of Drosophila simulans wHa]	ACN95337.1 hypothetical protein WRi_005600 [Wolbachia sp. wRi], ACN95474.1 hypothetical protein WRi_007200 [Wolbachia sp. wRi], ACN95731.1 hypothetical protein WRi_010260 [Wolbachia sp. wRi], ACN95944.1 hypothetical protein WRi_012660 [Wolbachia sp. wRi]	AGJ98567.1 Putative phage head stabilizing protein GpW [Wolbachia endosymbiont of Drosophila simulans wNo], AGJ99297.1 Putative phage head stabilizing protein GpW [Wolbachia endosymbiont of Drosophila simulans wNo]	CAQ54362.1 Putative phage related protein [Wolbachia endosymbiont of Culex quinquefasciatus Pel], CAQ54421.1 Putative phage related protein [Wolbachia endosymbiont of Culex quinquefasciatus Pel], CAQ54432.1 Putative phage related protein [Wolbachia endosymbiont of Culex quinquefasciatus Pel], CAQ55414.1 putative phage related protein [Wolbachia endosymbiont of Culex quinquefasciatus Pel], CAQ5546…		WP_007301848.1 MULTISPECIES_ hypothetical protein [Wolbachia], WP_007302777.1 MULTISPECIES_ hypothetical protein [Wolbachia], WP_019236402.1 hypothetical protein [Wolbachia pipientis]	WP_047759176.1 phage head stabilizing protein GpW [Wolbachia endosymbiont of Armadillidium vulgare], WP_047759254.1 phage head stabilizing protein GpW [Wolbachia endosymbiont of Armadillidium vulgare], WP_047759508.1 phage head stabilizing protein GpW [Wolbachia endosymbiont of Armadillidium vulgare], WP_047759662.1 phage head stabilizing protein GpW [Wolbachia endosymbiont of Armadillidium vulga…	wFol_05770 wFol_05770 GpW-like phage protein 688391_688624 forward MW_8898, wFol_06070 wFol_06070 GpW-like phage protein 718134_718358 forward MW_8486, wFol_09460 wFol_09460 Putative phage head-to-tail joining protein GpW 1126488_1126712 reverse MW_8588						OG0000038	0	0	0	0	2	2	1	4	2	5	0	3	4	3	0	0	0	0		1.44444	1.72259		OG0000038	-0.83853	-0.83853	-0.83853	-0.83853	0.322512	0.322512
OG0000039					CDR78694.1 putative phage related protein [Wolbachia], CDR79031.1 putative phage related protein [Wolbachia]	AAS14010.1 conserved hypothetical protein [Wolbachia endosymbiont of Drosophila melanogaster], AAS14305.1 conserved hypothetical protein [Wolbachia endosymbiont of Drosophila melanogaster]	AGJ99724.1 hypothetical protein wHa_02480 [Wolbachia endosymbiont of Drosophila simulans wHa], AGJ99821.1 hypothetical protein wHa_03520 [Wolbachia endosymbiont of Drosophila simulans wHa]	ACN95332.1 hypothetical protein WRi_005550 [Wolbachia sp. wRi], ACN95470.1 hypothetical protein WRi_007160 [Wolbachia sp. wRi], ACN95726.1 hypothetical protein WRi_010210 [Wolbachia sp. wRi], ACN95939.1 hypothetical protein WRi_012610 [Wolbachia sp. wRi]	AGJ98565.1 hypothetical protein wNo_01200 [Wolbachia endosymbiont of Drosophila simulans wNo], AGJ99382.1 hypothetical protein wNo_10080 [Wolbachia endosymbiont of Drosophila simulans wNo]	CAQ54359.1 Putative phage related protein [Wolbachia endosymbiont of Culex quinquefasciatus Pel], CAQ54418.1 Putative phage related protein [Wolbachia endosymbiont of Culex quinquefasciatus Pel], CAQ54435.1 Putative phage related protein [Wolbachia endosymbiont of Culex quinquefasciatus Pel], CAQ54533.1 putative phage related protein [Wolbachia endosymbiont of Culex quinquefasciatus Pel], CAQ5541…		WP_019236291.1 hypothetical protein [Wolbachia pipientis], WP_019236399.1 hypothetical protein [Wolbachia pipientis]	WP_047759178.1 bacteriophage-related protein [Wolbachia endosymbiont of Armadillidium vulgare], WP_047759251.1 bacteriophage-related protein [Wolbachia endosymbiont of Armadillidium vulgare], WP_047759506.1 bacteriophage-related protein [Wolbachia endosymbiont of Armadillidium vulgare], WP_047759659.1 bacteriophage-related protein [Wolbachia endosymbiont of Armadillidium vulgare]	wFol_05820 wFol_05820 Putative phage head decoration protein D 691955_692326 forward MW_13127, wFol_06100 wFol_06100 Putative phage head decoration protein D 721146_721514 forward MW_13213, wFol_09420 wFol_09420 Putative phage head decoration protein 1122532_1122903 reverse MW_13189						OG0000039	0	0	0	0	2	2	2	4	2	5	0	2	4	3	0	0	0	0		1.44444	1.6881		OG0000039	-0.855664	-0.855664	-0.855664	-0.855664	0.329102	0.329102
OG0000040				BAP00058.1 ankyrin repeat-containing protein [Wolbachia endosymbiont of Cimex lectularius]	CDR78710.1 ankyrin repeat-containing prophage LambdaW1_Ankyrin repeats _3 copies_ [Wolbachia], CDR79011.1 ankyrin repeat-containing prophage LambdaW1_Ankyrin repeats _3 copies_ [Wolbachia]	AAS14028.1 prophage LambdaW1_ ankyrin repeat domain protein [Wolbachia endosymbiont of Drosophila melanogaster], AAS14332.1 prophage LambdaW5_ ankyrin repeat domain protein [Wolbachia endosymbiont of Drosophila melanogaster]	AGJ99704.1 Ankyrin repeat domain protein [Wolbachia endosymbiont of Drosophila simulans wHa], AGJ99739.1 Ankyrin repeat domain protein [Wolbachia endosymbiont of Drosophila simulans wHa], AGJ99991.1 Ankyrin repeat domain protein [Wolbachia endosymbiont of Drosophila simulans wHa]	ACN95318.1 ankyrin repeat domain protein [Wolbachia sp. wRi], ACN95430.1 ankyrin repeat domain protein [Wolbachia sp. wRi], ACN95712.1 ankyrin repeat domain protein [Wolbachia sp. wRi]	AGJ99426.1 hypothetical protein wNo_10550 [Wolbachia endosymbiont of Drosophila simulans wNo]	CAQ54404.1 Ankyrin repeat domain protein [Wolbachia endosymbiont of Culex quinquefasciatus Pel], CAQ54498.1 ankyrin repeat domain protein [Wolbachia endosymbiont of Culex quinquefasciatus Pel], CAQ55401.1 ankyrin repeat domain protein [Wolbachia endosymbiont of Culex quinquefasciatus Pel]	WP_051955813.1 ankryin [Wolbachia pipientis]	WP_019236481.1 hypothetical protein [Wolbachia pipientis], WP_019236534.1 hypothetical protein_ partial [Wolbachia pipientis], WP_019236590.1 hypothetical protein [Wolbachia pipientis]	WP_047759185.1 ankyrin [Wolbachia endosymbiont of Armadillidium vulgare], WP_047759238.1 ankyrin [Wolbachia endosymbiont of Armadillidium vulgare]		OCA05835.1 hypothetical protein wTpre_153 [Wolbachia endosymbiont of Trichogramma pretiosum], OCA05836.1 gp32 domain protein [Wolbachia endosymbiont of Trichogramma pretiosum], OCA05837.1 gp32 domain protein [Wolbachia endosymbiont of Trichogramma pretiosum], OCA05839.1 hypothetical protein wTpre_157 [Wolbachia endosymbiont of Trichogramma pretiosum], OCA07067.1 ankyrin repeat family protein [Wol…					OG0000040	0	0	0	1	2	2	3	3	1	3	1	3	2	0	5	0	0	0		1.44444	1.50381		OG0000040	-0.960525	-0.960525	-0.960525	-0.295546	0.369433	0.369433
OG0000041					CDR78828.1 reverse transcriptase_Group II intron-encoded protein ltrA_Retron-type reverse transcriptase_Reverse transcriptase _RNA-dependent DNA polymerase_ [Wolbachia], CDR78940.1 reverse transcriptase_Group II intron-encoded protein ltrA_Retron-type reverse transcriptase_Reverse transcriptase _RNA-dependent DNA polymerase_ [Wolbachia], CDR78996.1 reverse transcriptase_Group II intron-encoded pr…	AAS14390.1 reverse transcriptase_ putative [Wolbachia endosymbiont of Drosophila melanogaster], AAS14656.1 reverse transcriptase [Wolbachia endosymbiont of Drosophila melanogaster], AAS14789.1 reverse transcriptase_ putative [Wolbachia endosymbiont of Drosophila melanogaster]		ACN94983.1 reverse transcriptase_ putative [Wolbachia sp. wRi], ACN95161.1 reverse transcriptase_ putative [Wolbachia sp. wRi], ACN95174.1 reverse transcriptase_ putative [Wolbachia sp. wRi], ACN95313.1 reverse transcriptase_ putative [Wolbachia sp. wRi], ACN95659.1 reverse transcriptase_ putative [Wolbachia sp. wRi], ACN95707.1 reverse transcriptase_ putative [Wolbachia sp. wRi], ACN95762.1 reve…	AGJ98863.1 Reverse transcriptase_ putative [Wolbachia endosymbiont of Drosophila simulans wNo], AGJ98972.1 Reverse transcriptase_ putative [Wolbachia endosymbiont of Drosophila simulans wNo], AGJ99079.1 Reverse transcriptase_ putative [Wolbachia endosymbiont of Drosophila simulans wNo], AGJ99123.1 Reverse transcriptase_ putative [Wolbachia endosymbiont of Drosophila simulans wNo], AGJ99290.1 Reve…		WP_038199269.1 group II intron reverse transcriptase/maturase [Wolbachia pipientis]	WP_019236826.1 group II intron reverse transcriptase/maturase [Wolbachia pipientis]	WP_047759082.1 hypothetical protein_ partial [Wolbachia endosymbiont of Armadillidium vulgare]							OG0000041	0	0	0	0	7	3	0	7	6	0	1	1	1	0	0	0	0	0		1.44444	2.52569		OG0000041	-0.571902	-0.571902	-0.571902	-0.571902	2.19962	0.615895
OG0000042					CDR78685.1 Putative phage related protein [Wolbachia], CDR79042.1 Putative phage related protein [Wolbachia]	AAS14004.1 conserved hypothetical protein [Wolbachia endosymbiont of Drosophila melanogaster], AAS14298.1 conserved hypothetical protein [Wolbachia endosymbiont of Drosophila melanogaster]	AGJ99716.1 hypothetical protein wHa_02390 [Wolbachia endosymbiont of Drosophila simulans wHa], AGJ99826.1 hypothetical protein wHa_03580 [Wolbachia endosymbiont of Drosophila simulans wHa]	ACN95340.1 hypothetical protein WRi_005630 [Wolbachia sp. wRi], ACN95513.1 hypothetical protein WRi_007640 [Wolbachia sp. wRi], ACN95734.1 hypothetical protein WRi_010290 [Wolbachia sp. wRi]	AGJ98570.1 hypothetical protein wNo_01260 [Wolbachia endosymbiont of Drosophila simulans wNo], AGJ99294.1 hypothetical protein wNo_09060 [Wolbachia endosymbiont of Drosophila simulans wNo]	CAQ54365.1 Putative phage related protein [Wolbachia endosymbiont of Culex quinquefasciatus Pel], CAQ54424.1 Putative phage related protein [Wolbachia endosymbiont of Culex quinquefasciatus Pel], CAQ55417.1 Putative phage related protein [Wolbachia endosymbiont of Culex quinquefasciatus Pel]		WP_015589000.1 MULTISPECIES_ hypothetical protein [Wolbachia], WP_019236285.1 hypothetical protein [Wolbachia pipientis], WP_019236426.1 hypothetical protein [Wolbachia pipientis]	WP_047759133.1 phage related protein [Wolbachia endosymbiont of Armadillidium vulgare], WP_047759256.1 phage related protein [Wolbachia endosymbiont of Armadillidium vulgare], WP_047759511.1 phage related protein [Wolbachia endosymbiont of Armadillidium vulgare], WP_047759843.1 phage related protein [Wolbachia endosymbiont of Armadillidium vulgare]	wFol_05740 wFol_05740 Putative phage related protein 684433_684939 forward MW_19088, wFol_06040 wFol_06040 Putative phage related protein 714242_714715 forward MW_17906, wFol_09490 wFol_09490 Uncharacterized protein 1130146_1130637 reverse MW_18458			ONI56241.1 hypothetical protein N500_0697_ partial [Wolbachia pipientis wUni]			OG0000042	0	0	0	0	2	2	2	3	2	3	0	3	4	3	0	0	1	0		1.38889	1.41998		OG0000042	-0.978105	-0.978105	-0.978105	-0.978105	0.430366	0.430366
OG0000043					CDR78709.1 site-specific recombinase_ resolvase family_DNA-invertase hin_Resolvase_ N terminal domain [Wolbachia], CDR79015.1 prophage LambdaW1_ site-specific recombinase resolvase family protein_DNA-invertase hin_Resolvase_ N terminal domain [Wolbachia]	AAS14024.1 prophage LambdaW1_ site-specific recombinase_ resolvase family [Wolbachia endosymbiont of Drosophila melanogaster], AAS14333.1 prophage LambdaW5_ site-specific recombinase_ resolvase family [Wolbachia endosymbiont of Drosophila melanogaster]	AGJ99736.1 Site-specific recombinase_ resolvase family [Wolbachia endosymbiont of Drosophila simulans wHa]	ACN95319.1 site-specific recombinase_ resolvase family [Wolbachia sp. wRi], ACN95713.1 site-specific recombinase_ resolvase family [Wolbachia sp. wRi]	AGJ98553.1 Site-specific recombinase_ resolvase family [Wolbachia endosymbiont of Drosophila simulans wNo]	CAQ54405.1 site-specific recombinase_ resolvase family [Wolbachia endosymbiont of Culex quinquefasciatus Pel], CAQ54450.1 site-specific recombinase_ resolvase family [Wolbachia endosymbiont of Culex quinquefasciatus Pel], CAQ54504.1 putative site-specific recombinase_ resolvase family [Wolbachia endosymbiont of Culex quinquefasciatus Pel], CAQ54519.1 site-specific recombinase_ resolvase family [W…	WP_038198586.1 recombinase [Wolbachia pipientis]	WP_019236483.1 recombinase_ partial [Wolbachia pipientis], WP_019236492.1 recombinase [Wolbachia pipientis], WP_026097212.1 recombinase [Wolbachia pipientis]	WP_047759327.1 recombinase [Wolbachia endosymbiont of Armadillidium vulgare], WP_047759351.1 recombinase [Wolbachia endosymbiont of Armadillidium vulgare]	wFol_03590 wFol_03590 Site-specific recombinase_ resolvase family 418085_419737 reverse MW_63145, wFol_06230 wFol_06230 Resolvase 728834_730486 forward MW_63263, wFol_09270 wFol_09270 Resolvase 1111176_1112849 reverse MW_63680, wFol_10570 wFol_10570 Resolvase 1252124_1253776 forward MW_63263	OCA07068.1 site-specific recombinase_ resolvase family [Wolbachia endosymbiont of Trichogramma pretiosum], OCA07069.1 hypothetical protein wTpre_1425 [Wolbachia endosymbiont of Trichogramma pretiosum], OCA07070.1 recombinase family protein [Wolbachia endosymbiont of Trichogramma pretiosum]					OG0000043	0	0	0	0	2	2	1	2	1	4	1	3	2	4	3	0	0	0		1.38889	1.41998		OG0000043	-0.978105	-0.978105	-0.978105	-0.978105	0.430366	0.430366
OG0000044				BAO99640.1 putative uncharacterized protein [Wolbachia endosymbiont of Cimex lectularius], BAP00481.1 putative uncharacterized protein [Wolbachia endosymbiont of Cimex lectularius]	CDR78867.1 ankyrin repeat domain protein_Predicted cysteine protease _OTU family__OTU-like cysteine protease [Wolbachia]	AAS14166.1 hypothetical protein WD_0443 [Wolbachia endosymbiont of Drosophila melanogaster]	AGJ99523.1 hypothetical protein wHa_00230 [Wolbachia endosymbiont of Drosophila simulans wHa], AGJ99803.1 hypothetical protein wHa_03320 [Wolbachia endosymbiont of Drosophila simulans wHa]	ACN94895.1 hypothetical protein WRi_000250 [Wolbachia sp. wRi], ACN95120.1 hypothetical protein WRi_003020 [Wolbachia sp. wRi]	AGJ98514.1 hypothetical protein wNo_00530 [Wolbachia endosymbiont of Drosophila simulans wNo]	CAQ54177.1 hypothetical protein WP0068 [Wolbachia endosymbiont of Culex quinquefasciatus Pel], CAQ54660.1 hypothetical protein WP0552 [Wolbachia endosymbiont of Culex quinquefasciatus Pel]	WP_038198764.1 hypothetical protein [Wolbachia pipientis]	WP_019236331.1 hypothetical protein [Wolbachia pipientis], WP_019236643.1 hypothetical protein [Wolbachia pipientis]	WP_047758713.1 hypothetical protein [Wolbachia endosymbiont of Armadillidium vulgare]	wFol_08000 wFol_08000 Putative OTU-like cysteine proteases 962812_963861 forward MW_39791, wFol_08010 wFol_08010 Uncharacterized protein 964020_964526 forward MW_19247	OCA06001.1 hypothetical protein wTpre_322 [Wolbachia endosymbiont of Trichogramma pretiosum], OCA06004.1 ankyrin repeat domain protein [Wolbachia endosymbiont of Trichogramma pretiosum]	wLcla00410 wLcla00410 Uncharacterized protein 32502_32750 reverse MW_9539, wLcla02760 wLcla02760 Uncharacterized protein 243051_244232 forward MW_45333	ONI56497.1 prophage LambdaW5_ ankyrin repeat domain protein [Wolbachia pipientis wUni], ONI56885.1 hypothetical protein N500_0035_ partial [Wolbachia pipientis wUni]	OEY86419.1 hypothetical protein BIY23_04310 [Wolbachia pipientis], OEY87044.1 hypothetical protein BIY23_00965 [Wolbachia pipientis]		OG0000044	0	0	0	2	1	1	2	2	1	2	1	2	1	2	2	2	2	2		1.38889	0.777544		OG0000044	-1.78625	-1.78625	-1.78625	0.78595	-0.50015	-0.50015
OG0000045					CDR78455.1 Transposase [Wolbachia], CDR78516.1 Transposase [Wolbachia], CDR78547.1 Transposase [Wolbachia], CDR78564.1 Transposase [Wolbachia], CDR78636.1 Transposase [Wolbachia], CDR78718.1 Transposase [Wolbachia], CDR78772.1 Transposase [Wolbachia], CDR78796.1 Transposase [Wolbachia], CDR78924.1 Transposase [Wolbachia], CDR78955.1 Transposase [Wolbachia], CDR79236.1 Transposase [Wolbachia], CDR…				AGJ99491.1 Putative transposase [Wolbachia endosymbiont of Drosophila simulans wNo]		WP_007548384.1 MULTISPECIES_ transposase [Wolbachia], WP_038198869.1 MULTISPECIES_ transposase [Wolbachia], WP_038198902.1 transposase [Wolbachia pipientis], WP_038199084.1 transposase [Wolbachia pipientis], WP_038199181.1 transposase [Wolbachia pipientis], WP_038199510.1 transposase [Wolbachia pipientis]	WP_019236592.1 transposase [Wolbachia pipientis]		wFol_09190 wFol_09190 Transposase_ IS3 family 1089136_1089357 reverse MW_8381			ONI56410.1 transposase IS3/IS911_ partial [Wolbachia pipientis wUni], ONI56483.1 transposase [Wolbachia pipientis wUni], ONI56824.1 transposase [Wolbachia pipientis wUni]			OG0000045	0	0	0	0	12	0	0	0	1	0	6	1	0	1	0	0	3	0		1.33333	3.06786		OG0000045	-0.434613	-0.434613	-0.434613	-0.434613	3.47691	-0.434613
OG0000046					CDR78693.1 prophage LambdaW4_ minor capsid protein C_Probable protease sohB_putative inner membrane peptidase_signal peptide peptidase SppA_ 36K type_Peptidase family S49 [Wolbachia], CDR79033.1 minor capsid protein C_ putative_Probable protease sohB_putative inner membrane peptidase_signal peptide peptidase SppA_ 36K type_Peptidase family S49 [Wolbachia]	AAS14304.1 prophage LambdaW4_ minor capsid protein C_ putative [Wolbachia endosymbiont of Drosophila melanogaster]	AGJ99722.1 Minor capsid protein C_ putative [Wolbachia endosymbiont of Drosophila simulans wHa], AGJ99822.1 Putative minor capsid protein C [Wolbachia endosymbiont of Drosophila simulans wHa]	ACN95333.1 minor capsid protein C_ putative [Wolbachia sp. wRi], ACN95471.1 minor capsid protein C_ putative [Wolbachia sp. wRi], ACN95727.1 minor capsid protein C_ putative [Wolbachia sp. wRi], ACN95941.1 minor capsid protein C_ putative [Wolbachia sp. wRi]	AGJ98566.1 Minor capsid protein C_ putative [Wolbachia endosymbiont of Drosophila simulans wNo]	CAQ54360.1 Putative minor capsid protein c [Wolbachia endosymbiont of Culex quinquefasciatus Pel], CAQ54419.1 Putative minor capsid protein c [Wolbachia endosymbiont of Culex quinquefasciatus Pel], CAQ54434.1 Putative minor capsid protein c [Wolbachia endosymbiont of Culex quinquefasciatus Pel], CAQ54534.1 putative minor capsid protein c [Wolbachia endosymbiont of Culex quinquefasciatus Pel], CAQ…		WP_019236290.1 phage capsid protein [Wolbachia pipientis], WP_019236400.1 phage capsid protein [Wolbachia pipientis], WP_019236994.1 phage capsid protein_ partial [Wolbachia pipientis]	WP_047759177.1 capsid protein [Wolbachia endosymbiont of Armadillidium vulgare], WP_047759329.1 capsid protein_ partial [Wolbachia endosymbiont of Armadillidium vulgare], WP_047759660.1 capsid protein [Wolbachia endosymbiont of Armadillidium vulgare]	wFol_05810 wFol_05810 Putative phage minor capsid protein C 690761_691849 forward MW_40367, wFol_06090 wFol_06090 Putative phage minor capsid protein C 719955_721037 forward MW_40131, wFol_09430 wFol_09430 Putative minor capsid protein C 1122922_1124013 reverse MW_40434						OG0000046	0	0	0	0	2	1	2	4	1	5	0	3	3	3	0	0	0	0		1.33333	1.64496		OG0000046	-0.810558	-0.810558	-0.810558	-0.810558	0.405279	-0.20264
OG0000047					CDR78697.1 minor tail protein Z_ putative_Prophage minor tail protein Z _GPZ_ [Wolbachia], CDR79026.1 prophage LambdaW1_ minor tail protein Z_Prophage minor tail protein Z _GPZ_ [Wolbachia]	AAS14015.1 prophage LambdaW1_ minor tail protein Z_ putative [Wolbachia endosymbiont of Drosophila melanogaster], AAS14343.1 prophage LambdaW5_ minor tail protein Z_ putative [Wolbachia endosymbiont of Drosophila melanogaster]	AGJ99726.1 Minor tail protein Z_ putative [Wolbachia endosymbiont of Drosophila simulans wHa], AGJ99819.1 Minor tail protein Z_ putative [Wolbachia endosymbiont of Drosophila simulans wHa]	ACN95329.1 minor tail protein Z_ putative [Wolbachia sp. wRi], ACN95467.1 minor tail protein Z_ putative [Wolbachia sp. wRi], ACN95723.1 minor tail protein Z_ putative [Wolbachia sp. wRi]	AGJ98562.1 Putative minor tail protein z [Wolbachia endosymbiont of Drosophila simulans wNo], AGJ99126.1 Putative minor tail protein z [Wolbachia endosymbiont of Drosophila simulans wNo]	CAQ54356.1 Puative minor tail protein z [Wolbachia endosymbiont of Culex quinquefasciatus Pel], CAQ54415.1 Putative minor tail protein z [Wolbachia endosymbiont of Culex quinquefasciatus Pel], CAQ54438.1 Putative minor tail protein z [Wolbachia endosymbiont of Culex quinquefasciatus Pel], CAQ54529.1 Putative minor tail protein Z [Wolbachia endosymbiont of Culex quinquefasciatus Pel], CAQ55407.1 P…	WP_010962479.1 MULTISPECIES_ phage tail protein [Wolbachia]	WP_019236396.1 tail protein [Wolbachia pipientis], WP_019236418.1 tail protein [Wolbachia pipientis], WP_026097194.1 tail protein [Wolbachia pipientis], WP_026097277.1 tail protein [Wolbachia pipientis]		wFol_05850 wFol_05850 Putative phage minor tail protein Z 693723_694235 forward MW_19216, wFol_06130 wFol_06130 Putative phage minor tail protein Z 722992_723507 forward MW_19174, wFol_09390 wFol_09390 Putative minor tail protein Z 1120609_1121124 reverse MW_19342						OG0000047	0	0	0	0	2	2	2	3	2	5	1	4	0	3	0	0	0	0		1.33333	1.6088		OG0000047	-0.828775	-0.828775	-0.828775	-0.828775	0.414388	0.414388
OG0000048				BAP00328.1 phage uncharacterized protein [Wolbachia endosymbiont of Cimex lectularius]	CDR79096.1 phage protein_Transposase and inactivated derivatives_phage uncharacterized protein_ C-terminal domain_Terminase-like family [Wolbachia], CDR79199.1 phage protein_Transposase and inactivated derivatives [Wolbachia], CDR79200.1 phage uncharacterized protein_Transposase and inactivated derivatives [Wolbachia], CDR79281.1 phage protein_Transposase and inactivated derivatives_phage unchara…	AAS14676.1 phage uncharacterized protein [Wolbachia endosymbiont of Drosophila melanogaster], AAS14783.1 phage uncharacterized protein [Wolbachia endosymbiont of Drosophila melanogaster]	AGK00272.1 Putative phage terminase [Wolbachia endosymbiont of Drosophila simulans wHa], AGK00363.1 Putative phage terminase [Wolbachia endosymbiont of Drosophila simulans wHa]	ACN95424.1 phage uncharacterized protein [Wolbachia sp. wRi], ACN95681.1 phage uncharacterized protein [Wolbachia sp. wRi]	AGJ99165.1 Putative phage terminase [Wolbachia endosymbiont of Drosophila simulans wNo]	CAQ55121.1 phage uncharacterized protein [Wolbachia endosymbiont of Culex quinquefasciatus Pel], CAQ55153.1 phage uncharacterized protein [Wolbachia endosymbiont of Culex quinquefasciatus Pel]		WP_012481972.1 MULTISPECIES_ hypothetical protein [Wolbachia], WP_012481978.1 MULTISPECIES_ hypothetical protein [Wolbachia]	WP_047759411.1 phage terminase [Wolbachia endosymbiont of Armadillidium vulgare], WP_047759477.1 phage terminase [Wolbachia endosymbiont of Armadillidium vulgare]	wFol_10750 wFol_10750 Putative terminase 1289676_1291238 reverse MW_59669	OCA06514.1 terminase-like family protein [Wolbachia endosymbiont of Trichogramma pretiosum], OCA06515.1 hypothetical protein wTpre_850 [Wolbachia endosymbiont of Trichogramma pretiosum]		ONI56177.1 hypothetical protein N500_0750 [Wolbachia pipientis wUni], ONI56259.1 hypothetical protein N500_0675 [Wolbachia pipientis wUni]			OG0000048	0	0	0	1	5	2	2	2	1	2	0	2	2	1	2	0	2	0		1.33333	1.28338		OG0000048	-1.03892	-1.03892	-1.03892	-0.259731	2.85704	0.519462
OG0000049		WP_025264385.1 MULTISPECIES_ hypothetical protein [Wolbachia]	gi|58584656|ref|YP_198229.1| hypothetical protein Wbm0399 [Wolbachia endosymbiont strain TRS of Brugia malayi]	BAP00443.1 putative membrane protein [Wolbachia endosymbiont of Cimex lectularius]	CDR79234.1 hypothetical protein WPAU_0863 [Wolbachia]	AAS14556.1 hypothetical protein WD_0872 [Wolbachia endosymbiont of Drosophila melanogaster]	AGJ99827.1 hypothetical protein wHa_03590 [Wolbachia endosymbiont of Drosophila simulans wHa], AGK00185.1 hypothetical protein wHa_07530 [Wolbachia endosymbiont of Drosophila simulans wHa]	ACN95575.1 hypothetical protein WRi_008370 [Wolbachia sp. wRi]	AGJ98670.1 hypothetical protein wNo_02360 [Wolbachia endosymbiont of Drosophila simulans wNo]	CAQ54536.1 Putative membrane protein [Wolbachia endosymbiont of Culex quinquefasciatus Pel], CAQ54782.1 Putative membrane protein [Wolbachia endosymbiont of Culex quinquefasciatus Pel]	WP_038199169.1 hypothetical protein [Wolbachia pipientis]	WP_019236404.1 hypothetical protein_ partial [Wolbachia pipientis], WP_019236427.1 hypothetical protein_ partial [Wolbachia pipientis], WP_019236706.1 hypothetical protein [Wolbachia pipientis]	WP_047759175.1 membrane protein [Wolbachia endosymbiont of Armadillidium vulgare], WP_047759322.1 hypothetical protein_ partial [Wolbachia endosymbiont of Armadillidium vulgare], WP_047759663.1 membrane protein [Wolbachia endosymbiont of Armadillidium vulgare]	wFol_02230 wFol_02230 Putative membrane protein 259195_260655 forward MW_53195	OCA05686.1 hypothetical protein wTpre_4 [Wolbachia endosymbiont of Trichogramma pretiosum]	wLcla12400 wLcla12400 Putative membrane protein 1144742_1146004 reverse MW_46580	ONI56144.1 hypothetical protein N500_0784 [Wolbachia pipientis wUni]	OEY87035.1 hypothetical protein BIY23_00915 [Wolbachia pipientis], OEY87040.1 hypothetical protein BIY23_00940 [Wolbachia pipientis]		OG0000049	0	1	1	1	1	1	2	1	1	2	1	3	3	1	1	1	1	2		1.33333	0.766965		OG0000049	-1.73845	-0.434613	-0.434613	-0.434613	-0.434613	-0.434613
OG0000050	wOo_07430 wOo_07430 Outer surface protein Wsp 674844_675554 reverse MW_25467	WP_014869105.1 MULTISPECIES_ P44/Msp2 family outer membrane protein [Wolbachia]	gi|58584689|ref|YP_198262.1| Outer surface protein Wsp [Wolbachia endosymbiont strain TRS of Brugia malayi]	BAO99343.1 outer surface protein Wsp [Wolbachia endosymbiont of Cimex lectularius]	CDR79385.1 surface antigen Wsp_Major surface antigen 4 precursor_Opacity protein and related surface antigens_Surface antigen [Wolbachia]	AAS14719.1 surface antigen Wsp [Wolbachia endosymbiont of Drosophila melanogaster]	AGK00307.1 Surface antigen Wsp [Wolbachia endosymbiont of Drosophila simulans wHa]	ACN95796.1 surface antigen Wsp [Wolbachia sp. wRi]	AGJ99006.1 Surface antigen Wsp [Wolbachia endosymbiont of Drosophila simulans wNo]	CAQ55045.1 surface antigen Wsp [Wolbachia endosymbiont of Culex quinquefasciatus Pel]	WP_038199345.1 P44/Msp2 family outer membrane protein [Wolbachia pipientis]	WP_007302328.1 MULTISPECIES_ P44/Msp2 family outer membrane protein [Wolbachia]	WP_047759580.1 Surface antigen Wsp [Wolbachia endosymbiont of Armadillidium vulgare]	wFol_02470 wFol_02470 Surface antigen-related protein 288422_289042 forward MW_23300, wFol_02480 wFol_02480 Putative outer membrane protein 289066_289803 forward MW_27194, wFol_05070 wFol_05070 Outer membrane protein 621220_621828 forward MW_22417, wFol_08590 wFol_08590 Surface antigen-related protein 1024527_1025249 reverse MW_26932, wFol_13090 wFol_13090 Surface antigen-related protein 1554929_…	OCA06744.1 outer membrane beta-barrel domain protein [Wolbachia endosymbiont of Trichogramma pretiosum]	wLcla08280 wsp Outer surface protein _Fragment_ 755041_755721 reverse MW_24057		OEY86421.1 hypothetical protein BIY23_04320 [Wolbachia pipientis], OEY86608.1 hypothetical protein BIY23_02780 [Wolbachia pipientis], OEY86786.1 hypothetical protein BIY23_02010 [Wolbachia pipientis]		OG0000050	1	1	1	1	1	1	1	1	1	1	1	1	1	6	1	1	0	3		1.33333	1.28338		OG0000050	-0.259731	-0.259731	-0.259731	-0.259731	-0.259731	-0.259731
OG0000051	wOo_09590 wOo_09590 cardiolipin synthase 869704_870237 forward MW_20284	WP_025264160.1 MULTISPECIES_ nuclease [Wolbachia]	gi|58584636|ref|YP_198209.1| Cardiolipin synthase family enzyme [Wolbachia endosymbiont strain TRS of Brugia malayi]	BAO99476.1 putative endonuclease protein [Wolbachia endosymbiont of Cimex lectularius]	CDR79594.1 nuclease-related protein_Phospholipase D precursor_nuclease NucT [Wolbachia]	AAS14889.1 nuclease-related protein [Wolbachia endosymbiont of Drosophila melanogaster]	AGK00446.1 Putative endonuclease [Wolbachia endosymbiont of Drosophila simulans wHa]	ACN95902.1 nuclease-related protein [Wolbachia sp. wRi]	AGJ98614.1 Putative endonuclease protein [Wolbachia endosymbiont of Drosophila simulans wNo]	CAQ54379.1 Putative endonuclease [Wolbachia endosymbiont of Culex quinquefasciatus Pel], CAQ54562.1 Putative endonuclease protein [Wolbachia endosymbiont of Culex quinquefasciatus Pel], CAQ54618.1 Putative endonuclease protein [Wolbachia endosymbiont of Culex quinquefasciatus Pel], CAQ55446.1 Putative endonuclease [Wolbachia endosymbiont of Culex quinquefasciatus Pel]	WP_038199608.1 nuclease [Wolbachia pipientis]	WP_007301949.1 MULTISPECIES_ nuclease [Wolbachia], WP_026097223.1 nuclease [Wolbachia pipientis], WP_038197876.1 nuclease [Wolbachia pipientis]	WP_047759111.1 nuclease [Wolbachia endosymbiont of Armadillidium vulgare]	wFol_03210 wFol_03210 Phospholipase D-like protein 382388_382903 forward MW_19559, wFol_05420 wFol_05420 Phospholipase D-like protein 657010_657525 forward MW_19541, wFol_09820 wFol_09820 Putative endonuclease 1161241_1161750 reverse MW_19355	OCA05735.1 PLD-like domain protein [Wolbachia endosymbiont of Trichogramma pretiosum]	wLcla00770 wLcla00770 Putative endonuclease protein 60716_61243 forward MW_19813	ONI55862.1 endonuclease [Wolbachia pipientis wUni]			OG0000051	1	1	1	1	1	1	1	1	1	4	1	3	1	3	1	1	1	0		1.33333	0.970143		OG0000051	-0.343592	-0.343592	-0.343592	-0.343592	-0.343592	-0.343592
OG0000052					CDR78628.1 transposase_ truncation [Wolbachia]	AAS13995.1 transposase_ IS256 family [Wolbachia endosymbiont of Drosophila melanogaster], AAS14268.1 transposase_ truncation [Wolbachia endosymbiont of Drosophila melanogaster]				CAQ54623.1 transposase [Wolbachia endosymbiont of Culex quinquefasciatus Pel], CAQ55340.1 transposase [Wolbachia endosymbiont of Culex quinquefasciatus Pel], CAQ55356.1 transposase [Wolbachia endosymbiont of Culex quinquefasciatus Pel], CAQ55369.1 transposase [Wolbachia endosymbiont of Culex quinquefasciatus Pel], CAQ55466.1 transposase [Wolbachia endosymbiont of Culex quinquefasciatus Pel]	WP_010962677.1 MULTISPECIES_ transposase_ partial [Wolbachia]	WP_019236801.1 MULTISPECIES_ hypothetical protein [Wolbachia], WP_019236803.1 MULTISPECIES_ transposase [Wolbachia]	WP_047758841.1 transposase [Wolbachia endosymbiont of Armadillidium vulgare], WP_047758967.1 hypothetical protein [Wolbachia endosymbiont of Armadillidium vulgare], WP_047759305.1 transposase [Wolbachia endosymbiont of Armadillidium vulgare]	wFol_06260 wFol_06260 Transposase_ IS256 family 735037_736257 forward MW_46471, wFol_10600 wFol_10600 Transposase_ IS256 family 1258327_1259547 forward MW_46471	OCA06638.1 transposase_ Mutator family protein [Wolbachia endosymbiont of Trichogramma pretiosum], OCA06639.1 transposase_ IS256 family domain protein [Wolbachia endosymbiont of Trichogramma pretiosum], OCA06640.1 transposase_ Mutator family protein [Wolbachia endosymbiont of Trichogramma pretiosum], OCA06641.1 hypothetical protein wTpre_981 [Wolbachia endosymbiont of Trichogramma pretiosum]	wLcla01090 wLcla01090 Transposase_ IS256 family 90202_90378 reverse MW_6562	ONI56632.1 PQQ enzyme repeat family protein [Wolbachia pipientis wUni], ONI56642.1 putative transposase [Wolbachia pipientis wUni]			OG0000052	0	0	0	0	1	2	0	0	0	5	1	2	3	2	4	1	2	0		1.27778	1.52646		OG0000052	-0.837088	-0.837088	-0.837088	-0.837088	-0.181976	0.473137
OG0000053				BAO99504.1 putative site-specific recombinase [Wolbachia endosymbiont of Cimex lectularius], BAO99988.1 putative site-specific recombinase [Wolbachia endosymbiont of Cimex lectularius], BAP00118.1 putative site-specific recombinase [Wolbachia endosymbiont of Cimex lectularius]	CDR78637.1 Putative site-specific recombinase [Wolbachia], CDR78923.1 Putative site-specific recombinase [Wolbachia]	AAS14232.1 conserved domain protein [Wolbachia endosymbiont of Drosophila melanogaster], AAS14260.1 hypothetical protein WD_0552 [Wolbachia endosymbiont of Drosophila melanogaster]	AGJ99810.1 Putative site-specific recombinase_ resolvase family [Wolbachia endosymbiont of Drosophila simulans wHa]	ACN95504.1 Putative cassette chromosome recombinase resolvase_ CcrB-like protein [Wolbachia sp. wRi], ACN95928.1 Putative site-specific recombinase [Wolbachia sp. wRi]			WP_038198892.1 hypothetical protein [Wolbachia pipientis]	WP_019236387.1 hypothetical protein [Wolbachia pipientis]	WP_047759186.1 hypothetical protein [Wolbachia endosymbiont of Armadillidium vulgare], WP_047759187.1 hypothetical protein [Wolbachia endosymbiont of Armadillidium vulgare], WP_047759365.1 hypothetical protein_ partial [Wolbachia endosymbiont of Armadillidium vulgare], WP_047759649.1 hypothetical protein [Wolbachia endosymbiont of Armadillidium vulgare]	wFol_02740 wFol_02740 Putative resolvase 320597_320974 reverse MW_14783, wFol_09290 wFol_09290 Putative resolvase 1113395_1113751 reverse MW_13622	OCA07037.1 hypothetical protein wTpre_1393 [Wolbachia endosymbiont of Trichogramma pretiosum], OCA07038.1 recombinase family protein [Wolbachia endosymbiont of Trichogramma pretiosum], OCA07039.1 resolvase_ N terminal domain protein [Wolbachia endosymbiont of Trichogramma pretiosum]		ONI56856.1 hypothetical protein N500_0053 [Wolbachia pipientis wUni]	OEY87048.1 hypothetical protein BIY23_00985 [Wolbachia pipientis]		OG0000053	0	0	0	3	2	2	1	2	0	0	1	1	4	2	3	0	1	1		1.27778	1.22741		OG0000053	-1.04104	-1.04104	-1.04104	1.40313	0.588411	0.588411
OG0000054	wOo_04220 wOo_04220 UDP-N-acetylmuramate-alanine ligase 360462_361925 forward MW_53191	WP_029784330.1 UDP-N-acetylmuramate--alanine ligase [Wolbachia endosymbiont of Onchocerca volvulus]	gi|58584378|ref|YP_197951.1| UDP-N-acetylmuramate-alanine ligase [Wolbachia endosymbiont strain TRS of Brugia malayi]	BAP00412.1 UDP-N-acetylmuramate-alanine ligase [Wolbachia endosymbiont of Cimex lectularius]	CDR78915.1 UDP-N-acetylmuramate--alanine ligase_UDP-N-acetylmuramate--L-alanine ligase_UDP-N-acetylmuramate--L-alanine ligase_Folylpolyglutamate synthase_UDP-N-acetylmuramate--alanine ligase_Mur ligase middle domain [Wolbachia]	AAS14212.1 UDP-N-acetylmuramate--alanine ligase [Wolbachia endosymbiont of Drosophila melanogaster]	AGJ99757.1 UDP-N-acetylmuramate--L-alanine ligase [Wolbachia endosymbiont of Drosophila simulans wHa]	ACN95075.1 UDP-N-acetylmuramate-alanine ligase [Wolbachia sp. wRi]	AGJ98520.1 UDP-N-acetylmuramate--alanine ligase [Wolbachia endosymbiont of Drosophila simulans wNo], AGJ99332.1 MurC-like protein [Wolbachia endosymbiont of Drosophila simulans wNo]	CAQ54315.1 murC-like protein [Wolbachia endosymbiont of Culex quinquefasciatus Pel]	WP_038198849.1 UDP-N-acetylmuramate--L-alanine ligase [Wolbachia pipientis]	WP_007302831.1 MULTISPECIES_ UDP-N-acetylmuramate--alanine ligase [Wolbachia], WP_012481759.1 MULTISPECIES_ murC [Wolbachia]	WP_047759065.1 UDP-N-acetylmuramate--alanine ligase [Wolbachia endosymbiont of Armadillidium vulgare], WP_047759074.1 murC [Wolbachia endosymbiont of Armadillidium vulgare]	wFol_11400 murC UDP-N-acetylmuramate--L-alanine ligase 1358038_1359852 forward MW_65612	OCA06144.1 mur ligase middle domain protein [Wolbachia endosymbiont of Trichogramma pretiosum], OCA06183.1 mur ligase family_ glutamate ligase domain protein [Wolbachia endosymbiont of Trichogramma pretiosum]	wLcla00330 murC UDP-N-acetylmuramate--L-alanine ligase 25361_26359 forward MW_37328, wLcla03910 murC UDP-N-acetylmuramate--L-alanine ligase 337666_338622 reverse MW_34892	ONI56605.1 UDP-N-acetylmuramate--alanine ligase [Wolbachia pipientis wUni]	OEY86695.1 UDP-N-acetylmuramate--L-alanine ligase [Wolbachia pipientis]		OG0000054	1	1	1	1	1	1	1	1	2	1	1	2	2	1	2	2	1	1		1.27778	0.460889		OG0000054	-0.6027	-0.6027	-0.6027	-0.6027	-0.6027	-0.6027
OG0000055	wOo_01730 wOo_01730 DNA mismatch repair ATPase MutL 158857_160722 reverse MW_70421	WP_025264287.1 DNA mismatch repair protein MutL [Wolbachia endosymbiont of Onchocerca volvulus]	gi|58584653|ref|YP_198226.1| DNA mismatch repair enzyme MutL_ predicted ATPase [Wolbachia endosymbiont strain TRS of Brugia malayi]	BAP00225.1 DNA mismatch repair protein MutL-1 [Wolbachia endosymbiont of Cimex lectularius]	CDR79070.1 DNA mismatch repair protein_DNA mismatch repair protein mutL_DNA mismatch repair protein_DNA mismatch repair enzyme _predicted ATPase__DNA mismatch repair protein MutL_MutL C terminal dimerisation domain [Wolbachia], CDR79652.1 DNA mismatch repair protein_DNA mismatch repair protein mutL_DNA mismatch repair protein_DNA mismatch repair enzyme _predicted ATPase__DNA mismatch repair prote…	AAS14224.1 DNA mismatch repair protein MutL-2 [Wolbachia endosymbiont of Drosophila melanogaster], AAS14948.1 DNA mismatch repair protein MutL-1 [Wolbachia endosymbiont of Drosophila melanogaster]	AGJ99853.1 DNA mismatch repair protein MutL 1 [Wolbachia endosymbiont of Drosophila simulans wHa], AGK00497.1 DNA mismatch repair protein MutL 2 [Wolbachia endosymbiont of Drosophila simulans wHa]	ACN96007.1 DNA mismatch repair protein MutL [Wolbachia sp. wRi]	AGJ98651.1 DNA mismatch repair protein MutL 1 [Wolbachia endosymbiont of Drosophila simulans wNo], AGJ99026.1 DNA mismatch repair protein MutL 2 [Wolbachia endosymbiont of Drosophila simulans wNo]	CAQ54386.1 DNA mismatch repair protein MutL [Wolbachia endosymbiont of Culex quinquefasciatus Pel], CAQ55164.1 DNA mismatch repair protein MutL [Wolbachia endosymbiont of Culex quinquefasciatus Pel]	WP_038198460.1 DNA mismatch repair protein MutL [Wolbachia pipientis]	WP_019236881.1 DNA mismatch repair protein MutL [Wolbachia pipientis], WP_019236983.1 DNA mismatch repair protein MutL_ partial [Wolbachia pipientis]		wFol_11410 mutL DNA mismatch repair protein MutL 1360160_1361998 reverse MW_69399	OCA06429.1 DNA mismatch repair MutL family protein [Wolbachia endosymbiont of Trichogramma pretiosum]	wLcla06110 mutL DNA mismatch repair protein MutL 566893_568719 forward MW_69366	ONI55775.1 DNA mismatch repair protein MutL family protein [Wolbachia pipientis wUni]	OEY86988.1 DNA mismatch repair protein MutL [Wolbachia pipientis]		OG0000055	1	1	1	1	2	2	2	1	2	2	1	2	0	1	1	1	1	1		1.27778	0.574513		OG0000055	-0.483501	-0.483501	-0.483501	-0.483501	1.2571	1.2571
OG0000056	wOo_00050 wOo_00050 PQQ-like beta-propeller repeat-containing protein 3071_4180 reverse MW_41384	WP_025264217.1 dehydrogenase [Wolbachia endosymbiont of Onchocerca volvulus]	gi|58584290|ref|YP_197863.1| hypothetical protein Wbm0029 [Wolbachia endosymbiont strain TRS of Brugia malayi], gi|58584291|ref|YP_197864.1| hypothetical protein Wbm0030 [Wolbachia endosymbiont strain TRS of Brugia malayi], gi|58584817|ref|YP_198390.1| PQQ-like beta-propeller repeat-containing protein [Wolbachia endosymbiont strain TRS of Brugia malayi]	BAO99591.1 PQQ enzyme repeat family protein [Wolbachia endosymbiont of Cimex lectularius]	CDR79128.1 PQQ enzyme repeat family protein_Lipoprotein yfgL precursor_outer membrane biogenesis protein BamB_Glucose dehydrogenase_outer membrane assembly lipoprotein YfgL_PQQ enzyme repeat [Wolbachia]	AAS14440.1 PQQ enzyme repeat family protein [Wolbachia endosymbiont of Drosophila melanogaster]	AGK00078.1 PQQ enzyme repeat family protein [Wolbachia endosymbiont of Drosophila simulans wHa]	ACN95479.1 PQQ enzyme repeat family protein [Wolbachia sp. wRi], ACN95936.1 PQQ enzyme repeat family protein [Wolbachia sp. wRi]	AGJ98493.1 PQQ enzyme repeat family protein [Wolbachia endosymbiont of Drosophila simulans wNo]	CAQ54202.1 PQQ enzyme repeat family protein [Wolbachia endosymbiont of Culex quinquefasciatus Pel]	WP_038199035.1 dehydrogenase [Wolbachia pipientis]	WP_007302753.1 MULTISPECIES_ dehydrogenase [Wolbachia]	WP_047759519.1 dehydrogenase [Wolbachia endosymbiont of Armadillidium vulgare]	wFol_07340 wFol_07340 PQQ enzyme repeat family protein 870538_871641 forward MW_40603	OCA05935.1 PQQ enzyme repeat family protein [Wolbachia endosymbiont of Trichogramma pretiosum]	wLcla02150 wLcla02150 PQQ enzyme repeat family protein 184442_185551 forward MW_41655	ONI56221.1 PQQ enzyme repeat family protein [Wolbachia pipientis wUni], ONI56222.1 PQQ enzyme repeat family protein [Wolbachia pipientis wUni]	OEY86721.1 hypothetical protein BIY23_02590 [Wolbachia pipientis], OEY86816.1 hypothetical protein BIY23_02180 [Wolbachia pipientis]		OG0000056	1	1	3	1	1	1	1	2	1	1	1	1	1	1	1	1	2	2		1.27778	0.574513		OG0000056	-0.483501	-0.483501	2.99771	-0.483501	-0.483501	-0.483501
OG0000057	wOo_04690 wOo_04690 hypothetical protein 400147_401157 reverse MW_38214	WP_025263939.1 hypothetical protein [Wolbachia endosymbiont of Onchocerca volvulus]	gi|58584511|ref|YP_198084.1| hypothetical protein Wbm0253 [Wolbachia endosymbiont strain TRS of Brugia malayi]	BAP00408.1 putative uncharacterized protein [Wolbachia endosymbiont of Cimex lectularius]	CDR79258.1 hypothetical protein WPAU_0887 [Wolbachia], CDR79259.1 hypothetical protein WPAU_0888 [Wolbachia]	AAS14765.1 hypothetical protein WD_1111 [Wolbachia endosymbiont of Drosophila melanogaster]	AGK00345.1 hypothetical protein wHa_09300 [Wolbachia endosymbiont of Drosophila simulans wHa]		AGJ98967.1 hypothetical protein wNo_05470 [Wolbachia endosymbiont of Drosophila simulans wNo]	CAQ54140.1 hypothetical protein WP0031 [Wolbachia endosymbiont of Culex quinquefasciatus Pel], CAQ54174.1 hypothetical protein WP0065 [Wolbachia endosymbiont of Culex quinquefasciatus Pel], CAQ54976.1 hypothetical protein WP0868 [Wolbachia endosymbiont of Culex quinquefasciatus Pel]	WP_051955857.1 hypothetical protein [Wolbachia pipientis]	WP_007302842.1 MULTISPECIES_ hypothetical protein [Wolbachia], WP_019236342.1 hypothetical protein [Wolbachia pipientis], WP_019236867.1 hypothetical protein [Wolbachia pipientis]		wFol_08550 wFol_08550 Uncharacterized protein 1020962_1021867 forward MW_34841, wFol_11200 wFol_11200 Uncharacterized protein 1339939_1340772 forward MW_31126, wFol_14470 wFol_14470 Uncharacterized protein 1727095_1727958 forward MW_32152	OCA06007.1 hypothetical protein wTpre_328 [Wolbachia endosymbiont of Trichogramma pretiosum], OCA06008.1 hypothetical protein wTpre_329 [Wolbachia endosymbiont of Trichogramma pretiosum]	wLcla07600 wLcla07600 Uncharacterized protein 698440_699417 reverse MW_36456		OEY87054.1 hypothetical protein BIY23_01020 [Wolbachia pipientis]		OG0000057	1	1	1	1	2	1	1	0	1	3	1	3	0	3	2	1	0	1		1.27778	0.95828		OG0000057	-0.289871	-0.289871	-0.289871	-0.289871	0.753665	-0.289871
OG0000058			gi|58584270|ref|YP_197843.1| hypothetical protein Wbm0009 [Wolbachia endosymbiont strain TRS of Brugia malayi], gi|58584395|ref|YP_197968.1| hypothetical protein Wbm0135 [Wolbachia endosymbiont strain TRS of Brugia malayi]	BAO99602.1 putative uncharacterized protein [Wolbachia endosymbiont of Cimex lectularius], BAO99603.1 putative lipase [Wolbachia endosymbiont of Cimex lectularius], BAP00188.1 putative lipase [Wolbachia endosymbiont of Cimex lectularius]					AGJ98801.1 Putative Triglyceride lipase [Wolbachia endosymbiont of Drosophila simulans wNo], AGJ99483.1 Putative lipase [Wolbachia endosymbiont of Drosophila simulans wNo]	CAQ54815.1 putative lipase [Wolbachia endosymbiont of Culex quinquefasciatus Pel], CAQ54816.1 Hypothetical protein WP0708 [Wolbachia endosymbiont of Culex quinquefasciatus Pel]		WP_007302125.1 MULTISPECIES_ lipase [Wolbachia], WP_019236352.1 MULTISPECIES_ hypothetical protein [Wolbachia]	WP_047759233.1 lipase [Wolbachia endosymbiont of Armadillidium vulgare], WP_047759823.1 lipase [Wolbachia endosymbiont of Armadillidium vulgare]	wFol_01680 wFol_01680 Putative triglyceride lipase 193704_195032 reverse MW_49833	OCA06090.1 putative lipase domain protein [Wolbachia endosymbiont of Trichogramma pretiosum], OCA06091.1 putative lipase domain protein [Wolbachia endosymbiont of Trichogramma pretiosum], OCA06092.1 lipase family protein [Wolbachia endosymbiont of Trichogramma pretiosum], OCA06440.1 hypothetical protein wTpre_775 [Wolbachia endosymbiont of Trichogramma pretiosum], OCA06812.1 hypothetical protein …	wLcla09570 wLcla09570 Putative triglyceride lipase 871285_872577 reverse MW_48538		OEY86712.1 hypothetical protein BIY23_02530 [Wolbachia pipientis]		OG0000058	0	0	2	3	0	0	0	0	2	2	0	2	2	1	7	1	0	1		1.27778	1.7424		OG0000058	-0.733345	-0.733345	0.414499	0.988421	-0.733345	-0.733345
OG0000059			gi|58584867|ref|YP_198440.1| hypothetical protein Wbm0610 [Wolbachia endosymbiont strain TRS of Brugia malayi]	BAO99687.1 putative membrane protein [Wolbachia endosymbiont of Cimex lectularius], BAO99900.1 putative membrane protein [Wolbachia endosymbiont of Cimex lectularius], BAP00347.1 hypothetical protein WCLE_010610 [Wolbachia endosymbiont of Cimex lectularius], BAP00513.1 putative uncharacterized protein [Wolbachia endosymbiont of Cimex lectularius]				ACN95110.1 hypothetical protein WRi_002900 [Wolbachia sp. wRi]	AGJ98584.1 hypothetical protein wNo_01430 [Wolbachia endosymbiont of Drosophila simulans wNo]	CAQ54580.1 Putative membrane protein [Wolbachia endosymbiont of Culex quinquefasciatus Pel], CAQ54812.1 Putative membrane protein [Wolbachia endosymbiont of Culex quinquefasciatus Pel]		WP_007301914.1 MULTISPECIES_ membrane protein [Wolbachia], WP_019236723.1 membrane protein [Wolbachia pipientis]		wFol_00420 wFol_00420 Putative membrane protein 54429_54905 reverse MW_17044, wFol_04040 wFol_04040 Putative membrane protein 489087_489704 forward MW_21998, wFol_04050 wFol_04050 Putative membrane protein 489949_490431 forward MW_15971, wFol_11240 wFol_11240 Putative membrane protein 1343948_1344505 reverse MW_19434, wFol_14220 wFol_14220 Putative membrane protein 1693582_1694109 forward MW_1844…	OCA06602.1 hypothetical protein wTpre_942 [Wolbachia endosymbiont of Trichogramma pretiosum], OCA06809.1 hypothetical protein wTpre_1158 [Wolbachia endosymbiont of Trichogramma pretiosum]			OEY86481.1 hypothetical protein BIY23_03560 [Wolbachia pipientis]		OG0000059	0	0	1	4	0	0	0	1	1	2	0	2	0	9	2	0	0	1		1.27778	2.21772		OG0000059	-0.576166	-0.576166	-0.125254	1.22748	-0.576166	-0.576166
OG0000060			gi|58584861|ref|YP_198434.1| hypothetical protein Wbm0604 [Wolbachia endosymbiont strain TRS of Brugia malayi]		CDR78451.1 ompA-like protein [Wolbachia]	AAS13824.1 hypothetical protein WD_0061 [Wolbachia endosymbiont of Drosophila melanogaster]	AGJ99542.1 OmpA-like protein [Wolbachia endosymbiont of Drosophila simulans wHa]	ACN94916.1 hypothetical protein WRi_000490 [Wolbachia sp. wRi]	AGJ98830.1 OmpA-like protein [Wolbachia endosymbiont of Drosophila simulans wNo]	CAQ54850.1 ompA-like protein [Wolbachia endosymbiont of Culex quinquefasciatus Pel], CAQ54851.1 ompA-like protein [Wolbachia endosymbiont of Culex quinquefasciatus Pel]	WP_010962341.1 MULTISPECIES_ membrane protein [Wolbachia]	WP_026097243.1 membrane protein [Wolbachia pipientis], WP_026097244.1 cell envelope biogenesis protein OmpA [Wolbachia pipientis]	WP_047759853.1 membrane protein [Wolbachia endosymbiont of Armadillidium vulgare]	wFol_05060 wFol_05060 Outer membrane protein 620510_621133 forward MW_22219, wFol_14330 wFol_14330 Putative outer membrane protein/outer membrane enzyme PagP_ beta-barrel 1708865_1709464 forward MW_22316	OCA06851.1 hypothetical protein wTpre_1201 [Wolbachia endosymbiont of Trichogramma pretiosum], OCA06852.1 hypothetical protein wTpre_1202 [Wolbachia endosymbiont of Trichogramma pretiosum], OCA06853.1 hypothetical protein wTpre_1203 [Wolbachia endosymbiont of Trichogramma pretiosum], OCA06854.1 hypothetical protein wTpre_1204 [Wolbachia endosymbiont of Trichogramma pretiosum]	wLcla09910 wLcla09910 Outer membrane protein beta-barrel domain protein 904329_904925 forward MW_21076, wLcla09920 wLcla09920 Uncharacterized protein 905013_905534 forward MW_19151	ONI56816.1 hypothetical protein N500_0080 [Wolbachia pipientis wUni], ONI56817.1 hypothetical protein N500_0081 [Wolbachia pipientis wUni]			OG0000060	0	0	1	0	1	1	1	1	1	2	1	2	1	2	4	2	2	0		1.22222	1.00326		OG0000060	-1.21825	-1.21825	-0.2215	-1.21825	-0.2215	-0.2215
OG0000061					CDR78646.1 Ankyrin repeat domain protein [Wolbachia], CDR79067.1 Ankyrin repeat domain protein [Wolbachia]	AAS13998.1 hypothetical protein WD_0256 [Wolbachia endosymbiont of Drosophila melanogaster]		ACN95363.1 hypothetical protein WRi_005860 [Wolbachia sp. wRi], ACN95428.1 hypothetical protein WRi_006640 [Wolbachia sp. wRi], ACN95757.1 hypothetical protein WRi_010520 [Wolbachia sp. wRi]	AGJ98932.1 hypothetical protein wNo_05100 [Wolbachia endosymbiont of Drosophila simulans wNo]	CAQ54383.1 conserved hypothetical protein [Wolbachia endosymbiont of Culex quinquefasciatus Pel], CAQ54566.1 hypothetical protein WP0458 [Wolbachia endosymbiont of Culex quinquefasciatus Pel], CAQ55449.1 hypothetical protein WP1342 [Wolbachia endosymbiont of Culex quinquefasciatus Pel]		WP_019236553.1 hypothetical protein [Wolbachia pipientis]	WP_047759678.1 hypothetical protein [Wolbachia endosymbiont of Armadillidium vulgare]	wFol_00290 wFol_00290 Ankyrin repeat domain protein 33924_38447 reverse MW_168652, wFol_02670 wFol_02670 Uncharacterized protein 314535_315740 forward MW_44896, wFol_05290 wFol_05290 Uncharacterized protein 642628_643707 reverse MW_39612, wFol_06250 wFol_06250 Ankyrin repeat domain protein 731509_734907 forward MW_127446, wFol_06320 wFol_06320 Uncharacterized protein 754406_755467 reverse MW_3974…				OEY87152.1 hypothetical protein BIY23_01585 [Wolbachia pipientis], OEY87153.1 hypothetical protein BIY23_01590 [Wolbachia pipientis]		OG0000061	0	0	0	0	2	1	0	3	1	3	0	1	1	8	0	0	0	2		1.22222	1.98689		OG0000061	-0.615145	-0.615145	-0.615145	-0.615145	0.391456	-0.111845
OG0000062					CDR78687.1 terminase large subunit_ putative_Bacteriophage tail assembly protein_Phage terminase large subunit _GpA_ [Wolbachia], CDR79040.1 prophage LambdaW1_ terminase large subunit_Bacteriophage tail assembly protein_Phage terminase large subunit _GpA_ [Wolbachia]	AAS14005.1 prophage LambdaW1_ terminase large subunit_ putative [Wolbachia endosymbiont of Drosophila melanogaster], AAS14300.1 prophage LambdaW4_ terminase large subunit_ putative [Wolbachia endosymbiont of Drosophila melanogaster]	AGJ99717.1 Phage terminase large subunit [Wolbachia endosymbiont of Drosophila simulans wHa], AGJ99824.1 Phage terminase large subunit [Wolbachia endosymbiont of Drosophila simulans wHa]	ACN95338.1 putative phage terminase large subunit [Wolbachia sp. wRi], ACN95475.1 terminase large subunit_ putative [Wolbachia sp. wRi], ACN95732.1 putative phage terminase large subunit [Wolbachia sp. wRi], ACN95945.1 putative phage terminase large subunit [Wolbachia sp. wRi]	AGJ98568.1 Phage terminase large subunit GpA [Wolbachia endosymbiont of Drosophila simulans wNo], AGJ99296.1 phage terminase large subunit Gpa [Wolbachia endosymbiont of Drosophila simulans wNo]	CAQ54363.1 Phage terminase large subunit GpA [Wolbachia endosymbiont of Culex quinquefasciatus Pel], CAQ54422.1 Phage terminase large subunit GpA [Wolbachia endosymbiont of Culex quinquefasciatus Pel], CAQ55415.1 Phage terminase large subunit GpA [Wolbachia endosymbiont of Culex quinquefasciatus Pel]		WP_019236403.1 hypothetical protein_ partial [Wolbachia pipientis], WP_019236424.1 hypothetical protein_ partial [Wolbachia pipientis]	WP_047759255.1 bacteriophage tail assembly protein [Wolbachia endosymbiont of Armadillidium vulgare], WP_047759509.1 bacteriophage tail assembly protein [Wolbachia endosymbiont of Armadillidium vulgare]	wFol_05760 wFol_05760 Phage terminase large subunit GpA 686563_688389 forward MW_68906, wFol_06060 wFol_06060 Phage terminase large subunit GpA 716312_718141 forward MW_69235, wFol_09470 wFol_09470 Phage terminase large subunit GpA 1126714_1128534 reverse MW_68772						OG0000062	0	0	0	0	2	2	2	4	2	3	0	2	2	3	0	0	0	0		1.22222	1.3528		OG0000062	-0.903477	-0.903477	-0.903477	-0.903477	0.57494	0.57494
OG0000063					CDR78691.1 portal protein_ lambda family_phage portal protein_ lambda family_Phage portal protein_ lambda family [Wolbachia], CDR79034.1 portal protein_ lambda family_phage portal protein_ lambda family_Phage portal protein_ lambda family [Wolbachia]		AGJ99823.1 Putative phage portal protein_ lambda family [Wolbachia endosymbiont of Drosophila simulans wHa]	ACN95334.1 portal protein_ lambda family [Wolbachia sp. wRi], ACN95472.1 portal protein_ lambda family [Wolbachia sp. wRi], ACN95728.1 prophage portal protein_ lambda family [Wolbachia sp. wRi], ACN95942.1 portal protein_ lambda family [Wolbachia sp. wRi]	AGJ99299.1 Phage portal protein [Wolbachia endosymbiont of Drosophila simulans wNo]	CAQ54361.1 Putative phage portal protein [Wolbachia endosymbiont of Culex quinquefasciatus Pel], CAQ54420.1 Putative phage portal protein [Wolbachia endosymbiont of Culex quinquefasciatus Pel], CAQ54433.1 Putative phage portal protein [Wolbachia endosymbiont of Culex quinquefasciatus Pel], CAQ55412.1 Putative phage portal protein [Wolbachia endosymbiont of Culex quinquefasciatus Pel]		WP_019236401.1 phage portal protein [Wolbachia pipientis], WP_019236421.1 phage portal protein [Wolbachia pipientis], WP_019236542.1 phage portal protein_ partial [Wolbachia pipientis], WP_038197628.1 phage portal protein_ partial [Wolbachia pipientis]	WP_047759253.1 portal protein [Wolbachia endosymbiont of Armadillidium vulgare], WP_047759507.1 portal protein [Wolbachia endosymbiont of Armadillidium vulgare], WP_047759661.1 portal protein [Wolbachia endosymbiont of Armadillidium vulgare]	wFol_05800 wFol_05800 Putative phage portal protein_ lambda family 689334_690746 forward MW_53541, wFol_06080 wFol_06080 Putative phage portal protein_ lambda family 718546_719958 forward MW_53209, wFol_09440 wFol_09440 Phage portal protein_ lambda family 1124030_1125436 reverse MW_53201						OG0000063	0	0	0	0	2	0	1	4	1	4	0	4	3	3	0	0	0	0		1.22222	1.62899		OG0000063	-0.750296	-0.750296	-0.750296	-0.750296	0.477461	-0.750296
OG0000064					CDR78922.1 RNA-directed DNA polymerase _Reverse transcriptase__Group II intron-encoded protein ltrA_Retron-type reverse transcriptase_Reverse transcriptase _RNA-dependent DNA polymerase_ [Wolbachia], CDR79046.1 RNA-directed DNA polymerase _Reverse transcriptase__Group II intron-encoded protein ltrA_Retron-type reverse transcriptase_Reverse transcriptase _RNA-dependent DNA polymerase_ [Wolbachia]	AAS14229.1 reverse transcriptase_ interruption-C [Wolbachia endosymbiont of Drosophila melanogaster], AAS14344.1 reverse transcriptase_ truncation [Wolbachia endosymbiont of Drosophila melanogaster]	AGJ99699.1 Group II intron encoded reverse transcriptase [Wolbachia endosymbiont of Drosophila simulans wHa], AGJ99712.1 Group II intron encoded reverse transcriptase [Wolbachia endosymbiont of Drosophila simulans wHa]	ACN95344.1 RNA-directed DNA polymerase _Reverse transcriptase_ [Wolbachia sp. wRi], ACN95738.1 RNA-directed DNA polymerase _Reverse transcriptase_ [Wolbachia sp. wRi]	AGJ98650.1 Putative reverse transcriptase [Wolbachia endosymbiont of Drosophila simulans wNo]	CAQ54277.1 Putative reverse transcriptase [Wolbachia endosymbiont of Culex quinquefasciatus Pel], CAQ54388.1 putative reverse transcriptase [Wolbachia endosymbiont of Culex quinquefasciatus Pel], CAQ54446.1 reverse transcriptase [Wolbachia endosymbiont of Culex quinquefasciatus Pel], CAQ55080.1 Putative reverse transcriptase [Wolbachia endosymbiont of Culex quinquefasciatus Pel], CAQ55084.1 Putat…	WP_038198854.1 group II intron reverse transcriptase/maturase [Wolbachia pipientis]		WP_047759364.1 DNA polymerase_ partial [Wolbachia endosymbiont of Armadillidium vulgare], WP_047759367.1 DNA polymerase_ partial [Wolbachia endosymbiont of Armadillidium vulgare]		OCA06220.1 reverse transcriptase family protein [Wolbachia endosymbiont of Trichogramma pretiosum], OCA06221.1 reverse transcriptase family protein [Wolbachia endosymbiont of Trichogramma pretiosum], OCA06222.1 hypothetical protein wTpre_547 [Wolbachia endosymbiont of Trichogramma pretiosum]		ONI56078.1 RNA-directed DNA polymerase domain protein [Wolbachia pipientis wUni], ONI56206.1 hypothetical protein N500_0722_ partial [Wolbachia pipientis wUni]			OG0000064	0	0	0	0	2	2	2	2	1	5	1	0	2	0	3	0	2	0		1.22222	1.3956		OG0000064	-0.875765	-0.875765	-0.875765	-0.875765	0.557305	0.557305
OG0000065	wOo_06920 wOo_06920 NAD-dependent DNA ligase Lig 617996_620047 reverse MW_77037	WP_025264046.1 DNA ligase _NAD_+__ LigA [Wolbachia endosymbiont of Onchocerca volvulus]	gi|58584805|ref|YP_198378.1| NAD-dependent DNA ligase_ Lig [Wolbachia endosymbiont strain TRS of Brugia malayi]	BAO99831.1 DNA ligase NAD-dependent [Wolbachia endosymbiont of Cimex lectularius]	CDR79153.1 DNA ligase_ NAD-dependent_DNA ligase_NAD-dependent DNA ligase LigA_3-methyladenine DNA glycosylase_DNA ligase_ NAD-dependent_NAD-dependent DNA ligase adenylation domain [Wolbachia]	AAS14465.1 DNA ligase_ NAD-dependent [Wolbachia endosymbiont of Drosophila melanogaster]	AGJ99748.1 DNA ligase [Wolbachia endosymbiont of Drosophila simulans wHa], AGK00102.1 DNA ligase [Wolbachia endosymbiont of Drosophila simulans wHa]	ACN95391.1 DNA ligase [Wolbachia sp. wRi]	AGJ99409.1 DNA ligase [Wolbachia endosymbiont of Drosophila simulans wNo]	CAQ54574.1 DNA ligase_ NAD-dependent [Wolbachia endosymbiont of Culex quinquefasciatus Pel]	WP_010962827.1 MULTISPECIES_ DNA ligase _NAD_+__ LigA [Wolbachia]	WP_007301909.1 MULTISPECIES_ DNA ligase _NAD_+__ LigA [Wolbachia]	WP_047758772.1 DNA ligase [Wolbachia endosymbiont of Armadillidium vulgare]	wFol_00300 ligA DNA ligase _NAD_+__ LigA 38590_40794 forward MW_81796, wFol_03160 ligA NAD-dependent DNA ligase LigA 376690_378741 reverse MW_76628, wFol_05380 ligA DNA ligase 652521_654467 reverse MW_72986, wFol_09870 ligA DNA ligase 1165355_1167310 forward MW_73087, wFol_10080 ligA DNA ligase 1194859_1196790 reverse MW_72247	OCA05794.1 DNA ligase_ NAD-dependent [Wolbachia endosymbiont of Trichogramma pretiosum]		ONI56299.1 DNA ligase_ NAD-dependent [Wolbachia pipientis wUni]	OEY87149.1 DNA ligase _NAD_+__ LigA [Wolbachia pipientis]		OG0000065	1	1	1	1	1	1	2	1	1	1	1	1	1	5	1	0	1	1		1.22222	1.00326		OG0000065	-0.2215	-0.2215	-0.2215	-0.2215	-0.2215	-0.2215
OG0000066			gi|58584625|ref|YP_198198.1| hypothetical protein Wbm0368 [Wolbachia endosymbiont strain TRS of Brugia malayi]		CDR79165.1 putative RDD domain transmembrane protein_RDD family [Wolbachia], CDR79166.1 putative RDD domain transmembrane protein_RDD family [Wolbachia]	AAS14480.1 hypothetical protein WD_0792 [Wolbachia endosymbiont of Drosophila melanogaster], AAS14481.1 hypothetical protein WD_0793 [Wolbachia endosymbiont of Drosophila melanogaster]	AGK00113.1 RDD family protein [Wolbachia endosymbiont of Drosophila simulans wHa], AGK00114.1 RDD family protein [Wolbachia endosymbiont of Drosophila simulans wHa]	ACN95403.1 hypothetical protein WRi_006340 [Wolbachia sp. wRi], ACN95404.1 hypothetical protein WRi_006350 [Wolbachia sp. wRi]	AGJ98687.1 RDD family protein_ putative [Wolbachia endosymbiont of Drosophila simulans wNo]	CAQ54517.1 putative RDD domain transmembrane protein [Wolbachia endosymbiont of Culex quinquefasciatus Pel]	WP_038199117.1 hypothetical protein [Wolbachia pipientis], WP_038199119.1 RDD family protein [Wolbachia pipientis]	WP_019236640.1 hypothetical protein [Wolbachia pipientis]	WP_047759002.1 hypothetical protein [Wolbachia endosymbiont of Armadillidium vulgare]	wFol_05020 wFol_05020 RDD family protein 614357_614872 forward MW_20042, wFol_08800 wFol_08800 RDD family protein 1050182_1050745 reverse MW_20695, wFol_12610 wFol_12610 RDD family protein 1488968_1489468 forward MW_18724	OCA07025.1 RDD family protein [Wolbachia endosymbiont of Trichogramma pretiosum]		ONI56276.1 RDD family protein [Wolbachia pipientis wUni], ONI56277.1 RDD family protein [Wolbachia pipientis wUni], ONI56740.1 RDD family protein [Wolbachia pipientis wUni]			OG0000066	0	0	1	0	2	2	2	2	1	1	2	1	1	3	1	0	3	0		1.22222	1.00326		OG0000066	-1.21825	-1.21825	-0.2215	-1.21825	0.775248	0.775248
OG0000067			gi|58584326|ref|YP_197899.1| hypothetical protein Wbm0065 [Wolbachia endosymbiont strain TRS of Brugia malayi], gi|58584897|ref|YP_198470.1| hypothetical protein Wbm0640 [Wolbachia endosymbiont strain TRS of Brugia malayi]	BAO99635.1 putative uncharacterized protein [Wolbachia endosymbiont of Cimex lectularius], BAP00165.1 putative uncharacterized protein [Wolbachia endosymbiont of Cimex lectularius]	CDR79184.1 hypothetical protein WPAU_0811 [Wolbachia]	AAS14505.1 hypothetical protein WD_0818 [Wolbachia endosymbiont of Drosophila melanogaster]	AGK00131.1 hypothetical protein wHa_06900 [Wolbachia endosymbiont of Drosophila simulans wHa]	ACN95531.1 hypothetical protein WRi_007840 [Wolbachia sp. wRi]	AGJ99321.1 hypothetical protein wNo_09420 [Wolbachia endosymbiont of Drosophila simulans wNo]	CAQ54239.1 hypothetical protein WP0131 [Wolbachia endosymbiont of Culex quinquefasciatus Pel], CAQ55158.1 Hypothetical protein WP1050 [Wolbachia endosymbiont of Culex quinquefasciatus Pel]	WP_022626354.1 MULTISPECIES_ hypothetical protein [Wolbachia]	WP_019078583.1 MULTISPECIES_ hypothetical protein [Wolbachia], WP_019078607.1 MULTISPECIES_ hypothetical protein [Wolbachia]	WP_047759316.1 hypothetical protein [Wolbachia endosymbiont of Armadillidium vulgare], WP_047759412.1 hypothetical protein [Wolbachia endosymbiont of Armadillidium vulgare]	wFol_00350 wFol_00350 Unique protein 44610_47969 forward MW_124728, wFol_05050 wFol_05050 Uncharacterized protein 619288_620073 reverse MW_30082	OCA06084.1 hypothetical protein wTpre_406 [Wolbachia endosymbiont of Trichogramma pretiosum], OCA06652.1 hypothetical protein wTpre_992 [Wolbachia endosymbiont of Trichogramma pretiosum], OCA06653.1 hypothetical protein wTpre_993 [Wolbachia endosymbiont of Trichogramma pretiosum]		ONI56194.1 hypothetical protein N500_0733 [Wolbachia pipientis wUni]			OG0000067	0	0	2	2	1	1	1	1	1	2	1	2	2	2	3	0	1	0		1.22222	0.878204		OG0000067	-1.39173	-1.39173	0.885646	0.885646	-0.253042	-0.253042
OG0000068					CDR79376.1 hypothetical protein WPAU_1012 [Wolbachia], CDR79581.1 hypothetical protein WPAU_1228 [Wolbachia]	AAS14610.1 hypothetical protein WD_0942 [Wolbachia endosymbiont of Drosophila melanogaster], AAS14874.1 hypothetical protein WD_1228 [Wolbachia endosymbiont of Drosophila melanogaster]	AGK00216.1 hypothetical protein wHa_07880 [Wolbachia endosymbiont of Drosophila simulans wHa]		AGJ98623.1 hypothetical protein wNo_01860 [Wolbachia endosymbiont of Drosophila simulans wNo]	CAQ54260.1 hypothetical protein WP0152 [Wolbachia endosymbiont of Culex quinquefasciatus Pel], CAQ54629.1 hypothetical protein WP0521 [Wolbachia endosymbiont of Culex quinquefasciatus Pel]	WP_038199237.1 hypothetical protein [Wolbachia pipientis], WP_038199594.1 hypothetical protein [Wolbachia pipientis]	WP_007301958.1 MULTISPECIES_ hypothetical protein [Wolbachia], WP_007302701.1 MULTISPECIES_ hypothetical protein [Wolbachia]	WP_047759027.1 hypothetical protein [Wolbachia endosymbiont of Armadillidium vulgare]	wFol_08760 wFol_08760 Unique protein 1046298_1047227 reverse MW_34713	OCA05713.1 hypothetical protein wTpre_32 [Wolbachia endosymbiont of Trichogramma pretiosum], OCA05714.1 hypothetical protein wTpre_33 [Wolbachia endosymbiont of Trichogramma pretiosum], OCA06058.1 hypothetical protein wTpre_380 [Wolbachia endosymbiont of Trichogramma pretiosum], OCA06059.1 hypothetical protein wTpre_381 [Wolbachia endosymbiont of Trichogramma pretiosum], OCA06060.1 hypothetical p…	wLcla00130 wLcla00130 Uncharacterized protein 8204_9571 reverse MW_50542	ONI55847.1 hypothetical protein N500_1079 [Wolbachia pipientis wUni], ONI56113.1 hypothetical protein N500_0832 [Wolbachia pipientis wUni]			OG0000068	0	0	0	0	2	2	1	0	1	2	2	2	1	1	5	1	2	0		1.22222	1.26284		OG0000068	-0.967834	-0.967834	-0.967834	-0.967834	0.615895	0.615895
OG0000069	wOo_04420 wOo_04420 major facilitator superfamily permease 378773_379993 forward MW_45160	WP_029784302.1 permease [Wolbachia endosymbiont of Onchocerca volvulus]	gi|58584265|ref|YP_197838.1| Permease of the major facilitator superfamily [Wolbachia endosymbiont strain TRS of Brugia malayi]	BAO99939.1 major facilitator superfamily protein [Wolbachia endosymbiont of Cimex lectularius]	CDR79458.1 Major facilitator superfamily protein_Arabinose efflux permease_D-galactonate transporter_Major Facilitator Superfamily [Wolbachia], CDR79459.1 permease_multidrug efflux system protein MdtL_Arabinose efflux permease_phosphoglycerate transporter family protein_Major Facilitator Superfamily [Wolbachia]	AAS14691.1 permease_ putative [Wolbachia endosymbiont of Drosophila melanogaster], AAS14692.1 membrane protein_ putative [Wolbachia endosymbiont of Drosophila melanogaster]	AGK00286.1 Permease_ putative [Wolbachia endosymbiont of Drosophila simulans wHa]	ACN95768.1 hypothetical protein WRi_010640 [Wolbachia sp. wRi], ACN95771.1 permease_ putative [Wolbachia sp. wRi]	AGJ98918.1 Permease_ putative [Wolbachia endosymbiont of Drosophila simulans wNo]	CAQ54945.1 Major facilitator superfamily protein [Wolbachia endosymbiont of Culex quinquefasciatus Pel]	WP_010081954.1 hypothetical protein [Wolbachia pipientis], WP_038199305.1 MULTISPECIES_ permease [Wolbachia]	WP_019236796.1 permease [Wolbachia pipientis]	WP_047759831.1 permease [Wolbachia endosymbiont of Armadillidium vulgare]	wFol_12210 wFol_12210 Major facilitator superfamily protein 1437869_1439104 reverse MW_45377	OCA06629.1 major Facilitator Superfamily protein [Wolbachia endosymbiont of Trichogramma pretiosum]	wLcla07270 wLcla07270 Major facilitator superfamily protein 670869_672104 reverse MW_45512	ONI56017.1 major Facilitator Superfamily protein [Wolbachia pipientis wUni]	OEY86428.1 permease [Wolbachia pipientis]		OG0000069	1	1	1	1	2	2	1	2	1	1	2	1	1	1	1	1	1	1		1.22222	0.427793		OG0000069	-0.519462	-0.519462	-0.519462	-0.519462	1.81812	1.81812
OG0000070		WP_025264248.1 exopolysaccharide biosynthesis protein ExoD [Wolbachia endosymbiont of Onchocerca volvulus]	gi|58584936|ref|YP_198509.1| Uncharacterized ABC-type transport system_ permease component [Wolbachia endosymbiont strain TRS of Brugia malayi]	BAO99858.1 exopolysaccharide synthesis protein [Wolbachia endosymbiont of Cimex lectularius]	CDR78483.1 exopolysaccharide synthesis protein ExoD-related protein_Exopolysaccharide synthesis_ ExoD [Wolbachia], CDR78484.1 exopolysaccharide synthesis protein ExoD-like_Exopolysaccharide synthesis_ ExoD [Wolbachia]	AAS13902.1 exopolysaccharide synthesis protein ExoD-related protein [Wolbachia endosymbiont of Drosophila melanogaster], AAS13903.1 exopolysaccharide synthesis protein ExoD-related protein [Wolbachia endosymbiont of Drosophila melanogaster]	AGJ99562.1 Exopolysaccharide synthesis protein ExoD-related protein [Wolbachia endosymbiont of Drosophila simulans wHa], AGJ99563.1 Exopolysaccharide synthesis protein ExoD-related protein [Wolbachia endosymbiont of Drosophila simulans wHa]	ACN94956.1 exopolysaccharide synthesis protein ExoD-related protein [Wolbachia sp. wRi], ACN94957.1 exopolysaccharide synthesis protein ExoD-related protein [Wolbachia sp. wRi]	AGJ98507.1 Exopolysaccharide synthesis ExoD-like protein [Wolbachia endosymbiont of Drosophila simulans wNo]	CAQ54184.1 exopolysaccharide synthesis protein ExoD-like [Wolbachia endosymbiont of Culex quinquefasciatus Pel], CAQ54185.1 exopolysaccharide synthesis protein ExoD-like [Wolbachia endosymbiont of Culex quinquefasciatus Pel]			WP_047758945.1 exopolysaccharide biosynthesis protein exod [Wolbachia endosymbiont of Armadillidium vulgare]	wFol_07680 wFol_07680 Exopolysaccharide synthesis protein ExoD-related protein 911349_911996 reverse MW_23579	OCA05951.1 exopolysaccharide synthesis_ ExoD family protein [Wolbachia endosymbiont of Trichogramma pretiosum], OCA05952.1 exopolysaccharide synthesis_ ExoD family protein [Wolbachia endosymbiont of Trichogramma pretiosum]	wLcla02430 wLcla02430 Exopolysaccharide synthesis ExoD-like protein 217054_217710 reverse MW_24090	ONI56781.1 exopolysaccharide synthesis_ ExoD family protein_ partial [Wolbachia pipientis wUni]	OEY86472.1 exopolysaccharide biosynthesis protein exod [Wolbachia pipientis]		OG0000070	0	1	1	1	2	2	2	2	1	2	0	0	1	1	2	1	1	1		1.16667	0.707107		OG0000070	-1.64992	-0.235702	-0.235702	-0.235702	1.17851	1.17851
OG0000071					CDR78696.1 Putative phage related protein [Wolbachia], CDR79029.1 putative phage related protein [Wolbachia]	AAS14012.1 conserved hypothetical protein_ degenerate [Wolbachia endosymbiont of Drosophila melanogaster], AAS14307.1 hypothetical protein WD_0605 [Wolbachia endosymbiont of Drosophila melanogaster]		ACN95330.1 hypothetical protein WRi_005530 [Wolbachia sp. wRi], ACN95468.1 hypothetical protein WRi_007140 [Wolbachia sp. wRi], ACN95724.1 hypothetical protein WRi_010190 [Wolbachia sp. wRi], ACN95937.1 hypothetical protein WRi_012590 [Wolbachia sp. wRi]	AGJ99125.1 hypothetical protein wNo_07270 [Wolbachia endosymbiont of Drosophila simulans wNo]	CAQ54357.1 Putative phage related protein [Wolbachia endosymbiont of Culex quinquefasciatus Pel], CAQ54437.1 Putative phage related protein [Wolbachia endosymbiont of Culex quinquefasciatus Pel], CAQ54530.1 putative phage related protein [Wolbachia endosymbiont of Culex quinquefasciatus Pel], CAQ55408.1 Putative phage related protein [Wolbachia endosymbiont of Culex quinquefasciatus Pel]	WP_038199782.1 hypothetical protein_ partial [Wolbachia pipientis]	WP_019236397.1 hypothetical protein [Wolbachia pipientis], WP_019236419.1 hypothetical protein [Wolbachia pipientis], WP_019237012.1 hypothetical protein [Wolbachia pipientis]	WP_019236419.1 hypothetical protein [Wolbachia pipientis], WP_047759249.1 hypothetical protein [Wolbachia endosymbiont of Armadillidium vulgare], WP_047759657.1 hypothetical protein [Wolbachia endosymbiont of Armadillidium vulgare]	wFol_05840 wFol_05840 Putative phage related protein 693410_693721 forward MW_11761						OG0000071	0	0	0	0	2	2	0	4	1	4	1	3	3	1	0	0	0	0		1.16667	1.46528		OG0000071	-0.796205	-0.796205	-0.796205	-0.796205	0.568718	0.568718
OG0000072			gi|58584366|ref|YP_197939.1| hypothetical protein Wbm0105 [Wolbachia endosymbiont strain TRS of Brugia malayi]		CDR78810.1 hypothetical protein WPAU_0420 [Wolbachia], CDR78811.1 hypothetical protein WPAU_0421 [Wolbachia]	AAS14109.1 hypothetical protein WD_0383 [Wolbachia endosymbiont of Drosophila melanogaster]	AGJ99924.1 hypothetical protein wHa_04670 [Wolbachia endosymbiont of Drosophila simulans wHa]		AGJ99461.1 hypothetical protein wNo_10960 [Wolbachia endosymbiont of Drosophila simulans wNo], AGJ99463.1 hypothetical protein wNo_10980 [Wolbachia endosymbiont of Drosophila simulans wNo], AGJ99464.1 hypothetical protein wNo_10990 [Wolbachia endosymbiont of Drosophila simulans wNo]	CAQ55392.1 hypothetical protein WP1284 [Wolbachia endosymbiont of Culex quinquefasciatus Pel], CAQ55395.1 hypothetical protein WP1287 [Wolbachia endosymbiont of Culex quinquefasciatus Pel], CAQ55396.1 hypothetical protein WP1288 [Wolbachia endosymbiont of Culex quinquefasciatus Pel]	WP_038198695.1 hypothetical protein [Wolbachia pipientis]	WP_019236966.1 hypothetical protein [Wolbachia pipientis]	WP_047758671.1 hypothetical protein [Wolbachia endosymbiont of Armadillidium vulgare], WP_047758680.1 hypothetical protein [Wolbachia endosymbiont of Armadillidium vulgare]		OCA06208.1 hypothetical protein wTpre_533 [Wolbachia endosymbiont of Trichogramma pretiosum], OCA06209.1 hypothetical protein wTpre_534 [Wolbachia endosymbiont of Trichogramma pretiosum], OCA06210.1 hypothetical protein wTpre_535 [Wolbachia endosymbiont of Trichogramma pretiosum], OCA06213.1 hypothetical protein wTpre_538 [Wolbachia endosymbiont of Trichogramma pretiosum]		ONI56461.1 hypothetical protein N500_0461 [Wolbachia pipientis wUni]	OEY86843.1 hypothetical protein BIY23_04665 [Wolbachia pipientis]		OG0000072	0	0	1	0	2	1	1	0	3	3	1	1	2	0	4	0	1	1		1.16667	1.20049		OG0000072	-0.971825	-0.971825	-0.138832	-0.971825	0.694161	-0.138832
OG0000073					CDR79032.1 transposase_Transposase IS116/IS110/IS902 family [Wolbachia]		AGJ99723.1 Putative transposase [Wolbachia endosymbiont of Drosophila simulans wHa]		AGJ98525.1 Transposase [Wolbachia endosymbiont of Drosophila simulans wNo], AGJ98576.1 Transposase [Wolbachia endosymbiont of Drosophila simulans wNo], AGJ98837.1 Transposase [Wolbachia endosymbiont of Drosophila simulans wNo], AGJ98969.1 Transposase [Wolbachia endosymbiont of Drosophila simulans wNo], AGJ99022.1 Transposase [Wolbachia endosymbiont of Drosophila simulans wNo], AGJ99073.1 Transpos…					wFol_03090 wFol_03090 Transposase_ IS110 family 369085_369939 forward MW_32794, wFol_03410 wFol_03410 Transposase_ IS110 family 398606_399460 reverse MW_32794, wFol_03640 wFol_03640 Transposase_ IS110 family 422342_423196 forward MW_32794, wFol_05310 wFol_05310 Transposase_ IS110 family 644907_645761 forward MW_32794, wFol_06340 wFol_06340 Transposase_ IS110 family 756671_757525 forward MW_32794,…						OG0000073	0	0	0	0	1	0	1	0	11	0	0	0	0	8	0	0	0	0		1.16667	3.09173		OG0000073	-0.37735	-0.37735	-0.37735	-0.37735	-0.0539072	-0.37735
OG0000074	wOo_06360 wOo_06360 hypothetical protein 568416_569798 reverse MW_52374	WP_025264014.1 hypothetical protein [Wolbachia endosymbiont of Onchocerca volvulus]	gi|58585029|ref|YP_198602.1| hypothetical protein Wbm0772 [Wolbachia endosymbiont strain TRS of Brugia malayi]	BAP00529.1 putative uncharacterized protein [Wolbachia endosymbiont of Cimex lectularius]	CDR79201.1 hypothetical protein WPAU_0829 [Wolbachia]	AAS14521.1 hypothetical protein WD_0835 [Wolbachia endosymbiont of Drosophila melanogaster]	AGK00148.1 hypothetical protein wHa_07090 [Wolbachia endosymbiont of Drosophila simulans wHa], AGK00149.1 hypothetical protein wHa_07100 [Wolbachia endosymbiont of Drosophila simulans wHa]	ACN95546.1 hypothetical protein WRi_008020 [Wolbachia sp. wRi]	AGJ99088.1 hypothetical protein wNo_06820 [Wolbachia endosymbiont of Drosophila simulans wNo]	CAQ55094.1 hypothetical protein WP0986 [Wolbachia endosymbiont of Culex quinquefasciatus Pel]	WP_051955841.1 hypothetical protein [Wolbachia pipientis]	WP_019236821.1 hypothetical protein [Wolbachia pipientis]	WP_047759458.1 hypothetical protein [Wolbachia endosymbiont of Armadillidium vulgare]	wFol_12470 wFol_12470 Putative membrane protein 1470332_1471657 reverse MW_50067	OCA06546.1 hypothetical protein wTpre_884 [Wolbachia endosymbiont of Trichogramma pretiosum]	wLcla08880 wLcla08880 Uncharacterized protein 807327_808544 reverse MW_46295	ONI56178.1 hypothetical protein N500_0751_ partial [Wolbachia pipientis wUni]	OEY86806.1 hypothetical protein BIY23_02130 [Wolbachia pipientis], OEY86810.1 hypothetical protein BIY23_02150 [Wolbachia pipientis], OEY86841.1 hypothetical protein BIY23_04655 [Wolbachia pipientis]		OG0000074	1	1	1	1	1	1	2	1	1	1	1	1	1	1	1	1	1	3		1.16667	0.514496		OG0000074	-0.323942	-0.323942	-0.323942	-0.323942	-0.323942	-0.323942
OG0000075	wOo_01640 wOo_01640 DNA-directed RNA polymerase fusion of beta and be ta' subunits RpoBRpoC 143097_151619 forward MW_318945	WP_044104118.1 DNA-directed RNA polymerase subunit beta' [Wolbachia endosymbiont of Onchocerca volvulus]	gi|58584904|ref|YP_198477.1| DNA-directed RNA polymerase_ fusion of beta and beta' subunits. RpoB/RpoC [Wolbachia endosymbiont strain TRS of Brugia malayi]	BAP00212.1 DNA-directed RNA polymerase fusion of beta and beta' subunits RpoB/RpoC [Wolbachia endosymbiont of Cimex lectularius]	CDR78422.1 DNA-directed RNA polymerase subunit beta/beta'_Bifunctional DNA-directed RNA polymerase subunit beta-beta'_bifunctional DNA-directed RNA polymerase subunit beta/beta'_DNA-directed RNA polymerase_ beta' subunit/160 kD subunit_DNA-directed RNA polymerase_ beta subunit_RNA polymerase Rpb2_ domain 6 [Wolbachia]	AAS13791.1 DNA-directed RNA polymerase_ beta/beta' subunits [Wolbachia endosymbiont of Drosophila melanogaster]	AGJ99521.1 Bifunctional DNA-directed RNA polymerase subunit beta-beta' [Wolbachia endosymbiont of Drosophila simulans wHa]	ACN94893.1 DNA-directed RNA polymerase_ beta subunit [Wolbachia sp. wRi]	AGJ98692.1 Bifunctional DNA-directed RNA polymerase subunit beta-beta' [Wolbachia endosymbiont of Drosophila simulans wNo]	CAQ54662.1 DNA-directed RNA polymerase_ beta/beta' subunits [Wolbachia endosymbiont of Culex quinquefasciatus Pel]	WP_038198514.1 bifunctional DNA-directed RNA polymerase subunit beta/beta' [Wolbachia pipientis]	WP_038198055.1 DNA-directed RNA polymerase subunit beta' [Wolbachia pipientis]	WP_047759102.1 DNA-directed RNA polymerase subunit beta' [Wolbachia endosymbiont of Armadillidium vulgare], WP_047759103.1 hypothetical protein_ partial [Wolbachia endosymbiont of Armadillidium vulgare]	wFol_00540 rpoBC DNA-directed RNA polymerase subunit beta 66861_75386 forward MW_317515	OCA07020.1 DNA-directed RNA polymerase_ beta'' subunit [Wolbachia endosymbiont of Trichogramma pretiosum]	wLcla04980 rpoBC DNA-directed RNA polymerase subunit beta 440691_449210 reverse MW_318485	ONI56882.1 RNA polymerase beta subunit [Wolbachia pipientis wUni], ONI56883.1 DNA-directed RNA polymerase_ beta' subunit [Wolbachia pipientis wUni]	OEY86832.1 DNA-directed RNA polymerase subunit beta' [Wolbachia pipientis]		OG0000075	1	1	1	1	1	1	1	1	1	1	1	1	2	1	1	1	2	1		1.11111	0.323381		OG0000075	-0.343592	-0.343592	-0.343592	-0.343592	-0.343592	-0.343592
OG0000076					CDR78526.1 sugE protein_Quaternary ammonium compound-resistance protein sugE_multidrug efflux system protein_Membrane transporters of cations and cationic drugs_Small Multidrug Resistance protein [Wolbachia], CDR78527.1 multidrug resistance protein_Quaternary ammonium compound-resistance protein sugE_multidrug efflux system protein_Membrane transporters of cations and cationic drugs_Small Multidr…	AAS13856.1 multidrug resistance protein [Wolbachia endosymbiont of Drosophila melanogaster], AAS13857.1 sugE protein [Wolbachia endosymbiont of Drosophila melanogaster]	AGJ99616.1 Small multidrug resistance protein [Wolbachia endosymbiont of Drosophila simulans wHa], AGJ99617.1 Small multidrug resistance protein [Wolbachia endosymbiont of Drosophila simulans wHa]	ACN94997.1 sugE protein [Wolbachia sp. wRi], ACN94998.1 small multidrug resistance protein [Wolbachia sp. wRi]	AGJ98920.1 Small multidrug resistance protein [Wolbachia endosymbiont of Drosophila simulans wNo]	CAQ54948.1 sugE protein [Wolbachia endosymbiont of Culex quinquefasciatus Pel]	WP_038199454.1 multidrug transporter [Wolbachia pipientis], WP_038199459.1 QacE family quaternary ammonium compound efflux SMR transporter [Wolbachia pipientis]	WP_010403511.1 MULTISPECIES_ QacE family quaternary ammonium compound efflux SMR transporter [Wolbachia]	WP_047759618.1 multidrug transporter [Wolbachia endosymbiont of Armadillidium vulgare]	wFol_12710 sugE SugE protein 1500122_1500445 reverse MW_12020, wFol_12720 wFol_12720 Small multidrug resistance protein 1500460_1500774 reverse MW_11314	OCA06630.1 quaternary ammonium compound-resistance protein sugE [Wolbachia endosymbiont of Trichogramma pretiosum]	wLcla07300 sugE Small multidrug resistance protein 673020_673337 reverse MW_11311	ONI56735.1 sugE protein [Wolbachia pipientis wUni], ONI56736.1 quaternary ammonium compound-resistance protein sugE [Wolbachia pipientis wUni]			OG0000076	0	0	0	0	2	2	2	2	1	1	2	1	1	2	1	1	2	0		1.11111	0.832352		OG0000076	-1.3349	-1.3349	-1.3349	-1.3349	1.06792	1.06792
OG0000077	wOo_06570 wOo_06570 orotate phosphoribosyltransferase 590151_590747 reverse MW_22020	WP_025264029.1 orotate phosphoribosyltransferase [Wolbachia endosymbiont of Onchocerca volvulus]	gi|58585047|ref|YP_198620.1| Orotate phosphoribosyltransferase [Wolbachia endosymbiont strain TRS of Brugia malayi]	BAO99382.1 orotate phosphoribosyltransferase [Wolbachia endosymbiont of Cimex lectularius], BAP00271.1 hypothetical protein WCLE_009840 [Wolbachia endosymbiont of Cimex lectularius]	CDR78608.1 orotate phosphoribosyltransferase_Orotate phosphoribosyltransferase_orotate phosphoribosyltransferase_orotate phosphoribosyltransferase_Phosphoribosyl transferase domain [Wolbachia]	AAS13972.1 orotate phosphoribosyltransferase [Wolbachia endosymbiont of Drosophila melanogaster]	AGJ99663.1 Orotate phosphoribosyltransferase [Wolbachia endosymbiont of Drosophila simulans wHa]	ACN95048.1 orotate phosphoribosyltransferase [Wolbachia sp. wRi]	AGJ98582.1 Orotate phosphoribosyltransferase [Wolbachia endosymbiont of Drosophila simulans wNo]	CAQ54578.1 orotate phosphoribosyltransferase [Wolbachia endosymbiont of Culex quinquefasciatus Pel]	WP_038199753.1 orotate phosphoribosyltransferase [Wolbachia pipientis]	WP_007301912.1 MULTISPECIES_ orotate phosphoribosyltransferase [Wolbachia]	WP_047758774.1 orotate phosphoribosyltransferase [Wolbachia endosymbiont of Armadillidium vulgare]	wFol_12160 wFol_12160 Putative membrane protein 1431420_1433228 reverse MW_68395, wFol_14640 pyrE Orotate phosphoribosyltransferase 1744621_1745235 reverse MW_22608	OCA05791.1 orotate phosphoribosyltransferase [Wolbachia endosymbiont of Trichogramma pretiosum]	wLcla00630 pyrE Orotate phosphoribosyltransferase 49384_49974 reverse MW_21806	ONI56654.1 orotate phosphoribosyltransferase [Wolbachia pipientis wUni]	OEY86600.1 orotate phosphoribosyltransferase [Wolbachia pipientis]		OG0000077	1	1	1	2	1	1	1	1	1	1	1	1	1	2	1	1	1	1		1.11111	0.323381		OG0000077	-0.343592	-0.343592	-0.343592	2.74874	-0.343592	-0.343592
OG0000078				BAO99996.1 putative uncharacterized protein [Wolbachia endosymbiont of Cimex lectularius]	CDR78657.1 hypothetical protein WPAU_0265 [Wolbachia]		AGJ99850.1 hypothetical protein wHa_03830 [Wolbachia endosymbiont of Drosophila simulans wHa]	ACN95445.1 hypothetical protein WRi_006890 [Wolbachia sp. wRi]	AGJ99399.1 hypothetical protein wNo_10270 [Wolbachia endosymbiont of Drosophila simulans wNo]	CAQ54378.1 hypothetical protein WP0270 [Wolbachia endosymbiont of Culex quinquefasciatus Pel], CAQ54561.1 hypothetical protein WP0453 [Wolbachia endosymbiont of Culex quinquefasciatus Pel], CAQ55445.1 hypothetical protein WP1338 [Wolbachia endosymbiont of Culex quinquefasciatus Pel]		WP_019236453.1 hypothetical protein [Wolbachia pipientis], WP_019236477.1 hypothetical protein [Wolbachia pipientis], WP_019236585.1 hypothetical protein [Wolbachia pipientis]	WP_047759112.1 hypothetical protein [Wolbachia endosymbiont of Armadillidium vulgare], WP_047759676.1 hypothetical protein [Wolbachia endosymbiont of Armadillidium vulgare]	wFol_03220 wFol_03220 Putative membrane protein 382904_383143 reverse MW_9235, wFol_05430 wFol_05430 Putative membrane protein 657526_657765 reverse MW_9291, wFol_08960 wFol_08960 Putative membrane protein 1066118_1066342 reverse MW_8726, wFol_09810 wFol_09810 Putative membrane protein 1161003_1161233 forward MW_8952, wFol_10120 wFol_10120 Putative membrane protein 1199364_1199582 reverse MW_8678	OCA07049.1 hypothetical protein wTpre_1405 [Wolbachia endosymbiont of Trichogramma pretiosum]	wLcla10940 wLcla10940 Uncharacterized protein 1014301_1014510 reverse MW_8181				OG0000078	0	0	0	1	1	0	1	1	1	3	0	3	2	5	1	1	0	0		1.11111	1.36722		OG0000078	-0.812681	-0.812681	-0.812681	-0.0812681	-0.0812681	-0.812681
OG0000079					CDR78681.1 putative phage related protein_RNA polymerase sigma factor_RNA polymerase sigma factor_ sigma-70 family [Wolbachia]	AAS14296.1 conserved hypothetical protein [Wolbachia endosymbiont of Drosophila melanogaster]	AGJ99829.1 RNA polymerase sigma-70 domain protein [Wolbachia endosymbiont of Drosophila simulans wHa]	ACN95511.1 hypothetical protein WRi_007620 [Wolbachia sp. wRi]	AGJ98574.1 Sigma-70 region 2 domain protein [Wolbachia endosymbiont of Drosophila simulans wNo]	CAQ54372.1 RNA polymerase sigma-70 domain protein [Wolbachia endosymbiont of Culex quinquefasciatus Pel], CAQ54429.1 RNA polymerase sigma-70 domain protein [Wolbachia endosymbiont of Culex quinquefasciatus Pel], CAQ54542.1 RNA polymerase sigma-70 domain protein [Wolbachia endosymbiont of Culex quinquefasciatus Pel], CAQ55422.1 putative phage related protein [Wolbachia endosymbiont of Culex quinqu…		WP_017532588.1 MULTISPECIES_ hypothetical protein [Wolbachia], WP_019236463.1 hypothetical protein [Wolbachia pipientis]	WP_047759129.1 hypothetical protein [Wolbachia endosymbiont of Armadillidium vulgare], WP_047759163.1 RNA polymerase sigma70 [Wolbachia endosymbiont of Armadillidium vulgare], WP_047759376.1 RNA polymerase sigma-70 factor [Wolbachia endosymbiont of Armadillidium vulgare]	wFol_05660 wFol_05660 Sigma-70 domain protein 677347_677838 reverse MW_19104, wFol_05980 wFol_05980 Putative phage related protein 703898_704443 reverse MW_21033, wFol_09560 wFol_09560 Putative RNA polymerase ECF-type sigma factor 1138702_1139217 forward MW_19997, wFol_10330 wFol_10330 RNA polymerase sigma-70 domain protein 1232401_1232925 forward MW_19882	OCA07043.1 hypothetical protein wTpre_1399 [Wolbachia endosymbiont of Trichogramma pretiosum]		ONI56237.1 RNA polymerase sigma factor_ sigma-70 family protein [Wolbachia pipientis wUni]			OG0000079	0	0	0	0	1	1	1	1	1	4	0	2	3	4	1	0	1	0		1.11111	1.32349		OG0000079	-0.839529	-0.839529	-0.839529	-0.839529	-0.0839529	-0.0839529
OG0000080			gi|58585041|ref|YP_198614.1| hypothetical protein Wbm0784 [Wolbachia endosymbiont strain TRS of Brugia malayi]	BAP00369.1 putative uncharacterized protein [Wolbachia endosymbiont of Cimex lectularius]	CDR78882.1 hypothetical protein WPAU_0494 [Wolbachia], CDR78883.1 ATPase AAA_Uncharacterized protein conserved in bacteria with the myosin-like domain_chromosome segregation protein SMC [Wolbachia]	AAS14182.1 hypothetical protein WD_0462 [Wolbachia endosymbiont of Drosophila melanogaster]	AGJ99789.1 hypothetical protein wHa_03180 [Wolbachia endosymbiont of Drosophila simulans wHa]	ACN95099.1 hypothetical protein WRi_002780 [Wolbachia sp. wRi], ACN95100.1 hypothetical protein WRi_002790 [Wolbachia sp. wRi]	AGJ98487.1 hypothetical protein wNo_00260 [Wolbachia endosymbiont of Drosophila simulans wNo]	CAQ54208.1 hypothetical protein WP0100 [Wolbachia endosymbiont of Culex quinquefasciatus Pel]	WP_010962610.1 MULTISPECIES_ hypothetical protein [Wolbachia], WP_038198790.1 hypothetical protein [Wolbachia pipientis]	WP_019236319.1 hypothetical protein [Wolbachia pipientis]	WP_047758740.1 hypothetical protein [Wolbachia endosymbiont of Armadillidium vulgare]		OCA05911.1 hypothetical protein wTpre_229 [Wolbachia endosymbiont of Trichogramma pretiosum], OCA05912.1 hypothetical protein wTpre_230 [Wolbachia endosymbiont of Trichogramma pretiosum]		ONI56585.1 ATPase_ AAA family domain protein [Wolbachia pipientis wUni], ONI56588.1 ATPase_ AAA family_ partial [Wolbachia pipientis wUni], ONI56592.1 hypothetical protein N500_0325_ partial [Wolbachia pipientis wUni]	OEY86479.1 hypothetical protein BIY23_03545 [Wolbachia pipientis]		OG0000080	0	0	1	1	2	1	1	2	1	1	2	1	1	0	2	0	3	1		1.11111	0.832352		OG0000080	-1.3349	-1.3349	-0.13349	-0.13349	1.06792	-0.13349
OG0000081			gi|58584926|ref|YP_198499.1| hypothetical protein Wbm0669 [Wolbachia endosymbiont strain TRS of Brugia malayi]		CDR79437.1 UDP-N-acetylmuramoylalanyl-D-glutamate--2_ 6-diaminopimelate ligase_Wolbachia palindromic element domain [Wolbachia]	AAS13987.1 hypothetical protein WD_0244 [Wolbachia endosymbiont of Drosophila melanogaster], AAS14531.1 hypothetical protein WD_0847 [Wolbachia endosymbiont of Drosophila melanogaster], AAS14559.1 hypothetical protein WD_0877 [Wolbachia endosymbiont of Drosophila melanogaster], AAS14716.1 hypothetical protein WD_1059 [Wolbachia endosymbiont of Drosophila melanogaster]		ACN95793.1 hypothetical protein WRi_010960 [Wolbachia sp. wRi]	AGJ99003.1 hypothetical protein wNo_05870 [Wolbachia endosymbiont of Drosophila simulans wNo], AGJ99333.1 hypothetical protein wNo_09550 [Wolbachia endosymbiont of Drosophila simulans wNo]	CAQ54314.1 Hypothetical protein WP0206 [Wolbachia endosymbiont of Culex quinquefasciatus Pel], CAQ55048.1 Hypothetical protein WP0940 [Wolbachia endosymbiont of Culex quinquefasciatus Pel]	WP_051955852.1 hypothetical protein [Wolbachia pipientis], WP_051955854.1 hypothetical protein [Wolbachia pipientis]	WP_012481758.1 MULTISPECIES_ hypothetical protein [Wolbachia], WP_026097256.1 hypothetical protein [Wolbachia pipientis]		wFol_14280 wFol_14280 Putative membrane protein 1699631_1700086 reverse MW_17671	OCA06182.1 wolbachia palindromic element domain protein [Wolbachia endosymbiont of Trichogramma pretiosum]	wLcla00340 addB ATP-dependent helicase/nuclease subunit B 26381_26698 forward MW_11557	ONI55956.1 wolbachia palindromic element domain protein [Wolbachia pipientis wUni], ONI56606.1 wolbachia palindromic element domain protein [Wolbachia pipientis wUni]			OG0000081	0	0	1	0	1	4	0	1	2	2	2	2	0	1	1	1	2	0		1.11111	1.07861		OG0000081	-1.03013	-1.03013	-0.103013	-1.03013	-0.103013	2.67835
OG0000082	wOo_06430 wOo_06430 DNA polymerase I 575311_577899 reverse MW_98332	WP_025264018.1 DNA polymerase I [Wolbachia endosymbiont of Onchocerca volvulus]	gi|58584982|ref|YP_198555.1| DNA polymerase I_ PolA [Wolbachia endosymbiont strain TRS of Brugia malayi]	BAO99558.1 DNA polymerase I [Wolbachia endosymbiont of Cimex lectularius]	CDR79492.1 DNA polymerase I_DNA polymerase I_ thermostable_DNA polymerase I_DNA polymerase I-3'-5' exonuclease and polymerase domains_DNA polymerase I_DNA polymerase family A [Wolbachia]	AAS14664.1 DNA polymerase I [Wolbachia endosymbiont of Drosophila melanogaster]	AGK00260.1 DNA polymerase I [Wolbachia endosymbiont of Drosophila simulans wHa]	ACN95667.1 DNA polymerase I [Wolbachia sp. wRi]	AGJ99180.1 DNA polymerase I [Wolbachia endosymbiont of Drosophila simulans wNo]	CAQ55209.1 DNA polymerase I [Wolbachia endosymbiont of Culex quinquefasciatus Pel]	WP_038199273.1 DNA polymerase I [Wolbachia pipientis]	WP_007302475.1 MULTISPECIES_ DNA polymerase I [Wolbachia]	WP_047759778.1 DNA polymerase I [Wolbachia endosymbiont of Armadillidium vulgare]	wFol_07440 polA DNA polymerase 885493_888048 forward MW_96601	OCA06356.1 DNA polymerase I [Wolbachia endosymbiont of Trichogramma pretiosum]	wLcla05430 polA DNA polymerase I 492611_495139 reverse MW_96081	ONI56034.1 5'-3' exonuclease_ C-terminal SAM fold family protein_ partial [Wolbachia pipientis wUni], ONI56043.1 DNA polymerase I_ thermostable domain protein [Wolbachia pipientis wUni], ONI56044.1 DNA polymerase I domain protein_ partial [Wolbachia pipientis wUni]	OEY86619.1 DNA polymerase I [Wolbachia pipientis]		OG0000082	1	1	1	1	1	1	1	1	1	1	1	1	1	1	1	1	3	1		1.11111	0.471405		OG0000082	-0.235702	-0.235702	-0.235702	-0.235702	-0.235702	-0.235702
OG0000083	wOo_01530 wOo_01530 30S ribosomal protein S12 135714_136088 forward MW_13882	WP_014868765.1 MULTISPECIES_ 30S ribosomal protein S12 [Wolbachia]	gi|58584604|ref|YP_198177.1| Ribosomal protein S12 [Wolbachia endosymbiont strain TRS of Brugia malayi]	BAO99513.1 ribosomal protein S12 [Wolbachia endosymbiont of Cimex lectularius]	CDR78413.1 30S ribosomal protein S12_30S ribosomal protein S12_30S ribosomal protein S12_Ribosomal protein S12_ribosomal protein S12_Ribosomal protein S12 [Wolbachia]	AAS13781.1 ribosomal protein S12 [Wolbachia endosymbiont of Drosophila melanogaster]	AGJ99511.1 30S ribosomal protein S12 [Wolbachia endosymbiont of Drosophila simulans wHa]	ACN94883.1 ribosomal protein S12 [Wolbachia sp. wRi]	AGJ98702.1 30S ribosomal protein S12 [Wolbachia endosymbiont of Drosophila simulans wNo]	CAQ54672.1 ribosomal protein S12 [Wolbachia endosymbiont of Culex quinquefasciatus Pel]	WP_038198500.1 30S ribosomal protein S12 [Wolbachia pipientis]	WP_010406837.1 MULTISPECIES_ 30S ribosomal protein S12 [Wolbachia]	WP_047759012.1 30S ribosomal protein S12 [Wolbachia endosymbiont of Armadillidium vulgare]	wFol_00450 rpsL 30S ribosomal protein S12 59466_59840 forward MW_13847	OCA07010.1 ribosomal protein S12 [Wolbachia endosymbiont of Trichogramma pretiosum]	wLcla11360 rpsL 30S ribosomal protein S12 1049409_1049783 forward MW_13688	ONI55824.1 ribosomal protein S12 [Wolbachia pipientis wUni], ONI56904.1 ribosomal protein S12 [Wolbachia pipientis wUni]	OEY86792.1 30S ribosomal protein S12 [Wolbachia pipientis]		OG0000083	1	1	1	1	1	1	1	1	1	1	1	1	1	1	1	1	2	1		1.05556	0.235702		OG0000083	-0.235702	-0.235702	-0.235702	-0.235702	-0.235702	-0.235702
OG0000084	wOo_01540 wOo_01540 30S ribosomal protein S7 136094_136573 forward MW_17948	WP_014868766.1 MULTISPECIES_ 30S ribosomal protein S7 [Wolbachia]	gi|58584603|ref|YP_198176.1| Ribosomal protein S7 [Wolbachia endosymbiont strain TRS of Brugia malayi]	BAO99514.1 ribosomal protein S7 [Wolbachia endosymbiont of Cimex lectularius]	CDR78414.1 30S ribosomal protein S7_RRP-S7_30S ribosomal protein S7_Ribosomal protein S7_ribosomal protein S7_Ribosomal protein S7p/S5e [Wolbachia]	AAS13782.1 ribosomal protein S7 [Wolbachia endosymbiont of Drosophila melanogaster]	AGJ99512.1 30S ribosomal protein S7 [Wolbachia endosymbiont of Drosophila simulans wHa]	ACN94884.1 ribosomal protein S7 [Wolbachia sp. wRi]	AGJ98701.1 30S ribosomal protein S7 [Wolbachia endosymbiont of Drosophila simulans wNo]	CAQ54671.1 ribosomal protein S7 [Wolbachia endosymbiont of Culex quinquefasciatus Pel]	WP_007549313.1 MULTISPECIES_ 30S ribosomal protein S7 [Wolbachia]	WP_006014699.1 MULTISPECIES_ 30S ribosomal protein S7 [Wolbachia]	WP_047759011.1 30S ribosomal protein S7 [Wolbachia endosymbiont of Armadillidium vulgare]	wFol_00460 rpsG 30S ribosomal protein S7 59847_60326 forward MW_17786	OCA07011.1 ribosomal protein S7 [Wolbachia endosymbiont of Trichogramma pretiosum]	wLcla11370 rpsG 30S ribosomal protein S7 1049789_1050265 forward MW_17685	ONI55823.1 ribosomal protein S7 [Wolbachia pipientis wUni], ONI56905.1 ribosomal protein S7 [Wolbachia pipientis wUni]	OEY86793.1 30S ribosomal protein S7 [Wolbachia pipientis]		OG0000084	1	1	1	1	1	1	1	1	1	1	1	1	1	1	1	1	2	1		1.05556	0.235702		OG0000084	-0.235702	-0.235702	-0.235702	-0.235702	-0.235702	-0.235702
OG0000085	wOo_01550 wOo_01550 elongation factor G 136595_138661 forward MW_76370	WP_025264277.1 elongation factor G [Wolbachia endosymbiont of Onchocerca volvulus]	gi|58584602|ref|YP_198175.1| Translation elongation factor FusA_ GTPase [Wolbachia endosymbiont strain TRS of Brugia malayi]	BAO99515.1 translation elongation factor FusA GTPase [Wolbachia endosymbiont of Cimex lectularius]	CDR78415.1 elongation factor G_Vegetative protein 19_elongation factor G_GTPases-translation elongation factors_translation elongation factor G_Elongation factor Tu GTP binding domain [Wolbachia]	AAS13783.1 translation elongation factor G [Wolbachia endosymbiont of Drosophila melanogaster]	AGJ99513.1 Elongation factor G [Wolbachia endosymbiont of Drosophila simulans wHa]	ACN94885.1 translation elongation factor G [Wolbachia sp. wRi]	AGJ98700.1 Elongation factor G [Wolbachia endosymbiont of Drosophila simulans wNo]	CAQ54670.1 translation elongation factor G [Wolbachia endosymbiont of Culex quinquefasciatus Pel]	WP_038198502.1 elongation factor G [Wolbachia pipientis]	WP_010406835.1 MULTISPECIES_ elongation factor G [Wolbachia]	WP_047759010.1 elongation factor G [Wolbachia endosymbiont of Armadillidium vulgare]	wFol_00470 fusA Elongation factor G 60348_62423 forward MW_76296	OCA07012.1 translation elongation factor G [Wolbachia endosymbiont of Trichogramma pretiosum]	wLcla11380 fusA Elongation factor G 1050287_1052362 forward MW_76461	ONI55822.1 translation elongation factor G [Wolbachia pipientis wUni], ONI56906.1 translation elongation factor G_ partial [Wolbachia pipientis wUni]	OEY86794.1 translation elongation factor G [Wolbachia pipientis]		OG0000085	1	1	1	1	1	1	1	1	1	1	1	1	1	1	1	1	2	1		1.05556	0.235702		OG0000085	-0.235702	-0.235702	-0.235702	-0.235702	-0.235702	-0.235702
OG0000086	wOo_00420 wOo_00420 leucyl-tRNA synthetase 34132_36672 forward MW_97306	WP_025264237.1 leucine--tRNA ligase [Wolbachia endosymbiont of Onchocerca volvulus]	gi|58584862|ref|YP_198435.1| Leucyl-tRNA synthetase [Wolbachia endosymbiont strain TRS of Brugia malayi]	BAO99432.1 leucyl-tRNA synthetase [Wolbachia endosymbiont of Cimex lectularius]	CDR78450.1 leucyl-tRNA synthetase_Leucine--tRNA ligase_leucyl-tRNA synthetase_Leucyl-tRNA synthetase_leucine--tRNA ligase_tRNA synthetases class I _I_ L_ M and V_ [Wolbachia]	AAS13823.1 leucyl-tRNA synthetase [Wolbachia endosymbiont of Drosophila melanogaster]	AGJ99541.1 Leucyl-tRNA synthetase [Wolbachia endosymbiont of Drosophila simulans wHa]	ACN94915.1 leucyl-tRNA synthetase [Wolbachia sp. wRi]	AGJ98829.1 Leucyl-tRNA synthetase [Wolbachia endosymbiont of Drosophila simulans wNo]	CAQ54849.1 leucyl-tRNA synthetase [Wolbachia endosymbiont of Culex quinquefasciatus Pel]	WP_010962340.1 MULTISPECIES_ leucine--tRNA ligase [Wolbachia]	WP_026097242.1 leucine--tRNA ligase [Wolbachia pipientis]	WP_047759854.1 leucine--tRNA ligase [Wolbachia endosymbiont of Armadillidium vulgare]	wFol_11520 leuS Leucine--tRNA ligase 1368399_1371149 forward MW_104052	OCA06850.1 leucine--tRNA ligase [Wolbachia endosymbiont of Trichogramma pretiosum]	wLcla09900 leuS Leucine--tRNA ligase 901761_904220 forward MW_94310	ONI56814.1 tRNA synthetases class I family protein [Wolbachia pipientis wUni], ONI56815.1 anticodon-binding domain protein [Wolbachia pipientis wUni]	OEY86585.1 leucine--tRNA ligase [Wolbachia pipientis]		OG0000086	1	1	1	1	1	1	1	1	1	1	1	1	1	1	1	1	2	1		1.05556	0.235702		OG0000086	-0.235702	-0.235702	-0.235702	-0.235702	-0.235702	-0.235702
OG0000087	wOo_09930 wOo_09930 hypothetical protein 900424_900759 reverse MW_12698	WP_014869261.1 MULTISPECIES_ hypothetical protein [Wolbachia]		BAP00027.1 putative uncharacterized protein [Wolbachia endosymbiont of Cimex lectularius], BAP00329.1 hypothetical protein WCLE_010430 [Wolbachia endosymbiont of Cimex lectularius], BAP00418.1 hypothetical protein WCLE_011340 [Wolbachia endosymbiont of Cimex lectularius]	CDR78530.1 hypothetical protein WPAU_0134 [Wolbachia], CDR79104.1 Wolbachia palindromic element domain [Wolbachia]	AAS14417.1 hypothetical protein WD_0725 [Wolbachia endosymbiont of Drosophila melanogaster], AAS14437.1 hypothetical protein WD_0746 [Wolbachia endosymbiont of Drosophila melanogaster], AAS14495.1 hypothetical protein WD_0808 [Wolbachia endosymbiont of Drosophila melanogaster], AAS14512.1 hypothetical protein WD_0825 [Wolbachia endosymbiont of Drosophila melanogaster]			AGJ98774.1 hypothetical protein wNo_03420 [Wolbachia endosymbiont of Drosophila simulans wNo]	CAQ54754.1 hypothetical protein WP0646 [Wolbachia endosymbiont of Culex quinquefasciatus Pel]		WP_019078672.1 MULTISPECIES_ hypothetical protein [Wolbachia]	WP_047759785.1 hypothetical protein [Wolbachia endosymbiont of Armadillidium vulgare]	wFol_02320 wFol_02320 Uncharacterized protein 269911_270618 reverse MW_26812	OCA06368.1 hypothetical protein wTpre_699 [Wolbachia endosymbiont of Trichogramma pretiosum], OCA06907.1 hypothetical protein wTpre_1259 [Wolbachia endosymbiont of Trichogramma pretiosum]	wLcla10360 wLcla10360 Uncharacterized protein 943532_943939 reverse MW_15893				OG0000087	1	1	0	3	2	4	0	0	1	1	0	1	1	1	2	1	0	0		1.05556	1.10997		OG0000087	-0.0500516	-0.0500516	-0.950979	1.7518	0.850876	2.65273
OG0000088	wOo_02270 wOo_02270 enoyl-[acyl-carrier-protein] reductase NADH- 203271_204074 reverse MW_29125	WP_014868810.1 MULTISPECIES_ enoyl-ACP reductase [Wolbachia]	gi|58584727|ref|YP_198300.1| Enoyl-[acyl-carrier-protein] reductase _NADH_ [Wolbachia endosymbiont strain TRS of Brugia malayi]	BAP00175.1 enoyl-acyl-carrier-protein reductase [Wolbachia endosymbiont of Cimex lectularius]	CDR78544.1 enoyl-ACP reductase_Enoyl-[acyl-carrier-protein] reductase [NADH] FabI_enoyl-_acyl carrier protein_ reductase_Uncharacterized conserved protein_3-oxoacyl-[acyl-carrier-protein] reductase_short chain dehydrogenase [Wolbachia]	AAS13845.1 enoyl-_acyl-carrier-protein_ reductase [Wolbachia endosymbiont of Drosophila melanogaster]	AGJ99628.1 Enoyl-[acyl-carrier-protein] reductase [Wolbachia endosymbiont of Drosophila simulans wHa]	ACN95009.1 enoyl-_acyl-carrier-protein_ reductase [Wolbachia sp. wRi]	AGJ98515.1 Enoyl-[acyl-carrier-protein] reductase [Wolbachia endosymbiont of Drosophila simulans wNo]	CAQ54175.1 enoyl-_acyl-carrier-protein_ reductase [Wolbachia endosymbiont of Culex quinquefasciatus Pel]	WP_006280349.1 MULTISPECIES_ enoyl-ACP reductase [Wolbachia]	WP_007302843.1 MULTISPECIES_ enoyl-ACP reductase [Wolbachia]	WP_047758781.1 enoyl-ACP reductase [Wolbachia endosymbiont of Armadillidium vulgare]	wFol_08310 fabI Enoyl-[acyl-carrier-protein] reductase [NADH] 993502_994311 reverse MW_29620	OCA06006.1 enoyl-[acyl-carrier-protein] reductase [NADH] [Wolbachia endosymbiont of Trichogramma pretiosum]	wLcla00400 fabI Enoyl-[acyl-carrier-protein] reductase [NADH] 31331_32107 forward MW_28191, wLcla02770 fabI Enoyl-[acyl-carrier-protein] reductase [NADH] 244627_245403 reverse MW_28191	ONI56752.1 enoyl-[acyl-carrier-protein] reductase [NADH] 1 [Wolbachia pipientis wUni]	OEY86503.1 enoyl-ACP reductase [Wolbachia pipientis]		OG0000088	1	1	1	1	1	1	1	1	1	1	1	1	1	1	1	2	1	1		1.05556	0.235702		OG0000088	-0.235702	-0.235702	-0.235702	-0.235702	-0.235702	-0.235702
OG0000089	wOo_05850 wOo_05850 membrane GTPase involved in stress response 513617_515437 reverse MW_67187	WP_025263992.1 GTP-binding protein [Wolbachia endosymbiont of Onchocerca volvulus]	gi|58584322|ref|YP_197895.1| Predicted membrane GTPase involved in stress response [Wolbachia endosymbiont strain TRS of Brugia malayi]	BAO99615.1 GTP-binding protein TypA [Wolbachia endosymbiont of Cimex lectularius]	CDR78609.1 GTP-binding protein TypA_Tyrosine phosphorylated protein A_GTP-binding protein_GTPases-translation elongation factors_GTP-binding protein TypA/BipA_Elongation factor Tu GTP binding domain [Wolbachia]	AAS13971.1 elongation factor Tu family protein [Wolbachia endosymbiont of Drosophila melanogaster]	AGJ99664.1 GTP-binding protein TypA [Wolbachia endosymbiont of Drosophila simulans wHa]	ACN95047.1 GTP-binding protein TypA [Wolbachia sp. wRi]	AGJ99364.1 GTP-binding protein_ TypA [Wolbachia endosymbiont of Drosophila simulans wNo]	CAQ54273.1 GTP-binding protein_ typA [Wolbachia endosymbiont of Culex quinquefasciatus Pel]	WP_038199752.1 GTP-binding protein [Wolbachia pipientis]	WP_007302691.1 MULTISPECIES_ GTP-binding protein [Wolbachia]	WP_047758829.1 hypothetical protein [Wolbachia endosymbiont of Armadillidium vulgare], WP_047759520.1 GTP-binding protein TypA [Wolbachia endosymbiont of Armadillidium vulgare]	wFol_04350 typA GTP-binding protein TypA 532878_534707 forward MW_67202	OCA06100.1 GTP-binding protein TypA/BipA [Wolbachia endosymbiont of Trichogramma pretiosum]	wLcla03000 typA GTP-binding protein TypA 262759_264588 reverse MW_67256	ONI56678.1 GTP-binding protein TypA/BipA_ partial [Wolbachia pipientis wUni]	OEY86382.1 GTP-binding protein TypA [Wolbachia pipientis]		OG0000089	1	1	1	1	1	1	1	1	1	1	1	1	2	1	1	1	1	1		1.05556	0.235702		OG0000089	-0.235702	-0.235702	-0.235702	-0.235702	-0.235702	-0.235702
OG0000090	wOo_06980 wOo_06980 NAD-specific glutamate dehydrogenase 623666_628399 reverse MW_181546	WP_025264047.1 glutamate dehydrogenase [Wolbachia endosymbiont of Onchocerca volvulus]	gi|58584442|ref|YP_198015.1| NAD-specific glutamate dehydrogenase [Wolbachia endosymbiont strain TRS of Brugia malayi]	BAO99828.1 NAD-specific glutamate dehydrogenase [Wolbachia endosymbiont of Cimex lectularius]	CDR78611.1 NAD-specific glutamate dehydrogenase_NAD-specific glutamate dehydrogenase_NAD-specific glutamate dehydrogenase_Bacterial NAD-glutamate dehydrogenase [Wolbachia]	AAS13967.1 conserved hypothetical protein [Wolbachia endosymbiont of Drosophila melanogaster]	AGJ99668.1 Putative NAD-glutamate dehydrogenase [Wolbachia endosymbiont of Drosophila simulans wHa]	ACN95043.1 hypothetical protein WRi_002120 [Wolbachia sp. wRi]	AGJ98541.1 Nad-dependent glutamate dehydrogenase [Wolbachia endosymbiont of Drosophila simulans wNo]	CAQ54464.1 nad-dependent glutamate dehydrogenase [Wolbachia endosymbiont of Culex quinquefasciatus Pel]	WP_038199737.1 glutamate dehydrogenase [Wolbachia pipientis]	WP_019236520.1 nad-dependent glutamate dehydrogenase [Wolbachia pipientis]	WP_047759388.1 glutamate dehydrogenase [Wolbachia endosymbiont of Armadillidium vulgare]	wFol_04130 wFol_04130 NAD-glutamate dehydrogenase 505143_509852 reverse MW_179695	OCA06231.1 bacterial NAD-glutamate dehydrogenase family protein [Wolbachia endosymbiont of Trichogramma pretiosum]	wLcla04680 gdhB Nad-dependent glutamate dehydrogenase 409285_413955 reverse MW_178306	ONI56700.1 bacterial NAD-glutamate dehydrogenase family protein [Wolbachia pipientis wUni], ONI56701.1 wolbachia palindromic element domain protein [Wolbachia pipientis wUni]	OEY86575.1 glutamate dehydrogenase [Wolbachia pipientis]		OG0000090	1	1	1	1	1	1	1	1	1	1	1	1	1	1	1	1	2	1		1.05556	0.235702		OG0000090	-0.235702	-0.235702	-0.235702	-0.235702	-0.235702	-0.235702
OG0000091	wOo_07200 wOo_07200 nucleotide-binding protein implicated in inhibiti on of septum formation 647396_647992 forward MW_22529	WP_014869088.1 MULTISPECIES_ septum formation inhibitor Maf [Wolbachia]	gi|58584452|ref|YP_198025.1| Nucleotide-binding protein implicated in inhibition of septum formation [Wolbachia endosymbiont strain TRS of Brugia malayi]	BAO99985.1 septum formation protein [Wolbachia endosymbiont of Cimex lectularius], BAP00161.1 septum formation protein [Wolbachia endosymbiont of Cimex lectularius]	CDR78760.1 Maf-like protein_Maf-like protein yhdE_Maf-like protein_Nucleotide-binding protein implicated in inhibition of septum formation_septum formation protein Maf_Maf-like protein [Wolbachia]	AAS14065.1 maf protein [Wolbachia endosymbiont of Drosophila melanogaster]	AGJ99960.1 Maf-like protein [Wolbachia endosymbiont of Drosophila simulans wHa]	ACN95240.1 maf-like protein [Wolbachia sp. wRi]	AGJ98527.1 Maf-like protein [Wolbachia endosymbiont of Drosophila simulans wNo]	CAQ54145.1 maf-like protein [Wolbachia endosymbiont of Culex quinquefasciatus Pel]	WP_010082554.1 MULTISPECIES_ maf-like protein [Wolbachia]	WP_007302819.1 MULTISPECIES_ septum formation inhibitor Maf [Wolbachia]	WP_047759712.1 septum formation inhibitor Maf [Wolbachia endosymbiont of Armadillidium vulgare]	wFol_00270 maf Maf-like protein maf 31076_31684 forward MW_22807	OCA06127.1 septum formation protein Maf [Wolbachia endosymbiont of Trichogramma pretiosum]	wLcla03750 maf Maf-like protein maf 324300_324905 reverse MW_22737	ONI56408.1 septum formation protein Maf [Wolbachia pipientis wUni]	OEY87060.1 septum formation protein Maf [Wolbachia pipientis]		OG0000091	1	1	1	2	1	1	1	1	1	1	1	1	1	1	1	1	1	1		1.05556	0.235702		OG0000091	-0.235702	-0.235702	-0.235702	4.00694	-0.235702	-0.235702
OG0000092	wOo_06120 wOo_06120 DNA primase DnaG 547334_549121 forward MW_68510	WP_025264006.1 DNA primase [Wolbachia endosymbiont of Onchocerca volvulus]	gi|58584454|ref|YP_198027.1| DNA primase_ DnaG [Wolbachia endosymbiont strain TRS of Brugia malayi]	BAO99652.1 DNA primase DnaG [Wolbachia endosymbiont of Cimex lectularius]	CDR78778.1 DNA primase_DNA primase_DNA primase_DNA primase _bacterial type__DNA primase_DNA primase catalytic core_ N-terminal domain [Wolbachia]	AAS14077.1 DNA primase [Wolbachia endosymbiont of Drosophila melanogaster]	AGJ99950.1 DNA primase [Wolbachia endosymbiont of Drosophila simulans wHa]	ACN95229.1 DNA primase_ DnaG [Wolbachia sp. wRi]	AGJ99351.1 DNA primase [Wolbachia endosymbiont of Drosophila simulans wNo]	CAQ54290.1 DNA primase [Wolbachia endosymbiont of Culex quinquefasciatus Pel]	WP_010082533.1 MULTISPECIES_ DNA primase [Wolbachia]	WP_019236374.1 MULTISPECIES_ DNA primase [Wolbachia]	WP_047758672.1 DNA primase [Wolbachia endosymbiont of Armadillidium vulgare]	wFol_07650 dnaG DNA primase 907793_909553 forward MW_67803	OCA06033.1 DNA primase [Wolbachia endosymbiont of Trichogramma pretiosum]	wLcla11860 dnaG DNA primase 1086367_1088100 forward MW_66324	ONI56550.1 toprim domain protein_ partial [Wolbachia pipientis wUni]	OEY86542.1 DNA primase [Wolbachia pipientis], OEY86666.1 hypothetical protein BIY23_03135 [Wolbachia pipientis]		OG0000092	1	1	1	1	1	1	1	1	1	1	1	1	1	1	1	1	1	2		1.05556	0.235702		OG0000092	-0.235702	-0.235702	-0.235702	-0.235702	-0.235702	-0.235702
OG0000093	wOo_06110 wOo_06110 3-demethylubiquinone-9 3-methyltransferase 546001_547167 reverse MW_43722	WP_025264005.1 multifunctional ribose 5-phosphate isomerase B/3-demethylubiquinone-9 3-methyltransferase/2-octaprenyl-6-hydroxy phenol methylase [Wolbachia endosymbiont of Onchocerca volvulus]	gi|58584455|ref|YP_198028.1| 2-polyprenyl-3-methyl-5-hydroxy-6-metoxy-1_4-benzoquinol methylase [Wolbachia endosymbiont strain TRS of Brugia malayi]	BAO99653.1 3-demethylubiquinone-9 3-methyltransferase [Wolbachia endosymbiont of Cimex lectularius]	CDR78779.1 3-demethylubiquinone-9 3-methyltransferase_3-demethylubiquinone-9 3-methyltransferase_bifunctional 3-demethylubiquinone-9 3-methyltransferase/ 2-octaprenyl-6-hydroxy phenol methylase_Predicted methyltransferase _contains TPR repeat__3-demethylubiquinone-9 3-O-methyltransferase_Ribose/Galactose Isomerase [Wolbachia]	AAS14079.1 3-demethylubiquinone-9 3-methyltransferase/sugar-phosphate isomerase family protein [Wolbachia endosymbiont of Drosophila melanogaster]	AGJ99949.1 3-demethylubiquinone-9 3-methyltransferase/sugar-phosphate isomerase family protein [Wolbachia endosymbiont of Drosophila simulans wHa]	ACN95228.1 3-demethylubiquinone-9 3-methyltransferase [Wolbachia sp. wRi]	AGJ99350.1 3-demethylubiquinone-9 3-methyltransferase/sugar-phosphate isomerase family protein [Wolbachia endosymbiont of Drosophila simulans wNo]	CAQ54291.1 3-demethylubiquinone-9 3-methyltransferase/sugar-phosphate isomerase family protein [Wolbachia endosymbiont of Culex quinquefasciatus Pel]	WP_038198653.1 multifunctional ribose 5-phosphate isomerase B/3-demethylubiquinone-9 3-methyltransferase/2-octaprenyl-6-hydroxy phenol methylase [Wolbachia pipientis]	WP_019236375.1 multifunctional ribose 5-phosphate isomerase B/3-demethylubiquinone-9 3-methyltransferase/2-octaprenyl-6-hydroxy phenol methylase [Wolbachia pipientis]	WP_047758673.1 3-demethylubiquinone-9 3-methyltransferase [Wolbachia endosymbiont of Armadillidium vulgare]	wFol_00210 ubiG Ubiquinone biosynthesis O-methyltransferase 25950_27119 reverse MW_43839	OCA06034.1 3-demethylubiquinone-9 3-O-methyltransferase [Wolbachia endosymbiont of Trichogramma pretiosum]	wLcla11850 ubiG Ubiquinone biosynthesis O-methyltransferase 1085055_1086221 reverse MW_43435	ONI56436.1 ribose 5-phosphate isomerase B [Wolbachia pipientis wUni], ONI56634.1 3-demethylubiquinone-9 3-O-methyltransferase [Wolbachia pipientis wUni]	OEY86647.1 multifunctional ribose 5-phosphate isomerase B/3-demethylubiquinone-9 3-methyltransferase/2-octaprenyl-6-hydroxy phenol methylase [Wolbachia pipientis]		OG0000093	1	1	1	1	1	1	1	1	1	1	1	1	1	1	1	1	2	1		1.05556	0.235702		OG0000093	-0.235702	-0.235702	-0.235702	-0.235702	-0.235702	-0.235702
OG0000094	wOo_06100 wOo_06100 methionyl-tRNA synthetase 544397_545947 reverse MW_59411	WP_025264004.1 methionine--tRNA ligase [Wolbachia endosymbiont of Onchocerca volvulus]	gi|58584456|ref|YP_198029.1| Methionyl-tRNA synthetase [Wolbachia endosymbiont strain TRS of Brugia malayi]	BAO99460.1 methionyl-tRNA synthetase [Wolbachia endosymbiont of Cimex lectularius]	CDR78781.1 methionyl-tRNA synthetase_Methionine--tRNA ligase_methionyl-tRNA synthetase_Methionyl-tRNA synthetase_methionine--tRNA ligase_tRNA synthetases class I _M_ [Wolbachia]	AAS14081.1 methionyl-tRNA synthetase [Wolbachia endosymbiont of Drosophila melanogaster]	AGJ99947.1 Methionyl-tRNA synthetase [Wolbachia endosymbiont of Drosophila simulans wHa]	ACN95227.1 Methionyl-tRNA synthetase [Wolbachia sp. wRi]	AGJ99489.1 Methionyl-tRNA synthetase [Wolbachia endosymbiont of Drosophila simulans wNo]	CAQ54226.1 methionyl-tRNA synthetase [Wolbachia endosymbiont of Culex quinquefasciatus Pel]	WP_038198656.1 methionine--tRNA ligase [Wolbachia pipientis]	WP_019236350.1 methionine--tRNA ligase [Wolbachia pipientis]	WP_047759531.1 methionine--tRNA ligase [Wolbachia endosymbiont of Armadillidium vulgare]	wFol_13760 metG Methionine--tRNA ligase 1640567_1642111 reverse MW_59220	OCA06115.1 methionine--tRNA ligase [Wolbachia endosymbiont of Trichogramma pretiosum]	wLcla03670 metG Methionine--tRNA ligase 316114_317643 forward MW_58809	ONI56434.1 methionyl-tRNA synthetase [Wolbachia pipientis wUni], ONI56636.1 methionyl-tRNA synthetase [Wolbachia pipientis wUni]	OEY86648.1 methionine--tRNA ligase [Wolbachia pipientis]		OG0000094	1	1	1	1	1	1	1	1	1	1	1	1	1	1	1	1	2	1		1.05556	0.235702		OG0000094	-0.235702	-0.235702	-0.235702	-0.235702	-0.235702	-0.235702
OG0000095				BAO99906.1 putative uncharacterized protein [Wolbachia endosymbiont of Cimex lectularius]	CDR78826.1 Wolbachia palindromic element domain [Wolbachia], CDR78879.1 hypothetical protein WPAU_0491 [Wolbachia], CDR79300.1 SAM-dependent methyltransferase [Wolbachia]	AAS13866.1 hypothetical protein WD_0111 [Wolbachia endosymbiont of Drosophila melanogaster], AAS13984.1 hypothetical protein WD_0241 [Wolbachia endosymbiont of Drosophila melanogaster], AAS14131.1 hypothetical protein WD_0406 [Wolbachia endosymbiont of Drosophila melanogaster], AAS14179.1 hypothetical protein WD_0459 [Wolbachia endosymbiont of Drosophila melanogaster], AAS14438.1 hypothetical pro…				CAQ54968.1 Hypothetical protein WP0860 [Wolbachia endosymbiont of Culex quinquefasciatus Pel]	WP_010962608.1 MULTISPECIES_ hypothetical protein [Wolbachia], WP_038199256.1 hypothetical protein [Wolbachia pipientis]						ONI56059.1 ATP synthase beta subunit/transription termination factor rho [Wolbachia pipientis wUni], ONI56455.1 wolbachia palindromic element domain protein_ partial [Wolbachia pipientis wUni], ONI56572.1 hypothetical protein N500_0344_ partial [Wolbachia pipientis wUni], ONI56669.1 hypothetical protein N500_0255 [Wolbachia pipientis wUni]			OG0000095	0	0	0	1	3	8	0	0	0	1	2	0	0	0	0	0	4	0		1.05556	2.09964		OG0000095	-0.502731	-0.502731	-0.502731	-0.0264595	0.926084	3.30744
OG0000096	wOo_06690 wOo_06690 GTP-binding protein LepA 598374_600173 reverse MW_67151	WP_025264033.1 elongation factor 4 [Wolbachia endosymbiont of Onchocerca volvulus]	gi|58584924|ref|YP_198497.1| Membrane GTPase LepA [Wolbachia endosymbiont strain TRS of Brugia malayi]	BAO99718.1 GTP-binding protein LepA [Wolbachia endosymbiont of Cimex lectularius]	CDR78899.1 GTP-binding protein LepA_Elongation factor 4_GTP-binding protein LepA_GTPases-translation elongation factors_GTP-binding protein LepA_GTP-binding protein LepA C-terminus [Wolbachia]	AAS14195.1 GTP-binding protein LepA [Wolbachia endosymbiont of Drosophila melanogaster]	AGJ99774.1 Elongation factor 4 [Wolbachia endosymbiont of Drosophila simulans wHa]	ACN95115.1 GTP-binding protein LepA [Wolbachia sp. wRi]	AGJ98600.1 Elongation factor 4 [Wolbachia endosymbiont of Drosophila simulans wNo]	CAQ54604.1 GTP-binding protein LepA [Wolbachia endosymbiont of Culex quinquefasciatus Pel]	WP_010082651.1 MULTISPECIES_ elongation factor 4 [Wolbachia]	WP_007301936.1 MULTISPECIES_ elongation factor 4 [Wolbachia]	WP_047759428.1 GTP-binding protein LepA [Wolbachia endosymbiont of Armadillidium vulgare]	wFol_08140 lepA Elongation factor 4 977021_978817 reverse MW_66349	OCA05749.1 GTP-binding protein LepA [Wolbachia endosymbiont of Trichogramma pretiosum]	wLcla00930 lepA Elongation factor 4 71885_73681 reverse MW_66602	ONI56390.1 GTP-binding protein LepA family protein_ partial [Wolbachia pipientis wUni], ONI56626.1 GTP-binding protein LepA [Wolbachia pipientis wUni]	OEY86536.1 elongation factor 4 [Wolbachia pipientis]		OG0000096	1	1	1	1	1	1	1	1	1	1	1	1	1	1	1	1	2	1		1.05556	0.235702		OG0000096	-0.235702	-0.235702	-0.235702	-0.235702	-0.235702	-0.235702
OG0000097	wOo_06600 wOo_06600 porphobilinogen deaminase 593377_594255 forward MW_32759	WP_014869049.1 MULTISPECIES_ hydroxymethylbilane synthase [Wolbachia]	gi|58585034|ref|YP_198607.1| Porphobilinogen deaminase [Wolbachia endosymbiont strain TRS of Brugia malayi]	BAO99508.1 hydroxymethylbilane synthase [Wolbachia endosymbiont of Cimex lectularius]	CDR78943.1 porphobilinogen deaminase_Porphobilinogen deaminase_porphobilinogen deaminase_Uroporphyrinogen-III synthase_porphobilinogen deaminase_Porphobilinogen deaminase_ dipyromethane cofactor binding domain [Wolbachia]	AAS14252.1 porphobilinogen deaminase [Wolbachia endosymbiont of Drosophila melanogaster]	AGJ99894.1 Porphobilinogen deaminase [Wolbachia endosymbiont of Drosophila simulans wHa]	ACN95165.1 porphobilinogen deaminase [Wolbachia sp. wRi]	AGJ98586.1 Porphobilinogen deaminase [Wolbachia endosymbiont of Drosophila simulans wNo]	CAQ54582.1 porphobilinogen deaminase [Wolbachia endosymbiont of Culex quinquefasciatus Pel]	WP_010962666.1 MULTISPECIES_ hydroxymethylbilane synthase [Wolbachia]	WP_019236605.1 hydroxymethylbilane synthase [Wolbachia pipientis]	WP_047758777.1 porphobilinogen deaminase [Wolbachia endosymbiont of Armadillidium vulgare]	wFol_14910 hemC Porphobilinogen deaminase 1770929_1771807 reverse MW_32579	OCA05788.1 porphobilinogen deaminase [Wolbachia endosymbiont of Trichogramma pretiosum]	wLcla00680 hemC Porphobilinogen deaminase 52700_53578 reverse MW_32608	ONI56502.1 porphobilinogen deaminase [Wolbachia pipientis wUni]	OEY87009.1 hydroxymethylbilane synthase [Wolbachia pipientis], OEY87163.1 hypothetical protein BIY23_01660 [Wolbachia pipientis]		OG0000097	1	1	1	1	1	1	1	1	1	1	1	1	1	1	1	1	1	2		1.05556	0.235702		OG0000097	-0.235702	-0.235702	-0.235702	-0.235702	-0.235702	-0.235702
OG0000098	wOo_07910 wOo_07910 HesBYadRYfhF family protein 706488_706958 reverse MW_17419	WP_025264090.1 heme biosynthesis protein HemY [Wolbachia endosymbiont of Onchocerca volvulus]	gi|58584285|ref|YP_197858.1| HesB/YadR/YfhF family protein [Wolbachia endosymbiont strain TRS of Brugia malayi]	BAP00018.1 HesB/YadR/YfhF family protein [Wolbachia endosymbiont of Cimex lectularius]	CDR79085.1 HesB/YadR/YfhF family protein_Iron-sulfur cluster insertion protein erpA_iron-sulfur cluster insertion protein ErpA_iron-sulfur cluster assembly accessory protein_Iron-sulphur cluster biosynthesis [Wolbachia]	AAS14402.1 HesB/YadR/YfhF family protein [Wolbachia endosymbiont of Drosophila melanogaster]	AGK00044.1 HesB/YadR/YfhF family protein [Wolbachia endosymbiont of Drosophila simulans wHa]	ACN95415.1 HesB/YadR/YfhF family protein [Wolbachia sp. wRi]	AGJ98906.1 HesB/YadR/YfhF family protein [Wolbachia endosymbiont of Drosophila simulans wNo]	CAQ54933.1 HesB/YadR/YfhF family protein [Wolbachia endosymbiont of Culex quinquefasciatus Pel]	WP_010081891.1 hypothetical protein [Wolbachia pipientis]	WP_019236790.1 MULTISPECIES_ heme biosynthesis protein HemY [Wolbachia]	WP_047759212.1 heme biosynthesis protein HemY [Wolbachia endosymbiont of Armadillidium vulgare]	wFol_00070 wFol_00070 Putative iron-sulfur cluster biogenesis protein 9956_10417 forward MW_16965	OCA06612.1 iron-sulfur cluster insertion protein erpA [Wolbachia endosymbiont of Trichogramma pretiosum]	wLcla07140 wLcla07140 Iron-sulfur cluster biosynthesis protein family protein 657411_657857 reverse MW_16356	ONI56248.1 iron-sulfur cluster insertion protein erpA [Wolbachia pipientis wUni], ONI56264.1 hypothetical protein N500_0661_ partial [Wolbachia pipientis wUni]	OEY86700.1 heme biosynthesis protein HemY [Wolbachia pipientis]		OG0000098	1	1	1	1	1	1	1	1	1	1	1	1	1	1	1	1	2	1		1.05556	0.235702		OG0000098	-0.235702	-0.235702	-0.235702	-0.235702	-0.235702	-0.235702
OG0000099	wOo_08110 wOo_08110 Outer membrane protein 724906_726801 reverse MW_70904	WP_025264102.1 membrane protein [Wolbachia endosymbiont of Onchocerca volvulus]	gi|58584271|ref|YP_197844.1| Probable outer membrane protein [Wolbachia endosymbiont strain TRS of Brugia malayi]	BAO99601.1 putative outer membrane protein [Wolbachia endosymbiont of Cimex lectularius]	CDR79124.1 Putative outer membrane protein [Wolbachia]	AAS14436.1 hypothetical protein WD_0745 [Wolbachia endosymbiont of Drosophila melanogaster]	AGK00076.1 Putative outer membrane protein [Wolbachia endosymbiont of Drosophila simulans wHa]	ACN95481.1 Putative outer membrane protein [Wolbachia sp. wRi]	AGJ98802.1 Putative outer membrane protein [Wolbachia endosymbiont of Drosophila simulans wNo]	CAQ54817.1 Putative outer membrane protein [Wolbachia endosymbiont of Culex quinquefasciatus Pel]	WP_038199030.1 membrane protein [Wolbachia pipientis]	WP_012481890.1 MULTISPECIES_ membrane protein [Wolbachia]	WP_047759234.1 membrane protein [Wolbachia endosymbiont of Armadillidium vulgare]	wFol_01690 wFol_01690 Putative outer membrane protein 195477_198047 forward MW_92699	OCA06815.1 gram-negative porin family protein [Wolbachia endosymbiont of Trichogramma pretiosum]	wLcla09580 wLcla09580 Putative outer membrane protein 872906_874948 forward MW_75697	ONI56216.1 hypothetical protein N500_0709_ partial [Wolbachia pipientis wUni], ONI56519.1 hypothetical protein N500_0374_ partial [Wolbachia pipientis wUni]	OEY86653.1 hypothetical protein BIY23_03065 [Wolbachia pipientis]		OG0000099	1	1	1	1	1	1	1	1	1	1	1	1	1	1	1	1	2	1		1.05556	0.235702		OG0000099	-0.235702	-0.235702	-0.235702	-0.235702	-0.235702	-0.235702
OG0000100	wOo_09170 wOo_09170 DNA polymerase III alpha subunit 828018_831353 reverse MW_126666	WP_025264145.1 DNA polymerase III subunit alpha [Wolbachia endosymbiont of Onchocerca volvulus]	gi|58584756|ref|YP_198329.1| DNA polymerase III alpha subunit [Wolbachia endosymbiont strain TRS of Brugia malayi]	BAP00525.1 DNA polymerase III alpha subunit [Wolbachia endosymbiont of Cimex lectularius]	CDR79156.1 DNA polymerase III_ alpha subunit_DNA polymerase III subunit alpha_DNA polymerase III subunit alpha_DNA polymerase III_ alpha subunit_Bacterial DNA polymerase III alpha subunit [Wolbachia]	AAS14468.1 DNA polymerase III_ alpha subunit [Wolbachia endosymbiont of Drosophila melanogaster]	AGK00104.1 DNA polymerase III_ alpha subunit [Wolbachia endosymbiont of Drosophila simulans wHa]	ACN95393.1 DNA polymerase III_ alpha subunit [Wolbachia sp. wRi]	AGJ98781.1 DNA polymerase III_ alpha subunit [Wolbachia endosymbiont of Drosophila simulans wNo]	CAQ54766.1 DNA polymerase III_ alpha subunit [Wolbachia endosymbiont of Culex quinquefasciatus Pel]	WP_038199102.1 DNA polymerase III subunit alpha [Wolbachia pipientis]	WP_012481876.1 MULTISPECIES_ DNA polymerase III subunit alpha [Wolbachia]	WP_047759589.1 DNA polymerase III subunit alpha [Wolbachia endosymbiont of Armadillidium vulgare]	wFol_10940 wFol_10940 DNA-directed DNA polymerase 1311232_1314693 reverse MW_130417	OCA06891.1 DNA polymerase III subunit alpha [Wolbachia endosymbiont of Trichogramma pretiosum]	wLcla10220 dnaE DNA-directed DNA polymerase 929572_932892 reverse MW_125278	ONI56265.1 DNA polymerase III subunit alpha [Wolbachia pipientis wUni], ONI56266.1 DNA polymerase III_ alpha subunit [Wolbachia pipientis wUni]	OEY86677.1 DNA polymerase III subunit alpha [Wolbachia pipientis]		OG0000100	1	1	1	1	1	1	1	1	1	1	1	1	1	1	1	1	2	1		1.05556	0.235702		OG0000100	-0.235702	-0.235702	-0.235702	-0.235702	-0.235702	-0.235702
OG0000101	wOo_02310 wOo_02310 EndoIII-related endonuclease 210127_210768 reverse MW_24063	WP_025264307.1 endonuclease III [Wolbachia endosymbiont of Onchocerca volvulus]	gi|58584622|ref|YP_198195.1| Predicted EndoIII-related endonuclease [Wolbachia endosymbiont strain TRS of Brugia malayi]	BAO99433.1 endonuclease III [Wolbachia endosymbiont of Cimex lectularius]	CDR79162.1 endonuclease III_Endonuclease III_endonuclease III_3-methyladenine DNA glycosylase/8-oxoguanine DNA glycosylase_endonuclease III_HhH-GPD superfamily base excision DNA repair protein [Wolbachia]	AAS14477.1 endonuclease III [Wolbachia endosymbiont of Drosophila melanogaster]	AGK00111.1 Endonuclease III [Wolbachia endosymbiont of Drosophila simulans wHa]	ACN95400.1 endonuclease III [Wolbachia sp. wRi]	AGJ98684.1 Endonuclease III [Wolbachia endosymbiont of Drosophila simulans wNo]	CAQ54653.1 endonuclease III [Wolbachia endosymbiont of Culex quinquefasciatus Pel]	WP_010082499.1 MULTISPECIES_ endonuclease III [Wolbachia]	WP_007301977.1 MULTISPECIES_ endonuclease III [Wolbachia]	WP_047759000.1 DNA lyase [Wolbachia endosymbiont of Armadillidium vulgare]	wFol_03480 nth Endonuclease III 407549_408199 reverse MW_24409	OCA05703.1 endonuclease III [Wolbachia endosymbiont of Trichogramma pretiosum]	wLcla00040 nth Endonuclease III 1328_1948 reverse MW_23065, wLcla12180 nth Endonuclease III 1118830_1119477 forward MW_24219	ONI56274.1 endonuclease III [Wolbachia pipientis wUni]	OEY86420.1 endonuclease III [Wolbachia pipientis]		OG0000101	1	1	1	1	1	1	1	1	1	1	1	1	1	1	1	2	1	1		1.05556	0.235702		OG0000101	-0.235702	-0.235702	-0.235702	-0.235702	-0.235702	-0.235702
OG0000102	wOo_01300 wOo_01300 Type IV secretory pathway VirB4 components 111131_113536 forward MW_91548	WP_025264267.1 type IV secretion system ATPase VirB4 [Wolbachia endosymbiont of Onchocerca volvulus]	gi|58585054|ref|YP_198627.1| Type IV secretory pathway_ VirB4 components [Wolbachia endosymbiont strain TRS of Brugia malayi]	BAP00307.1 type IV secretion system protein VirB4 [Wolbachia endosymbiont of Cimex lectularius]	CDR79220.1 type IV secretion system ATPase VirB4_Type IV secretion system protein virB4_type IV secretion system ATPase VirB4_Type IV secretory pathway_ VirB4 components_type IV secretion/conjugal transfer ATPase_ VirB4 family_CagE_ TrbE_ VirB family_ component of type IV transporter system [Wolbachia]	AAS14542.1 type IV secretion system protein VirB4 [Wolbachia endosymbiont of Drosophila melanogaster]	AGK00172.1 Type IV secretion system protein VirB4 [Wolbachia endosymbiont of Drosophila simulans wHa]	ACN95562.1 Type IV secretion pathway protein VirB4 [Wolbachia sp. wRi]	AGJ98735.1 Type IV secretion system protein VirB4 [Wolbachia endosymbiont of Drosophila simulans wNo]	CAQ54711.1 type IV secretion system protein VirB4 [Wolbachia endosymbiont of Culex quinquefasciatus Pel]	WP_038199157.1 type IV secretion system ATPase VirB4 [Wolbachia pipientis]	WP_007302030.1 MULTISPECIES_ transporter [Wolbachia]	WP_047759807.1 type IV secretion system ATPase VirB4 [Wolbachia endosymbiont of Armadillidium vulgare]	wFol_12760 virB4 Type IV secretion system protein VirB4 1504036_1506441 forward MW_91205	OCA06961.1 type IV secretion/conjugal transfer ATPase_ VirB4 family protein [Wolbachia endosymbiont of Trichogramma pretiosum]	wLcla10820 virB4 Type IV secretion system protein VirB4 995412_997817 forward MW_91272	ONI56152.1 type IV secretion system protein VirB4 domain protein_ partial [Wolbachia pipientis wUni], ONI56157.1 type IV secretion system protein VirB4 domain protein_ partial [Wolbachia pipientis wUni]	OEY87064.1 type IV secretion system protein VirB4 [Wolbachia pipientis]		OG0000102	1	1	1	1	1	1	1	1	1	1	1	1	1	1	1	1	2	1		1.05556	0.235702		OG0000102	-0.235702	-0.235702	-0.235702	-0.235702	-0.235702	-0.235702
OG0000103	wOo_10560 wOo_10560 methionyl-tRNA formyltransferase 944743_945636 reverse MW_33286	WP_025264208.1 methionyl-tRNA formyltransferase [Wolbachia endosymbiont of Onchocerca volvulus]	gi|58584913|ref|YP_198486.1| Methionyl-tRNA formyltransferase [Wolbachia endosymbiont strain TRS of Brugia malayi]	BAP00202.1 methionyl-tRNA formyltransferase [Wolbachia endosymbiont of Cimex lectularius]	CDR79228.1 methionyl-tRNA formyltransferase_Methionyl-tRNA formyltransferase_methionyl-tRNA formyltransferase_Folate-dependent phosphoribosylglycinamide formyltransferase PurN_methionyl-tRNA formyltransferase_Formyl transferase [Wolbachia]	AAS14550.1 methionyl-tRNA formyltransferase [Wolbachia endosymbiont of Drosophila melanogaster]	AGK00179.1 Methionyl-tRNA formyltransferase [Wolbachia endosymbiont of Drosophila simulans wHa]	ACN95569.1 methionyl-tRNA formyltransferase [Wolbachia sp. wRi]	AGJ98682.1 Methionyl-tRNA formyltransferase [Wolbachia endosymbiont of Drosophila simulans wNo]	CAQ54769.1 methionyl-tRNA formyltransferase [Wolbachia endosymbiont of Culex quinquefasciatus Pel]	WP_010962892.1 MULTISPECIES_ methionyl-tRNA formyltransferase [Wolbachia]	WP_012481877.1 MULTISPECIES_ methionyl-tRNA formyltransferase [Wolbachia]	WP_047758840.1 methionyl-tRNA formyltransferase [Wolbachia endosymbiont of Armadillidium vulgare]	wFol_06510 fmt Methionyl-tRNA formyltransferase 777753_778661 reverse MW_33812	OCA05698.1 methionyl-tRNA formyltransferase [Wolbachia endosymbiont of Trichogramma pretiosum]	wLcla12030 fmt Methionyl-tRNA formyltransferase 1107323_1108222 reverse MW_33200	ONI56151.1 methionyl-tRNA formyltransferase family protein_ partial [Wolbachia pipientis wUni]	OEY86747.1 methionyl-tRNA formyltransferase [Wolbachia pipientis], OEY87030.1 hypothetical protein BIY23_00890 [Wolbachia pipientis]		OG0000103	1	1	1	1	1	1	1	1	1	1	1	1	1	1	1	1	1	2		1.05556	0.235702		OG0000103	-0.235702	-0.235702	-0.235702	-0.235702	-0.235702	-0.235702
OG0000104	wOo_00650 wOo_00650 putative monovalent cationH+ antiporter subunit D 54758_56233 reverse MW_54934	WP_025264246.1 monovalent cation/H+ antiporter subunit D [Wolbachia endosymbiont of Onchocerca volvulus]	gi|58584277|ref|YP_197850.1| Multisubunit Na+/H+ antiporter_ MnhD subunit [Wolbachia endosymbiont strain TRS of Brugia malayi]	BAP00182.1 putative monovalent cation/H+ antiporter subunit D [Wolbachia endosymbiont of Cimex lectularius]	CDR79254.1 monovalent cation/H antiporter subunit D_Multiple resistance and pH homeostasis protein D_putative monovalent cation/H antiporter subunit D_Multisubunit Na /H antiporter_ MnhB subunit_multicomponent K _H antiporter_NADH-Ubiquinone/plastoquinone _complex I__ various chains [Wolbachia]	AAS14761.1 Na+/H+ antiporter subunit_ putative [Wolbachia endosymbiont of Drosophila melanogaster]	AGK00341.1 NADH-ubiquinone oxidoreductase family protein [Wolbachia endosymbiont of Drosophila simulans wHa]	ACN95960.1 putative monovalent cation/H+ antiporter subunit D [Wolbachia sp. wRi]	AGJ98926.1 Nadh dehydrogenase _Quinone_ [Wolbachia endosymbiont of Drosophila simulans wNo]	CAQ55125.1 nadh dehydrogenase _quinone_ [Wolbachia endosymbiont of Culex quinquefasciatus Pel]	WP_038199409.1 monovalent cation/H+ antiporter subunit D [Wolbachia pipientis]	WP_026097249.1 monovalent cation/H+ antiporter subunit D [Wolbachia pipientis]	WP_047759480.1 monovalent cation/H+ antiporter subunit D [Wolbachia endosymbiont of Armadillidium vulgare]	wFol_03880 mrpD Monovalent cation/H+ antiporter subunit D 471346_472845 forward MW_55601	OCA06644.1 NADH-Ubiquinone/plastoquinone _complex I__ various chains family protein [Wolbachia endosymbiont of Trichogramma pretiosum]	wLcla07380 wLcla07380 NADH dehydrogenase _Quinone_ 679574_681022 forward MW_54208	ONI55797.1 NADH dehydrogenase [Wolbachia pipientis wUni], ONI55798.1 NADH dehydrogenase domain protein [Wolbachia pipientis wUni]	OEY87125.1 cation_proton antiporter [Wolbachia pipientis]		OG0000104	1	1	1	1	1	1	1	1	1	1	1	1	1	1	1	1	2	1		1.05556	0.235702		OG0000104	-0.235702	-0.235702	-0.235702	-0.235702	-0.235702	-0.235702
OG0000105	wOo_07740 wOo_07740 NADH dehydrogenase subunit B 692782_693288 reverse MW_18783	WP_014869120.1 MULTISPECIES_ NADH dehydrogenase [Wolbachia]	gi|58584500|ref|YP_198073.1| NADH_ubiquinone oxidoreductase chain B [Wolbachia endosymbiont strain TRS of Brugia malayi]	BAO99849.1 NADH dehydrogenase beta subunit [Wolbachia endosymbiont of Cimex lectularius]	CDR79273.1 NADH dehydrogenase subunit B_NADH-quinone oxidoreductase subunit B_NADH dehydrogenase subunit B_NADH_ubiquinone oxidoreductase 49 kD subunit 7_NADH-quinone oxidoreductase_ B subunit_NADH ubiquinone oxidoreductase_ 20 Kd subunit [Wolbachia]	AAS14776.1 NADH dehydrogenase I_ B subunit [Wolbachia endosymbiont of Drosophila melanogaster]	AGK00356.1 NADH-quinone oxidoreductase subunit B [Wolbachia endosymbiont of Drosophila simulans wHa]	ACN95974.1 NADH dehydrogenase I_ B subunit [Wolbachia sp. wRi]	AGJ99140.1 NADH-quinone oxidoreductase subunit B [Wolbachia endosymbiont of Drosophila simulans wNo]	CAQ54961.1 NADH dehydrogenase I_ B subunit [Wolbachia endosymbiont of Culex quinquefasciatus Pel]	WP_038199432.1 NADH-quinone oxidoreductase subunit B [Wolbachia pipientis]	WP_007302257.1 MULTISPECIES_ NADH-quinone oxidoreductase subunit B [Wolbachia]	WP_047759722.1 NADH-quinone oxidoreductase subunit B [Wolbachia endosymbiont of Armadillidium vulgare]	wFol_08420 nuoB NADH-quinone oxidoreductase subunit B 1002352_1002867 forward MW_19155	OCA06486.1 NADH-quinone oxidoreductase_ B subunit [Wolbachia endosymbiont of Trichogramma pretiosum]	wLcla06270 nuoB NADH-quinone oxidoreductase subunit B 580548_581051 reverse MW_18667	ONI55740.1 NADH-quinone oxidoreductase_ B subunit_ partial [Wolbachia pipientis wUni], ONI55784.1 NADH-quinone oxidoreductase_ B subunit [Wolbachia pipientis wUni]	OEY86923.1 NADH-quinone oxidoreductase subunit B [Wolbachia pipientis]		OG0000105	1	1	1	1	1	1	1	1	1	1	1	1	1	1	1	1	2	1		1.05556	0.235702		OG0000105	-0.235702	-0.235702	-0.235702	-0.235702	-0.235702	-0.235702
OG0000106	wOo_07750 wOo_07750 NADH ubiquinone oxidoreductase chain A 693293_693646 reverse MW_13507	WP_014869121.1 MULTISPECIES_ NADH_ubiquinone oxidoreductase subunit A [Wolbachia]	gi|58584499|ref|YP_198072.1| NADH_ubiquinone oxidoreductase chain A [Wolbachia endosymbiont strain TRS of Brugia malayi]	BAO99850.1 NADH dehydrogenase I A subunit [Wolbachia endosymbiont of Cimex lectularius]	CDR79274.1 NADH dehydrogenase I subunit A_NAD_P_H-quinone oxidoreductase subunit 3_NADH_ubiquinone oxidoreductase subunit A_NADH_ubiquinone oxidoreductase subunit 3 _chain A__NADH-ubiquinone/plastoquinone oxidoreductase_ chain 3 [Wolbachia]	AAS14777.1 NADH dehydrogenase I_ A subunit [Wolbachia endosymbiont of Drosophila melanogaster]	AGK00357.1 NADH-quinone oxidoreductase subunit A [Wolbachia endosymbiont of Drosophila simulans wHa]	ACN95975.1 NADH dehydrogenase I_ A subunit [Wolbachia sp. wRi]	AGJ99141.1 NADH-quinone oxidoreductase subunit A [Wolbachia endosymbiont of Drosophila simulans wNo]	CAQ54960.1 NADH dehydrogenase I_ A subunit [Wolbachia endosymbiont of Culex quinquefasciatus Pel]	WP_006279576.1 MULTISPECIES_ NADH-quinone oxidoreductase subunit A [Wolbachia]	WP_012481929.1 MULTISPECIES_ NADH-quinone oxidoreductase subunit A [Wolbachia]	WP_047759723.1 NADH_ubiquinone oxidoreductase subunit A [Wolbachia endosymbiont of Armadillidium vulgare]	wFol_08410 nuoA NADH-quinone oxidoreductase subunit A 1001994_1002347 forward MW_13390	OCA06487.1 NADH-ubiquinone/plastoquinone oxidoreductase_ chain 3 family protein [Wolbachia endosymbiont of Trichogramma pretiosum]	wLcla06280 nuoA NADH-quinone oxidoreductase subunit A 581042_581395 reverse MW_13426	ONI55739.1 NADH-quinone oxidoreductase chain 7 [Wolbachia pipientis wUni], ONI55785.1 NADH-quinone oxidoreductase chain 7 [Wolbachia pipientis wUni]	OEY86924.1 NADH-quinone oxidoreductase subunit A [Wolbachia pipientis]		OG0000106	1	1	1	1	1	1	1	1	1	1	1	1	1	1	1	1	2	1		1.05556	0.235702		OG0000106	-0.235702	-0.235702	-0.235702	-0.235702	-0.235702	-0.235702
OG0000107	wOo_07760 wOo_07760 HIT family hydrolase 693674_694042 reverse MW_14182	WP_025264080.1 hypothetical protein [Wolbachia endosymbiont of Onchocerca volvulus]	gi|58584498|ref|YP_198071.1| HIT family hydrolase [Wolbachia endosymbiont strain TRS of Brugia malayi]	BAO99851.1 HIT family hydrolase [Wolbachia endosymbiont of Cimex lectularius]	CDR79275.1 HIT family protein_HIT-like protein HI_0961_purine nucleoside phosphoramidase_HIT domain [Wolbachia]	AAS14778.1 HIT family protein [Wolbachia endosymbiont of Drosophila melanogaster]	AGK00358.1 HIT family protein [Wolbachia endosymbiont of Drosophila simulans wHa]	ACN95976.1 HIT family protein [Wolbachia sp. wRi]	AGJ99142.1 HIT family protein [Wolbachia endosymbiont of Drosophila simulans wNo]	CAQ54959.1 HIT family protein [Wolbachia endosymbiont of Culex quinquefasciatus Pel]	WP_010082356.1 MULTISPECIES_ hypothetical protein [Wolbachia]	WP_006014413.1 MULTISPECIES_ hypothetical protein [Wolbachia]	WP_047759724.1 hypothetical protein [Wolbachia endosymbiont of Armadillidium vulgare]	wFol_08400 wFol_08400 HIT family protein 1001614_1001973 forward MW_13607	OCA06488.1 HIT domain protein [Wolbachia endosymbiont of Trichogramma pretiosum]	wLcla06290 wLcla06290 HIT family protein 581413_581781 reverse MW_14012	ONI55738.1 HIT domain protein [Wolbachia pipientis wUni], ONI55786.1 HIT domain protein [Wolbachia pipientis wUni]	OEY86925.1 histidine triad nucleotide-binding protein [Wolbachia pipientis]		OG0000107	1	1	1	1	1	1	1	1	1	1	1	1	1	1	1	1	2	1		1.05556	0.235702		OG0000107	-0.235702	-0.235702	-0.235702	-0.235702	-0.235702	-0.235702
OG0000108	wOo_07770 wOo_07770 hypothetical protein 694046_694963 reverse MW_34402	WP_052317718.1 hypothetical protein [Wolbachia endosymbiont of Onchocerca volvulus]	gi|58584497|ref|YP_198070.1| hypothetical protein Wbm0239 [Wolbachia endosymbiont strain TRS of Brugia malayi]	BAO99852.1 putative uncharacterized protein [Wolbachia endosymbiont of Cimex lectularius]	CDR79277.1 hypothetical protein WPAU_0906 [Wolbachia]	AAS14780.1 hypothetical protein WD_1127 [Wolbachia endosymbiont of Drosophila melanogaster]	AGK00360.1 hypothetical protein wHa_09450 [Wolbachia endosymbiont of Drosophila simulans wHa]	ACN95978.1 hypothetical protein WRi_013000 [Wolbachia sp. wRi]	AGJ99144.1 hypothetical protein wNo_07480 [Wolbachia endosymbiont of Drosophila simulans wNo]	CAQ54957.1 hypothetical protein WP0849 [Wolbachia endosymbiont of Culex quinquefasciatus Pel]	WP_038199434.1 hypothetical protein [Wolbachia pipientis]	WP_007302253.1 MULTISPECIES_ hypothetical protein [Wolbachia]	WP_047759726.1 hypothetical protein [Wolbachia endosymbiont of Armadillidium vulgare]	wFol_08380 wFol_08380 Uncharacterized protein 1000064_1001224 forward MW_42222	OCA06490.1 hypothetical protein wTpre_824 [Wolbachia endosymbiont of Trichogramma pretiosum]	wLcla06310 wLcla06310 Uncharacterized protein 582073_582807 reverse MW_27943	ONI55736.1 hypothetical protein N500_1205 [Wolbachia pipientis wUni], ONI55788.1 hypothetical protein N500_1165_ partial [Wolbachia pipientis wUni]	OEY86926.1 hypothetical protein BIY23_00255 [Wolbachia pipientis]		OG0000108	1	1	1	1	1	1	1	1	1	1	1	1	1	1	1	1	2	1		1.05556	0.235702		OG0000108	-0.235702	-0.235702	-0.235702	-0.235702	-0.235702	-0.235702
OG0000109	wOo_08690 wOo_08690 hypothetical protein 786286_786795 forward MW_17943	WP_025264128.1 hypothetical protein [Wolbachia endosymbiont of Onchocerca volvulus]	gi|58584440|ref|YP_198013.1| hypothetical protein Wbm0180 [Wolbachia endosymbiont strain TRS of Brugia malayi]	BAO99402.1 putative uncharacterized protein [Wolbachia endosymbiont of Cimex lectularius]	CDR79289.1 hypothetical protein WPAU_0920 [Wolbachia]	AAS14652.1 hypothetical protein WD_0991 [Wolbachia endosymbiont of Drosophila melanogaster]	AGK00251.1 hypothetical protein wHa_08280 [Wolbachia endosymbiont of Drosophila simulans wHa]	ACN95655.1 hypothetical protein WRi_009390 [Wolbachia sp. wRi]	AGJ98478.1 hypothetical protein wNo_00170 [Wolbachia endosymbiont of Drosophila simulans wNo]	CAQ54127.1 hypothetical protein WP0018 [Wolbachia endosymbiont of Culex quinquefasciatus Pel], CAQ54222.1 hypothetical protein WP0114 [Wolbachia endosymbiont of Culex quinquefasciatus Pel]	WP_010082318.1 hypothetical protein_ partial [Wolbachia pipientis]	WP_019236985.1 hypothetical protein_ partial [Wolbachia pipientis]	WP_047759707.1 hypothetical protein [Wolbachia endosymbiont of Armadillidium vulgare]	wFol_07830 wFol_07830 Uncharacterized protein 937380_937883 forward MW_17073	OCA05919.1 hypothetical protein wTpre_237 [Wolbachia endosymbiont of Trichogramma pretiosum]	wLcla01910 wLcla01910 Uncharacterized protein 166524_167018 forward MW_17465	ONI56050.1 hypothetical protein N500_0882 [Wolbachia pipientis wUni]	OEY86513.1 hypothetical protein BIY23_03775 [Wolbachia pipientis]		OG0000109	1	1	1	1	1	1	1	1	1	2	1	1	1	1	1	1	1	1		1.05556	0.235702		OG0000109	-0.235702	-0.235702	-0.235702	-0.235702	-0.235702	-0.235702
OG0000110	wOo_08080 wOo_08080 NADH ubiquinone oxidoreductase chain L 721294_723150 reverse MW_69821	WP_025264099.1 NADH_ubiquinone oxidoreductase subunit L [Wolbachia endosymbiont of Onchocerca volvulus]	gi|58584880|ref|YP_198453.1| NADH_ubiquinone oxidoreductase chain L [Wolbachia endosymbiont strain TRS of Brugia malayi]	BAO99495.1 NADH dehydrogenase I L subunit [Wolbachia endosymbiont of Cimex lectularius]	CDR79312.1 NADH dehydrogenase I_ L subunit_NADH-quinone oxidoreductase subunit L_NADH_ubiquinone oxidoreductase subunit L_Multisubunit Na /H antiporter_ MnhB subunit_proton-translocating NADH-quinone oxidoreductase_ chain L_NADH-Ubiquinone/plastoquinone _complex I__ various chains [Wolbachia]	AAS14629.1 NADH dehydrogenase I_ L subunit [Wolbachia endosymbiont of Drosophila melanogaster]	AGK00232.1 NADH-quinone oxidoreductase subunit L [Wolbachia endosymbiont of Drosophila simulans wHa]	ACN95634.1 NADH dehydrogenase I_ L subunit [Wolbachia sp. wRi]	AGJ99097.1 NADH-quinone oxidoreductase subunit L [Wolbachia endosymbiont of Drosophila simulans wNo]	CAQ55103.1 NADH dehydrogenase I_ L subunit [Wolbachia endosymbiont of Culex quinquefasciatus Pel]	WP_022626390.1 MULTISPECIES_ NADH dehydrogenase I_ L subunit [Wolbachia]	WP_026097251.1 NADH_ubiquinone oxidoreductase subunit L [Wolbachia pipientis]	WP_047759467.1 NADH_ubiquinone oxidoreductase subunit L [Wolbachia endosymbiont of Armadillidium vulgare]	wFol_10830 nuoL NADH dehydrogenase I_ L subunit 1298763_1300619 reverse MW_69499	OCA06538.1 proton-translocating NADH-quinone oxidoreductase_ chain L family protein [Wolbachia endosymbiont of Trichogramma pretiosum]	wLcla08980 nuoL NADH dehydrogenase I_ L subunit 816341_818188 forward MW_69130	ONI56065.1 NADH-quinone oxidoreductase chain 12 [Wolbachia pipientis wUni], ONI56082.1 NADH-quinone oxidoreductase chain 12 domain protein_ partial [Wolbachia pipientis wUni]	OEY86625.1 NADH-quinone oxidoreductase subunit L [Wolbachia pipientis]		OG0000110	1	1	1	1	1	1	1	1	1	1	1	1	1	1	1	1	2	1		1.05556	0.235702		OG0000110	-0.235702	-0.235702	-0.235702	-0.235702	-0.235702	-0.235702
OG0000111	wOo_08090 wOo_08090 NADH ubiquinone oxidoreductase chain K 723155_723463 reverse MW_11179	WP_025264100.1 NADH-quinone oxidoreductase subunit K [Wolbachia endosymbiont of Onchocerca volvulus]	gi|58584881|ref|YP_198454.1| NADH_ubiquinone oxidoreductase chain K [Wolbachia endosymbiont strain TRS of Brugia malayi]	BAO99494.1 NADH dehydrogenase I K subunit [Wolbachia endosymbiont of Cimex lectularius]	CDR79313.1 NADH dehydrogenase I_ K subunit_NADH-quinone oxidoreductase subunit K_NADH_ubiquinone oxidoreductase subunit K_NADH-ubiquinone/plastoquinone oxidoreductase chain 4L [Wolbachia]	AAS14628.1 NADH dehydrogenase I_ K subunit [Wolbachia endosymbiont of Drosophila melanogaster]	AGK00231.1 NADH-quinone oxidoreductase subunit K [Wolbachia endosymbiont of Drosophila simulans wHa]	ACN95633.1 NADH dehydrogenase I_ K subunit [Wolbachia sp. wRi]	AGJ99096.1 NADH-quinone oxidoreductase subunit K [Wolbachia endosymbiont of Drosophila simulans wNo]	CAQ55102.1 NADH dehydrogenase I_ K subunit [Wolbachia endosymbiont of Culex quinquefasciatus Pel]	WP_038199248.1 NADH-quinone oxidoreductase subunit K [Wolbachia pipientis]	WP_019236815.1 MULTISPECIES_ NADH-quinone oxidoreductase [Wolbachia]	WP_047759466.1 NADH-quinone oxidoreductase subunit K [Wolbachia endosymbiont of Armadillidium vulgare]	wFol_10840 nuoK NADH dehydrogenase I_ K subunit 1300624_1300932 reverse MW_11156	OCA06539.1 NADH-ubiquinone/plastoquinone oxidoreductase chain 4L family protein [Wolbachia endosymbiont of Trichogramma pretiosum]	wLcla08970 nuoK NADH-quinone oxidoreductase subunit K 816028_816336 forward MW_11114	ONI56064.1 NADH-quinone oxidoreductase subunit K [Wolbachia pipientis wUni], ONI56081.1 NADH-quinone oxidoreductase subunit K [Wolbachia pipientis wUni]	OEY86624.1 NADH-quinone oxidoreductase subunit K [Wolbachia pipientis]		OG0000111	1	1	1	1	1	1	1	1	1	1	1	1	1	1	1	1	2	1		1.05556	0.235702		OG0000111	-0.235702	-0.235702	-0.235702	-0.235702	-0.235702	-0.235702
OG0000112	wOo_08100 wOo_08100 NADH ubiquinone oxidoreductase chain J 723454_724068 reverse MW_22804	WP_025264101.1 MULTISPECIES_ NADH-quinone oxidoreductase [Wolbachia]	gi|58584882|ref|YP_198455.1| NADH_ubiquinone oxidoreductase chain J [Wolbachia endosymbiont strain TRS of Brugia malayi]	BAO99493.1 NADH dehydrogenase I J subunit [Wolbachia endosymbiont of Cimex lectularius]	CDR79314.1 NADH dehydrogenase I_ J subunit_NADH-quinone oxidoreductase subunit J_NADH_ubiquinone oxidoreductase subunit J_NADH-ubiquinone/plastoquinone oxidoreductase chain 6 [Wolbachia]	AAS14627.1 NADH dehydrogenase I_ J subunit [Wolbachia endosymbiont of Drosophila melanogaster]	AGK00230.1 NADH-quinone oxidoreductase subunit J [Wolbachia endosymbiont of Drosophila simulans wHa]	ACN95632.1 NADH dehydrogenase I_ J subunit [Wolbachia sp. wRi]	AGJ99095.1 NADH-quinone oxidoreductase subunit J [Wolbachia endosymbiont of Drosophila simulans wNo]	CAQ55101.1 NADH dehydrogenase I_ J subunit [Wolbachia endosymbiont of Culex quinquefasciatus Pel]	WP_010962952.1 MULTISPECIES_ NADH-quinone oxidoreductase [Wolbachia]	WP_026097252.1 NADH-quinone oxidoreductase [Wolbachia pipientis]	WP_047759465.1 NADH-quinone oxidoreductase [Wolbachia endosymbiont of Armadillidium vulgare]	wFol_10850 nuoJ NADH dehydrogenase I_ J subunit 1300923_1301510 reverse MW_21749	OCA06540.1 NADH-ubiquinone/plastoquinone oxidoreductase chain 6 family protein [Wolbachia endosymbiont of Trichogramma pretiosum]	wLcla08960 nuoJ NADH dehydrogenase I_ J subunit 815450_816037 forward MW_21884	ONI56063.1 NADH-quinone oxidoreductase subunit J [Wolbachia pipientis wUni], ONI56080.1 NADH-quinone oxidoreductase subunit J [Wolbachia pipientis wUni]	OEY86623.1 NADH-quinone oxidoreductase [Wolbachia pipientis]		OG0000112	1	1	1	1	1	1	1	1	1	1	1	1	1	1	1	1	2	1		1.05556	0.235702		OG0000112	-0.235702	-0.235702	-0.235702	-0.235702	-0.235702	-0.235702
OG0000113	wOo_10180 wOo_10180 integral membrane protein interacts with FtsH 924747_925469 forward MW_27013	WP_025264191.1 membrane protein [Wolbachia endosymbiont of Onchocerca volvulus]	gi|58584747|ref|YP_198320.1| Integral membrane protein_ interacts with FtsH [Wolbachia endosymbiont strain TRS of Brugia malayi]	BAO99622.1 putative membrane protein [Wolbachia endosymbiont of Cimex lectularius]	CDR79329.1 integral membrane protein_ interacts with FtsH_Inner membrane protein YbhL_Inhibitor of apoptosis-promoting Bax1 [Wolbachia]	AAS14615.1 membrane protein_ putative [Wolbachia endosymbiont of Drosophila melanogaster]	AGK00220.1 BAX inhibitor domain protein [Wolbachia endosymbiont of Drosophila simulans wHa]	ACN95620.1 hypothetical protein WRi_008910 [Wolbachia sp. wRi]	AGJ98901.1 putative bax inhibitor _bi_-1 like protein [Wolbachia endosymbiont of Drosophila simulans wNo]	CAQ54928.1 Putative membrane protein [Wolbachia endosymbiont of Culex quinquefasciatus Pel]	WP_010962942.1 MULTISPECIES_ membrane protein [Wolbachia]	WP_007302228.1 MULTISPECIES_ membrane protein [Wolbachia]	WP_047759216.1 membrane protein [Wolbachia endosymbiont of Armadillidium vulgare]	wFol_14020 wFol_14020 BAX inhibitor domain protein 1673791_1674504 reverse MW_26376	OCA06607.1 inhibitor of apoptosis-promoting Bax1 family protein [Wolbachia endosymbiont of Trichogramma pretiosum]	wLcla07090 wLcla07090 Putative bax inhibitor _Bi_-1 like protein 653519_654241 reverse MW_26958	ONI56090.1 hypothetical protein N500_0835 [Wolbachia pipientis wUni]	OEY86440.1 hypothetical protein BIY23_03935 [Wolbachia pipientis], OEY87025.1 hypothetical protein BIY23_00865 [Wolbachia pipientis]		OG0000113	1	1	1	1	1	1	1	1	1	1	1	1	1	1	1	1	1	2		1.05556	0.235702		OG0000113	-0.235702	-0.235702	-0.235702	-0.235702	-0.235702	-0.235702
OG0000114	wOo_04430 wOo_04430 glycineserine hydroxymethyltransferase 380050_381327 forward MW_46778	WP_025263925.1 serine hydroxymethyltransferase [Wolbachia endosymbiont of Onchocerca volvulus]	gi|58584266|ref|YP_197839.1| Glycine/serine hydroxymethyltransferase [Wolbachia endosymbiont strain TRS of Brugia malayi]	BAO99940.1 glycine/serine hydroxymethyltransferase [Wolbachia endosymbiont of Cimex lectularius]	CDR79457.1 serine hydroxymethyltransferase_Pyridoxal-phosphate-dependent serine hydroxymethyltransferase 2_serine hydroxymethyltransferase_7-keto-8-aminopelargonate synthetase and related enzymes_8-amino-7-oxononanoate synthase_Serine hydroxymethyltransferase [Wolbachia]	AAS14693.1 serine hydroxymethyltransferase [Wolbachia endosymbiont of Drosophila melanogaster]	AGK00287.1 Serine hydroxymethyltransferase [Wolbachia endosymbiont of Drosophila simulans wHa]	ACN95769.1 Glycine/serine hydroxymethyltransferase [Wolbachia sp. wRi]	AGJ98917.1 Serine hydroxymethyltransferase [Wolbachia endosymbiont of Drosophila simulans wNo]	CAQ54944.1 serine hydroxymethyltransferase [Wolbachia endosymbiont of Culex quinquefasciatus Pel]	WP_038199306.1 serine hydroxymethyltransferase [Wolbachia pipientis]	WP_007302243.1 MULTISPECIES_ serine hydroxymethyltransferase [Wolbachia]	WP_047759614.1 serine hydroxymethyltransferase [Wolbachia endosymbiont of Armadillidium vulgare]	wFol_12200 glyA Serine hydroxymethyltransferase 1436544_1437833 reverse MW_46951	OCA06628.1 serine hydroxymethyltransferase family protein [Wolbachia endosymbiont of Trichogramma pretiosum]	wLcla07260 glyA Serine hydroxymethyltransferase 669620_670897 reverse MW_46496	ONI56018.1 serine hydroxymethyltransferase [Wolbachia pipientis wUni]	OEY86469.1 serine hydroxymethyltransferase [Wolbachia pipientis], OEY86634.1 hypothetical protein BIY23_02940 [Wolbachia pipientis]		OG0000114	1	1	1	1	1	1	1	1	1	1	1	1	1	1	1	1	1	2		1.05556	0.235702		OG0000114	-0.235702	-0.235702	-0.235702	-0.235702	-0.235702	-0.235702
OG0000115	wOo_03490 wOo_03490 phosphoribosylaminoimidazole carboxylase NCAIR sy nthetase- 295022_296083 forward MW_40036	WP_014868861.1 MULTISPECIES_ 5-_carboxyamino_imidazole ribonucleotide synthase [Wolbachia]	gi|58584302|ref|YP_197875.1| Phosphoribosylaminoimidazole carboxylase _NCAIR synthetase_ [Wolbachia endosymbiont strain TRS of Brugia malayi]	BAO99941.1 hypothetical protein WCLE_006390 [Wolbachia endosymbiont of Cimex lectularius], BAP00150.1 phosphoribosylaminoimidazole carboxylase ATPase subunit [Wolbachia endosymbiont of Cimex lectularius]	CDR79503.1 phosphoribosylaminoimidazole carboxylase_ ATPase subunit_N5-carboxyaminoimidazole ribonucleotide synthase_phosphoribosylaminoimidazole carboxylase ATPase subunit_Phosphoribosylaminoimidazole carboxylase _NCAIR synthetase__phosphoribosylaminoimidazole carboxylase_ ATPase subunit_ATP-grasp domain [Wolbachia]	AAS14793.1 phosphoribosylaminoimidazole carboxylase_ ATPase subunit [Wolbachia endosymbiont of Drosophila melanogaster]	AGK00370.1 Phosphoribosylaminoimidazole carboxylase_ ATPase subunit [Wolbachia endosymbiont of Drosophila simulans wHa]	ACN95703.1 phosphoribosylaminoimidazole carboxylase_ ATPase subunit [Wolbachia sp. wRi]	AGJ98810.1 Phosphoribosylaminoimidazole carboxylase_ ATPase subunit [Wolbachia endosymbiont of Drosophila simulans wNo]	CAQ54827.1 phosphoribosylaminoimidazole carboxylase_ ATPase subunit [Wolbachia endosymbiont of Culex quinquefasciatus Pel]	WP_010082017.1 5-_carboxyamino_imidazole ribonucleotide synthase [Wolbachia pipientis]	WP_019236730.1 5-_carboxyamino_imidazole ribonucleotide synthase [Wolbachia pipientis]	WP_047758859.1 phosphoribosylaminoimidazole carboxylase [Wolbachia endosymbiont of Armadillidium vulgare]	wFol_03930 purK N5-carboxyaminoimidazole ribonucleotide synthase 478578_479807 reverse MW_46080	OCA06825.1 phosphoribosylaminoimidazole carboxylase_ ATPase subunit [Wolbachia endosymbiont of Trichogramma pretiosum]	wLcla09690 purK N5-carboxyaminoimidazole ribonucleotide synthase 882221_883297 forward MW_40064	ONI55982.1 phosphoribosylaminoimidazole carboxylase ATPase subunit [Wolbachia pipientis wUni]	OEY86891.1 5-_carboxyamino_imidazole ribonucleotide synthase [Wolbachia pipientis]		OG0000115	1	1	1	2	1	1	1	1	1	1	1	1	1	1	1	1	1	1		1.05556	0.235702		OG0000115	-0.235702	-0.235702	-0.235702	4.00694	-0.235702	-0.235702
OG0000116	wOo_09410 wOo_09410 DNA replication initiation ATPase 847916_848569 reverse MW_25319	WP_025264154.1 chorismate synthase [Wolbachia endosymbiont of Onchocerca volvulus]	gi|58584988|ref|YP_198561.1| Possible ATPase involved in DNA replication initiation_ DnaA paralog [Wolbachia endosymbiont strain TRS of Brugia malayi]	BAO99353.1 chromosomal DNA replication initiator-related protein [Wolbachia endosymbiont of Cimex lectularius]	CDR79506.1 chromosomal DNA replication initiator-like protein_Chromosomal replication initiator protein DnaA_hypothetical protein_DnaA regulatory inactivator Hda_Bacterial dnaA protein [Wolbachia]	AAS14796.1 chromosomal DNA replication initiator-related protein [Wolbachia endosymbiont of Drosophila melanogaster]	AGK00373.1 Chromosomal DNA replication initiator-related protein [Wolbachia endosymbiont of Drosophila simulans wHa]	ACN95699.1 chromosomal DNA replication initiator-related protein [Wolbachia sp. wRi]	AGJ99080.1 Chromosomal DNA replication initiator-related protein [Wolbachia endosymbiont of Drosophila simulans wNo]	CAQ55086.1 chromosomal DNA replication initiator-related protein [Wolbachia endosymbiont of Culex quinquefasciatus Pel]	WP_006280257.1 MULTISPECIES_ chromosomal DNA replication initiator DnaA [Wolbachia]	WP_007302365.1 MULTISPECIES_ chromosomal DNA replication initiator DnaA [Wolbachia]	WP_047759813.1 chorismate synthase [Wolbachia endosymbiont of Armadillidium vulgare]	wFol_04310 wFol_04310 Chromosomal DNA replication initiator-related protein 527771_528400 reverse MW_24426	OCA06786.1 bacterial dnaA family protein [Wolbachia endosymbiont of Trichogramma pretiosum]	wLcla08780 wLcla08780 Chromosomal DNA replication initiator-related protein 800217_800852 forward MW_24616	ONI56000.1 hypothetical protein N500_0935 [Wolbachia pipientis wUni]	OEY87162.1 hypothetical protein BIY23_01650 [Wolbachia pipientis], OEY87207.1 chorismate synthase [Wolbachia pipientis]		OG0000116	1	1	1	1	1	1	1	1	1	1	1	1	1	1	1	1	1	2		1.05556	0.235702		OG0000116	-0.235702	-0.235702	-0.235702	-0.235702	-0.235702	-0.235702
OG0000117	wOo_06470 wOo_06470 glutamate-cysteine ligase 582058_583218 forward MW_44438	WP_025264020.1 glutamate--cysteine ligase [Wolbachia endosymbiont of Onchocerca volvulus]	gi|58584978|ref|YP_198551.1| Glutamate-cysteine ligase [Wolbachia endosymbiont strain TRS of Brugia malayi]	BAO99409.1 glutamate-cysteine ligase [Wolbachia endosymbiont of Cimex lectularius]	CDR79544.1 glutamate--cysteine ligase-related protein_Uncharacterized protein involved in benzoate metabolism_glutamate--cysteine ligase_Glutamate-cysteine ligase [Wolbachia]	AAS14834.1 glutamate--cysteine ligase-related protein [Wolbachia endosymbiont of Drosophila melanogaster]	AGK00402.1 Glutamate-cysteine ligase [Wolbachia endosymbiont of Drosophila simulans wHa]	ACN95854.1 glutamate--cysteine ligase-related protein [Wolbachia sp. wRi]	AGJ98841.1 Glutamate--cysteine ligase protein [Wolbachia endosymbiont of Drosophila simulans wNo]	CAQ54861.1 glutamate--cysteine ligase-related protein [Wolbachia endosymbiont of Culex quinquefasciatus Pel]	WP_038199561.1 glutamate--cysteine ligase [Wolbachia pipientis]	WP_019236751.1 glutamate--cysteine ligase [Wolbachia pipientis]	WP_047759760.1 glutamate--cysteine ligase [Wolbachia endosymbiont of Armadillidium vulgare]	wFol_03750 wFol_03750 Glutamate-cysteine ligase 453557_454714 forward MW_43987	OCA06865.1 glutamate--cysteine ligase [Wolbachia endosymbiont of Trichogramma pretiosum]	wLcla10030 wLcla10030 Glutamate--cysteine ligase 913313_914467 reverse MW_43928	ONI55872.1 glutamate-cysteine ligase domain protein [Wolbachia pipientis wUni], ONI55873.1 glutamate--cysteine ligase [Wolbachia pipientis wUni]	OEY86628.1 hypothetical protein BIY23_02910 [Wolbachia pipientis]		OG0000117	1	1	1	1	1	1	1	1	1	1	1	1	1	1	1	1	2	1		1.05556	0.235702		OG0000117	-0.235702	-0.235702	-0.235702	-0.235702	-0.235702	-0.235702
OG0000118	wOo_05130 wOo_05130 primosomal protein N' 441223_443472 forward MW_84976	WP_025263957.1 primosomal protein N' [Wolbachia endosymbiont of Onchocerca volvulus]	gi|58585002|ref|YP_198575.1| Primosomal protein N'_ superfamily II helicase_ PriA [Wolbachia endosymbiont strain TRS of Brugia malayi]	BAO99837.1 primosomal protein N [Wolbachia endosymbiont of Cimex lectularius]	CDR79555.1 primosomal protein N_Primosomal protein N'_primosome assembly protein PriA_ATP-dependent protease HslVU _ClpYQ__ peptidase subunit_primosomal protein N'_DEAD/DEAH box helicase [Wolbachia]	AAS14846.1 primosomal protein N [Wolbachia endosymbiont of Drosophila melanogaster], AAS14920.1 hypothetical protein WD_1276 [Wolbachia endosymbiont of Drosophila melanogaster]	AGK00413.1 Primosomal protein N'_ superfamily II helicase [Wolbachia endosymbiont of Drosophila simulans wHa]	ACN95867.1 Primosomal protein N'_ superfamily II helicase [Wolbachia sp. wRi]	AGJ98853.1 Primosomal protein N'_ superfamily II helicase_ PriA [Wolbachia endosymbiont of Drosophila simulans wNo]	CAQ54874.1 primosomal protein N [Wolbachia endosymbiont of Culex quinquefasciatus Pel]	WP_038199572.1 primosomal protein N' [Wolbachia pipientis]		WP_047759750.1 primosomal protein N' [Wolbachia endosymbiont of Armadillidium vulgare]	wFol_13530 priA Primosomal protein N' 1603527_1605929 reverse MW_89841	OCA06582.1 primosomal protein N' [Wolbachia endosymbiont of Trichogramma pretiosum]	wLcla06910 priA Primosomal protein N' 634626_636980 reverse MW_88313	ONI55887.1 primosomal protein N' [Wolbachia pipientis wUni], ONI55888.1 primosomal protein N' domain protein [Wolbachia pipientis wUni]	OEY87137.1 primosomal protein N' [Wolbachia pipientis]		OG0000118	1	1	1	1	1	2	1	1	1	1	1	0	1	1	1	1	2	1		1.05556	0.416176		OG0000118	-0.13349	-0.13349	-0.13349	-0.13349	-0.13349	2.26934
OG0000119	wOo_05930 wOo_05930 signal transduction histidine kinase and receiver 523920_526400 reverse MW_93890	WP_025263995.1 hybrid sensor histidine kinase/response regulator [Wolbachia endosymbiont of Onchocerca volvulus]	gi|58584967|ref|YP_198540.1| Membrane associated signal transduction histidine kinase and receiver domain [Wolbachia endosymbiont strain TRS of Brugia malayi]	BAO99333.1 membrane associated signal transduction histidine kinase and receiver domain [Wolbachia endosymbiont of Cimex lectularius]	CDR79569.1 sensor histidine kinase/response regulator_Blue-light-activated protein_histidine kinase_Signal transduction histidine kinase_ nitrogen specific_TMAO reductase sytem sensor TorS_Histidine kinase-_ DNA gyrase B-_ and HSP90-like ATPase [Wolbachia]	AAS14861.1 hypothetical protein WD_1215 [Wolbachia endosymbiont of Drosophila melanogaster], AAS14862.1 sensor histidine kinase/response regulator [Wolbachia endosymbiont of Drosophila melanogaster]	AGK00427.1 Sensor histidine kinase/response regulator [Wolbachia endosymbiont of Drosophila simulans wHa]	ACN95881.1 sensor histidine kinase/response regulator [Wolbachia sp. wRi]	AGJ98979.1 Sensor histidine kinase/response regulator [Wolbachia endosymbiont of Drosophila simulans wNo]	CAQ55074.1 membrane associated signal transduction histidine kinase and receiver domain [Wolbachia endosymbiont of Culex quinquefasciatus Pel]	WP_038199586.1 hybrid sensor histidine kinase/response regulator [Wolbachia pipientis]	WP_007302355.1 MULTISPECIES_ hybrid sensor histidine kinase/response regulator [Wolbachia]	WP_047758988.1 histidine kinase [Wolbachia endosymbiont of Armadillidium vulgare]	wFol_01100 wFol_01100 Sensor histidine kinase/response regulator 147296_149764 forward MW_93024	OCA06779.1 sensory box protein [Wolbachia endosymbiont of Trichogramma pretiosum]	wLcla08710 wLcla08710 Hybrid sensor histidine kinase/response regulator 792763_795243 forward MW_93448	ONI55905.1 his Kinase A domain protein [Wolbachia pipientis wUni]	OEY87200.1 hybrid sensor histidine kinase/response regulator [Wolbachia pipientis]		OG0000119	1	1	1	1	1	2	1	1	1	1	1	1	1	1	1	1	1	1		1.05556	0.235702		OG0000119	-0.235702	-0.235702	-0.235702	-0.235702	-0.235702	4.00694
OG0000120	wOo_10100 wOo_10100 hypothetical protein 918445_919692 reverse MW_48443	WP_025264185.1 hypothetical protein [Wolbachia endosymbiont of Onchocerca volvulus]	gi|58584741|ref|YP_198314.1| hypothetical protein Wbm0484 [Wolbachia endosymbiont strain TRS of Brugia malayi]	BAO99666.1 putative uncharacterized protein [Wolbachia endosymbiont of Cimex lectularius]	CDR79576.1 hypothetical protein WPAU_1223 [Wolbachia]	AAS14869.1 hypothetical protein WD_1223 [Wolbachia endosymbiont of Drosophila melanogaster]	AGK00433.1 hypothetical protein wHa_10220 [Wolbachia endosymbiont of Drosophila simulans wHa]	ACN95887.1 hypothetical protein WRi_012020 [Wolbachia sp. wRi]	AGJ99039.1 hypothetical protein wNo_06280 [Wolbachia endosymbiont of Drosophila simulans wNo]	CAQ55178.1 hypothetical protein WP1070 [Wolbachia endosymbiont of Culex quinquefasciatus Pel]	WP_038199592.1 hypothetical protein [Wolbachia pipientis]	WP_010082038.1 hypothetical protein [Wolbachia pipientis]	WP_047759434.1 hypothetical protein [Wolbachia endosymbiont of Armadillidium vulgare]	wFol_13140 wFol_13140 Putative membrane protein 1562481_1563713 reverse MW_46527	OCA06413.1 hypothetical protein wTpre_746 [Wolbachia endosymbiont of Trichogramma pretiosum]	wLcla05930 wLcla05930 Uncharacterized protein 554874_556121 reverse MW_47601	ONI55845.1 hypothetical protein N500_1077_ partial [Wolbachia pipientis wUni], ONI55912.1 hypothetical protein N500_1076_ partial [Wolbachia pipientis wUni]	OEY86649.1 hypothetical protein BIY23_03040 [Wolbachia pipientis]		OG0000120	1	1	1	1	1	1	1	1	1	1	1	1	1	1	1	1	2	1		1.05556	0.235702		OG0000120	-0.235702	-0.235702	-0.235702	-0.235702	-0.235702	-0.235702
OG0000121	wOo_00230 wOo_00230 inorganic pyrophosphatase 15247_15753 reverse MW_18534	WP_014868687.1 MULTISPECIES_ inorganic pyrophosphatase [Wolbachia]	gi|58584840|ref|YP_198413.1| Inorganic pyrophosphatase [Wolbachia endosymbiont strain TRS of Brugia malayi]	BAP00388.1 inorganic pyrophosphatase [Wolbachia endosymbiont of Cimex lectularius]	CDR79611.1 inorganic pyrophosphatase_Inorganic pyrophosphatase_inorganic pyrophosphatase_Inorganic pyrophosphatase_Inorganic pyrophosphatase [Wolbachia]	AAS14908.1 inorganic pyrophosphatase [Wolbachia endosymbiont of Drosophila melanogaster]	AGK00463.1 Inorganic pyrophosphatase [Wolbachia endosymbiont of Drosophila simulans wHa]	ACN95919.1 inorganic pyrophosphatase [Wolbachia sp. wRi]	AGJ98885.1 Inorganic pyrophosphatase [Wolbachia endosymbiont of Drosophila simulans wNo]	CAQ54910.1 inorganic pyrophosphatase [Wolbachia endosymbiont of Culex quinquefasciatus Pel]	WP_010082061.1 MULTISPECIES_ inorganic pyrophosphatase [Wolbachia]	WP_019236780.1 inorganic pyrophosphatase [Wolbachia pipientis]	WP_047758748.1 inorganic pyrophosphatase [Wolbachia endosymbiont of Armadillidium vulgare], WP_047759151.1 inorganic pyrophosphatase [Wolbachia endosymbiont of Armadillidium vulgare]	wFol_13040 ppa Inorganic pyrophosphatase 1548761_1549261 reverse MW_18518	OCA06443.1 inorganic pyrophosphatase [Wolbachia endosymbiont of Trichogramma pretiosum]	wLcla09320 ppa Inorganic pyrophosphatase 843355_843861 reverse MW_18748	ONI55828.1 inorganic pyrophosphatase [Wolbachia pipientis wUni]	OEY87191.1 inorganic pyrophosphatase [Wolbachia pipientis]		OG0000121	1	1	1	1	1	1	1	1	1	1	1	1	2	1	1	1	1	1		1.05556	0.235702		OG0000121	-0.235702	-0.235702	-0.235702	-0.235702	-0.235702	-0.235702
OG0000122			gi|58584396|ref|YP_197969.1| hypothetical protein Wbm0136 [Wolbachia endosymbiont strain TRS of Brugia malayi]						AGJ98860.1 Ankyrin repeat domain protein [Wolbachia endosymbiont of Drosophila simulans wNo], AGJ98861.1 hypothetical protein wNo_04340 [Wolbachia endosymbiont of Drosophila simulans wNo], AGJ98862.1 Ankyrin repeat domain protein [Wolbachia endosymbiont of Drosophila simulans wNo]	CAQ54881.1 hypothetical protein WP0773 [Wolbachia endosymbiont of Culex quinquefasciatus Pel], CAQ54882.1 ankyrin repeat domain protein [Wolbachia endosymbiont of Culex quinquefasciatus Pel], CAQ54883.1 hypothetical protein WP0775 [Wolbachia endosymbiont of Culex quinquefasciatus Pel], CAQ54884.1 Ankyrin repeat domain protein [Wolbachia endosymbiont of Culex quinquefasciatus Pel]		WP_019236764.1 hypothetical protein [Wolbachia pipientis], WP_019236765.1 hypothetical protein [Wolbachia pipientis]	WP_047759845.1 hypothetical protein_ partial [Wolbachia endosymbiont of Armadillidium vulgare]	wFol_00880 wFol_00880 Uncharacterized protein 120846_121757 forward MW_34389	OCA06563.1 ankyrin repeat domain protein [Wolbachia endosymbiont of Trichogramma pretiosum], OCA06565.1 ankyrin repeat family protein [Wolbachia endosymbiont of Trichogramma pretiosum], OCA06566.1 ankyrin repeat domain protein [Wolbachia endosymbiont of Trichogramma pretiosum], OCA06568.1 ankyrin repeat domain protein [Wolbachia endosymbiont of Trichogramma pretiosum]	wLcla01580 wLcla01580 Zeta toxin and ankyrin repeat domain protein 134847_137801 forward MW_113432, wLcla06870 wLcla06870 Putative membrane protein 632279_633382 reverse MW_39654, wLcla08380 wLcla08380 Ankyrin repeat domain protein 765301_768579 forward MW_121564				OG0000122	0	0	1	0	0	0	0	0	3	4	0	2	1	1	4	3	0	0		1.05556	1.47418		OG0000122	-0.71603	-0.71603	-0.0376858	-0.71603	-0.71603	-0.71603
OG0000123	wOo_07270 wOo_07270 Type IV secretory pathway component VirB8 657018_657701 reverse MW_27014	WP_025264062.1 hypothetical protein [Wolbachia endosymbiont of Onchocerca volvulus]	gi|58584537|ref|YP_198110.1| Type IV secretory pathway_ component VirB8 [Wolbachia endosymbiont strain TRS of Brugia malayi]	BAO99325.1 type IV secretory pathway component VirB8 [Wolbachia endosymbiont of Cimex lectularius]	CDR78406.1 type IV secretion system protein VirB8_Type IV secretion system protein virB8_Type IV secretory pathway_ TrbF components_VirB8 protein [Wolbachia]	AAS13772.1 type IV secretion system protein VirB8 [Wolbachia endosymbiont of Drosophila melanogaster]	AGJ99505.1 Type IV secretion system protein VirB8 [Wolbachia endosymbiont of Drosophila simulans wHa]	ACN94876.1 type IV secretion system protein VirB8 [Wolbachia sp. wRi]	AGJ99438.1 Type IV secretion system protein VirB8 [Wolbachia endosymbiont of Drosophila simulans wNo]	CAQ55363.1 type IV secretion system protein VirB8 [Wolbachia endosymbiont of Culex quinquefasciatus Pel]	WP_010082650.1 hypothetical protein [Wolbachia pipientis]	WP_007302609.1 MULTISPECIES_ hypothetical protein [Wolbachia]	WP_047759309.1 Type IV secretion system protein VirB8 [Wolbachia endosymbiont of Armadillidium vulgare]	wFol_01910 virB8 Type IV secretion system protein VirB8 216914_217597 forward MW_26744	OCA05975.1 virB8 family protein [Wolbachia endosymbiont of Trichogramma pretiosum]	wLcla02620 virB8 Vir-like protein B8 231149_231829 forward MW_26330	ONI56896.1 virB8 [Wolbachia pipientis wUni]	OEY86823.1 type IV secretion system protein VirB8 [Wolbachia pipientis]		OG0000123	1	1	1	1	1	1	1	1	1	1	1	1	1	1	1	1	1	1		1	0		OG0000123	#DIV/0!	#DIV/0!	#DIV/0!	#DIV/0!	#DIV/0!	#DIV/0!
OG0000124	wOo_07260 wOo_07260 Type IV secretory pathway component VirB9 656225_657031 reverse MW_31321	WP_052307037.1 MULTISPECIES_ P-type conjugative transfer protein VirB9 [Wolbachia]	gi|58584538|ref|YP_198111.1| Type IV secretory pathway_ component VirB9 [Wolbachia endosymbiont strain TRS of Brugia malayi]	BAO99326.1 type IV secretory pathway component VirB9 [Wolbachia endosymbiont of Cimex lectularius]	CDR78407.1 type IV secretion system protein VirB9_Type IV secretion system protein virB9 precursor_type IV secretion system protein VirB9_Type IV secretory pathway_ VirB9 components_P-type conjugative transfer protein VirB9_Conjugal transfer protein [Wolbachia]	AAS13773.1 type IV secretion system protein VirB9 [Wolbachia endosymbiont of Drosophila melanogaster]	AGJ99506.1 Type IV secretion system protein VirB9 [Wolbachia endosymbiont of Drosophila simulans wHa]	ACN94877.1 type IV secretion system protein VirB9 [Wolbachia sp. wRi]	AGJ99439.1 Type IV secretion system protein VirB9 [Wolbachia endosymbiont of Drosophila simulans wNo]	CAQ55364.1 type IV secretion system protein VirB9 [Wolbachia endosymbiont of Culex quinquefasciatus Pel]	WP_038198545.1 P-type conjugative transfer protein VirB9 [Wolbachia pipientis]	WP_006012534.1 MULTISPECIES_ P-type conjugative transfer protein VirB9 [Wolbachia]	WP_047759343.1 type VI secretion protein [Wolbachia endosymbiont of Armadillidium vulgare]	wFol_01920 virB9 Type IV secretion system protein VirB9 217584_218393 forward MW_31663	OCA05976.1 P-type conjugative transfer protein VirB9 [Wolbachia endosymbiont of Trichogramma pretiosum]	wLcla02630 virB9 VirB9 231816_232619 forward MW_31053	ONI56897.1 P-type conjugative transfer protein VirB9 [Wolbachia pipientis wUni]	OEY86822.1 P-type conjugative transfer protein VirB9 [Wolbachia pipientis]		OG0000124	1	1	1	1	1	1	1	1	1	1	1	1	1	1	1	1	1	1		1	0		OG0000124	#DIV/0!	#DIV/0!	#DIV/0!	#DIV/0!	#DIV/0!	#DIV/0!
OG0000125	wOo_07240 wOo_07240 Type IV secretory pathway VirB11 component 653726_654718 reverse MW_37041	WP_025264060.1 type IV secretion system ATPase VirB11 [Wolbachia endosymbiont of Onchocerca volvulus]	gi|58584540|ref|YP_198113.1| Type IV secretory pathway_ VirB11 component [Wolbachia endosymbiont strain TRS of Brugia malayi]	BAO99328.1 type IV secretion system protein VirB11 [Wolbachia endosymbiont of Cimex lectularius]	CDR78409.1 type IV secretion system ATPase VirB11_Type IV secretion system protein virB11_type IV secretion system ATPase VirB11_Flp pilus assembly protein_ ATPase CpaF_P-type DNA transfer ATPase VirB11_Type II/IV secretion system protein [Wolbachia]	AAS13775.1 type IV secretion system protein VirB11 [Wolbachia endosymbiont of Drosophila melanogaster]	AGJ99508.1 Type IV secretion system protein VirB11 [Wolbachia endosymbiont of Drosophila simulans wHa]	ACN94879.1 type IV secretion system protein VirB11 [Wolbachia sp. wRi]	AGJ99441.1 Type IV secretion system protein VirB11 [Wolbachia endosymbiont of Drosophila simulans wNo]	CAQ55366.1 type IV secretion system protein VirB11 [Wolbachia endosymbiont of Culex quinquefasciatus Pel]	WP_038198493.1 type IV secretion system ATPase VirB11 [Wolbachia pipientis]	WP_019236952.1 MULTISPECIES_ type VI secretion protein [Wolbachia]	WP_047759307.1 type IV secretion system ATPase VirB11 [Wolbachia endosymbiont of Armadillidium vulgare]	wFol_01940 virB11 Type IV secretion system protein VirB11 219911_220903 forward MW_36661	OCA05978.1 P-type DNA transfer ATPase VirB11 [Wolbachia endosymbiont of Trichogramma pretiosum]	wLcla02650 virB11 Component of a type IV secretion system 234149_235141 forward MW_36668	ONI56899.1 P-type DNA transfer ATPase VirB11 [Wolbachia pipientis wUni]	OEY86821.1 P-type DNA transfer ATPase VirB11 [Wolbachia pipientis]		OG0000125	1	1	1	1	1	1	1	1	1	1	1	1	1	1	1	1	1	1		1	0		OG0000125	#DIV/0!	#DIV/0!	#DIV/0!	#DIV/0!	#DIV/0!	#DIV/0!
OG0000126	wOo_07230 wOo_07230 Type IV secretory pathway VirD4 component 651659_653698 reverse MW_78127	WP_025264059.1 type IV secretion system protein VirD4 [Wolbachia endosymbiont of Onchocerca volvulus]	gi|58584541|ref|YP_198114.1| Type IV secretory pathway_ VirD4 component [Wolbachia endosymbiont strain TRS of Brugia malayi]	BAO99329.1 type IV secretion system protein VirD4 [Wolbachia endosymbiont of Cimex lectularius]	CDR78410.1 type IV secretion system protein VirB8_Conjugal transfer protein traG_type IV secretion system component VirD4_Type IV secretory pathway_ VirD4 components_Ti-type conjugative transfer system protein TraG_Type IV secretory system Conjugative DNA transfer [Wolbachia]	AAS13776.1 type IV secretion system protein VirD4 [Wolbachia endosymbiont of Drosophila melanogaster]	AGJ99509.1 Type IV secretion system protein VirD4 [Wolbachia endosymbiont of Drosophila simulans wHa]	ACN94880.1 type IV secretion system protein VirD4 [Wolbachia sp. wRi]	AGJ99442.1 Type IV secretion system protein VirD4 [Wolbachia endosymbiont of Drosophila simulans wNo]	CAQ55367.1 type IV secretion system protein VirD4 [Wolbachia endosymbiont of Culex quinquefasciatus Pel]	WP_038198495.1 type IV secretion system protein VirD4 [Wolbachia pipientis]	WP_019236953.1 primase [Wolbachia pipientis]	WP_047759306.1 type IV secretion system protein VirD4 [Wolbachia endosymbiont of Armadillidium vulgare]	wFol_01950 virD4 Type IV secretion system protein VirD4 220932_223148 forward MW_84469	OCA05979.1 type IV secretory system Conjugative DNA transfer family protein [Wolbachia endosymbiont of Trichogramma pretiosum]	wLcla02660 virD4 Type IV secretion system protein VirD4 235172_237145 forward MW_75121	ONI56900.1 type IV secretion system protein VirD4 [Wolbachia pipientis wUni]	OEY87141.1 type IV secretion system protein VirD4 [Wolbachia pipientis]		OG0000126	1	1	1	1	1	1	1	1	1	1	1	1	1	1	1	1	1	1		1	0		OG0000126	#DIV/0!	#DIV/0!	#DIV/0!	#DIV/0!	#DIV/0!	#DIV/0!
OG0000127	wOo_07070 wOo_07070 methylase of polypeptide chain release factor 637195_638031 reverse MW_32029	WP_025264054.1 protein-_glutamine-N5_ methyltransferase_ release factor-specific [Wolbachia endosymbiont of Onchocerca volvulus]	gi|58584543|ref|YP_198116.1| Methylase of polypeptide chain release factor [Wolbachia endosymbiont strain TRS of Brugia malayi]	BAP00108.1 modification methylase HemK family [Wolbachia endosymbiont of Cimex lectularius]	CDR78412.1 modification methylase_ HemK family_Release factor glutamine methyltransferase_N5-glutamine S-adenosyl-L-methionine-dependent methyltransferase_Methylase of polypeptide chain release factors_protein-_glutamine-N5_ methyltransferase_ release factor-specific_Methyltransferase small domain [Wolbachia]	AAS13778.1 modification methylase_ HemK family [Wolbachia endosymbiont of Drosophila melanogaster]	AGJ99510.1 Modification methylase_ HemK family [Wolbachia endosymbiont of Drosophila simulans wHa]	ACN94882.1 modification methylase_ HemK family [Wolbachia sp. wRi]	AGJ98703.1 Modification methylase_ HemK family [Wolbachia endosymbiont of Drosophila simulans wNo]	CAQ54673.1 modification methylase_ HemK family [Wolbachia endosymbiont of Culex quinquefasciatus Pel]	WP_038198497.1 protein-_glutamine-N5_ methyltransferase_ release factor-specific [Wolbachia pipientis]	WP_019236648.1 N5-glutamine S-adenosyl-L-methionine-dependent methyltransferase [Wolbachia pipientis]	WP_047759013.1 SAM-dependent methyltransferase [Wolbachia endosymbiont of Armadillidium vulgare]	wFol_08170 wFol_08170 Modification methylase_ HemK family 981244_982083 forward MW_31582	OCA07009.1 protein-_glutamine-N5_ methyltransferase_ release factor-specific [Wolbachia endosymbiont of Trichogramma pretiosum]	wLcla11350 wLcla11350 Modification methylase_ HemK family 1048124_1048975 reverse MW_32593	ONI56903.1 protein-_glutamine-N5_ methyltransferase_ release factor-specific [Wolbachia pipientis wUni]	OEY86663.1 protein-_glutamine-N5_ methyltransferase_ release factor-specific [Wolbachia pipientis]		OG0000127	1	1	1	1	1	1	1	1	1	1	1	1	1	1	1	1	1	1		1	0		OG0000127	#DIV/0!	#DIV/0!	#DIV/0!	#DIV/0!	#DIV/0!	#DIV/0!
OG0000128	wOo_01590 wOo_01590 transcription antiterminator 140144_140974 forward MW_32411	WP_014868770.1 MULTISPECIES_ transcription termination/antitermination factor NusG [Wolbachia]	gi|58584909|ref|YP_198482.1| Transcription antiterminator [Wolbachia endosymbiont strain TRS of Brugia malayi]	BAP00207.1 transcription antiterminator [Wolbachia endosymbiont of Cimex lectularius]	CDR78417.1 Transcription antiterminator_Transcription antitermination protein nusG_transcription antitermination protein NusG_transcription termination/antitermination factor NusG_Transcription termination factor nusG [Wolbachia]	AAS13786.1 transcription antitermination protein NusG_ putative [Wolbachia endosymbiont of Drosophila melanogaster]	AGJ99516.1 Transcription antitermination protein NusG [Wolbachia endosymbiont of Drosophila simulans wHa]	ACN94888.1 Transcription antiterminator [Wolbachia sp. wRi]	AGJ98697.1 Transcription antitermination protein nusG [Wolbachia endosymbiont of Drosophila simulans wNo]	CAQ54667.1 transcription antiterminator [Wolbachia endosymbiont of Culex quinquefasciatus Pel]	WP_038198504.1 transcription termination/antitermination factor NusG [Wolbachia pipientis]	WP_010406831.1 MULTISPECIES_ transcription termination/antitermination factor NusG [Wolbachia]	WP_047759009.1 transcriptional antiterminator [Wolbachia endosymbiont of Armadillidium vulgare]	wFol_00490 nusG Transcription termination/antitermination protein NusG 63895_64731 forward MW_32451	OCA07015.1 transcription termination/antitermination factor NusG [Wolbachia endosymbiont of Trichogramma pretiosum]	wLcla05030 nusG Transcription termination/antitermination protein NusG 451329_452165 reverse MW_32753	ONI56877.1 transcription termination/antitermination factor NusG [Wolbachia pipientis wUni]	OEY86801.1 transcription termination/antitermination factor NusG [Wolbachia pipientis]		OG0000128	1	1	1	1	1	1	1	1	1	1	1	1	1	1	1	1	1	1		1	0		OG0000128	#DIV/0!	#DIV/0!	#DIV/0!	#DIV/0!	#DIV/0!	#DIV/0!
OG0000129	wOo_01600 wOo_01600 50S ribosomal protein L11 140977_141417 forward MW_15710	WP_014868771.1 MULTISPECIES_ 50S ribosomal protein L11 [Wolbachia]	gi|58584908|ref|YP_198481.1| Ribosomal protein L11 [Wolbachia endosymbiont strain TRS of Brugia malayi]	BAP00208.1 50S ribosomal protein L11 [Wolbachia endosymbiont of Cimex lectularius]	CDR78418.1 50S ribosomal protein L11_50S ribosomal protein L11_50S ribosomal protein L11_ribosomal protein L11_Ribosomal protein L11_ RNA binding domain [Wolbachia]	AAS13787.1 ribosomal protein L11 [Wolbachia endosymbiont of Drosophila melanogaster]	AGJ99517.1 Ribosomal protein L11 [Wolbachia endosymbiont of Drosophila simulans wHa]	ACN94889.1 ribosomal protein L11 [Wolbachia sp. wRi]	AGJ98696.1 50S Ribosomal protein L11 [Wolbachia endosymbiont of Drosophila simulans wNo]	CAQ54666.1 ribosomal protein L11 [Wolbachia endosymbiont of Culex quinquefasciatus Pel]	WP_038198505.1 50S ribosomal protein L11 [Wolbachia pipientis]	WP_010406829.1 MULTISPECIES_ 50S ribosomal protein L11 [Wolbachia]	WP_047759008.1 50S ribosomal protein L11 [Wolbachia endosymbiont of Armadillidium vulgare]	wFol_00500 rplK 50S ribosomal protein L11 64734_65174 forward MW_15554	OCA07016.1 ribosomal protein L11 [Wolbachia endosymbiont of Trichogramma pretiosum]	wLcla05020 rplK 50S ribosomal protein L11 450886_451326 reverse MW_15292	ONI56878.1 ribosomal protein L11_ N-terminal domain protein [Wolbachia pipientis wUni]	OEY86802.1 50S ribosomal protein L11 [Wolbachia pipientis]		OG0000129	1	1	1	1	1	1	1	1	1	1	1	1	1	1	1	1	1	1		1	0		OG0000129	#DIV/0!	#DIV/0!	#DIV/0!	#DIV/0!	#DIV/0!	#DIV/0!
OG0000130	wOo_01610 wOo_01610 50S ribosomal protein L1 141422_142081 forward MW_24099	WP_025264280.1 50S ribosomal protein L1 [Wolbachia endosymbiont of Onchocerca volvulus]	gi|58584907|ref|YP_198480.1| Ribosomal protein L1 [Wolbachia endosymbiont strain TRS of Brugia malayi]	BAP00209.1 ribosomal protein L1 [Wolbachia endosymbiont of Cimex lectularius]	CDR78419.1 50S ribosomal protein L1_50S ribosomal protein L1_50S ribosomal protein L1_ribosomal protein L1_Ribosomal protein L1p/L10e family [Wolbachia]	AAS13788.1 ribosomal protein L1 [Wolbachia endosymbiont of Drosophila melanogaster]	AGJ99518.1 50S ribosomal protein L1 [Wolbachia endosymbiont of Drosophila simulans wHa]	ACN94890.1 ribosomal protein L1 [Wolbachia sp. wRi]	AGJ98695.1 50S ribosomal protein L1 [Wolbachia endosymbiont of Drosophila simulans wNo]	CAQ54665.1 ribosomal protein L1 [Wolbachia endosymbiont of Culex quinquefasciatus Pel]	WP_038198507.1 50S ribosomal protein L1 [Wolbachia pipientis]	WP_019236646.1 50S ribosomal protein L1 [Wolbachia pipientis]	WP_047759007.1 50S ribosomal protein L1 [Wolbachia endosymbiont of Armadillidium vulgare]	wFol_00510 rplA 50S ribosomal protein L1 65179_65841 forward MW_24115	OCA07017.1 ribosomal protein L1 [Wolbachia endosymbiont of Trichogramma pretiosum]	wLcla05010 rplA 50S ribosomal protein L1 450228_450881 reverse MW_23775	ONI56879.1 ribosomal protein L1 [Wolbachia pipientis wUni]	OEY86803.1 50S ribosomal protein L1 [Wolbachia pipientis]		OG0000130	1	1	1	1	1	1	1	1	1	1	1	1	1	1	1	1	1	1		1	0		OG0000130	#DIV/0!	#DIV/0!	#DIV/0!	#DIV/0!	#DIV/0!	#DIV/0!
OG0000131	wOo_01620 wOo_01620 50S ribosomal protein L10 142086_142604 forward MW_19393	WP_025264281.1 50S ribosomal protein L10 [Wolbachia endosymbiont of Onchocerca volvulus]	gi|58584906|ref|YP_198479.1| Ribosomal protein L10 [Wolbachia endosymbiont strain TRS of Brugia malayi]	BAP00210.1 ribosomal protein L10 [Wolbachia endosymbiont of Cimex lectularius]	CDR78420.1 50S ribosomal protein L10_RRP-L10_50S ribosomal protein L10_Ribosomal protein L10_Ribosomal protein L10 [Wolbachia]	AAS13789.1 ribosomal protein L10 [Wolbachia endosymbiont of Drosophila melanogaster]	AGJ99519.1 50S ribosomal protein L10 [Wolbachia endosymbiont of Drosophila simulans wHa]	ACN94891.1 ribosomal protein L10 [Wolbachia sp. wRi]	AGJ98694.1 50S ribosomal protein L10 [Wolbachia endosymbiont of Drosophila simulans wNo]	CAQ54664.1 ribosomal protein L10 [Wolbachia endosymbiont of Culex quinquefasciatus Pel]	WP_038198509.1 50S ribosomal protein L10 [Wolbachia pipientis]	WP_007301987.1 MULTISPECIES_ 50S ribosomal protein L10 [Wolbachia]	WP_047759006.1 50S ribosomal protein L10 [Wolbachia endosymbiont of Armadillidium vulgare]	wFol_00520 rplJ 50S ribosomal protein L10 65854_66372 forward MW_19259	OCA07018.1 ribosomal L10 family protein [Wolbachia endosymbiont of Trichogramma pretiosum]	wLcla05000 rplJ 50S ribosomal protein L10 449697_450215 reverse MW_19290	ONI56880.1 ribosomal protein L10 family protein [Wolbachia pipientis wUni]	OEY86804.1 50S ribosomal protein L10 [Wolbachia pipientis]		OG0000131	1	1	1	1	1	1	1	1	1	1	1	1	1	1	1	1	1	1		1	0		OG0000131	#DIV/0!	#DIV/0!	#DIV/0!	#DIV/0!	#DIV/0!	#DIV/0!
OG0000132	wOo_01630 wOo_01630 50S ribosomal protein L7L12 142630_143031 forward MW_14328	WP_025264282.1 50S ribosomal protein L7/L12 [Wolbachia endosymbiont of Onchocerca volvulus]	gi|58584905|ref|YP_198478.1| Ribosomal protein L7/L12 [Wolbachia endosymbiont strain TRS of Brugia malayi]	BAP00211.1 ribosomal protein L7/L12 [Wolbachia endosymbiont of Cimex lectularius]	CDR78421.1 50S ribosomal protein L7/L12_50S ribosomal protein L7/L12_50S ribosomal protein L7/L12_ribosomal protein L7/L12_Ribosomal protein L7/L12 C-terminal domain [Wolbachia]	AAS13790.1 ribosomal protein L7/L12 [Wolbachia endosymbiont of Drosophila melanogaster]	AGJ99520.1 50S ribosomal protein L7/L12 [Wolbachia endosymbiont of Drosophila simulans wHa]	ACN94892.1 ribosomal protein L7/L12 [Wolbachia sp. wRi]	AGJ98693.1 50S ribosomal protein L7/L12 [Wolbachia endosymbiont of Drosophila simulans wNo]	CAQ54663.1 ribosomal protein L7/L12 [Wolbachia endosymbiont of Culex quinquefasciatus Pel]	WP_007551887.1 MULTISPECIES_ 50S ribosomal protein L7/L12 [Wolbachia]	WP_007301986.1 MULTISPECIES_ 50S ribosomal protein L7/L12 [Wolbachia]	WP_047759005.1 50S ribosomal protein L7/L12 [Wolbachia endosymbiont of Armadillidium vulgare]	wFol_00530 rplL 50S ribosomal protein L7/L12 66399_66794 forward MW_13835	OCA07019.1 ribosomal protein L7/L12 [Wolbachia endosymbiont of Trichogramma pretiosum]	wLcla04990 rplL 50S ribosomal protein L7/L12 449269_449670 reverse MW_14165	ONI56881.1 ribosomal protein L7/L12 [Wolbachia pipientis wUni]	OEY86805.1 50S ribosomal protein L7/L12 [Wolbachia pipientis]		OG0000132	1	1	1	1	1	1	1	1	1	1	1	1	1	1	1	1	1	1		1	0		OG0000132	#DIV/0!	#DIV/0!	#DIV/0!	#DIV/0!	#DIV/0!	#DIV/0!
OG0000133	wOo_04520 wOo_04520 seryl-tRNA synthetase 386250_387548 forward MW_49957	WP_025263930.1 serine--tRNA ligase [Wolbachia endosymbiont of Onchocerca volvulus]	gi|58584721|ref|YP_198294.1| Seryl-tRNA synthetase [Wolbachia endosymbiont strain TRS of Brugia malayi]	BAP00482.1 seryl-tRNA synthetase [Wolbachia endosymbiont of Cimex lectularius]	CDR78425.1 seryl-tRNA synthetase_Serine--tRNA ligase_seryl-tRNA synthetase_Prolyl-tRNA synthetase_serine--tRNA ligase_tRNA synthetase class II core domain _G_ H_ P_ S and T_ [Wolbachia]	AAS13795.1 seryl-tRNA synthetase [Wolbachia endosymbiont of Drosophila melanogaster]	AGJ99524.1 Seryl-tRNA synthetase [Wolbachia endosymbiont of Drosophila simulans wHa]	ACN94896.1 seryl-tRNA synthetase [Wolbachia sp. wRi]	AGJ98689.1 Seryl-tRNA synthetase [Wolbachia endosymbiont of Drosophila simulans wNo]	CAQ54659.1 seryl-tRNA synthetase [Wolbachia endosymbiont of Culex quinquefasciatus Pel]	WP_038198549.1 serine--tRNA ligase [Wolbachia pipientis]	WP_026097230.1 serine--tRNA ligase [Wolbachia pipientis]	WP_047759100.1 serine--tRNA ligase [Wolbachia endosymbiont of Armadillidium vulgare]	wFol_12530 serS Serine--tRNA ligase 1479418_1480695 forward MW_48128	OCA07023.1 serine--tRNA ligase [Wolbachia endosymbiont of Trichogramma pretiosum]	wLcla04950 serS Serine--tRNA ligase 436831_438135 reverse MW_49942	ONI56840.1 tRNA synthetase class II core domain family protein_ partial [Wolbachia pipientis wUni]	OEY87084.1 serine--tRNA ligase [Wolbachia pipientis]		OG0000133	1	1	1	1	1	1	1	1	1	1	1	1	1	1	1	1	1	1		1	0		OG0000133	#DIV/0!	#DIV/0!	#DIV/0!	#DIV/0!	#DIV/0!	#DIV/0!
OG0000134	wOo_04530 wOo_04530 phosphoribosylamine--glycine ligase 387584_388855 forward MW_46243	WP_025263931.1 phosphoribosylamine--glycine ligase [Wolbachia endosymbiont of Onchocerca volvulus]	gi|58584722|ref|YP_198295.1| Phosphoribosylamine-glycine ligase [Wolbachia endosymbiont strain TRS of Brugia malayi]	BAP00483.1 phosphoribosylamine-glycine ligase [Wolbachia endosymbiont of Cimex lectularius]	CDR78426.1 phosphoribosylamine--glycine ligase_Phosphoribosylamine--glycine ligase_phosphoribosylamine--glycine ligase_Phosphoribosylamine-glycine ligase_phosphoribosylamine--glycine ligase_Phosphoribosylglycinamide synthetase_ ATP-grasp _A_ domain [Wolbachia]	AAS13796.1 phosphoribosylamine--glycine ligase [Wolbachia endosymbiont of Drosophila melanogaster]	AGJ99525.1 Phosphoribosylamine--glycine ligase [Wolbachia endosymbiont of Drosophila simulans wHa]	ACN94897.1 Phosphoribosylamine-glycine ligase [Wolbachia sp. wRi]	AGJ98688.1 Phosphoribosylamine--glycine ligase [Wolbachia endosymbiont of Drosophila simulans wNo]	CAQ54658.1 phosphoribosylamine--glycine ligase [Wolbachia endosymbiont of Culex quinquefasciatus Pel]	WP_038198520.1 phosphoribosylamine--glycine ligase [Wolbachia pipientis]	WP_019236641.1 phosphoribosylamine--glycine ligase [Wolbachia pipientis]	WP_047759003.1 phosphoribosylamine--glycine ligase [Wolbachia endosymbiont of Armadillidium vulgare]	wFol_12540 purD Phosphoribosylamine--glycine ligase 1480730_1482001 forward MW_46368	OCA07024.1 phosphoribosylamine--glycine ligase [Wolbachia endosymbiont of Trichogramma pretiosum]	wLcla04940 purD Phosphoribosylamine--glycine ligase 435528_436799 reverse MW_46247	ONI56841.1 phosphoribosylamine--glycine ligase [Wolbachia pipientis wUni]	OEY87085.1 phosphoribosylamine--glycine ligase [Wolbachia pipientis]		OG0000134	1	1	1	1	1	1	1	1	1	1	1	1	1	1	1	1	1	1		1	0		OG0000134	#DIV/0!	#DIV/0!	#DIV/0!	#DIV/0!	#DIV/0!	#DIV/0!
OG0000135				BAO99770.1 putative uncharacterized protein [Wolbachia endosymbiont of Cimex lectularius]	CDR78428.1 ankyrin repeat domain protein_Piwi/Argonaute/Zwille siRNA-binding domain [Wolbachia]	AAS13799.1 hypothetical protein WD_0033 [Wolbachia endosymbiont of Drosophila melanogaster], AAS13800.1 hypothetical protein WD_0034 [Wolbachia endosymbiont of Drosophila melanogaster]	AGJ99526.1 Putative siRNA binding protein [Wolbachia endosymbiont of Drosophila simulans wHa]	ACN94898.1 ankyrin repeat domain protein [Wolbachia sp. wRi]	AGJ98971.1 hypothetical protein wNo_05520 [Wolbachia endosymbiont of Drosophila simulans wNo], AGJ99077.1 hypothetical protein wNo_06690 [Wolbachia endosymbiont of Drosophila simulans wNo]	CAQ54262.1 Hypothetical protein WP0154 [Wolbachia endosymbiont of Culex quinquefasciatus Pel], CAQ54972.1 hypothetical protein WP0864 [Wolbachia endosymbiont of Culex quinquefasciatus Pel]		WP_007302267.1 MULTISPECIES_ hypothetical protein [Wolbachia]	WP_047759816.1 hypothetical protein_ partial [Wolbachia endosymbiont of Armadillidium vulgare], WP_047759847.1 hypothetical protein_ partial [Wolbachia endosymbiont of Armadillidium vulgare]	wFol_13600 wFol_13600 Putative siRNA binding protein 1615264_1616856 reverse MW_57187	OCA06472.1 hypothetical protein wTpre_806 [Wolbachia endosymbiont of Trichogramma pretiosum], OCA06473.1 piwi/Argonaute/Zwille siRNA-binding domain protein [Wolbachia endosymbiont of Trichogramma pretiosum], OCA06474.1 hypothetical protein wTpre_808 [Wolbachia endosymbiont of Trichogramma pretiosum]		ONI56843.1 hypothetical protein N500_0039 [Wolbachia pipientis wUni]			OG0000135	0	0	0	1	1	2	1	1	2	2	0	1	2	1	3	0	1	0		1	0.907485		OG0000135	-1.10195	-1.10195	-1.10195	0	0	1.10195
OG0000136	wOo_03930 wOo_03930 phosphoribosylpyrophosphate synthetase 337252_338286 forward MW_37846	WP_025264378.1 ribose-phosphate pyrophosphokinase [Wolbachia endosymbiont of Onchocerca volvulus]	gi|58584364|ref|YP_197937.1| Phosphoribosylpyrophosphate synthetase [Wolbachia endosymbiont strain TRS of Brugia malayi]	BAP00336.1 ribose-phosphate pyrophosphokinase [Wolbachia endosymbiont of Cimex lectularius]	CDR78430.1 ribose-phosphate pyrophosphokinase_Ribose-phosphate pyrophosphokinase_ribose-phosphate pyrophosphokinase_ribose-phosphate diphosphokinase_Phosphoribosyl transferase domain [Wolbachia]	AAS13802.1 ribose-phosphate pyrophosphokinase [Wolbachia endosymbiont of Drosophila melanogaster]	AGJ99528.1 Ribose-phosphate pyrophosphokinase [Wolbachia endosymbiont of Drosophila simulans wHa]	ACN94900.1 ribose-phosphate pyrophosphokinase [Wolbachia sp. wRi]	AGJ99473.1 Ribose-phosphate pyrophosphokinase [Wolbachia endosymbiont of Drosophila simulans wNo]	CAQ54335.1 ribose-phosphate pyrophosphokinase [Wolbachia endosymbiont of Culex quinquefasciatus Pel]	WP_038198523.1 ribose-phosphate pyrophosphokinase [Wolbachia pipientis]	WP_019236386.1 ribose-phosphate pyrophosphokinase [Wolbachia pipientis]	WP_047758688.1 ribose-phosphate pyrophosphokinase [Wolbachia endosymbiont of Armadillidium vulgare]	wFol_02400 prsA Ribose-phosphate pyrophosphokinase 280739_281677 forward MW_33390	OCA06201.1 ribose-phosphate diphosphokinase family protein [Wolbachia endosymbiont of Trichogramma pretiosum]	wLcla04360 prsA Ribose-phosphate pyrophosphokinase 384483_385403 reverse MW_32939	ONI56845.1 ribose-phosphate pyrophosphokinase [Wolbachia pipientis wUni]	OEY86587.1 ribose-phosphate pyrophosphokinase [Wolbachia pipientis]		OG0000136	1	1	1	1	1	1	1	1	1	1	1	1	1	1	1	1	1	1		1	0		OG0000136	#DIV/0!	#DIV/0!	#DIV/0!	#DIV/0!	#DIV/0!	#DIV/0!
OG0000137	wOo_03940 wOo_03940 Asp-tRNAAsnGlu-tRNAGln amidotransferase C subunit 338276_338629 forward MW_13429	WP_025264379.1 glutamyl amidotransferase [Wolbachia endosymbiont of Onchocerca volvulus]	gi|58584363|ref|YP_197936.1| Asp-tRNAAsn/Glu-tRNAGln amidotransferase C subunit [Wolbachia endosymbiont strain TRS of Brugia malayi]	BAP00337.1 glutamyl-tRNA_Gln_ amidotransferase C subunit putative [Wolbachia endosymbiont of Cimex lectularius]	CDR78431.1 glutamyl-tRNA_Gln_ amidotransferase_ C subunit_Glutamyl-tRNA_Gln_ amidotransferase subunit C_aspartyl/glutamyl-tRNA amidotransferase subunit C_aspartyl/glutamyl-tRNA_Asn/Gln_ amidotransferase_ C subunit_Glu-tRNAGln amidotransferase C subunit [Wolbachia]	AAS13803.1 glutamyl-tRNA_Gln_ amidotransferase_ C subunit_ putative [Wolbachia endosymbiont of Drosophila melanogaster]	AGJ99529.1 Glutamyl-tRNA_Gln_ amidotransferase_ C subunit_ putative [Wolbachia endosymbiont of Drosophila simulans wHa]	ACN94901.1 glutamyl-tRNA_Gln_ amidotransferase_ C subunit_ putative [Wolbachia sp. wRi]	AGJ99474.1 Glutamyl-tRNA_Gln_ amidotransferase_ C subunit [Wolbachia endosymbiont of Drosophila simulans wNo]	CAQ54334.1 glutamyl-tRNA_Gln_ amidotransferase_ C subunit [Wolbachia endosymbiont of Culex quinquefasciatus Pel]	WP_010962323.1 MULTISPECIES_ glutamyl amidotransferase [Wolbachia]	WP_007302647.1 MULTISPECIES_ glutamyl amidotransferase [Wolbachia]	WP_047758689.1 glutamyl amidotransferase [Wolbachia endosymbiont of Armadillidium vulgare]	wFol_02410 wFol_02410 Glutamyl-tRNA_Gln_ amidotransferase_ C subunit_ putative 281667_282020 forward MW_13590	OCA06200.1 aspartyl/glutamyl-tRNA_Asn/Gln_ amidotransferase_ C subunit [Wolbachia endosymbiont of Trichogramma pretiosum]	wLcla04350 gatC Glutamyl-tRNA_Gln_ amidotransferase_ C subunit 384140_384493 reverse MW_13554	ONI56847.1 glutamyl-tRNA_Gln_ and/or aspartyl-tRNA_Asn_ amidotransferase_ C subunit [Wolbachia pipientis wUni]	OEY86586.1 glutamyl amidotransferase [Wolbachia pipientis]		OG0000137	1	1	1	1	1	1	1	1	1	1	1	1	1	1	1	1	1	1		1	0		OG0000137	#DIV/0!	#DIV/0!	#DIV/0!	#DIV/0!	#DIV/0!	#DIV/0!
OG0000138	wOo_02280 wOo_02280 metallo-beta-lactamase superfamily hydrolase 204318_205952 forward MW_60787	WP_025264305.1 MBL fold hydrolase [Wolbachia endosymbiont of Onchocerca volvulus]	gi|58584726|ref|YP_198299.1| Predicted hydrolase of the metallo-beta-lactamase superfamily [Wolbachia endosymbiont strain TRS of Brugia malayi]	BAO99975.1 predicted hydrolase of the metallo-beta-lactamase superfamily [Wolbachia endosymbiont of Cimex lectularius]	CDR78433.1 metallo-beta-lactamase family protein_Ribonuclease J 1_metal-dependent hydrolase_Predicted metal-dependent RNase_ consists of a metallo-beta-lactamase domain and an RNA-binding KH domain_conserved hypothetical protein_Metallo-beta-lactamase superfamily [Wolbachia]	AAS13805.1 metallo-beta-lactamase family protein [Wolbachia endosymbiont of Drosophila melanogaster]	AGJ99531.1 Putative RNA-metabolising metallo-beta-lactamase family protein [Wolbachia endosymbiont of Drosophila simulans wHa]	ACN94903.1 Predicted hydrolase of the metallo-beta-lactamase superfamily [Wolbachia sp. wRi]	AGJ99476.1 Metallo-beta-lactamase family protein [Wolbachia endosymbiont of Drosophila simulans wNo]	CAQ54331.1 metallo-beta-lactamase family protein [Wolbachia endosymbiont of Culex quinquefasciatus Pel]	WP_038198529.1 MBL fold hydrolase [Wolbachia pipientis]	WP_019236385.1 MBL fold hydrolase [Wolbachia pipientis]	WP_047758690.1 Pmetallo-beta-lactamase [Wolbachia endosymbiont of Armadillidium vulgare]	wFol_14090 wFol_14090 Putative RNA-metabolising metallo-beta-lactamase family protein 1679304_1680938 forward MW_60544	OCA06197.1 metallo-beta-lactamase superfamily protein [Wolbachia endosymbiont of Trichogramma pretiosum]	wLcla04330 wLcla04330 Metallo-beta-lactamase family protein 380731_382398 forward MW_61830	ONI56849.1 metallo-beta-lactamase superfamily protein [Wolbachia pipientis wUni]	OEY86597.1 RNase J family beta-CASP ribonuclease [Wolbachia pipientis]		OG0000138	1	1	1	1	1	1	1	1	1	1	1	1	1	1	1	1	1	1		1	0		OG0000138	#DIV/0!	#DIV/0!	#DIV/0!	#DIV/0!	#DIV/0!	#DIV/0!
OG0000139	wOo_05900 wOo_05900 DnaJ-like molecular chaperone 522050_523159 reverse MW_40675	WP_014869007.1 MULTISPECIES_ molecular chaperone DnaJ [Wolbachia]	gi|58585042|ref|YP_198615.1| DnaJ-class molecular chaperone with C-terminal Zn finger domain [Wolbachia endosymbiont strain TRS of Brugia malayi]	BAO99786.1 molecular chaperone DnaJ [Wolbachia endosymbiont of Cimex lectularius]	CDR78434.1 chaperone protein DnaJ_Chaperone protein DnaJ_chaperone protein DnaJ_Preprotein translocase subunit Sec63_chaperone protein DnaJ_DnaJ C terminal domain [Wolbachia]	AAS13806.1 dnaJ protein [Wolbachia endosymbiont of Drosophila melanogaster]	AGJ99532.1 Chaperone protein DnaJ [Wolbachia endosymbiont of Drosophila simulans wHa]	ACN94904.1 dnaJ protein [Wolbachia sp. wRi]	AGJ99477.1 Chaperone protein DnaJ [Wolbachia endosymbiont of Drosophila simulans wNo]	CAQ54330.1 dnaJ protein [Wolbachia endosymbiont of Culex quinquefasciatus Pel]	WP_038198530.1 molecular chaperone DnaJ [Wolbachia pipientis]	WP_007302650.1 MULTISPECIES_ molecular chaperone DnaJ [Wolbachia]	WP_047758691.1 molecular chaperone DnaJ [Wolbachia endosymbiont of Armadillidium vulgare]	wFol_00560 dnaJ Chaperone protein DnaJ 77241_78386 reverse MW_41711	OCA06196.1 chaperone protein DnaJ [Wolbachia endosymbiont of Trichogramma pretiosum]	wLcla04320 dnaJ Chaperone protein DnaJ 379476_380594 forward MW_40799	ONI56850.1 chaperone protein DnaJ [Wolbachia pipientis wUni]	OEY86559.1 molecular chaperone DnaJ [Wolbachia pipientis]		OG0000139	1	1	1	1	1	1	1	1	1	1	1	1	1	1	1	1	1	1		1	0		OG0000139	#DIV/0!	#DIV/0!	#DIV/0!	#DIV/0!	#DIV/0!	#DIV/0!
OG0000140	wOo_08190 wOo_08190 protocatechuate 34-dioxygenase beta subunit 732094_732738 forward MW_24047	WP_025264105.1 dioxygenase [Wolbachia endosymbiont of Onchocerca volvulus]	gi|58584888|ref|YP_198461.1| Protocatechuate 3_4-dioxygenase beta subunit [Wolbachia endosymbiont strain TRS of Brugia malayi]	BAP00380.1 protocatechuate 3_4-dioxygenase beta subunit [Wolbachia endosymbiont of Cimex lectularius]	CDR78444.1 dioxygenase_Protocatechuate 3_4-dioxygenase beta chain_Protocatechuate 3_4-dioxygenase beta subunit_protocatechuate 3_4-dioxygenase_ beta subunit_Dioxygenase [Wolbachia]	AAS13817.1 dioxygenase_ putative [Wolbachia endosymbiont of Drosophila melanogaster]	AGJ99535.1 Dioxygenase_ putative [Wolbachia endosymbiont of Drosophila simulans wHa]	ACN94909.1 dioxygenase_ putative [Wolbachia sp. wRi]	AGJ99060.1 Dioxygenase [Wolbachia endosymbiont of Drosophila simulans wNo]	CAQ55199.1 dioxygenase [Wolbachia endosymbiont of Culex quinquefasciatus Pel]	WP_010962336.1 MULTISPECIES_ dioxygenase [Wolbachia]	WP_012481990.1 MULTISPECIES_ dioxygenase [Wolbachia]	WP_047759744.1 dioxygenase [Wolbachia endosymbiont of Armadillidium vulgare]	wFol_07740 wFol_07740 Putative dioxygenase 920348_920998 reverse MW_24053	OCA06391.1 dioxygenase family protein [Wolbachia endosymbiont of Trichogramma pretiosum]	wLcla05690 pcaH Putative dioxygenase 529206_529904 reverse MW_25927	ONI56857.1 dioxygenase family protein [Wolbachia pipientis wUni]	OEY86632.1 dioxygenase [Wolbachia pipientis]		OG0000140	1	1	1	1	1	1	1	1	1	1	1	1	1	1	1	1	1	1		1	0		OG0000140	#DIV/0!	#DIV/0!	#DIV/0!	#DIV/0!	#DIV/0!	#DIV/0!
OG0000141	wOo_08200 wOo_08200 leucyl aminopeptidase 732798_734261 forward MW_53729	WP_025264106.1 leucyl aminopeptidase [Wolbachia endosymbiont of Onchocerca volvulus]	gi|58584887|ref|YP_198460.1| Leucyl aminopeptidase [Wolbachia endosymbiont strain TRS of Brugia malayi]	BAP00381.1 leucyl aminopeptidase [Wolbachia endosymbiont of Cimex lectularius]	CDR78445.1 leucyl aminopeptidase_Cytosol aminopeptidase_multifunctional aminopeptidase A_Cytosol aminopeptidase family_ catalytic domain [Wolbachia]	AAS13818.1 cytosol aminopeptidase [Wolbachia endosymbiont of Drosophila melanogaster]	AGJ99536.1 Putative cytosol aminopeptidase [Wolbachia endosymbiont of Drosophila simulans wHa]	ACN94910.1 leucyl aminopeptidase [Wolbachia sp. wRi]	AGJ99061.1 Putative cytosol aminopeptidase [Wolbachia endosymbiont of Drosophila simulans wNo]	CAQ55200.1 cytosol aminopeptidase [Wolbachia endosymbiont of Culex quinquefasciatus Pel]	WP_038198783.1 leucyl aminopeptidase [Wolbachia pipientis]	WP_051018850.1 leucyl aminopeptidase [Wolbachia pipientis]	WP_047759743.1 peptidase M17 [Wolbachia endosymbiont of Armadillidium vulgare]	wFol_07110 pepA Probable cytosol aminopeptidase 845226_846695 forward MW_53280	OCA06389.1 cytosol aminopeptidase family_ catalytic domain protein [Wolbachia endosymbiont of Trichogramma pretiosum]	wLcla05680 pepA Probable cytosol aminopeptidase 527613_529070 reverse MW_53103	ONI56858.1 cytosol aminopeptidase [Wolbachia pipientis wUni]	OEY86979.1 leucyl aminopeptidase [Wolbachia pipientis]		OG0000141	1	1	1	1	1	1	1	1	1	1	1	1	1	1	1	1	1	1		1	0		OG0000141	#DIV/0!	#DIV/0!	#DIV/0!	#DIV/0!	#DIV/0!	#DIV/0!
OG0000142	wOo_00410 wOo_00410 membrane protein related to metalloendopeptidase 33508_34119 forward MW_23134	WP_025264236.1 peptidase M24 [Wolbachia endosymbiont of Onchocerca volvulus]	gi|58584863|ref|YP_198436.1| Membrane protein related to metalloendopeptidase [Wolbachia endosymbiont strain TRS of Brugia malayi]	BAO99431.1 peptidase M23/M37 family [Wolbachia endosymbiont of Cimex lectularius]	CDR78449.1 peptidase_ M23/M37 family_Murein hydrolase activator NlpD precursor_lipoprotein NlpD_Membrane-bound metallopeptidase_Peptidase family M23 [Wolbachia]	AAS13822.1 peptidase_ M23/M37 family [Wolbachia endosymbiont of Drosophila melanogaster]	AGJ99540.1 Putative lipoprotein NlpD [Wolbachia endosymbiont of Drosophila simulans wHa]	ACN94914.1 peptidase_ M23/M37 family [Wolbachia sp. wRi]	AGJ98828.1 peptidase_ M23/M37 family [Wolbachia endosymbiont of Drosophila simulans wNo]	CAQ54848.1 Putative Lipoprotein [Wolbachia endosymbiont of Culex quinquefasciatus Pel]	WP_038199047.1 peptidase M24 [Wolbachia pipientis]	WP_026097241.1 MULTISPECIES_ peptidase M24 [Wolbachia]	WP_047759855.1 peptidase M24 [Wolbachia endosymbiont of Armadillidium vulgare]	wFol_11510 nlpD Peptidase M23/M37 family 1367772_1368386 forward MW_22766	OCA06849.1 peptidase M23 family protein [Wolbachia endosymbiont of Trichogramma pretiosum]	wLcla09890 wLcla09890 Lipoprotein NlpD_ putative 901166_901756 forward MW_21884	ONI56813.1 peptidase family M23 family protein [Wolbachia pipientis wUni]	OEY86594.1 peptidase M24 [Wolbachia pipientis]		OG0000142	1	1	1	1	1	1	1	1	1	1	1	1	1	1	1	1	1	1		1	0		OG0000142	#DIV/0!	#DIV/0!	#DIV/0!	#DIV/0!	#DIV/0!	#DIV/0!
OG0000143	wOo_09670 wOo_09670 2-polyprenyl-6-methoxyphenol hydroxylase FAD-dependent oxidoreductase 879414_880571 reverse MW_43472	WP_025264166.1 2-octaprenyl-3-methyl-6-methoxy-1_4-benzoquinol hydroxylase [Wolbachia endosymbiont of Onchocerca volvulus]	gi|58584325|ref|YP_197898.1| 2-polyprenyl-6-methoxyphenol hydroxylase_ FAD-dependent oxidoreductase [Wolbachia endosymbiont strain TRS of Brugia malayi]	BAO99618.1 2-polyprenyl-6-methoxyphenol hydroxylase [Wolbachia endosymbiont of Cimex lectularius]	CDR78460.1 monoxygenase family protein_2-octaprenyl-6-methoxyphenol hydroxylase_2-octaprenyl-6-methoxyphenyl hydroxylase_2-polyprenyl-6-methoxyphenol 4-hydroxylase_FAD binding domain [Wolbachia]	AAS13926.1 monoxygenase family protein [Wolbachia endosymbiont of Drosophila melanogaster]	AGJ99586.1 2-polyprenyl-6-methoxyphenol 4-hydroxylase_ FAD-dependent oxidoreductase [Wolbachia endosymbiont of Drosophila simulans wHa]	ACN94934.1 monoxygenase family protein [Wolbachia sp. wRi]	AGJ98522.1 2-polyprenyl-6-methoxyphenol hydroxylase_ fad-dependent oxidoreductase [Wolbachia endosymbiont of Drosophila simulans wNo]	CAQ54162.1 2-polyprenyl-6-methoxyphenol hydroxylase_ fad-dependent oxidoreductase [Wolbachia endosymbiont of Culex quinquefasciatus Pel]	WP_010082229.1 hypothetical protein [Wolbachia pipientis]	WP_019236333.1 2-octaprenyl-3-methyl-6-methoxy-1_4-benzoquinol hydroxylase [Wolbachia pipientis]	WP_047758788.1 2-octaprenyl-3-methyl-6-methoxy-1_4-benzoquinol hydroxylase [Wolbachia endosymbiont of Armadillidium vulgare]	wFol_00380 ubiH 2-polyprenyl-6-methoxyphenol 4-hydroxylase 49784_50941 forward MW_42900	OCA06148.1 2-polyprenyl-6-methoxyphenol 4-hydroxylase [Wolbachia endosymbiont of Trichogramma pretiosum]	wLcla02930 ubiH 2-polyprenyl-6-methoxyphenol hydroxylase_ fad-dependent oxidoreductase 255401_256558 reverse MW_43199	ONI56785.1 2-polyprenyl-6-methoxyphenol 4-hydroxylase [Wolbachia pipientis wUni]	OEY87072.1 2-octaprenyl-3-methyl-6-methoxy-1_4-benzoquinol hydroxylase [Wolbachia pipientis]		OG0000143	1	1	1	1	1	1	1	1	1	1	1	1	1	1	1	1	1	1		1	0		OG0000143	#DIV/0!	#DIV/0!	#DIV/0!	#DIV/0!	#DIV/0!	#DIV/0!
OG0000144	wOo_01870 wOo_01870 peptidyl-tRNA hydrolase 172448_172996 reverse MW_20609	WP_014868791.1 MULTISPECIES_ aminoacyl-tRNA hydrolase [Wolbachia]	gi|58584354|ref|YP_197927.1| Peptidyl-tRNA hydrolase [Wolbachia endosymbiont strain TRS of Brugia malayi]	BAO99922.1 peptidyl-tRNA hydrolase [Wolbachia endosymbiont of Cimex lectularius]	CDR78462.1 peptidyl-tRNA hydrolase_Peptidyl-tRNA hydrolase_peptidyl-tRNA hydrolase_Peptidyl-tRNA hydrolase_peptidyl-tRNA hydrolase_Peptidyl-tRNA hydrolase [Wolbachia]	AAS13924.1 peptidyl-tRNA hydrolase [Wolbachia endosymbiont of Drosophila melanogaster]	AGJ99584.1 Peptidyl-tRNA hydrolase [Wolbachia endosymbiont of Drosophila simulans wHa]	ACN94936.1 peptidyl-tRNA hydrolase [Wolbachia sp. wRi]	AGJ99012.1 Peptidyl-tRNA hydrolase [Wolbachia endosymbiont of Drosophila simulans wNo]	CAQ55039.1 peptidyl-tRNA hydrolase [Wolbachia endosymbiont of Culex quinquefasciatus Pel]	WP_038199691.1 aminoacyl-tRNA hydrolase [Wolbachia pipientis]	WP_007302322.1 MULTISPECIES_ aminoacyl-tRNA hydrolase [Wolbachia]	WP_047758975.1 peptidyl-tRNA hydrolase [Wolbachia endosymbiont of Armadillidium vulgare]	wFol_12010 pth Peptidyl-tRNA hydrolase 1417482_1418057 reverse MW_21190	OCA06738.1 peptidyl-tRNA hydrolase [Wolbachia endosymbiont of Trichogramma pretiosum]	wLcla08220 pth Peptidyl-tRNA hydrolase 749257_749811 forward MW_20619	ONI56787.1 peptidyl-tRNA hydrolase [Wolbachia pipientis wUni]	OEY86755.1 aminoacyl-tRNA hydrolase [Wolbachia pipientis]		OG0000144	1	1	1	1	1	1	1	1	1	1	1	1	1	1	1	1	1	1		1	0		OG0000144	#DIV/0!	#DIV/0!	#DIV/0!	#DIV/0!	#DIV/0!	#DIV/0!
OG0000145	wOo_09200 wOo_09200 NADH ubiquinone oxidoreductase 18 kDa subunit 833537_833836 forward MW_11491	WP_014869219.1 MULTISPECIES_ oxidoreductase [Wolbachia]	gi|58584802|ref|YP_198375.1| NADH_ubiquinone oxidoreductase 18 kDa subunit [Wolbachia endosymbiont strain TRS of Brugia malayi]	BAP00415.1 oxidoreductase [Wolbachia endosymbiont of Cimex lectularius]	CDR78464.1 oxidoreductase_ETC complex I subunit conserved region [Wolbachia]	AAS13922.1 oxidoreductase_ putative [Wolbachia endosymbiont of Drosophila melanogaster]	AGJ99582.1 Putative NADH-quinone oxidoreductase [Wolbachia endosymbiont of Drosophila simulans wHa]	ACN94938.1 oxidoreductase_ putative [Wolbachia sp. wRi]	AGJ99014.1 Oxidoreductase_ putative [Wolbachia endosymbiont of Drosophila simulans wNo]	CAQ55037.1 oxidoreductase_ putative [Wolbachia endosymbiont of Culex quinquefasciatus Pel]	WP_038199688.1 oxidoreductase [Wolbachia pipientis]	WP_007302320.1 MULTISPECIES_ oxidoreductase [Wolbachia]	WP_047758977.1 oxidoreductase [Wolbachia endosymbiont of Armadillidium vulgare]	wFol_06710 wFol_06710 Putative NADH-quinone oxidoreductase 796959_797261 forward MW_11476	OCA06736.1 ETC complex I subunit conserved region family protein [Wolbachia endosymbiont of Trichogramma pretiosum]	wLcla08200 wLcla08200 Putative oxidoreductase 748204_748503 reverse MW_11526	ONI56789.1 ETC complex I subunit conserved region family protein [Wolbachia pipientis wUni]	OEY86693.1 oxidoreductase [Wolbachia pipientis]		OG0000145	1	1	1	1	1	1	1	1	1	1	1	1	1	1	1	1	1	1		1	0		OG0000145	#DIV/0!	#DIV/0!	#DIV/0!	#DIV/0!	#DIV/0!	#DIV/0!
OG0000146	wOo_04140 wOo_04140 S-adenosyl-methyltransferase MraW 355573_356547 forward MW_36478	WP_025264390.1 16S rRNA _cytosine_1402_-N_4__-methyltransferase [Wolbachia endosymbiont of Onchocerca volvulus]	gi|58584368|ref|YP_197941.1| Predicted S-adenosylmethionine-dependent methyltransferase involved in cell envelope biogenesis [Wolbachia endosymbiont strain TRS of Brugia malayi]	BAO99979.1 16S rRNA _cytosine1402-N4_-methyltransferase [Wolbachia endosymbiont of Cimex lectularius]	CDR78466.1 S-adenosyl-methyltransferase MraW_Ribosomal RNA small subunit methyltransferase H_16S rRNA m_4_C1402 methyltranserfase_S-adenosyl-methyltransferase MraW_MraW methylase family [Wolbachia]	AAS13920.1 S-adenosyl-methyltransferase MraW [Wolbachia endosymbiont of Drosophila melanogaster]	AGJ99580.1 Ribosomal RNA small subunit methyltransferase H [Wolbachia endosymbiont of Drosophila simulans wHa]	ACN94940.1 S-adenosyl-methyltransferase [Wolbachia sp. wRi]	AGJ99015.1 Ribosomal RNA small subunit methyltransferase H [Wolbachia endosymbiont of Drosophila simulans wNo]	CAQ55035.1 S-adenosyl-methyltransferase MraW [Wolbachia endosymbiont of Culex quinquefasciatus Pel]	WP_010962409.1 MULTISPECIES_ ribosomal RNA small subunit methyltransferase H [Wolbachia]	WP_007302319.1 MULTISPECIES_ ribosomal RNA small subunit methyltransferase H [Wolbachia]	WP_047758978.1 16S rRNA methyltransferase [Wolbachia endosymbiont of Armadillidium vulgare]	wFol_08220 rsmH Ribosomal RNA small subunit methyltransferase H 986770_987699 forward MW_34336	OCA06734.1 16S rRNA _cytosine_1402_-N_4__-methyltransferase [Wolbachia endosymbiont of Trichogramma pretiosum]	wLcla08190 rsmH Ribosomal RNA small subunit methyltransferase H 747000_747884 forward MW_32949	ONI56791.1 S-adenosyl-methyltransferase MraW [Wolbachia pipientis wUni]	OEY87129.1 16S rRNA _cytosine_1402_-N_4__-methyltransferase [Wolbachia pipientis]		OG0000146	1	1	1	1	1	1	1	1	1	1	1	1	1	1	1	1	1	1		1	0		OG0000146	#DIV/0!	#DIV/0!	#DIV/0!	#DIV/0!	#DIV/0!	#DIV/0!
OG0000147	wOo_01650 wOo_01650 methionine aminopeptidase 152178_152969 forward MW_29374	WP_014868776.1 MULTISPECIES_ type I methionyl aminopeptidase [Wolbachia]	gi|58584372|ref|YP_197945.1| Methionine aminopeptidase [Wolbachia endosymbiont strain TRS of Brugia malayi]	BAP00313.1 methionine aminopeptidase [Wolbachia endosymbiont of Cimex lectularius]	CDR78468.1 methionine aminopeptidase_Methionine aminopeptidase_methionine aminopeptidase_Xaa-Pro aminopeptidase_methionine aminopeptidase_ type I_Metallopeptidase family M24 [Wolbachia]	AAS13918.1 methionine aminopeptidase_ type I [Wolbachia endosymbiont of Drosophila melanogaster]	AGJ99578.1 Methionine aminopeptidase [Wolbachia endosymbiont of Drosophila simulans wHa]	ACN94942.1 methionine aminopeptidase [Wolbachia sp. wRi]	AGJ99017.1 Methionine aminopeptidase [Wolbachia endosymbiont of Drosophila simulans wNo]	CAQ55033.1 methionine aminopeptidase_ type I [Wolbachia endosymbiont of Culex quinquefasciatus Pel]	WP_051955874.1 type I methionyl aminopeptidase [Wolbachia pipientis]	WP_007302317.1 MULTISPECIES_ type I methionyl aminopeptidase [Wolbachia]	WP_047758979.1 methionine aminopeptidase [Wolbachia endosymbiont of Armadillidium vulgare]	wFol_08070 map Methionine aminopeptidase 969211_969990 reverse MW_28803	OCA06732.1 methionine aminopeptidase_ type I [Wolbachia endosymbiont of Trichogramma pretiosum]	wLcla08160 map Methionine aminopeptidase 744763_745554 forward MW_29436	ONI56793.1 methionine aminopeptidase_ type I [Wolbachia pipientis wUni]	OEY86728.1 type I methionyl aminopeptidase [Wolbachia pipientis]		OG0000147	1	1	1	1	1	1	1	1	1	1	1	1	1	1	1	1	1	1		1	0		OG0000147	#DIV/0!	#DIV/0!	#DIV/0!	#DIV/0!	#DIV/0!	#DIV/0!
OG0000148	wOo_00380 wOo_00380 Actin-like ATPase involved in cell division FtsA 29735_30973 forward MW_45446	WP_025264234.1 cell division protein FtsA [Wolbachia endosymbiont of Onchocerca volvulus]	gi|58584373|ref|YP_197946.1| Actin-like ATPase involved in cell division_ FtsA [Wolbachia endosymbiont strain TRS of Brugia malayi]	BAO99562.1 cell division protein FtsA [Wolbachia endosymbiont of Cimex lectularius]	CDR78469.1 cell division protein FtsA_Cell division protein FtsA_cell division protein FtsA_Ethanolamine utilization protein_ possible chaperonin_cell division protein FtsA_Cell division protein FtsA [Wolbachia]	AAS13917.1 cell division protein FtsA [Wolbachia endosymbiont of Drosophila melanogaster]	AGJ99576.1 Cell division protein FtsA [Wolbachia endosymbiont of Drosophila simulans wHa]	ACN94943.1 cell division protein FtsA [Wolbachia sp. wRi]	AGJ99018.1 Cell division protein FtsA [Wolbachia endosymbiont of Drosophila simulans wNo]	CAQ55032.1 cell division protein FtsA [Wolbachia endosymbiont of Culex quinquefasciatus Pel]	WP_010962406.1 MULTISPECIES_ cell division protein FtsA [Wolbachia]	WP_007302316.1 MULTISPECIES_ cell division protein FtsA [Wolbachia]	WP_047758980.1 cell division protein FtsA [Wolbachia endosymbiont of Armadillidium vulgare]	wFol_08090 ftsA Cell division protein FtsA 972613_973851 reverse MW_45184	OCA06731.1 cell division protein FtsA [Wolbachia endosymbiont of Trichogramma pretiosum]	wLcla08110 ftsA Cell division protein FtsA 741253_742491 forward MW_45006	ONI56794.1 cell division protein FtsA [Wolbachia pipientis wUni]	OEY86729.1 cell division protein FtsA [Wolbachia pipientis]		OG0000148	1	1	1	1	1	1	1	1	1	1	1	1	1	1	1	1	1	1		1	0		OG0000148	#DIV/0!	#DIV/0!	#DIV/0!	#DIV/0!	#DIV/0!	#DIV/0!
OG0000149	wOo_00370 wOo_00370 N-formylmethionyl-tRNA deformylase 29053_29589 reverse MW_20380	WP_025264233.1 peptide deformylase [Wolbachia endosymbiont of Onchocerca volvulus]	gi|58584374|ref|YP_197947.1| N-formylmethionyl-tRNA deformylase [Wolbachia endosymbiont strain TRS of Brugia malayi]	BAO99563.1 N-formylmethionyl-tRNA deformylase [Wolbachia endosymbiont of Cimex lectularius]	CDR78470.1 peptide deformylase_Peptide deformylase_peptide deformylase_N-formylmethionyl-tRNA deformylase_peptide deformylase_Polypeptide deformylase [Wolbachia]	AAS13916.1 polypeptide deformylase [Wolbachia endosymbiont of Drosophila melanogaster]	AGJ99575.1 Peptide deformylase [Wolbachia endosymbiont of Drosophila simulans wHa]	ACN94944.1 polypeptide deformylase [Wolbachia sp. wRi]	AGJ99019.1 Peptide deformylase [Wolbachia endosymbiont of Drosophila simulans wNo]	CAQ55031.1 polypeptide deformylase [Wolbachia endosymbiont of Culex quinquefasciatus Pel]	WP_038199686.1 peptide deformylase [Wolbachia pipientis]	WP_007302315.1 MULTISPECIES_ peptide deformylase [Wolbachia]	WP_047758981.1 peptide deformylase [Wolbachia endosymbiont of Armadillidium vulgare]	wFol_08100 def Peptide deformylase 973998_974531 forward MW_20521	OCA06730.1 peptide deformylase [Wolbachia endosymbiont of Trichogramma pretiosum]	wLcla08100 def Peptide deformylase 740576_741115 reverse MW_20471	ONI56795.1 peptide deformylase [Wolbachia pipientis wUni]	OEY86745.1 peptide deformylase [Wolbachia pipientis]		OG0000149	1	1	1	1	1	1	1	1	1	1	1	1	1	1	1	1	1	1		1	0		OG0000149	#DIV/0!	#DIV/0!	#DIV/0!	#DIV/0!	#DIV/0!	#DIV/0!
OG0000150	wOo_00360 wOo_00360 Uracil-DNA glycosylase 28275_29060 reverse MW_29708	WP_025264232.1 DNA glycosylase [Wolbachia endosymbiont of Onchocerca volvulus]	gi|58584375|ref|YP_197948.1| Uracil-DNA glycosylase [Wolbachia endosymbiont strain TRS of Brugia malayi]	BAO99564.1 phage SPO1 DNA polymerase-related protein [Wolbachia endosymbiont of Cimex lectularius]	CDR78471.1 phage SPO1 DNA polymerase-related protein_uracil-DNA glycosylase_ family 4_Uracil DNA glycosylase superfamily [Wolbachia]	AAS13915.1 phage SPO1 DNA polymerase-related protein [Wolbachia endosymbiont of Drosophila melanogaster]	AGJ99574.1 Uracil-DNA glycosylase-like protein [Wolbachia endosymbiont of Drosophila simulans wHa]	ACN94945.1 uracil-DNA glycosylase-like protein [Wolbachia sp. wRi]	AGJ99020.1 uracil-dna glycosylase-like protein [Wolbachia endosymbiont of Drosophila simulans wNo]	CAQ55030.1 putative DNA glycosylase [Wolbachia endosymbiont of Culex quinquefasciatus Pel]	WP_038199682.1 DNA glycosylase [Wolbachia pipientis]	WP_019236845.1 DNA glycosylase [Wolbachia pipientis]	WP_047758982.1 DNA glycosylase [Wolbachia endosymbiont of Armadillidium vulgare]	wFol_08110 wFol_08110 Uracil-DNA glycosylase-like protein 974524_975384 forward MW_32127	OCA06729.1 uracil-DNA glycosylase_ 4 family protein [Wolbachia endosymbiont of Trichogramma pretiosum]	wLcla08090 wLcla08090 Uracil-dna glycosylase-like protein 739813_740586 reverse MW_28854	ONI56796.1 uracil-DNA glycosylase_ family 4 family protein [Wolbachia pipientis wUni]	OEY86730.1 DNA glycosylase [Wolbachia pipientis]		OG0000150	1	1	1	1	1	1	1	1	1	1	1	1	1	1	1	1	1	1		1	0		OG0000150	#DIV/0!	#DIV/0!	#DIV/0!	#DIV/0!	#DIV/0!	#DIV/0!
OG0000151	wOo_00330 wOo_00330 hypothetical protein 25197_25409 reverse MW_8047	WP_014868693.1 MULTISPECIES_ hypothetical protein [Wolbachia]	gi|58584634|ref|YP_198207.1| hypothetical protein Wbm0377 [Wolbachia endosymbiont strain TRS of Brugia malayi]	BAP00535.1 putative uncharacterized protein [Wolbachia endosymbiont of Cimex lectularius]	CDR78473.1 hypothetical protein WPAU_0074 [Wolbachia]	AAS13913.1 conserved hypothetical protein [Wolbachia endosymbiont of Drosophila melanogaster]	AGJ99573.1 hypothetical protein wHa_00770 [Wolbachia endosymbiont of Drosophila simulans wHa]	ACN94946.1 hypothetical protein WRi_000910 [Wolbachia sp. wRi]	AGJ99062.1 hypothetical protein wNo_06510 [Wolbachia endosymbiont of Drosophila simulans wNo]	CAQ55201.1 hypothetical protein WP1093 [Wolbachia endosymbiont of Culex quinquefasciatus Pel]	WP_038199679.1 hypothetical protein [Wolbachia pipientis]	WP_006279675.1 MULTISPECIES_ hypothetical protein [Wolbachia]	WP_017532424.1 hypothetical protein [Wolbachia endosymbiont of Diaphorina citri]	wFol_12620 wFol_12620 Uncharacterized protein 1489583_1489786 forward MW_7777	OCA06388.1 hypothetical protein wTpre_720 [Wolbachia endosymbiont of Trichogramma pretiosum]	wLcla05670 wLcla05670 Uncharacterised protein 527143_527355 reverse MW_7949	ONI56798.1 hypothetical protein N500_0117 [Wolbachia pipientis wUni]	OEY86938.1 hypothetical protein BIY23_00325 [Wolbachia pipientis]		OG0000151	1	1	1	1	1	1	1	1	1	1	1	1	1	1	1	1	1	1		1	0		OG0000151	#DIV/0!	#DIV/0!	#DIV/0!	#DIV/0!	#DIV/0!	#DIV/0!
OG0000152	wOo_00320 wOo_00320 NADH dehydrogenase subunit G 23132_25183 reverse MW_75838	WP_025264230.1 NADH-quinone oxidoreductase subunit G [Wolbachia endosymbiont of Onchocerca volvulus]	gi|58584633|ref|YP_198206.1| NADH_ubiquinone oxidoreductase chain G [Wolbachia endosymbiont strain TRS of Brugia malayi]	BAP00534.1 NADH dehydrogenase gamma subunit [Wolbachia endosymbiont of Cimex lectularius]	CDR78474.1 NADH dehydrogenase subunit G_NADH-quinone oxidoreductase chain 3_NADH dehydrogenase subunit G_Uncharacterized anaerobic dehydrogenase_NADH dehydrogenase _quinone__ G subunit_Molybdopterin oxidoreductase [Wolbachia]	AAS13912.1 NADH dehydrogenase I_ G subunit [Wolbachia endosymbiont of Drosophila melanogaster]	AGJ99572.1 NADH-quinone oxidoreductase subunit G [Wolbachia endosymbiont of Drosophila simulans wHa]	ACN94947.1 NADH dehydrogenase I_ subunit G [Wolbachia sp. wRi]	AGJ99063.1 NADH-quinone oxidoreductase subunit G [Wolbachia endosymbiont of Drosophila simulans wNo]	CAQ55202.1 NADH dehydrogenase I_ G subunit [Wolbachia endosymbiont of Culex quinquefasciatus Pel]	WP_038199702.1 NADH-quinone oxidoreductase subunit G [Wolbachia pipientis]	WP_007302472.1 MULTISPECIES_ NADH-quinone oxidoreductase subunit G [Wolbachia]	WP_047759850.1 NADH dehydrogenase [Wolbachia endosymbiont of Armadillidium vulgare]	wFol_12630 nuoG NADH-quinone oxidoreductase 1489797_1491845 forward MW_75551	OCA06387.1 NADH dehydrogenase _quinone__ G subunit [Wolbachia endosymbiont of Trichogramma pretiosum]	wLcla05660 nuoG NADH-quinone oxidoreductase 525089_527158 reverse MW_76268	ONI56799.1 NADH dehydrogenase _quinone__ G subunit [Wolbachia pipientis wUni]	OEY86937.1 NADH-quinone oxidoreductase subunit G [Wolbachia pipientis]		OG0000152	1	1	1	1	1	1	1	1	1	1	1	1	1	1	1	1	1	1		1	0		OG0000152	#DIV/0!	#DIV/0!	#DIV/0!	#DIV/0!	#DIV/0!	#DIV/0!
OG0000153	wOo_00310 wOo_00310 NADH dehydrogenase subunit H 22123_23148 reverse MW_37986	WP_025264229.1 NADH-quinone oxidoreductase subunit H [Wolbachia endosymbiont of Onchocerca volvulus]	gi|58584632|ref|YP_198205.1| NADH_ubiquinone oxidoreductase chain H [Wolbachia endosymbiont strain TRS of Brugia malayi]	BAP00533.1 NADH dehydrogenase subunit H [Wolbachia endosymbiont of Cimex lectularius]	CDR78475.1 NADH dehydrogenase subunit H_NADH-quinone oxidoreductase subunit H_NADH_ubiquinone oxidoreductase subunit H_NADH dehydrogenase [Wolbachia]	AAS13911.1 NADH dehydrogenase I_ H subunit_ putative [Wolbachia endosymbiont of Drosophila melanogaster]	AGJ99571.1 NADH-quinone oxidoreductase subunit H [Wolbachia endosymbiont of Drosophila simulans wHa]	ACN94948.1 NADH dehydrogenase I_ subunit H [Wolbachia sp. wRi]	AGJ99064.1 NADH-quinone oxidoreductase subunit H [Wolbachia endosymbiont of Drosophila simulans wNo]	CAQ55204.1 NADH dehydrogenase I_ H subunit [Wolbachia endosymbiont of Culex quinquefasciatus Pel]	WP_038199678.1 NADH-quinone oxidoreductase subunit H [Wolbachia pipientis]	WP_007302473.1 MULTISPECIES_ NADH-quinone oxidoreductase subunit H [Wolbachia]	WP_047759742.1 NADH_ubiquinone oxidoreductase subunit H [Wolbachia endosymbiont of Armadillidium vulgare]	wFol_12650 nuoH NADH-quinone oxidoreductase subunit H 1492424_1493446 forward MW_37962	OCA06385.1 NADH-ubiquinone oxidoreductase chain 1 [Wolbachia endosymbiont of Trichogramma pretiosum]	wLcla05640 nuoH NADH-quinone oxidoreductase subunit H 523647_524672 reverse MW_38045	ONI56800.1 NADH dehydrogenase family protein [Wolbachia pipientis wUni]	OEY86936.1 NADH-quinone oxidoreductase subunit H [Wolbachia pipientis]		OG0000153	1	1	1	1	1	1	1	1	1	1	1	1	1	1	1	1	1	1		1	0		OG0000153	#DIV/0!	#DIV/0!	#DIV/0!	#DIV/0!	#DIV/0!	#DIV/0!
OG0000154	wOo_08340 wOo_08340 delta-aminolevulinic acid dehydratase 754507_755511 forward MW_37150	WP_014869164.1 MULTISPECIES_ delta-aminolevulinic acid dehydratase [Wolbachia]	gi|58584630|ref|YP_198203.1| Delta-aminolevulinic acid dehydratase [Wolbachia endosymbiont strain TRS of Brugia malayi]	BAO99490.1 porphobilinogen synthase [Wolbachia endosymbiont of Cimex lectularius]	CDR78476.1 delta-aminolevulinic acid dehydratase_Delta-aminolevulinic acid dehydratase_delta-aminolevulinic acid dehydratase_Delta-aminolevulinic acid dehydratase_Delta-aminolevulinic acid dehydratase [Wolbachia]	AAS13910.1 delta-aminolevulinic acid dehydratase [Wolbachia endosymbiont of Drosophila melanogaster]	AGJ99570.1 Delta-aminolevulinic acid dehydratase [Wolbachia endosymbiont of Drosophila simulans wHa]	ACN94949.1 delta-aminolevulinic acid dehydratase [Wolbachia sp. wRi]	AGJ99065.1 Delta-aminolevulinic acid dehydratase [Wolbachia endosymbiont of Drosophila simulans wNo]	CAQ55205.1 delta-aminolevulinic acid dehydratase [Wolbachia endosymbiont of Culex quinquefasciatus Pel]	WP_038199675.1 delta-aminolevulinic acid dehydratase [Wolbachia pipientis]	WP_007302474.1 MULTISPECIES_ delta-aminolevulinic acid dehydratase [Wolbachia]	WP_047759741.1 delta-aminolevulinic acid dehydratase [Wolbachia endosymbiont of Armadillidium vulgare]	wFol_12670 hemB Delta-aminolevulinic acid dehydratase 1495185_1496174 forward MW_36366	OCA06384.1 delta-aminolevulinic acid dehydratase family protein [Wolbachia endosymbiont of Trichogramma pretiosum]	wLcla05630 hemB Delta-aminolevulinic acid dehydratase 522632_523654 reverse MW_37733	ONI56801.1 delta-aminolevulinic acid dehydratase [Wolbachia pipientis wUni]	OEY86813.1 delta-aminolevulinic acid dehydratase [Wolbachia pipientis]		OG0000154	1	1	1	1	1	1	1	1	1	1	1	1	1	1	1	1	1	1		1	0		OG0000154	#DIV/0!	#DIV/0!	#DIV/0!	#DIV/0!	#DIV/0!	#DIV/0!
OG0000155	wOo_01020 wOo_01020 phosphatidylglycerophosphatase A PgpA 84597_85343 reverse MW_28120	WP_025264256.1 phosphatidylglycerophosphatase [Wolbachia endosymbiont of Onchocerca volvulus]	gi|58584626|ref|YP_198199.1| Phosphatidylglycerophosphatase A_ PgpA [Wolbachia endosymbiont strain TRS of Brugia malayi]	BAO99478.1 putative membrane protein [Wolbachia endosymbiont of Cimex lectularius]	CDR78477.1 phosphatidylglycerophosphatase A_ PgpA [Wolbachia]	AAS13909.1 hypothetical protein WD_0157 [Wolbachia endosymbiont of Drosophila melanogaster]	AGJ99569.1 hypothetical protein wHa_00730 [Wolbachia endosymbiont of Drosophila simulans wHa]	ACN94950.1 hypothetical protein WRi_000950 [Wolbachia sp. wRi]	AGJ99066.1 Putative membrane protein [Wolbachia endosymbiont of Drosophila simulans wNo]	CAQ55231.1 Putative membrane protein [Wolbachia endosymbiont of Culex quinquefasciatus Pel]	WP_038199673.1 phosphatidylglycerophosphatase [Wolbachia pipientis]	WP_019236900.1 phosphatidylglycerophosphatase A [Wolbachia pipientis]	WP_047759792.1 phosphatidylglycerophosphatase [Wolbachia endosymbiont of Armadillidium vulgare]	wFol_14510 wFol_14510 Putative phosphatidylglycerophosphatase 1732841_1733587 reverse MW_27808	OCA06382.1 putative membrane protein [Wolbachia endosymbiont of Trichogramma pretiosum]	wLcla05620 wLcla05620 Putative membrane protein 521228_521986 reverse MW_28665	ONI56802.1 phosphatidylglycerophosphatase A_ PgpA [Wolbachia pipientis wUni]	OEY86443.1 phosphatidylglycerophosphatase [Wolbachia pipientis]		OG0000155	1	1	1	1	1	1	1	1	1	1	1	1	1	1	1	1	1	1		1	0		OG0000155	#DIV/0!	#DIV/0!	#DIV/0!	#DIV/0!	#DIV/0!	#DIV/0!
OG0000156	wOo_01010 wOo_01010 glycyl-tRNA synthetase subunit alpha 83700_84539 reverse MW_31542	WP_014868736.1 MULTISPECIES_ glycine--tRNA ligase subunit alpha [Wolbachia]	gi|58584627|ref|YP_198200.1| Glycyl-tRNA synthetase_ alpha subunit [Wolbachia endosymbiont strain TRS of Brugia malayi]	BAO99479.1 glycyl-tRNA synthetase alpha subunit [Wolbachia endosymbiont of Cimex lectularius]	CDR78478.1 glycyl-tRNA synthetase subunit alpha_Glycine--tRNA ligase alpha subunit_glycyl-tRNA synthetase subunit alpha_glycine--tRNA ligase_ alpha subunit_Glycyl-tRNA synthetase alpha subunit [Wolbachia]	AAS13908.1 glycyl-tRNA synthetase_ alpha subunit [Wolbachia endosymbiont of Drosophila melanogaster]	AGJ99568.1 Glycyl-tRNA synthetase_ alpha subunit [Wolbachia endosymbiont of Drosophila simulans wHa]	ACN94951.1 glycyl-tRNA synthetase_ alpha subunit [Wolbachia sp. wRi]	AGJ99067.1 Glycyl-tRNA synthetase_ alpha subunit [Wolbachia endosymbiont of Drosophila simulans wNo]	CAQ55230.1 glycyl-tRNA synthetase_ alpha subunit [Wolbachia endosymbiont of Culex quinquefasciatus Pel]	WP_038199672.1 glycine--tRNA ligase subunit alpha [Wolbachia pipientis]	WP_019236899.1 glycine--tRNA ligase subunit alpha [Wolbachia pipientis]	WP_047759791.1 glycyl-tRNA synthetase subunit alpha [Wolbachia endosymbiont of Armadillidium vulgare]	wFol_14500 glyQ Glycine--tRNA ligase alpha subunit 1731945_1732784 reverse MW_31660	OCA06381.1 glycine--tRNA ligase_ alpha subunit [Wolbachia endosymbiont of Trichogramma pretiosum]	wLcla05610 glyQ Glycine--tRNA ligase alpha subunit 520344_521183 reverse MW_31542	ONI56803.1 glycyl-tRNA synthetase_ alpha subunit [Wolbachia pipientis wUni]	OEY86442.1 glycine--tRNA ligase subunit alpha [Wolbachia pipientis]		OG0000156	1	1	1	1	1	1	1	1	1	1	1	1	1	1	1	1	1	1		1	0		OG0000156	#DIV/0!	#DIV/0!	#DIV/0!	#DIV/0!	#DIV/0!	#DIV/0!
OG0000157	wOo_01000 wOo_01000 glycyl-tRNA synthetase beta subunit 81897_83696 reverse MW_68229	WP_025264255.1 glycine--tRNA ligase subunit beta [Wolbachia endosymbiont of Onchocerca volvulus]	gi|58584628|ref|YP_198201.1| Glycyl-tRNA synthetase_ beta subunit [Wolbachia endosymbiont strain TRS of Brugia malayi]	BAO99480.1 glycyl-tRNA synthetase beta subunit [Wolbachia endosymbiont of Cimex lectularius]	CDR78479.1 glycyl-tRNA synthetase_ beta subunit_Glycine--tRNA ligase beta subunit_glycyl-tRNA synthetase subunit beta_glycine--tRNA ligase_ beta subunit_Glycyl-tRNA synthetase beta subunit [Wolbachia]	AAS13907.1 glycyl-tRNA synthetase_ beta subunit [Wolbachia endosymbiont of Drosophila melanogaster]	AGJ99567.1 Glycyl-tRNA synthetase_ beta subunit [Wolbachia endosymbiont of Drosophila simulans wHa]	ACN94952.1 glycyl-tRNA synthetase_ beta subunit [Wolbachia sp. wRi]	AGJ99068.1 Glycyl-tRNA synthetase_ beta subunit [Wolbachia endosymbiont of Drosophila simulans wNo]	CAQ55229.1 glycyl-tRNA synthetase_ beta subunit [Wolbachia endosymbiont of Culex quinquefasciatus Pel]	WP_038199670.1 glycine--tRNA ligase subunit beta [Wolbachia pipientis]	WP_019236898.1 glycine--tRNA ligase subunit beta [Wolbachia pipientis]	WP_047759790.1 glycyl-tRNA synthetase subunit beta [Wolbachia endosymbiont of Armadillidium vulgare]	wFol_14490 glyS Glycine--tRNA ligase beta subunit 1729832_1731943 reverse MW_79721	OCA06380.1 glycine--tRNA ligase_ beta subunit [Wolbachia endosymbiont of Trichogramma pretiosum]	wLcla05600 glyS Glycine--tRNA ligase beta subunit 518232_520340 reverse MW_79958	ONI56804.1 glycyl-tRNA synthetase_ beta subunit [Wolbachia pipientis wUni]	OEY86441.1 glycine--tRNA ligase subunit beta [Wolbachia pipientis]		OG0000157	1	1	1	1	1	1	1	1	1	1	1	1	1	1	1	1	1	1		1	0		OG0000157	#DIV/0!	#DIV/0!	#DIV/0!	#DIV/0!	#DIV/0!	#DIV/0!
OG0000158	wOo_00730 wOo_00730 cysteinyl-tRNA synthetase 60215_61588 forward MW_52681	WP_025264249.1 cysteine--tRNA ligase [Wolbachia endosymbiont of Onchocerca volvulus]	gi|58584937|ref|YP_198510.1| Cysteinyl-tRNA synthetase [Wolbachia endosymbiont strain TRS of Brugia malayi]	BAO99859.1 cysteinyl-tRNA synthetase [Wolbachia endosymbiont of Cimex lectularius]	CDR78485.1 cysteinyl-tRNA synthetase_Cysteine--tRNA ligase_cysteinyl-tRNA synthetase_Cysteinyl-tRNA synthetase_cysteine--tRNA ligase_tRNA synthetases class I _C_ catalytic domain [Wolbachia]	AAS13901.1 cysteinyl-tRNA synthetase [Wolbachia endosymbiont of Drosophila melanogaster]	AGJ99561.1 Cysteinyl-tRNA synthetase [Wolbachia endosymbiont of Drosophila simulans wHa]	ACN94958.1 Cysteinyl-tRNA synthetase [Wolbachia sp. wRi]	AGJ98506.1 Cysteinyl-tRNA synthetase [Wolbachia endosymbiont of Drosophila simulans wNo]	CAQ54186.1 cysteinyl-tRNA synthetase [Wolbachia endosymbiont of Culex quinquefasciatus Pel]	WP_038199507.1 cysteine--tRNA ligase [Wolbachia pipientis]	WP_007302766.1 MULTISPECIES_ cysteine--tRNA ligase [Wolbachia]	WP_047758946.1 cysteinyl-tRNA synthetase [Wolbachia endosymbiont of Armadillidium vulgare]	wFol_07670 cysS Cysteine--tRNA ligase 909983_911356 reverse MW_52483	OCA05950.1 cysteine--tRNA ligase [Wolbachia endosymbiont of Trichogramma pretiosum]	wLcla02420 cysS Cysteine--tRNA ligase 215667_217061 reverse MW_53377	ONI56783.1 cysteinyl-tRNA synthetase [Wolbachia pipientis wUni]	OEY86372.1 cysteine--tRNA ligase [Wolbachia pipientis]		OG0000158	1	1	1	1	1	1	1	1	1	1	1	1	1	1	1	1	1	1		1	0		OG0000158	#DIV/0!	#DIV/0!	#DIV/0!	#DIV/0!	#DIV/0!	#DIV/0!
OG0000159	wOo_09010 wOo_09010 aspartylglutamyl-tRNA amidotransferase subunit B 813939_815363 reverse MW_53491	WP_025264141.1 aspartyl/glutamyl-tRNA amidotransferase subunit B [Wolbachia endosymbiont of Onchocerca volvulus]	gi|58584961|ref|YP_198534.1| Asp-tRNAAsn/Glu-tRNAGln amidotransferase B subunit [Wolbachia endosymbiont strain TRS of Brugia malayi]	BAP00354.1 aspartyl/glutamyl-tRNA amidotransferase subunit B [Wolbachia endosymbiont of Cimex lectularius]	CDR78488.1 aspartyl/glutamyl-tRNA amidotransferase subunit B_Aspartyl/glutamyl-tRNA_Asn/Gln_ amidotransferase subunit B_aspartyl/glutamyl-tRNA amidotransferase subunit B_aspartyl/glutamyl-tRNA_Asn/Gln_ amidotransferase_ B subunit_GatB/GatE catalytic domain [Wolbachia]	AAS13898.1 glutamyl-tRNA_Gln_ amidotransferase_ B subunit [Wolbachia endosymbiont of Drosophila melanogaster]	AGJ99558.1 Aspartyl/glutamyl-tRNA_Asn/Gln_ amidotransferase subunit B [Wolbachia endosymbiont of Drosophila simulans wHa]	ACN94961.1 aspartyl/glutamyl-tRNA amidotransferase subunit B [Wolbachia sp. wRi]	AGJ98496.1 Aspartyl/glutamyl-tRNA_Asn/Gln_ amidotransferase subunit B [Wolbachia endosymbiont of Drosophila simulans wNo]	CAQ54196.1 glutamyl-tRNA_Gln_ amidotransferase_ B subunit [Wolbachia endosymbiont of Culex quinquefasciatus Pel]	WP_010962393.1 MULTISPECIES_ aspartyl/glutamyl-tRNA_Asn/Gln_ amidotransferase subunit B [Wolbachia]	WP_007302757.1 MULTISPECIES_ aspartyl/glutamyl-tRNA_Asn/Gln_ amidotransferase subunit B [Wolbachia]	WP_047758955.1 glutamyl-tRNA amidotransferase [Wolbachia endosymbiont of Armadillidium vulgare]	wFol_02580 gatB Aspartyl/glutamyl-tRNA_Asn/Gln_ amidotransferase subunit B 303016_304440 forward MW_53664	OCA05939.1 aspartyl/glutamyl-tRNA_Asn/Gln_ amidotransferase_ B subunit [Wolbachia endosymbiont of Trichogramma pretiosum]	wLcla02320 gatB Aspartyl/glutamyl-tRNA_Asn/Gln_ amidotransferase subunit B 203188_204618 reverse MW_53547	ONI56779.1 glutamyl-tRNA_Gln_ and/or aspartyl-tRNA_Asn_ amidotransferase_ B subunit [Wolbachia pipientis wUni]	OEY86595.1 aspartyl/glutamyl-tRNA amidotransferase subunit B [Wolbachia pipientis]		OG0000159	1	1	1	1	1	1	1	1	1	1	1	1	1	1	1	1	1	1		1	0		OG0000159	#DIV/0!	#DIV/0!	#DIV/0!	#DIV/0!	#DIV/0!	#DIV/0!
OG0000160	wOo_00950 wOo_00950 endonuclease 79157_79624 forward MW_17676	WP_025264254.1 Holliday junction DNA helicase [Wolbachia endosymbiont of Onchocerca volvulus]	gi|58584953|ref|YP_198526.1| Predicted endonuclease involved in recombination_ RNase H fold_ yqgF family [Wolbachia endosymbiont strain TRS of Brugia malayi]	BAO99915.1 predicted endonuclease involved in recombination [Wolbachia endosymbiont of Cimex lectularius]	CDR78489.1 putative holliday junction resolvase_Putative Holliday junction resolvase_Holliday junction resolvase-like protein_RNAse H domain protein_ YqgF family_Uncharacterised protein family _UPF0081_ [Wolbachia]	AAS13897.1 conserved hypothetical protein TIGR00250 [Wolbachia endosymbiont of Drosophila melanogaster]	AGJ99557.1 Putative Holliday junction resolvase [Wolbachia endosymbiont of Drosophila simulans wHa]	ACN94964.1 putative holliday junction resolvase [Wolbachia sp. wRi]	AGJ99201.1 Putative Holliday junction resolvase [Wolbachia endosymbiont of Drosophila simulans wNo]	CAQ55258.1 putative holliday junction resolvase [Wolbachia endosymbiont of Culex quinquefasciatus Pel]	WP_010082183.1 MULTISPECIES_ Holliday junction DNA helicase [Wolbachia]	WP_019236914.1 MULTISPECIES_ Holliday junction DNA helicase [Wolbachia]	WP_047759291.1 Holliday junction resolvase [Wolbachia endosymbiont of Armadillidium vulgare]	wFol_02460 wFol_02460 Putative pre-16S rRNA nuclease 287240_287707 reverse MW_17467	OCA06322.1 hypothetical protein wTpre_652 [Wolbachia endosymbiont of Trichogramma pretiosum]	wLcla05200 wLcla05200 Holliday junction resolvase 472019_472486 forward MW_17668	ONI56773.1 hypothetical protein N500_0135 [Wolbachia pipientis wUni]	OEY87199.1 Holliday junction resolvase [Wolbachia pipientis]		OG0000160	1	1	1	1	1	1	1	1	1	1	1	1	1	1	1	1	1	1		1	0		OG0000160	#DIV/0!	#DIV/0!	#DIV/0!	#DIV/0!	#DIV/0!	#DIV/0!
OG0000161	wOo_08890 wOo_08890 cytochrome c oxidase subunit 3 806382_807209 reverse MW_31891	WP_025264140.1 cytochrome c oxidase subunit III [Wolbachia endosymbiont of Onchocerca volvulus]	gi|58584955|ref|YP_198528.1| Cytochrome c oxidase_ subunit 3 [Wolbachia endosymbiont strain TRS of Brugia malayi]	BAO99833.1 cytochrome c oxidase subunit III [Wolbachia endosymbiont of Cimex lectularius]	CDR78491.1 cytochrome c oxidase subunit III_Cytochrome c oxidase subunit 3_cytochrome o ubiquinol oxidase subunit III_cytochrome o ubiquinol oxidase_ subunit III_Cytochrome c oxidase subunit III [Wolbachia]	AAS13895.1 cytochrome c oxidase_ subunit III [Wolbachia endosymbiont of Drosophila melanogaster]	AGJ99555.1 Cytochrome c oxidase subunit 3 [Wolbachia endosymbiont of Drosophila simulans wHa]	ACN94966.1 cytochrome c oxidase_ subunit III [Wolbachia sp. wRi]	AGJ99199.1 Cytochrome c oxidase_ subunit III [Wolbachia endosymbiont of Drosophila simulans wNo]	CAQ55253.1 cytochrome c oxidase_ subunit III [Wolbachia endosymbiont of Culex quinquefasciatus Pel]	WP_006279354.1 MULTISPECIES_ cytochrome c oxidase subunit III [Wolbachia]	WP_019236912.1 MULTISPECIES_ cytochrome c oxidase subunit III [Wolbachia]	WP_047759293.1 cytochrome C oxidase subunit III [Wolbachia endosymbiont of Armadillidium vulgare]	wFol_11720 coxC Cytochrome c oxidase_ subunit III 1388884_1389711 reverse MW_31826	OCA06324.1 cytochrome c oxidase subunit III family protein [Wolbachia endosymbiont of Trichogramma pretiosum]	wLcla05220 coxC Cytochrome c oxidase_ subunit III 473001_473828 reverse MW_31797	ONI56775.1 cytochrome c oxidase subunit III family protein [Wolbachia pipientis wUni]	OEY86545.1 cytochrome C oxidase subunit III [Wolbachia pipientis]		OG0000161	1	1	1	1	1	1	1	1	1	1	1	1	1	1	1	1	1	1		1	0		OG0000161	#DIV/0!	#DIV/0!	#DIV/0!	#DIV/0!	#DIV/0!	#DIV/0!
OG0000162	wOo_08960 wOo_08960 50S ribosomal protein L27 812088_812357 reverse MW_9654	WP_014869202.1 MULTISPECIES_ 50S ribosomal protein L27 [Wolbachia]	gi|58584957|ref|YP_198530.1| Ribosomal protein L27 [Wolbachia endosymbiont strain TRS of Brugia malayi]	BAO99932.1 50S ribosomal protein L27 [Wolbachia endosymbiont of Cimex lectularius]	CDR78497.1 50S ribosomal protein L27_RRP-L27_50S ribosomal protein L27_Ribosomal protein L27_ribosomal protein L27_Ribosomal L27 protein [Wolbachia]	AAS13889.1 ribosomal protein L27 [Wolbachia endosymbiont of Drosophila melanogaster]	AGJ99551.1 50S ribosomal protein L27 [Wolbachia endosymbiont of Drosophila simulans wHa]	ACN94970.1 ribosomal protein L27 [Wolbachia sp. wRi]	AGJ99195.1 50S ribosomal protein L27 [Wolbachia endosymbiont of Drosophila simulans wNo]	CAQ55249.1 ribosomal protein L27 [Wolbachia endosymbiont of Culex quinquefasciatus Pel]	WP_010082252.1 50S ribosomal protein L27 [Wolbachia pipientis]	WP_006012184.1 MULTISPECIES_ 50S ribosomal protein L27 [Wolbachia]	WP_047759296.1 50S ribosomal protein L27 [Wolbachia endosymbiont of Armadillidium vulgare]	wFol_02630 rpmA 50S ribosomal protein L27 309377_309649 forward MW_9682	OCA06334.1 ribosomal protein L27 [Wolbachia endosymbiont of Trichogramma pretiosum]	wLcla05260 rpmA 50S ribosomal protein L27 476642_476911 reverse MW_9602	ONI56771.1 ribosomal protein L27 [Wolbachia pipientis wUni]	OEY86827.1 50S ribosomal protein L27 [Wolbachia pipientis]		OG0000162	1	1	1	1	1	1	1	1	1	1	1	1	1	1	1	1	1	1		1	0		OG0000162	#DIV/0!	#DIV/0!	#DIV/0!	#DIV/0!	#DIV/0!	#DIV/0!
OG0000163	wOo_08970 wOo_08970 50S ribosomal protein L21 812361_812669 reverse MW_11851	WP_014869203.1 MULTISPECIES_ 50S ribosomal protein L21 [Wolbachia]	gi|58584958|ref|YP_198531.1| Ribosomal protein L21 [Wolbachia endosymbiont strain TRS of Brugia malayi]	BAO99931.1 ribosomal protein L21 [Wolbachia endosymbiont of Cimex lectularius]	CDR78498.1 50S ribosomal protein L21_50S ribosomal protein L21_50S ribosomal protein L21_ribosomal protein L21_Ribosomal prokaryotic L21 protein [Wolbachia]	AAS13888.1 ribosomal protein L21 [Wolbachia endosymbiont of Drosophila melanogaster]	AGJ99550.1 50S ribosomal protein L21 [Wolbachia endosymbiont of Drosophila simulans wHa]	ACN94971.1 ribosomal protein L21 [Wolbachia sp. wRi]	AGJ99194.1 50S ribosomal protein L21 [Wolbachia endosymbiont of Drosophila simulans wNo]	CAQ55248.1 ribosomal protein L21 [Wolbachia endosymbiont of Culex quinquefasciatus Pel]	WP_010082251.1 MULTISPECIES_ 50S ribosomal protein L21 [Wolbachia]	WP_007302510.1 MULTISPECIES_ 50S ribosomal protein L21 [Wolbachia]	WP_047759297.1 50S ribosomal protein L21 [Wolbachia endosymbiont of Armadillidium vulgare]	wFol_02620 rplU 50S ribosomal protein L21 309064_309366 forward MW_11487	OCA06335.1 ribosomal protein L21 [Wolbachia endosymbiont of Trichogramma pretiosum]	wLcla05270 rplU 50S ribosomal protein L21 476922_477224 reverse MW_11606	ONI56772.1 ribosomal protein L21 [Wolbachia pipientis wUni]	OEY86826.1 50S ribosomal protein L21 [Wolbachia pipientis]		OG0000163	1	1	1	1	1	1	1	1	1	1	1	1	1	1	1	1	1	1		1	0		OG0000163	#DIV/0!	#DIV/0!	#DIV/0!	#DIV/0!	#DIV/0!	#DIV/0!
OG0000164	wOo_01940 wOo_01940 phenylalanyl-tRNA synthetase alpha subunit 176521_177564 reverse MW_40095	WP_025264295.1 phenylalanine--tRNA ligase subunit alpha [Wolbachia endosymbiont of Onchocerca volvulus]	gi|58584348|ref|YP_197921.1| Phenylalanyl-tRNA synthetase alpha subunit [Wolbachia endosymbiont strain TRS of Brugia malayi]	BAP00126.1 phenylalanyl-tRNA synthetase alpha subunit [Wolbachia endosymbiont of Cimex lectularius]	CDR78500.1 phenylalanyl-tRNA synthetase subunit alpha_Phenylalanine--tRNA ligase alpha subunit_phenylalanyl-tRNA synthetase subunit alpha_Phenylalanyl-tRNA synthetase alpha subunit_phenylalanine--tRNA ligase_ alpha subunit_tRNA synthetases class II core domain _F_ [Wolbachia]	AAS13886.1 phenylalanyl-tRNA synthetase_ alpha subunit [Wolbachia endosymbiont of Drosophila melanogaster]	AGJ99596.1 Phenylalanyl-tRNA synthetase alpha chain [Wolbachia endosymbiont of Drosophila simulans wHa]	ACN94973.1 phenylalanyl-tRNA synthetase_ alpha subunit [Wolbachia sp. wRi]	AGJ99190.1 Phenylalanyl-tRNA synthetase alpha chain [Wolbachia endosymbiont of Drosophila simulans wNo]	CAQ55243.1 phenylalanyl-tRNA synthetase_ alpha subunit [Wolbachia endosymbiont of Culex quinquefasciatus Pel]	WP_010082249.1 phenylalanine--tRNA ligase subunit alpha [Wolbachia pipientis]	WP_019236907.1 phenylalanine--tRNA ligase subunit alpha [Wolbachia pipientis]	WP_047759300.1 phenylalanyl-tRNA synthetase subunit alpha [Wolbachia endosymbiont of Armadillidium vulgare]	wFol_12860 pheS Phenylalanine--tRNA ligase subunit alpha 1525174_1526217 reverse MW_39843	OCA06338.1 phenylalanine--tRNA ligase_ alpha subunit [Wolbachia endosymbiont of Trichogramma pretiosum]	wLcla05300 pheS Phenylalanine--tRNA ligase alpha subunit 479215_480258 reverse MW_39923	ONI56767.1 tRNA synthetases class II core domain family protein_ partial [Wolbachia pipientis wUni]	OEY86848.1 phenylalanine--tRNA ligase subunit alpha [Wolbachia pipientis]		OG0000164	1	1	1	1	1	1	1	1	1	1	1	1	1	1	1	1	1	1		1	0		OG0000164	#DIV/0!	#DIV/0!	#DIV/0!	#DIV/0!	#DIV/0!	#DIV/0!
OG0000165	wOo_01980 wOo_01980 hypothetical protein 179988_180578 forward MW_22914	WP_014868795.1 MULTISPECIES_ hypothetical protein [Wolbachia]	gi|58584343|ref|YP_197916.1| Uncharacterized membrane protein_ required for colicin V production_ CvpA [Wolbachia endosymbiont strain TRS of Brugia malayi]	BAP00261.1 membrane protein CvpA putative [Wolbachia endosymbiont of Cimex lectularius]	CDR78503.1 membrane protein CvpA_ putative_colicin V production protein_Colicin V production protein [Wolbachia]	AAS13883.1 membrane protein CvpA_ putative [Wolbachia endosymbiont of Drosophila melanogaster]	AGJ99599.1 Membrane protein CvpA_ putative [Wolbachia endosymbiont of Drosophila simulans wHa]	ACN94976.1 membrane protein CvpA_ putative [Wolbachia sp. wRi]	AGJ99187.1 Membrane protein CvpA [Wolbachia endosymbiont of Drosophila simulans wNo]	CAQ55240.1 membrane protein CvpA [Wolbachia endosymbiont of Culex quinquefasciatus Pel]	WP_038199490.1 hypothetical protein [Wolbachia pipientis]	WP_026097267.1 hypothetical protein [Wolbachia pipientis]	WP_047758872.1 CvpA family protein [Wolbachia endosymbiont of Armadillidium vulgare]	wFol_11300 wFol_11300 Putative membrane protein CvpA 1349032_1349622 forward MW_22684	OCA06344.1 colicin V production family protein [Wolbachia endosymbiont of Trichogramma pretiosum]	wLcla05350 cvpA Membrane protein CvpA_ putative 483337_483924 forward MW_22663	ONI56756.1 hypothetical protein N500_0149 [Wolbachia pipientis wUni]	OEY86631.1 CvpA family protein [Wolbachia pipientis]		OG0000165	1	1	1	1	1	1	1	1	1	1	1	1	1	1	1	1	1	1		1	0		OG0000165	#DIV/0!	#DIV/0!	#DIV/0!	#DIV/0!	#DIV/0!	#DIV/0!
OG0000166	wOo_03790 wOo_03790 DNA segregation ATPase FtsK 325607_327730 forward MW_78962	WP_025264373.1 cell division protein FtsK [Wolbachia endosymbiont of Onchocerca volvulus]	gi|58584901|ref|YP_198474.1| DNA segregation ATPase FtsK [Wolbachia endosymbiont strain TRS of Brugia malayi]	BAO99952.1 DNA segregation ATPase FtsK [Wolbachia endosymbiont of Cimex lectularius]	CDR78510.1 DNA translocase FtsK_DNA translocase FtsK_DNA translocase FtsK_DNA segregation ATPase FtsK/SpoIIIE and related proteins_type VII secretion protein EssC_FtsK/SpoIIIE family [Wolbachia]	AAS13874.1 cell division protein FtsK_ putative [Wolbachia endosymbiont of Drosophila melanogaster]	AGJ99604.1 Cell division protein FtsK_ putative [Wolbachia endosymbiont of Drosophila simulans wHa]	ACN94980.1 cell division protein FtsK_ putative [Wolbachia sp. wRi]	AGJ99339.1 Putative cell division protein FtsK [Wolbachia endosymbiont of Drosophila simulans wNo]	CAQ54307.1 Putative cell division protein FtsK [Wolbachia endosymbiont of Culex quinquefasciatus Pel]	WP_010962378.1 MULTISPECIES_ cell division protein FtsK [Wolbachia]	WP_012481755.1 MULTISPECIES_ cell division protein FtsK [Wolbachia]	WP_047758808.1 cell division protein FtsK [Wolbachia endosymbiont of Armadillidium vulgare]	wFol_06960 ftsK Cell division protein FtsK 826659_828779 reverse MW_79261	OCA06173.1 ftsK/SpoIIIE family protein [Wolbachia endosymbiont of Trichogramma pretiosum]	wLcla04490 wLcla04490 Putative cell division protein FtsK 394188_396296 forward MW_78528	ONI56762.1 ftsK/SpoIIIE family protein [Wolbachia pipientis wUni]	OEY86835.1 cell division protein FtsK [Wolbachia pipientis]		OG0000166	1	1	1	1	1	1	1	1	1	1	1	1	1	1	1	1	1	1		1	0		OG0000166	#DIV/0!	#DIV/0!	#DIV/0!	#DIV/0!	#DIV/0!	#DIV/0!
OG0000167	wOo_01100 wOo_01100 DNA gyrase topoisomerase II B subunit GyrB 91530_93902 reverse MW_88906	WP_025264260.1 DNA gyrase subunit B [Wolbachia endosymbiont of Onchocerca volvulus]	gi|58585021|ref|YP_198594.1| DNA gyrase_ topoisomerase II_ B subunit_ GyrB [Wolbachia endosymbiont strain TRS of Brugia malayi]	BAO99592.1 DNA gyrase topoisomerase II B subunit [Wolbachia endosymbiont of Cimex lectularius]	CDR78517.1 DNA gyrase_ B subunit_DNA gyrase subunit B_DNA gyrase subunit B_Type IIA topoisomerase _DNA gyrase/topo II_ topoisomerase IV__ A subunit_DNA gyrase_ B subunit_DNA gyrase B [Wolbachia]	AAS13867.1 DNA gyrase_ B subunit [Wolbachia endosymbiont of Drosophila melanogaster]	AGJ99609.1 DNA gyrase subunit B [Wolbachia endosymbiont of Drosophila simulans wHa]	ACN94988.1 DNA gyrase_ B subunit [Wolbachia sp. wRi]	AGJ99178.1 DNA gyrase subunit B [Wolbachia endosymbiont of Drosophila simulans wNo]	CAQ55211.1 DNA gyrase_ B subunit [Wolbachia endosymbiont of Culex quinquefasciatus Pel]	WP_038199473.1 DNA gyrase subunit B [Wolbachia pipientis]	WP_007302477.1 MULTISPECIES_ DNA gyrase subunit B [Wolbachia]	WP_047759780.1 DNA gyrase subunit B [Wolbachia endosymbiont of Armadillidium vulgare]	wFol_08830 gyrB DNA gyrase subunit B 1053356_1055740 forward MW_88248	OCA06358.1 DNA gyrase_ B subunit [Wolbachia endosymbiont of Trichogramma pretiosum]	wLcla05450 gyrB DNA gyrase subunit B 496904_499276 reverse MW_88574	ONI56722.1 DNA gyrase_ B subunit [Wolbachia pipientis wUni]	OEY87092.1 DNA gyrase subunit B [Wolbachia pipientis]		OG0000167	1	1	1	1	1	1	1	1	1	1	1	1	1	1	1	1	1	1		1	0		OG0000167	#DIV/0!	#DIV/0!	#DIV/0!	#DIV/0!	#DIV/0!	#DIV/0!
OG0000168	wOo_09320 wOo_09320 DNA polymerase III epsilon subunit 842755_843450 forward MW_26688	WP_014869228.1 MULTISPECIES_ DNA polymerase III subunit epsilon [Wolbachia]	gi|58584800|ref|YP_198373.1| DNA polymerase III epsilon subunit [Wolbachia endosymbiont strain TRS of Brugia malayi]	BAO99814.1 DNA polymerase III epsilon subunit [Wolbachia endosymbiont of Cimex lectularius]	CDR78519.1 DNA polymerase III subunit epsilon_DNA polymerase III subunit epsilon_DNA polymerase III subunit epsilon_DNA polymerase III_ epsilon subunit_Exonuclease [Wolbachia]	AAS13863.1 DNA polymerase III_ epsilon subunit [Wolbachia endosymbiont of Drosophila melanogaster]	AGJ99611.1 DNA polymerase III_ epsilon subunit [Wolbachia endosymbiont of Drosophila simulans wHa]	ACN94990.1 DNA polymerase III_ epsilon subunit [Wolbachia sp. wRi]	AGJ99055.1 DNA polymerase III_ epsilon subunit [Wolbachia endosymbiont of Drosophila simulans wNo]	CAQ55194.1 DNA polymerase III_ epsilon subunit [Wolbachia endosymbiont of Culex quinquefasciatus Pel]	WP_038199471.1 DNA polymerase III subunit epsilon [Wolbachia pipientis]	WP_007302465.1 MULTISPECIES_ DNA polymerase III subunit epsilon [Wolbachia]	WP_047759448.1 DNA polymerase III subunit epsilon [Wolbachia endosymbiont of Armadillidium vulgare]	wFol_03800 dnaQ DNA polymerase III_ epsilon subunit 464078_464773 reverse MW_26142	OCA06396.1 DNA polymerase III_ epsilon subunit [Wolbachia endosymbiont of Trichogramma pretiosum]	wLcla05740 dnaQ DNA polymerase III_ epsilon subunit 537215_537919 forward MW_26813	ONI56724.1 DNA polymerase III_ epsilon subunit [Wolbachia pipientis wUni]	OEY86725.1 DNA polymerase III subunit epsilon [Wolbachia pipientis]		OG0000168	1	1	1	1	1	1	1	1	1	1	1	1	1	1	1	1	1	1		1	0		OG0000168	#DIV/0!	#DIV/0!	#DIV/0!	#DIV/0!	#DIV/0!	#DIV/0!
OG0000169	wOo_09300 wOo_09300 preprotein translocase subunit SecB 841401_841904 reverse MW_18679	WP_025264149.1 protein-export chaperone SecB [Wolbachia endosymbiont of Onchocerca volvulus]	gi|58584798|ref|YP_198371.1| Preprotein translocase subunit SecB [Wolbachia endosymbiont strain TRS of Brugia malayi]	BAO99816.1 protein-export protein SecB [Wolbachia endosymbiont of Cimex lectularius]	CDR78521.1 preprotein translocase subunit SecB_Protein-export protein secB_preprotein translocase subunit SecB_protein-export chaperone SecB_Preprotein translocase subunit SecB [Wolbachia]	AAS13861.1 protein-export protein SecB [Wolbachia endosymbiont of Drosophila melanogaster]	AGJ99613.1 Protein-export protein SecB [Wolbachia endosymbiont of Drosophila simulans wHa]	ACN94992.1 protein-export protein SecB [Wolbachia sp. wRi]	AGJ99057.1 Protein-export protein SecB [Wolbachia endosymbiont of Drosophila simulans wNo]	CAQ55196.1 protein-export protein SecB [Wolbachia endosymbiont of Culex quinquefasciatus Pel]	WP_038199468.1 protein-export protein SecB [Wolbachia pipientis]	WP_007302467.1 MULTISPECIES_ protein-export protein SecB [Wolbachia]	WP_047759449.1 preprotein translocase subunit SecB [Wolbachia endosymbiont of Armadillidium vulgare]	wFol_03820 secB Preprotein translocase subunit SecB 465636_466139 forward MW_18687	OCA06394.1 protein-export chaperone SecB [Wolbachia endosymbiont of Trichogramma pretiosum]	wLcla05720 secB Protein-export protein SecB 535904_536407 reverse MW_18839	ONI56726.1 protein-export chaperone SecB [Wolbachia pipientis wUni]	OEY86723.1 protein-export chaperone SecB [Wolbachia pipientis]		OG0000169	1	1	1	1	1	1	1	1	1	1	1	1	1	1	1	1	1	1		1	0		OG0000169	#DIV/0!	#DIV/0!	#DIV/0!	#DIV/0!	#DIV/0!	#DIV/0!
OG0000170	wOo_08300 wOo_08300 aconitate hydratase 748759_751383 reverse MW_96334	WP_025264111.1 aconitate hydratase [Wolbachia endosymbiont of Onchocerca volvulus]	gi|58584797|ref|YP_198370.1| Aconitase A [Wolbachia endosymbiont strain TRS of Brugia malayi]	BAO99335.1 aconitate hydratase [Wolbachia endosymbiont of Cimex lectularius]	CDR78522.1 aconitate hydratase_Aconitate hydratase 1_aconitate hydratase_3-isopropylmalate dehydratase large subunit_aconitate hydratase 1_Aconitase family _aconitate hydratase_ [Wolbachia]	AAS13860.1 aconitate hydratase [Wolbachia endosymbiont of Drosophila melanogaster]	AGJ99614.1 Aconitate hydratase [Wolbachia endosymbiont of Drosophila simulans wHa]	ACN94993.1 aconitate hydratase 1 [Wolbachia sp. wRi]	AGJ99058.1 Aconitate hydratase [Wolbachia endosymbiont of Drosophila simulans wNo]	CAQ55197.1 aconitate hydratase [Wolbachia endosymbiont of Culex quinquefasciatus Pel]	WP_038199466.1 aconitate hydratase [Wolbachia pipientis]	WP_019236887.1 aconitate hydratase [Wolbachia pipientis]	WP_047759450.1 aconitate hydratase [Wolbachia endosymbiont of Armadillidium vulgare]	wFol_03830 wFol_03830 Aconitate hydratase 466184_468802 forward MW_95451	OCA06393.1 aconitate hydratase 1 [Wolbachia endosymbiont of Trichogramma pretiosum]	wLcla05710 acnA Aconitate hydratase 533276_535897 reverse MW_95373	ONI56727.1 aconitate hydratase 1 [Wolbachia pipientis wUni]	OEY86722.1 aconitate hydratase 1 [Wolbachia pipientis]		OG0000170	1	1	1	1	1	1	1	1	1	1	1	1	1	1	1	1	1	1		1	0		OG0000170	#DIV/0!	#DIV/0!	#DIV/0!	#DIV/0!	#DIV/0!	#DIV/0!
OG0000171	wOo_08290 wOo_08290 bifunctional proline dehydrogenasepyrroline-5-carboxylate dehydrogenase 745507_748647 reverse MW_117184	WP_025264110.1 bifunctional proline dehydrogenase/L-glutamate gamma-semialdehyde dehydrogenase [Wolbachia endosymbiont of Onchocerca volvulus]	gi|58584796|ref|YP_198369.1| Proline dehydrogenase_ P5C dehydrogenase_ PutA ortholog [Wolbachia endosymbiont strain TRS of Brugia malayi]	BAO99440.1 proline dehydrogenase P5C dehydrogenase PutA ortholog [Wolbachia endosymbiont of Cimex lectularius]	CDR78523.1 bifunctional proline dehydrogenase/pyrroline-5-carboxylate dehydrogenase_Bifunctional protein putA_bifunctional proline dehydrogenase/pyrroline-5-carboxylate dehydrogenase_Delta 1-pyrroline-5-carboxylate dehydrogenase_delta-1-pyrroline-5-carboxylate dehydrogenase_Aldehyde dehydrogenase family [Wolbachia]	AAS13859.1 proline dehydrogenase/delta-1-pyrroline-5-carboxylate dehydrogenase [Wolbachia endosymbiont of Drosophila melanogaster]	AGJ99615.1 Proline dehydrogenase / Delta-1-pyrroline-5-carboxylate dehydrogenase [Wolbachia endosymbiont of Drosophila simulans wHa]	ACN94994.1 Proline dehydrogenase / Delta-1-pyrroline-5-carboxylate dehydrogenase [Wolbachia sp. wRi]	AGJ99059.1 Proline dehydrogenase/delta-1-pyrroline-5-carboxylate dehydrogenase [Wolbachia endosymbiont of Drosophila simulans wNo]	CAQ55198.1 proline dehydrogenase/delta-1-pyrroline-5-carboxylate dehydrogenase [Wolbachia endosymbiont of Culex quinquefasciatus Pel]	WP_038199463.1 bifunctional proline dehydrogenase/L-glutamate gamma-semialdehyde dehydrogenase [Wolbachia pipientis]	WP_019236888.1 bifunctional proline dehydrogenase/L-glutamate gamma-semialdehyde dehydrogenase [Wolbachia pipientis]	WP_047759451.1 integrase [Wolbachia endosymbiont of Armadillidium vulgare]	wFol_14730 putA Bifunctional protein PutA 1753496_1756636 reverse MW_116457	OCA06392.1 delta-1-pyrroline-5-carboxylate dehydrogenase [Wolbachia endosymbiont of Trichogramma pretiosum]	wLcla05700 putA Bifunctional protein PutA 530014_533154 reverse MW_116707	ONI56728.1 bifunctional protein putA [Wolbachia pipientis wUni]	OEY86521.1 bifunctional proline dehydrogenase/L-glutamate gamma-semialdehyde dehydrogenase [Wolbachia pipientis]		OG0000171	1	1	1	1	1	1	1	1	1	1	1	1	1	1	1	1	1	1		1	0		OG0000171	#DIV/0!	#DIV/0!	#DIV/0!	#DIV/0!	#DIV/0!	#DIV/0!
OG0000172	wOo_06020 wOo_06020 D-alanyl-D-alanine carboxypeptidase 535292_536404 forward MW_42251	WP_025264000.1 D-alanyl-D-alanine carboxypeptidase [Wolbachia endosymbiont of Onchocerca volvulus]	gi|58584548|ref|YP_198121.1| D-alanyl-D-alanine carboxypeptidase [Wolbachia endosymbiont strain TRS of Brugia malayi]	BAO99636.1 D-alanyl-D-alanine carboxypeptidase [Wolbachia endosymbiont of Cimex lectularius]	CDR78528.1 D-alanyl-D-alanine carboxypeptidase_D-alanyl-D-alanine carboxypeptidase dacA precursor_D-alanyl-D-alanine carboxypeptidase_D-alanyl-D-alanine carboxypeptidase [Wolbachia]	AAS13855.1 D-alanyl-D-alanine carboxypeptidase [Wolbachia endosymbiont of Drosophila melanogaster]	AGJ99618.1 D-alanyl-D-alanine carboxypeptidase [Wolbachia endosymbiont of Drosophila simulans wHa]	ACN94999.1 D-alanyl-D-alanine carboxypeptidase [Wolbachia sp. wRi]	AGJ99422.1 D-alanyl-D-alanine carboxypeptidase [Wolbachia endosymbiont of Drosophila simulans wNo]	CAQ55464.1 D-alanyl-D-alanine carboxypeptidase [Wolbachia endosymbiont of Culex quinquefasciatus Pel]	WP_010082605.1 MULTISPECIES_ D-alanyl-D-alanine carboxypeptidase [Wolbachia]	WP_019236538.1 D-alanyl-D-alanine carboxypeptidase [Wolbachia pipientis]	WP_047758734.1 D-alanyl-D-alanine carboxypeptidase [Wolbachia endosymbiont of Armadillidium vulgare]	wFol_06750 wFol_06750 D-alanyl-D-alanine carboxypeptidase 800681_801787 reverse MW_41833	OCA05824.1 D-alanyl-D-alanine carboxypeptidase family protein [Wolbachia endosymbiont of Trichogramma pretiosum]	wLcla01330 dacC D-alanyl-D-alanine carboxypeptidase 110674_111780 reverse MW_41991	ONI56737.1 D-alanyl-D-alanine carboxypeptidase family protein [Wolbachia pipientis wUni]	OEY86787.1 D-alanyl-D-alanine carboxypeptidase [Wolbachia pipientis]		OG0000172	1	1	1	1	1	1	1	1	1	1	1	1	1	1	1	1	1	1		1	0		OG0000172	#DIV/0!	#DIV/0!	#DIV/0!	#DIV/0!	#DIV/0!	#DIV/0!
OG0000173	wOo_01500 wOo_01500 cell division septal protein 133300_134058 forward MW_29447	WP_025264276.1 cell division protein FtsQ [Wolbachia endosymbiont of Onchocerca volvulus]	gi|58584828|ref|YP_198401.1| Cell division septal protein [Wolbachia endosymbiont strain TRS of Brugia malayi]	BAO99428.1 cell division protein FtsQ putative [Wolbachia endosymbiont of Cimex lectularius]	CDR78531.1 cell division protein FtsQ_POTRA domain_ FtsQ-type [Wolbachia]	AAS13854.1 cell division protein FtsQ_ putative [Wolbachia endosymbiont of Drosophila melanogaster]	AGJ99619.1 Cell division protein FtsQ_ putative [Wolbachia endosymbiont of Drosophila simulans wHa]	ACN95000.1 cell division protein FtsQ_ putative [Wolbachia sp. wRi]	AGJ99412.1 Cell division protein FtsQ_ putative [Wolbachia endosymbiont of Drosophila simulans wNo]	CAQ54512.1 cell division protein FtsQ_ putative [Wolbachia endosymbiont of Culex quinquefasciatus Pel]	WP_010962363.1 MULTISPECIES_ cell division protein FtsQ [Wolbachia]	WP_019236299.1 cell division protein FtsQ [Wolbachia pipientis]	WP_047759014.1 cell division protein FtsQ [Wolbachia endosymbiont of Armadillidium vulgare]	wFol_01790 wFol_01790 Putative cell division protein FtsQ 204519_205361 reverse MW_32563	OCA05804.1 cell division FtsQ family protein [Wolbachia endosymbiont of Trichogramma pretiosum]	wLcla01100 ftsQ Cell division protein FtsQ 90601_91359 reverse MW_29381	ONI56738.1 cell division protein FtsQ family protein [Wolbachia pipientis wUni]	OEY86658.1 hypothetical protein BIY23_03090 [Wolbachia pipientis]		OG0000173	1	1	1	1	1	1	1	1	1	1	1	1	1	1	1	1	1	1		1	0		OG0000173	#DIV/0!	#DIV/0!	#DIV/0!	#DIV/0!	#DIV/0!	#DIV/0!
OG0000174	wOo_01490 wOo_01490 D-alanine-D-alanine ligase 132380_133288 forward MW_34097	WP_025264275.1 D-alanine--D-alanine ligase [Wolbachia endosymbiont of Onchocerca volvulus]	gi|58584827|ref|YP_198400.1| D-alanine-D-alanine ligase [Wolbachia endosymbiont strain TRS of Brugia malayi]	BAO99427.1 D-alanine--D-alanine ligase [Wolbachia endosymbiont of Cimex lectularius]	CDR78532.1 D-alanine--D-alanine ligase_D-alanine--D-alanine ligase_D-alanine--D-alanine ligase_Predicted ATP-grasp enzyme_D-alanine--D-alanine ligase_D-ala D-ala ligase C-terminus [Wolbachia]	AAS13853.1 D-alanine--D-alanine ligase [Wolbachia endosymbiont of Drosophila melanogaster]	AGJ99620.1 D-alanine--D-alanine ligase [Wolbachia endosymbiont of Drosophila simulans wHa]	ACN95001.1 D-alanine--D-alanine ligase [Wolbachia sp. wRi]	AGJ99413.1 D-alanine--D-alanine ligase [Wolbachia endosymbiont of Drosophila simulans wNo]	CAQ54511.1 D-alanine--D-alanine ligase [Wolbachia endosymbiont of Culex quinquefasciatus Pel]	WP_010082603.1 MULTISPECIES_ D-alanine--D-alanine ligase [Wolbachia]	WP_038197640.1 D-alanine--D-alanine ligase [Wolbachia pipientis]		wFol_01800 ddl D-alanine--D-alanine ligase 205342_206445 reverse MW_41307	OCA05805.1 D-alanine--D-alanine ligase family protein [Wolbachia endosymbiont of Trichogramma pretiosum]	wLcla01110 ddl D-alanine--D-alanine ligase 91340_92287 reverse MW_35547, wLcla08560 wLcla08560 D-alanine--D-alanine ligase 781326_782186 reverse MW_32195	ONI56739.1 D-alanine--D-alanine ligase family protein [Wolbachia pipientis wUni]	OEY86659.1 D-alanine--D-alanine ligase [Wolbachia pipientis]		OG0000174	1	1	1	1	1	1	1	1	1	1	1	1	0	1	1	2	1	1		1	0.342997		OG0000174	0	0	0	0	0	0
OG0000175	wOo_10680 wOo_10680 ferredoxin 951060_951428 reverse MW_14217	WP_025264209.1 ferredoxin [Wolbachia endosymbiont of Onchocerca volvulus]	gi|58584826|ref|YP_198399.1| Ferredoxin [Wolbachia endosymbiont strain TRS of Brugia malayi]	BAO99426.1 ferredoxin 4Fe-4S [Wolbachia endosymbiont of Cimex lectularius]	CDR78534.1 ferredoxin_ 4Fe-4S_Ferredoxin 1_NADH dehydrogenase subunit I_Uncharacterized Fe-S center protein_[FeFe] hydrogenase_ group B1/B3_Domain of unknown function _DUF3470_ [Wolbachia]	AAS13851.1 ferredoxin_ 4Fe-4S [Wolbachia endosymbiont of Drosophila melanogaster]	AGJ99622.1 Ferredoxin_ 4Fe-4S [Wolbachia endosymbiont of Drosophila simulans wHa]	ACN95003.1 ferredoxin_ 4Fe-4S [Wolbachia sp. wRi]	AGJ99415.1 Ferredoxin_ 4Fe-4S [Wolbachia endosymbiont of Drosophila simulans wNo]	CAQ55475.1 ferredoxin_ 4Fe-4S [Wolbachia endosymbiont of Culex quinquefasciatus Pel]	WP_010082601.1 MULTISPECIES_ ferredoxin [Wolbachia]	WP_007302780.1 MULTISPECIES_ ferredoxin [Wolbachia]	WP_047759015.1 ferredoxin [Wolbachia endosymbiont of Armadillidium vulgare]	wFol_10710 wFol_10710 Ferredoxin 1282578_1282949 forward MW_14212	OCA05807.1 4Fe-4S binding domain protein [Wolbachia endosymbiont of Trichogramma pretiosum]	wLcla01140 fdxA Ferredoxin_ 4Fe-4S 93525_93899 reverse MW_14250	ONI56742.1 ferredoxin 1 [Wolbachia pipientis wUni]	OEY87039.1 ferredoxin [Wolbachia pipientis]		OG0000175	1	1	1	1	1	1	1	1	1	1	1	1	1	1	1	1	1	1		1	0		OG0000175	#DIV/0!	#DIV/0!	#DIV/0!	#DIV/0!	#DIV/0!	#DIV/0!
OG0000176	wOo_04840 wOo_04840 triosephosphate isomerase 415866_416585 forward MW_26712	WP_014868941.1 MULTISPECIES_ triose-phosphate isomerase [Wolbachia]	gi|58584665|ref|YP_198238.1| Triosephosphate isomerase [Wolbachia endosymbiont strain TRS of Brugia malayi]	BAO99882.1 triosephosphate isomerase [Wolbachia endosymbiont of Cimex lectularius]	CDR78537.1 triosephosphate isomerase_Triosephosphate isomerase_triosephosphate isomerase_triose-phosphate isomerase_Triosephosphate isomerase [Wolbachia]	AAS13849.1 triosephosphate isomerase [Wolbachia endosymbiont of Drosophila melanogaster]	AGJ99624.1 Triosephosphate isomerase [Wolbachia endosymbiont of Drosophila simulans wHa]	ACN95005.1 triosephosphate isomerase [Wolbachia sp. wRi]	AGJ98634.1 Triosephosphate isomerase [Wolbachia endosymbiont of Drosophila simulans wNo]	CAQ54640.1 triosephosphate isomerase [Wolbachia endosymbiont of Culex quinquefasciatus Pel]	WP_015588848.1 MULTISPECIES_ triose-phosphate isomerase [Wolbachia]	WP_019236636.1 triose-phosphate isomerase [Wolbachia pipientis]	WP_047759017.1 triosephosphate isomerase [Wolbachia endosymbiont of Armadillidium vulgare]	wFol_04820 tpiA Triosephosphate isomerase 589420_590121 reverse MW_26005	OCA07036.1 triosephosphate isomerase family protein [Wolbachia endosymbiont of Trichogramma pretiosum]	wLcla12230 tpiA Triosephosphate isomerase 1125045_1125755 forward MW_26100	ONI56744.1 triose-phosphate isomerase [Wolbachia pipientis wUni]	OEY86569.1 triose-phosphate isomerase [Wolbachia pipientis]		OG0000176	1	1	1	1	1	1	1	1	1	1	1	1	1	1	1	1	1	1		1	0		OG0000176	#DIV/0!	#DIV/0!	#DIV/0!	#DIV/0!	#DIV/0!	#DIV/0!
OG0000177	wOo_06590 wOo_06590 preprotein translocase subunit SecD 591795_593309 reverse MW_55206	WP_025264030.1 protein-export membrane protein SecD [Wolbachia endosymbiont of Onchocerca volvulus]	gi|58585045|ref|YP_198618.1| Preprotein translocase subunit SecD [Wolbachia endosymbiont strain TRS of Brugia malayi]	BAO99380.1 preprotein translocase SecD subunit [Wolbachia endosymbiont of Cimex lectularius]	CDR78543.1 preprotein translocase subunit SecD_hypothetical protein_preprotein translocase subunit SecD_Predicted exporter_protein-export membrane protein SecD_Protein export membrane protein [Wolbachia]	AAS13846.1 protein-export membrane protein SecD [Wolbachia endosymbiont of Drosophila melanogaster]	AGJ99627.1 Preprotein translocase_ SecD subunit [Wolbachia endosymbiont of Drosophila simulans wHa]	ACN95008.1 Preprotein translocase_ SecD subunit [Wolbachia sp. wRi]	AGJ98587.1 Protein-export membrane protein SecD [Wolbachia endosymbiont of Drosophila simulans wNo]	CAQ54584.1 protein-export membrane protein SecD [Wolbachia endosymbiont of Culex quinquefasciatus Pel]	WP_038199447.1 protein-export membrane protein SecD [Wolbachia pipientis]	WP_019236607.1 protein-export membrane protein SecD [Wolbachia pipientis]	WP_047758779.1 preprotein translocase subunit SecD [Wolbachia endosymbiont of Armadillidium vulgare]	wFol_14950 secD Protein translocase subunit SecD 1774126_1775736 forward MW_58075	OCA05786.1 export membrane protein SecD [Wolbachia endosymbiont of Trichogramma pretiosum]	wLcla00700 secD Protein translocase subunit SecD 54145_55659 forward MW_54992	ONI56751.1 protein-export membrane protein SecD [Wolbachia pipientis wUni]	OEY87011.1 protein-export membrane protein SecD [Wolbachia pipientis]		OG0000177	1	1	1	1	1	1	1	1	1	1	1	1	1	1	1	1	1	1		1	0		OG0000177	#DIV/0!	#DIV/0!	#DIV/0!	#DIV/0!	#DIV/0!	#DIV/0!
OG0000178			gi|58584922|ref|YP_198495.1| hypothetical protein Wbm0665 [Wolbachia endosymbiont strain TRS of Brugia malayi]		CDR78556.1 ankyrin repeat-containing protein_Ribulose-5-phosphate 4-epimerase and related epimerases and aldolases_chromosome segregation protein SMC_Ankyrin repeats _3 copies_ [Wolbachia]	AAS13834.1 ankyrin repeat domain protein [Wolbachia endosymbiont of Drosophila melanogaster]		ACN94925.1 ankyrin repeat domain protein [Wolbachia sp. wRi]	AGJ99455.1 Ankyrin repeat domain protein [Wolbachia endosymbiont of Drosophila simulans wNo]	CAQ55383.1 ankyrin repeat domain protein [Wolbachia endosymbiont of Culex quinquefasciatus Pel]	WP_038199071.1 hypothetical protein [Wolbachia pipientis]	WP_007302626.1 MULTISPECIES_ hypothetical protein [Wolbachia]	WP_047758877.1 ankyrin [Wolbachia endosymbiont of Armadillidium vulgare]		OCA06157.1 ankyrin repeat family protein [Wolbachia endosymbiont of Trichogramma pretiosum]	wLcla04010 wLcla04010 Ankyrin repeat domain protein 347191_348522 forward MW_49033	ONI55967.1 folylpolyglutamate synthase [Wolbachia pipientis wUni], ONI55989.1 hypothetical protein N500_0945 [Wolbachia pipientis wUni], ONI56547.1 hypothetical protein N500_0370 [Wolbachia pipientis wUni], ONI56832.1 ankyrin repeat family protein [Wolbachia pipientis wUni], ONI56834.1 ankyrin repeat domain protein [Wolbachia pipientis wUni], ONI56835.1 M protein repeat family protein [Wolbachia …	OEY86874.1 hypothetical protein BIY23_04585 [Wolbachia pipientis]		OG0000178	0	0	1	0	1	1	0	1	1	1	1	1	1	0	1	1	6	1		1	1.32842		OG0000178	-0.752773	-0.752773	0	-0.752773	0	0
OG0000179	wOo_00140 wOo_00140 23S rRNA methylase 8985_9578 forward MW_22635	WP_029784317.1 50S rRNA methyltransferase [Wolbachia endosymbiont of Onchocerca volvulus]	gi|58584834|ref|YP_198407.1| 23S rRNA methylase [Wolbachia endosymbiont strain TRS of Brugia malayi]	BAO99389.1 23S rRNA methylase_ partial [Wolbachia endosymbiont of Cimex lectularius]	CDR78557.1 ribosomal RNA large subunit methyltransferase J_Ribosomal RNA large subunit methyltransferase E_23S rRNA methyltransferase J_Predicted RNA-binding protein_ contains TRAM domain_ribosomal RNA large subunit methyltransferase J_FtsJ-like methyltransferase [Wolbachia]	AAS13832.1 ribosomal RNA large subunit methyltransferase J_ putative [Wolbachia endosymbiont of Drosophila melanogaster]	AGJ99549.1 Ribosomal RNA large subunit methyltransferase E [Wolbachia endosymbiont of Drosophila simulans wHa]	ACN94924.1 ribosomal RNA large subunit methyltransferase J_ putative [Wolbachia sp. wRi]	AGJ98739.1 Ribosomal RNA large subunit methyltransferase E [Wolbachia endosymbiont of Drosophila simulans wNo]	CAQ54715.1 ribosomal RNA large subunit methyltransferase J_ putative [Wolbachia endosymbiont of Culex quinquefasciatus Pel]	WP_038199070.1 50S rRNA methyltransferase [Wolbachia pipientis]	WP_007302033.1 MULTISPECIES_ 50S rRNA methyltransferase [Wolbachia]	WP_047759804.1 50S rRNA methyltransferase [Wolbachia endosymbiont of Armadillidium vulgare]	wFol_01720 rlmE Ribosomal RNA large subunit methyltransferase E 199810_200373 reverse MW_21039	OCA06956.1 ftsJ-like methyltransferase family protein [Wolbachia endosymbiont of Trichogramma pretiosum]	wLcla10770 rlmE Ribosomal RNA large subunit methyltransferase E 991183_991761 forward MW_21699	ONI56831.1 ftsJ-like methyltransferase family protein [Wolbachia pipientis wUni]	OEY86732.1 50S rRNA methyltransferase [Wolbachia pipientis]		OG0000179	1	1	1	1	1	1	1	1	1	1	1	1	1	1	1	1	1	1		1	0		OG0000179	#DIV/0!	#DIV/0!	#DIV/0!	#DIV/0!	#DIV/0!	#DIV/0!
OG0000180	wOo_00120 wOo_00120 Outer membrane protein 7091_8302 forward MW_45116	WP_025264220.1 membrane protein [Wolbachia endosymbiont of Onchocerca volvulus]	gi|58584832|ref|YP_198405.1| Outer membrane protein [Wolbachia endosymbiont strain TRS of Brugia malayi]	BAO99391.1 outer membrane protein TolC putative [Wolbachia endosymbiont of Cimex lectularius]	CDR78559.1 outer membrane protein TolC_Outer membrane efflux protein BepC precursor_outer membrane channel protein_type I secretion outer membrane protein_ TolC family_Outer membrane efflux protein [Wolbachia]	AAS13830.1 outer membrane protein TolC_ putative [Wolbachia endosymbiont of Drosophila melanogaster]	AGJ99547.1 Outer membrane protein TolC_ putative [Wolbachia endosymbiont of Drosophila simulans wHa]	ACN94922.1 outer membrane protein TolC_ putative [Wolbachia sp. wRi]	AGJ98741.1 Putative outer membrane protein [Wolbachia endosymbiont of Drosophila simulans wNo]	CAQ54717.1 putative outer membrane protein [Wolbachia endosymbiont of Culex quinquefasciatus Pel]	WP_038199062.1 membrane protein [Wolbachia pipientis]	WP_026097234.1 membrane protein [Wolbachia pipientis]	WP_047759863.1 membrane protein [Wolbachia endosymbiont of Armadillidium vulgare]	wFol_01740 wFol_01740 Putative outer membrane protein TolC 201060_202301 reverse MW_45927	OCA06954.1 outer membrane efflux family protein [Wolbachia endosymbiont of Trichogramma pretiosum]	wLcla10750 wLcla10750 Putative outer membrane protein TolC 989343_990581 forward MW_45784	ONI56829.1 outer membrane efflux family protein [Wolbachia pipientis wUni]	OEY86734.1 hypothetical protein BIY23_02690 [Wolbachia pipientis]		OG0000180	1	1	1	1	1	1	1	1	1	1	1	1	1	1	1	1	1	1		1	0		OG0000180	#DIV/0!	#DIV/0!	#DIV/0!	#DIV/0!	#DIV/0!	#DIV/0!
OG0000181	wOo_00110 wOo_00110 50S ribosomal protein L13 6478_6963 reverse MW_18668	WP_025264219.1 50S ribosomal protein L13 [Wolbachia endosymbiont of Onchocerca volvulus]	gi|58584831|ref|YP_198404.1| Ribosomal protein L13 [Wolbachia endosymbiont strain TRS of Brugia malayi]	BAO99392.1 ribosomal protein L13 [Wolbachia endosymbiont of Cimex lectularius]	CDR78560.1 50S ribosomal protein L13_RRP-L13_50S ribosomal protein L13_Ribosomal protein L13_ribosomal protein L13_Ribosomal protein L13 [Wolbachia]	AAS13829.1 ribosomal protein L13 [Wolbachia endosymbiont of Drosophila melanogaster]	AGJ99546.1 50S ribosomal protein L13 [Wolbachia endosymbiont of Drosophila simulans wHa]	ACN94921.1 ribosomal protein L13 [Wolbachia sp. wRi]	AGJ98742.1 50S ribosomal protein L13 [Wolbachia endosymbiont of Drosophila simulans wNo]	CAQ54718.1 ribosomal protein L13 [Wolbachia endosymbiont of Culex quinquefasciatus Pel]	WP_010082596.1 MULTISPECIES_ 50S ribosomal protein L13 [Wolbachia]	WP_006014941.1 MULTISPECIES_ 50S ribosomal protein L13 [Wolbachia]	WP_047759802.1 50S ribosomal protein L13 [Wolbachia endosymbiont of Armadillidium vulgare]	wFol_01750 rplM 50S ribosomal protein L13 202434_202892 forward MW_17503	OCA06953.1 ribosomal protein L13 [Wolbachia endosymbiont of Trichogramma pretiosum]	wLcla10740 rplM 50S ribosomal protein L13 988780_989238 reverse MW_17503	ONI56828.1 ribosomal protein L13 [Wolbachia pipientis wUni]	OEY86735.1 50S ribosomal protein L13 [Wolbachia pipientis]		OG0000181	1	1	1	1	1	1	1	1	1	1	1	1	1	1	1	1	1	1		1	0		OG0000181	#DIV/0!	#DIV/0!	#DIV/0!	#DIV/0!	#DIV/0!	#DIV/0!
OG0000182	wOo_00100 wOo_00100 30S ribosomal protein S9 6021_6467 reverse MW_16766	WP_044104092.1 30S ribosomal protein S9 [Wolbachia endosymbiont of Onchocerca volvulus]	gi|58584830|ref|YP_198403.1| Ribosomal protein S9 [Wolbachia endosymbiont strain TRS of Brugia malayi]	BAO99393.1 ribosomal protein S9 [Wolbachia endosymbiont of Cimex lectularius]	CDR78561.1 30S ribosomal protein S9_RRP-S9_30S ribosomal protein S9_Ribosomal protein S9_archaeal ribosomal protein S9P_Ribosomal protein S9/S16 [Wolbachia]	AAS13828.1 ribosomal protein S9 [Wolbachia endosymbiont of Drosophila melanogaster]	AGJ99545.1 30S ribosomal protein S9 [Wolbachia endosymbiont of Drosophila simulans wHa]	ACN94920.1 ribosomal protein S9 [Wolbachia sp. wRi]	AGJ98743.1 30S ribosomal protein S9 [Wolbachia endosymbiont of Drosophila simulans wNo]	CAQ54719.1 ribosomal protein S9 [Wolbachia endosymbiont of Culex quinquefasciatus Pel]	WP_038199060.1 30S ribosomal protein S9 [Wolbachia pipientis]	WP_007302036.1 MULTISPECIES_ 30S ribosomal protein S9 [Wolbachia]	WP_047759801.1 30S ribosomal protein S9 [Wolbachia endosymbiont of Armadillidium vulgare]	wFol_01760 rpsI 30S ribosomal protein S9 202903_203349 forward MW_16389	OCA06952.1 ribosomal S9/S16 family protein [Wolbachia endosymbiont of Trichogramma pretiosum]	wLcla10730 rpsI 30S ribosomal protein S9 988331_988768 reverse MW_16224	ONI56827.1 ribosomal protein S9/S16 family protein [Wolbachia pipientis wUni]	OEY86736.1 30S ribosomal protein S9 [Wolbachia pipientis]		OG0000182	1	1	1	1	1	1	1	1	1	1	1	1	1	1	1	1	1	1		1	0		OG0000182	#DIV/0!	#DIV/0!	#DIV/0!	#DIV/0!	#DIV/0!	#DIV/0!
OG0000183	wOo_00090 wOo_00090 nucleoid DNA-binding protein 5557_5868 reverse MW_11774	WP_014868675.1 MULTISPECIES_ restriction endonuclease subunit S [Wolbachia]	gi|58584829|ref|YP_198402.1| Bacterial nucleoid DNA-binding protein_ HupA family [Wolbachia endosymbiont strain TRS of Brugia malayi]	BAO99394.1 DNA-binding protein HU family [Wolbachia endosymbiont of Cimex lectularius]	CDR78562.1 HU family DNA-binding protein_Px_integration host factor subunit alpha_integration host factor_ beta subunit_Bacterial DNA-binding protein [Wolbachia]	AAS13827.1 DNA-binding protein_ HU family [Wolbachia endosymbiont of Drosophila melanogaster]	AGJ99544.1 DNA-binding protein_ HU family [Wolbachia endosymbiont of Drosophila simulans wHa]	ACN94919.1 DNA-binding protein_ HU family [Wolbachia sp. wRi]	AGJ98744.1 DNA-binding protein_ HU family [Wolbachia endosymbiont of Drosophila simulans wNo]	CAQ54720.1 DNA-binding protein_ HU family [Wolbachia endosymbiont of Culex quinquefasciatus Pel]	WP_038199051.1 restriction endonuclease subunit S [Wolbachia pipientis]	WP_019236673.1 MULTISPECIES_ restriction endonuclease subunit S [Wolbachia]	WP_047759800.1 restriction endonuclease subunit S [Wolbachia endosymbiont of Armadillidium vulgare]	wFol_01770 hupB DNA-binding protein HU family 203485_203796 forward MW_11928	OCA06951.1 bacterial DNA-binding family protein [Wolbachia endosymbiont of Trichogramma pretiosum]	wLcla10720 wLcla10720 DNA-binding protein_ HU family 987882_988184 reverse MW_11245	ONI56826.1 bacterial DNA-binding family protein [Wolbachia pipientis wUni]	OEY86655.1 restriction endonuclease subunit S [Wolbachia pipientis]		OG0000183	1	1	1	1	1	1	1	1	1	1	1	1	1	1	1	1	1	1		1	0		OG0000183	#DIV/0!	#DIV/0!	#DIV/0!	#DIV/0!	#DIV/0!	#DIV/0!
OG0000184	wOo_00260 wOo_00260 2-nitropropane dioxygenase-like protein 17997_19376 reverse MW_51297	WP_025264227.1 2-nitropropane dioxygenase [Wolbachia endosymbiont of Onchocerca volvulus]	gi|58584518|ref|YP_198091.1| Dioxygenases related to 2-nitropropane dioxygenase [Wolbachia endosymbiont strain TRS of Brugia malayi]	BAP00040.1 putative oxidoreductase 2-nitropropane dioxygenase family [Wolbachia endosymbiont of Cimex lectularius]	CDR78568.1 dioxygenase_putative enoyl-[acyl-carrier-protein] reductase II_Nitronate monooxygenase [Wolbachia]	AAS13931.1 conserved hypothetical protein [Wolbachia endosymbiont of Drosophila melanogaster]	AGJ99631.1 Putative oxidoreductase_ nitronate monooxygenase family [Wolbachia endosymbiont of Drosophila simulans wHa]	ACN95012.1 putative oxidoreductase_ 2-nitropropane dioxygenase family [Wolbachia sp. wRi]	AGJ99487.1 Putative dioxygenase [Wolbachia endosymbiont of Drosophila simulans wNo]	CAQ54228.1 probable dioxygenase [Wolbachia endosymbiont of Culex quinquefasciatus Pel]	WP_038199705.1 2-nitropropane dioxygenase [Wolbachia pipientis]	WP_007302730.1 MULTISPECIES_ 2-nitropropane dioxygenase [Wolbachia]	WP_047759533.1 2-nitropropane dioxygenase [Wolbachia endosymbiont of Armadillidium vulgare]	wFol_11980 wFol_11980 Putative oxidoreductase 2-nitropropane dioxygenase family 1413926_1415326 forward MW_52336	OCA06112.1 nitronate monooxygenase family protein [Wolbachia endosymbiont of Trichogramma pretiosum]	wLcla03650 wLcla03650 Putative oxidoreductase_ 2-nitropropane dioxygenase family 313334_314737 forward MW_52222	ONI56720.1 oxidoreductase_ 2-nitropropane dioxygenase family_ partial [Wolbachia pipientis wUni]	OEY86483.1 2-nitropropane dioxygenase [Wolbachia pipientis]		OG0000184	1	1	1	1	1	1	1	1	1	1	1	1	1	1	1	1	1	1		1	0		OG0000184	#DIV/0!	#DIV/0!	#DIV/0!	#DIV/0!	#DIV/0!	#DIV/0!
OG0000185	wOo_00290 wOo_00290 ribonuclease D 20138_21337 reverse MW_46488	WP_025264228.1 ribonuclease D [Wolbachia endosymbiont of Onchocerca volvulus]	gi|58584516|ref|YP_198089.1| Ribonuclease D [Wolbachia endosymbiont strain TRS of Brugia malayi]	BAP00038.1 ribonuclease D [Wolbachia endosymbiont of Cimex lectularius]	CDR78570.1 ribonuclease D_Ribonuclease D_ribonuclease D_Ribonuclease D_ribonuclease D_3'-5' exonuclease [Wolbachia]	AAS13934.1 ribonuclease D_ putative [Wolbachia endosymbiont of Drosophila melanogaster]	AGJ99633.1 Ribonuclease D [Wolbachia endosymbiont of Drosophila simulans wHa]	ACN95014.1 Ribonuclease D [Wolbachia sp. wRi]	AGJ99485.1 Putative ribonuclease D [Wolbachia endosymbiont of Drosophila simulans wNo]	CAQ54230.1 Putative ribonuclease D [Wolbachia endosymbiont of Culex quinquefasciatus Pel]	WP_010962422.1 MULTISPECIES_ ribonuclease D [Wolbachia]	WP_012481740.1 MULTISPECIES_ ribonuclease D [Wolbachia]	WP_047759535.1 ribonuclease D [Wolbachia endosymbiont of Armadillidium vulgare]	wFol_12680 wFol_12680 Ribonuclease D 1496228_1497394 forward MW_45335	OCA06110.1 3'-5' exonuclease family protein [Wolbachia endosymbiont of Trichogramma pretiosum]	wLcla03630 wLcla03630 Putative ribonuclease D 311176_312354 forward MW_45827	ONI56716.1 3'-5' exonuclease family protein [Wolbachia pipientis wUni]	OEY86551.1 ribonuclease D [Wolbachia pipientis]		OG0000185	1	1	1	1	1	1	1	1	1	1	1	1	1	1	1	1	1	1		1	0		OG0000185	#DIV/0!	#DIV/0!	#DIV/0!	#DIV/0!	#DIV/0!	#DIV/0!
OG0000186	wOo_01030 wOo_01030 DNA mismatch repair protein 85491_88004 reverse MW_93995	WP_025264257.1 DNA mismatch repair protein MutS [Wolbachia endosymbiont of Onchocerca volvulus]	gi|58584515|ref|YP_198088.1| Mismatch repair ATPase_ MutS family [Wolbachia endosymbiont strain TRS of Brugia malayi]	BAP00037.1 DNA mismatch repair protein MutS [Wolbachia endosymbiont of Cimex lectularius]	CDR78572.1 DNA mismatch repair protein MutS_DNA mismatch repair protein mutS_DNA mismatch repair protein MutS_ATP phosphoribosyltransferase_DNA mismatch repair protein MutS_MutS domain V [Wolbachia]	AAS13936.1 DNA mismatch repair protein MutS [Wolbachia endosymbiont of Drosophila melanogaster]	AGJ99635.1 DNA mismatch repair protein MutS [Wolbachia endosymbiont of Drosophila simulans wHa]	ACN95016.1 DNA mismatch repair protein MutS [Wolbachia sp. wRi]	AGJ99372.1 DNA mismatch repair protein MutS [Wolbachia endosymbiont of Drosophila simulans wNo]	CAQ54497.1 DNA mismatch repair protein MutS [Wolbachia endosymbiont of Culex quinquefasciatus Pel]	WP_038199711.1 DNA mismatch repair protein MutS [Wolbachia pipientis]	WP_017531728.1 MULTISPECIES_ DNA mismatch repair protein MutS [Wolbachia]		wFol_13740 mutS DNA mismatch repair protein MutS 1637001_1639412 forward MW_90073	OCA05842.1 DNA mismatch repair protein MutS [Wolbachia endosymbiont of Trichogramma pretiosum]	wLcla01430 mutS DNA mismatch repair protein MutS 119312_121822 forward MW_93773	ONI56703.1 DNA mismatch repair protein MutS [Wolbachia pipientis wUni], ONI56718.1 mutS domain V family protein_ partial [Wolbachia pipientis wUni]	OEY87020.1 DNA mismatch repair protein MutS [Wolbachia pipientis]		OG0000186	1	1	1	1	1	1	1	1	1	1	1	1	0	1	1	1	2	1		1	0.342997		OG0000186	0	0	0	0	0	0
OG0000187	wOo_04560 wOo_04560 tellurium resistance protein TerC 391204_391926 reverse MW_26964	WP_025263932.1 membrane protein [Wolbachia endosymbiont of Onchocerca volvulus]	gi|58584699|ref|YP_198272.1| Membrane protein TerC_ possibly involved in tellurium resistance [Wolbachia endosymbiont strain TRS of Brugia malayi]	BAP00462.1 membrane protein TerC possibly involved in tellurium resistance [Wolbachia endosymbiont of Cimex lectularius]	CDR78576.1 membrane protein_ TerC family_hypothetical protein_integral membrane protein_ YkoY family_Integral membrane protein TerC family [Wolbachia]	AAS13940.1 membrane protein_ TerC family [Wolbachia endosymbiont of Drosophila melanogaster]	AGJ99638.1 Membrane protein_ TerC family [Wolbachia endosymbiont of Drosophila simulans wHa]	ACN95019.1 membrane protein_ TerC family [Wolbachia sp. wRi]	AGJ98598.1 Membrane protein_ TerC family [Wolbachia endosymbiont of Drosophila simulans wNo]	CAQ54601.1 membrane protein_ TerC family [Wolbachia endosymbiont of Culex quinquefasciatus Pel]	WP_038199715.1 membrane protein [Wolbachia pipientis]	WP_026097226.1 membrane protein [Wolbachia pipientis]	WP_047759324.1 membrane protein [Wolbachia endosymbiont of Armadillidium vulgare]	wFol_01020 wFol_01020 Integral membrane protein_ TerC family 137654_138358 forward MW_26327	OCA05767.1 integral membrane TerC family protein [Wolbachia endosymbiont of Trichogramma pretiosum]	wLcla00960 wLcla00960 Membrane protein_ TerC family 76518_77210 forward MW_25722	ONI56708.1 integral membrane protein TerC family protein [Wolbachia pipientis wUni]	OEY86468.1 hypothetical protein BIY23_04105 [Wolbachia pipientis]		OG0000187	1	1	1	1	1	1	1	1	1	1	1	1	1	1	1	1	1	1		1	0		OG0000187	#DIV/0!	#DIV/0!	#DIV/0!	#DIV/0!	#DIV/0!	#DIV/0!
OG0000188	wOo_04550 wOo_04550 bifunctional GMP synthaseglutamine amidotransfera se protein 389644_391200 forward MW_58152	WP_029784303.1 GMP synthetase [Wolbachia endosymbiont of Onchocerca volvulus]	gi|58584700|ref|YP_198273.1| GMP synthase [Wolbachia endosymbiont strain TRS of Brugia malayi]	BAP00485.1 GMP synthase [Wolbachia endosymbiont of Cimex lectularius]	CDR78577.1 GMP synthase_GMP synthase [glutamine-hydrolyzing]_GMP synthase_3-methyladenine DNA glycosylase_GMP synthase _glutamine-hydrolyzing__ C-terminal domain_GMP synthase C terminal domain [Wolbachia]	AAS13941.1 GMP synthase [Wolbachia endosymbiont of Drosophila melanogaster]	AGJ99639.1 GMP synthase [Wolbachia endosymbiont of Drosophila simulans wHa]	ACN95020.1 GMP synthase [Wolbachia sp. wRi]	AGJ98597.1 GMP synthase [Wolbachia endosymbiont of Drosophila simulans wNo]	CAQ54600.1 GMP synthase [Wolbachia endosymbiont of Culex quinquefasciatus Pel]	WP_038199717.1 GMP synthetase [Wolbachia pipientis]	WP_019236616.1 GMP synthetase [Wolbachia pipientis]	WP_047758803.1 GMP synthase [glutamine-hydrolyzing] [Wolbachia endosymbiont of Armadillidium vulgare]	wFol_13560 guaA GMP synthase [glutamine-hydrolyzing] 1609639_1611201 reverse MW_57928	OCA05768.1 GMP synthase _glutamine-hydrolyzing__ N-terminal domain [Wolbachia endosymbiont of Trichogramma pretiosum]	wLcla00980 guaA GMP synthase [glutamine-hydrolyzing] 78533_80095 reverse MW_58197	ONI56709.1 GMP synthase [Wolbachia pipientis wUni]	OEY86450.1 glutamine-hydrolyzing GMP synthase [Wolbachia pipientis]		OG0000188	1	1	1	1	1	1	1	1	1	1	1	1	1	1	1	1	1	1		1	0		OG0000188	#DIV/0!	#DIV/0!	#DIV/0!	#DIV/0!	#DIV/0!	#DIV/0!
OG0000189	wOo_00940 wOo_00940 ribonucleotide-diphosphate reductase subunit alph a 77345_79156 forward MW_68985	WP_025264253.1 ribonucleotide-diphosphate reductase subunit alpha [Wolbachia endosymbiont of Onchocerca volvulus]	gi|58584952|ref|YP_198525.1| Ribonucleotide reductase_ alpha subunit [Wolbachia endosymbiont strain TRS of Brugia malayi]	BAO99914.1 ribonucleotide-diphosphate reductase alpha subunit [Wolbachia endosymbiont of Cimex lectularius]	CDR78578.1 ribonucleotide-diphosphate reductase subunit alph a_Ribonucleoside-diphosphate reductase 2 subunit alpha_ribonucleotide-diphosphate reductase subunit alpha_ribonucleoside-diphosphate reductase_ alpha subunit_Ribonucleotide reductase_ barrel domain [Wolbachia]	AAS13943.1 ribonucleoside-diphosphate reductase_ alpha subunit [Wolbachia endosymbiont of Drosophila melanogaster]	AGJ99640.1 Ribonucleoside-diphosphate reductase [Wolbachia endosymbiont of Drosophila simulans wHa]	ACN95021.1 ribonucleotide-diphosphate reductase alpha subunit [Wolbachia sp. wRi]	AGJ99202.1 Ribonucleoside-diphosphate reductase [Wolbachia endosymbiont of Drosophila simulans wNo]	CAQ55259.1 ribonucleoside-diphosphate reductase_ alpha subunit [Wolbachia endosymbiont of Culex quinquefasciatus Pel]	WP_038199719.1 ribonucleotide-diphosphate reductase subunit alpha [Wolbachia pipientis]	WP_007302519.1 MULTISPECIES_ ribonucleotide-diphosphate reductase subunit alpha [Wolbachia]	WP_047759275.1 ribonucleotide-diphosphate reductase subunit alpha [Wolbachia endosymbiont of Armadillidium vulgare]	wFol_02490 nrdA Ribonucleoside-diphosphate reductase 290300_292084 reverse MW_67952	OCA06321.1 ribonucleoside-diphosphate reductase_ alpha subunit [Wolbachia endosymbiont of Trichogramma pretiosum]	wLcla05190 wLcla05190 Ribonucleoside-diphosphate reductase 470177_471961 forward MW_67941	ONI56710.1 ribonucleoside-diphosphate reductase_ alpha subunit [Wolbachia pipientis wUni]	OEY86452.1 ribonucleotide-diphosphate reductase subunit alpha [Wolbachia pipientis]		OG0000189	1	1	1	1	1	1	1	1	1	1	1	1	1	1	1	1	1	1		1	0		OG0000189	#DIV/0!	#DIV/0!	#DIV/0!	#DIV/0!	#DIV/0!	#DIV/0!
OG0000190	wOo_00930 wOo_00930 TPR repeat-containing methyltransferase 76244_77317 forward MW_41359	WP_014868730.1 MULTISPECIES_ hypothetical protein [Wolbachia]	gi|58584951|ref|YP_198524.1| Predicted methyltransferase_ contains N-terminal TPR repeats [Wolbachia endosymbiont strain TRS of Brugia malayi]	BAO99913.1 predicted methyltransferase [Wolbachia endosymbiont of Cimex lectularius]	CDR78579.1 TPR domain-containing protein_bifunctional 3-demethylubiquinone-9 3-methyltransferase/ 2-octaprenyl-6-hydroxy phenol methylase_Predicted methyltransferase _contains TPR repeat__3-demethylubiquinone-9 3-O-methyltransferase_Methyltransferase domain [Wolbachia]	AAS13944.1 TPR domain protein [Wolbachia endosymbiont of Drosophila melanogaster]	AGJ99641.1 Putative methyltransferase [Wolbachia endosymbiont of Drosophila simulans wHa]	ACN95022.1 TPR domain protein [Wolbachia sp. wRi]	AGJ99203.1 Putative methyltransferase_ TPR domain protein [Wolbachia endosymbiont of Drosophila simulans wNo]	CAQ55260.1 TPR domain protein [Wolbachia endosymbiont of Culex quinquefasciatus Pel]	WP_038199723.1 hypothetical protein [Wolbachia pipientis]	WP_007302520.1 MULTISPECIES_ hypothetical protein [Wolbachia]	WP_047759274.1 hypothetical protein [Wolbachia endosymbiont of Armadillidium vulgare]	wFol_02500 wFol_02500 Putative TPR repeat-containing methyltransferase 292146_293222 reverse MW_41524	OCA06320.1 methyltransferase domain protein [Wolbachia endosymbiont of Trichogramma pretiosum]	wLcla05180 wLcla05180 Methyltransferase domain protein 469058_470128 forward MW_41096	ONI56711.1 methyltransferase domain protein [Wolbachia pipientis wUni]	OEY86453.1 hypothetical protein BIY23_04015 [Wolbachia pipientis]		OG0000190	1	1	1	1	1	1	1	1	1	1	1	1	1	1	1	1	1	1		1	0		OG0000190	#DIV/0!	#DIV/0!	#DIV/0!	#DIV/0!	#DIV/0!	#DIV/0!
OG0000191	wOo_00860 wOo_00860 ABC-type phosphate transport system permease component 70860_71951 reverse MW_39880	WP_014868727.1 MULTISPECIES_ phosphate ABC transporter permease subunit PstC [Wolbachia]	gi|58584947|ref|YP_198520.1| ABC-type phosphate transport system_ permease component [Wolbachia endosymbiont strain TRS of Brugia malayi]	BAO99909.1 phosphate ABC transporter permease protein putative [Wolbachia endosymbiont of Cimex lectularius]	CDR78582.1 phosphate ABC transporter permease_Phosphate transport system permease protein pstC_phosphate transporter permease subunit PstC_ABC-type phosphate transport system_ permease component_phosphate ABC transporter_ permease protein PstC_Binding-protein-dependent transport system inner membrane component [Wolbachia]	AAS13948.1 phosphate ABC transporter_ permease protein_ putative [Wolbachia endosymbiont of Drosophila melanogaster]	AGJ99643.1 Phosphate ABC transporter_ permease protein_ putative [Wolbachia endosymbiont of Drosophila simulans wHa]	ACN95027.1 phosphate ABC transporter_ permease protein_ putative [Wolbachia sp. wRi]	AGJ99206.1 binding-protein-dependent transport systems inner membrane component [Wolbachia endosymbiont of Drosophila simulans wNo]	CAQ55264.1 phosphate ABC transporter_ permease protein [Wolbachia endosymbiont of Culex quinquefasciatus Pel]	WP_038199744.1 phosphate ABC transporter permease subunit PstC [Wolbachia pipientis]	WP_012482001.1 MULTISPECIES_ phosphate ABC transporter permease subunit PstC [Wolbachia]	WP_047759333.1 phosphate ABC transporter permease [Wolbachia endosymbiont of Armadillidium vulgare]	wFol_01190 wFol_01190 ABC-type transporter_ permease protein 157273_158220 forward MW_34628	OCA06316.1 phosphate ABC transporter_ permease protein PstC [Wolbachia endosymbiont of Trichogramma pretiosum]	wLcla05130 wLcla05130 Phosphate transport system permease protein 462779_463867 reverse MW_40120	ONI56682.1 phosphate ABC transporter_ permease protein PstC [Wolbachia pipientis wUni]	OEY86414.1 phosphate ABC transporter permease subunit PstC [Wolbachia pipientis]		OG0000191	1	1	1	1	1	1	1	1	1	1	1	1	1	1	1	1	1	1		1	0		OG0000191	#DIV/0!	#DIV/0!	#DIV/0!	#DIV/0!	#DIV/0!	#DIV/0!
[truncated: 1,047 more rows]
[truncated: 12 more columns]

[truncated: 5 more sheets: Orthogroups shared by all, Expanded or missing in wFol, Expanded or missing in wLcla, Unassigned genes, Exclusive or mainly in PI]
