# Supplementary material for: Genome expansion of an obligate parthenogenesis-associated Wolbachia poses an exception to the symbiont reduction model
Source: BMC Genomics. 2019 Feb 6;20:106. doi: 10.1186/s12864-019-5492-9 (PMC6364476; doi:10.1186/s12864-019-5492-9)
Supplement: Supplementary file 7 — wFol annotation. GenBank data file with the wFol annotation described in this paper. (GBK 2967 kb) [file 12864_2019_5492_MOESM7_ESM.gbk]

     gene            146..1528
                     /locus_tag="wFol_00010"
     CDS             146..1528
                     /locus_tag="wFol_00010"
                     /product="Chromosomal replication initiator protein DnaA"
                     /note="Uniprot:C0R531"
                     /gene="dnaA"
                     /fasta_file="/home/lisa/Wolbachia_genomes/Genome_seqs/9_wol_genomes.faa:fasta/wFol04650.fasta.out"
                     /blastp_file="uniprot_all.fasta:blastp/wFol04650.out"
     gene            1757..4213
                     /locus_tag="wFol_00020"
     CDS             1757..4213
                     /locus_tag="wFol_00020"
                     /product="DNA topoisomerase 1"
                     /note="Uniprot:A0A0P6P4Q1"
                     /gene="topA"
                     /fasta_file="/home/lisa/Wolbachia_genomes/Genome_seqs/9_wol_genomes.faa:fasta/wFol04640.fasta.out"
                     /blastp_file="uniprot_all.fasta:blastp/wFol04640.out"
     gene            4327..5667
                     /locus_tag="wFol_00030"
     CDS             4327..5667
                     /locus_tag="wFol_00030"
                     /product="Ankyrin repeat domain protein"
                     /note="Uniprot:C3NIT9"
                     /fasta_file="/home/lisa/Wolbachia_genomes/Genome_seqs/9_wol_genomes.faa:fasta/wFol04630.fasta.out"
                     /blastp_file="uniprot_all.fasta:blastp/wFol04630.out"
     gene            complement(5935..7059)
                     /locus_tag="wFol_00040"
     CDS             complement(5935..7059)
                     /locus_tag="wFol_00040"
                     /product="Transposase, IS4 family"
                     /note="group IS4Sa"
                     /note="Uniprot:A0A0P6NQA5"
                     /fasta_file="/home/lisa/Wolbachia_genomes/Genome_seqs/9_wol_genomes.faa:fasta/wFol04620.fasta.out"
                     /blastp_file="uniprot_all.fasta:blastp/wFol04620.out"
     gene            complement(7521..8708)
                     /locus_tag="wFol_00050"
     CDS             complement(7521..8708)
                     /locus_tag="wFol_00050"
                     /product="Riboflavin biosynthesis protein RibD"
                     /note="Uniprot:B3CM17"
                     /gene="ribD"
                     /fasta_file="/home/lisa/Wolbachia_genomes/Genome_seqs/9_wol_genomes.faa:fasta/wFol04610.fasta.out"
                     /blastp_file="uniprot_all.fasta:blastp/wFol04610.out"
     gene            complement(8708..9907)
                     /locus_tag="wFol_00060"
     CDS             complement(8708..9907)
                     /locus_tag="wFol_00060"
                     /product="Deoxyguanosinetriphosphate
                     triphosphohydrolase-like protein"
                     /note="Uniprot:A0A098ASR1"
                     /gene="dgt"
                     /fasta_file="/home/lisa/Wolbachia_genomes/Genome_seqs/9_wol_genomes.faa:fasta/wFol04600.fasta.out"
                     /blastp_file="uniprot_all.fasta:blastp/wFol04600.out"
     gene            9956..10417
                     /locus_tag="wFol_00070"
     CDS             9956..10417
                     /locus_tag="wFol_00070"
                     /product="Putative iron-sulfur cluster biogenesis protein"
                     /note="Uniprot:A0A098ARH3"
                     /fasta_file="/home/lisa/Wolbachia_genomes/Genome_seqs/9_wol_genomes.faa:fasta/wFol04590.fasta.out"
                     /blastp_file="uniprot_all.fasta:blastp/wFol04590.out"
     gene            10770..11447
                     /locus_tag="wFol_00080"
     CDS             10770..11447
                     /locus_tag="wFol_00080"
                     /product="ABC transporter ATP-binding protein"
                     /note="Uniprot:A0A178GTR2"
                     /fasta_file="/home/lisa/Wolbachia_genomes/Genome_seqs/9_wol_genomes.faa:fasta/wFol04580.fasta.out"
                     /blastp_file="uniprot_all.fasta:blastp/wFol04580.out"
     gene            11514..12110
                     /locus_tag="wFol_00090"
     CDS             11514..12110
                     /locus_tag="wFol_00090"
                     /product="Putative membrane protein"
                     /note="Uniprot:A0A178GVJ7"
                     /fasta_file="/home/lisa/Wolbachia_genomes/Genome_seqs/9_wol_genomes.faa:fasta/wFol04570.fasta.out"
                     /blastp_file="uniprot_all.fasta:blastp/wFol04570.out"
     gene            complement(12240..13316)
                     /locus_tag="wFol_00100"
     CDS             complement(12240..13316)
                     /locus_tag="wFol_00100"
                     /product="Rod shape-determining protein MreB"
                     /note="Uniprot:Q73FR6"
                     /gene="mreB"
                     /fasta_file="/home/lisa/Wolbachia_genomes/Genome_seqs/9_wol_genomes.faa:fasta/wFol04560.fasta.out"
                     /blastp_file="uniprot_all.fasta:blastp/wFol04560.out"
     gene            complement(13329..14765)
                     /locus_tag="wFol_00110"
     CDS             complement(13329..14765)
                     /locus_tag="wFol_00110"
                     /product="Putative thermostable carboxypeptidase 1"
                     /note="Uniprot:C0R4S3"
                     /fasta_file="/home/lisa/Wolbachia_genomes/Genome_seqs/9_wol_genomes.faa:fasta/wFol04550.fasta.out"
                     /blastp_file="uniprot_all.fasta:blastp/wFol04550.out"
     gene            15040..15531
                     /locus_tag="wFol_00120"
     CDS             15040..15531
                     /locus_tag="wFol_00120"
                     /product="Putative Peptidoglycan-associated lipoprotein"
                     /note="Uniprot:H0U1M4"
                     /fasta_file="/home/lisa/Wolbachia_genomes/Genome_seqs/9_wol_genomes.faa:fasta/wFol04540.fasta.out"
                     /blastp_file="uniprot_all.fasta:blastp/wFol04540.out"
     gene            15829..17139
                     /locus_tag="wFol_00130"
     CDS             15829..17139
                     /locus_tag="wFol_00130"
                     /product="tRNA(Ile)-lysidine synthase"
                     /note="Uniprot:Q4ECB2"
                     /gene="mesJ"
                     /fasta_file="/home/lisa/Wolbachia_genomes/Genome_seqs/9_wol_genomes.faa:fasta/wFol04530.fasta.out"
                     /blastp_file="uniprot_all.fasta:blastp/wFol04530.out"
     gene            complement(17159..17740)
                     /locus_tag="wFol_00140"
     CDS             complement(17159..17740)
                     /locus_tag="wFol_00140"
                     /product="Dephospho-CoA kinase"
                     /note="Uniprot:A0A178GWS2"
                     /gene="coaE"
                     /fasta_file="/home/lisa/Wolbachia_genomes/Genome_seqs/9_wol_genomes.faa:fasta/wFol04520.fasta.out"
                     /blastp_file="uniprot_all.fasta:blastp/wFol04520.out"
     gene            complement(17839..19182)
                     /locus_tag="wFol_00150"
     CDS             complement(17839..19182)
                     /locus_tag="wFol_00150"
                     /product="Signal recognition particle protein"
                     /note="Uniprot:Q5GTN3"
                     /gene="ffh"
                     /fasta_file="/home/lisa/Wolbachia_genomes/Genome_seqs/9_wol_genomes.faa:fasta/wFol04510.fasta.out"
                     /blastp_file="uniprot_all.fasta:blastp/wFol04510.out"
     gene            complement(19167..20744)
                     /locus_tag="wFol_00160"
     CDS             complement(19167..20744)
                     /locus_tag="wFol_00160"
                     /product="Putative oxidoreductase"
                     /note="Uniprot:B3CML9"
                     /fasta_file="/home/lisa/Wolbachia_genomes/Genome_seqs/9_wol_genomes.faa:fasta/wFol04500.fasta.out"
                     /blastp_file="uniprot_all.fasta:blastp/wFol04500.out"
     gene            complement(21088..21414)
                     /locus_tag="wFol_00170"
     CDS             complement(21088..21414)
                     /locus_tag="wFol_00170"
                     /product="Unique protein"
                     /fasta_file="/home/lisa/Wolbachia_genomes/Genome_seqs/9_wol_genomes.faa:fasta/wFol04490.fasta.out"
                     /blastp_file="uniprot_all.fasta:blastp/wFol04490.out"
     gene            complement(21655..22017)
                     /locus_tag="wFol_00180"
     CDS             complement(21655..22017)
                     /locus_tag="wFol_00180"
                     /product="Unique protein"
                     /fasta_file="/home/lisa/Wolbachia_genomes/Genome_seqs/9_wol_genomes.faa:fasta/wFol04480.fasta.out"
                     /blastp_file="uniprot_all.fasta:blastp/wFol04480.out"
     gene            22233..25394
                     /locus_tag="wFol_00190"
     CDS             22233..25394
                     /locus_tag="wFol_00190"
                     /product="Phosphoribosylformylglycinamidine synthase
                     subunit PurL"
                     /note="Uniprot:C0R3V9"
                     /gene="purL"
                     /fasta_file="/home/lisa/Wolbachia_genomes/Genome_seqs/9_wol_genomes.faa:fasta/wFol04470.fasta.out"
                     /blastp_file="uniprot_all.fasta:blastp/wFol04470.out"
     gene            complement(25471..25857)
                     /locus_tag="wFol_00200"
     CDS             complement(25471..25857)
                     /locus_tag="wFol_00200"
                     /product="Unique protein"
                     /fasta_file="/home/lisa/Wolbachia_genomes/Genome_seqs/9_wol_genomes.faa:fasta/wFol04460.fasta.out"
                     /blastp_file="uniprot_all.fasta:blastp/wFol04460.out"
     gene            complement(25950..27119)
                     /locus_tag="wFol_00210"
     CDS             complement(25950..27119)
                     /locus_tag="wFol_00210"
                     /product="Ubiquinone biosynthesis O-methyltransferase"
                     /note="Uniprot:I7IAE1"
                     /note="Uniprot:A0A178GVZ4"
                     /gene="ubiG"
                     /fasta_file="/home/lisa/Wolbachia_genomes/Genome_seqs/9_wol_genomes.faa:fasta/wFol04440.fasta.out"
                     /fasta_file="/home/lisa/Wolbachia_genomes/Genome_seqs/9_wol_genomes.faa:fasta/wFol04450.fasta.out"
                     /blastp_file="uniprot_all.fasta:blastp/wFol04440.out"
                     /blastp_file="uniprot_all.fasta:blastp/wFol04450.out"
     gene            complement(27143..27625)
                     /locus_tag="wFol_00220"
     CDS             complement(27143..27625)
                     /locus_tag="wFol_00220"
                     /product="Single-stranded DNA-binding protein"
                     /note="Uniprot:A0A060PZZ5"
                     /gene="ssb"
                     /fasta_file="/home/lisa/Wolbachia_genomes/Genome_seqs/9_wol_genomes.faa:fasta/wFol04430.fasta.out"
                     /blastp_file="uniprot_all.fasta:blastp/wFol04430.out"
     tRNA            complement(27693..27766)
                     /ID="tRNA:Arg-2"
                     /Codon="CCG"
                     /score=73.01
                     /Name="tRNA:Arg-2"
                     /AminoAcid="Arg-2"
     tRNA            27912..27983
                     /ID="tRNA:Glu"
                     /Codon="TTC"
                     /score=62.45
                     /Name="tRNA:Glu"
                     /AminoAcid="Glu"
     gene            complement(28145..28762)
                     /locus_tag="wFol_00230"
     CDS             complement(28145..28762)
                     /locus_tag="wFol_00230"
                     /product="Octanoyltransferase"
                     /note="Uniprot:C0R437"
                     /gene="lipB"
                     /fasta_file="/home/lisa/Wolbachia_genomes/Genome_seqs/9_wol_genomes.faa:fasta/wFol04420.fasta.out"
                     /blastp_file="uniprot_all.fasta:blastp/wFol04420.out"
     gene            complement(28952..29641)
                     /locus_tag="wFol_00240"
     CDS             complement(28952..29641)
                     /locus_tag="wFol_00240"
                     /product="Putative membrane protein"
                     /note="Uniprot:A0A060Q3W8"
                     /fasta_file="/home/lisa/Wolbachia_genomes/Genome_seqs/9_wol_genomes.faa:fasta/wFol04410.fasta.out"
                     /blastp_file="uniprot_all.fasta:blastp/wFol04410.out"
     gene            complement(29942..30589)
                     /locus_tag="wFol_00250"
     CDS             complement(29942..30589)
                     /locus_tag="wFol_00250"
                     /product="Putative membrane protein"
                     /fasta_file="/home/lisa/Wolbachia_genomes/Genome_seqs/9_wol_genomes.faa:fasta/wFol04400.fasta.out"
                     /blastp_file="uniprot_all.fasta:blastp/wFol04400.out"
     gene            30835..31098
                     /locus_tag="wFol_00260"
     CDS             30835..31098
                     /locus_tag="wFol_00260"
                     /product="Translation initiation factor IF-1"
                     /note="Uniprot:Q73I46"
                     /gene="infA"
                     /fasta_file="/home/lisa/Wolbachia_genomes/Genome_seqs/9_wol_genomes.faa:fasta/wFol04390.fasta.out"
                     /blastp_file="uniprot_all.fasta:blastp/wFol04390.out"
     gene            31076..31684
                     /locus_tag="wFol_00270"
     CDS             31076..31684
                     /locus_tag="wFol_00270"
                     /product="Maf-like protein maf"
                     /note="Uniprot:A0A060Q4P3"
                     /gene="maf"
                     /fasta_file="/home/lisa/Wolbachia_genomes/Genome_seqs/9_wol_genomes.faa:fasta/wFol04380.fasta.out"
                     /blastp_file="uniprot_all.fasta:blastp/wFol04380.out"
     gene            31767..33830
                     /locus_tag="wFol_00280"
     CDS             31767..33830
                     /locus_tag="wFol_00280"
                     /product="ATP-dependent DNA helicase RecG"
                     /note="Uniprot:A0A178GYL8"
                     /note="Uniprot:A0A097GW77"
                     /gene="recG"
                     /fasta_file="/home/lisa/Wolbachia_genomes/Genome_seqs/9_wol_genomes.faa:fasta/wFol04360.fasta.out"
                     /fasta_file="/home/lisa/Wolbachia_genomes/Genome_seqs/9_wol_genomes.faa:fasta/wFol04370.fasta.out"
                     /blastp_file="uniprot_all.fasta:blastp/wFol04360.out"
                     /blastp_file="uniprot_all.fasta:blastp/wFol04370.out"
     gene            complement(33924..38447)
                     /locus_tag="wFol_00290"
     CDS             complement(33924..38447)
                     /locus_tag="wFol_00290"
                     /product="Ankyrin repeat domain protein"
                     /note="Uniprot:B3CP75"
                     /fasta_file="/home/lisa/Wolbachia_genomes/Genome_seqs/9_wol_genomes.faa:fasta/wFol04350.fasta.out"
                     /blastp_file="uniprot_all.fasta:blastp/wFol04350.out"
     gene            38590..40794
                     /locus_tag="wFol_00300"
     CDS             38590..40794
                     /locus_tag="wFol_00300"
                     /product="DNA ligase (NAD(+)) LigA"
                     /note="Uniprot:A0A178GUE3"
                     /gene="ligA"
                     /fasta_file="/home/lisa/Wolbachia_genomes/Genome_seqs/9_wol_genomes.faa:fasta/wFol04340.fasta.out"
                     /blastp_file="uniprot_all.fasta:blastp/wFol04340.out"
     gene            complement(40765..41847)
                     /locus_tag="wFol_00310"
     CDS             complement(40765..41847)
                     /locus_tag="wFol_00310"
                     /product="Efflux transporter, RND family, MFP subunit"
                     /note="Uniprot:Q73I38"
                     /fasta_file="/home/lisa/Wolbachia_genomes/Genome_seqs/9_wol_genomes.faa:fasta/wFol04330.fasta.out"
                     /blastp_file="uniprot_all.fasta:blastp/wFol04330.out"
     gene            complement(42007..43812)
                     /locus_tag="wFol_00320"
     CDS             complement(42007..43812)
                     /locus_tag="wFol_00320"
                     /product="Ribonuclease, Rne/Rng family protein"
                     /note="Uniprot:Q4EBH0"
                     /fasta_file="/home/lisa/Wolbachia_genomes/Genome_seqs/9_wol_genomes.faa:fasta/wFol04320.fasta.out"
                     /blastp_file="uniprot_all.fasta:blastp/wFol04320.out"
     gene            43977..44177
                     /locus_tag="wFol_00330"
     CDS             43977..44177
                     /locus_tag="wFol_00330"
                     /product="50S ribosomal protein L33"
                     /note="Uniprot:A0A0P6NQZ9"
                     /gene="rpmG"
                     /fasta_file="/home/lisa/Wolbachia_genomes/Genome_seqs/9_wol_genomes.faa:fasta/wFol04310.fasta.out"
                     /blastp_file="uniprot_all.fasta:blastp/wFol04310.out"
     gene            44201..44476
                     /locus_tag="wFol_00340"
     CDS             44201..44476
                     /locus_tag="wFol_00340"
                     /product="Putative phage repressor protein"
                     /note="Uniprot:M9WSP6"
                     /fasta_file="/home/lisa/Wolbachia_genomes/Genome_seqs/9_wol_genomes.faa:fasta/wFol04300.fasta.out"
                     /blastp_file="uniprot_all.fasta:blastp/wFol04300.out"
     gene            44610..47969
                     /locus_tag="wFol_00350"
     CDS             44610..47969
                     /locus_tag="wFol_00350"
                     /product="Unique protein"
                     /fasta_file="/home/lisa/Wolbachia_genomes/Genome_seqs/9_wol_genomes.faa:fasta/wFol04290.fasta.out"
                     /blastp_file="uniprot_all.fasta:blastp/wFol04290.out"
     gene            complement(48155..49144)
                     /locus_tag="wFol_00360"
     CDS             complement(48155..49144)
                     /locus_tag="wFol_00360"
                     /product="Enoyl-(Acyl-carrier-protein) reductase II"
                     /note="Uniprot:C0R4J7"
                     /gene="fabK"
                     /fasta_file="/home/lisa/Wolbachia_genomes/Genome_seqs/9_wol_genomes.faa:fasta/wFol04280.fasta.out"
                     /blastp_file="uniprot_all.fasta:blastp/wFol04280.out"
     gene            complement(49150..49671)
                     /locus_tag="wFol_00370"
     CDS             complement(49150..49671)
                     /locus_tag="wFol_00370"
                     /product="Putative cytochrome B"
                     /note="Uniprot:Q73G02"
                     /fasta_file="/home/lisa/Wolbachia_genomes/Genome_seqs/9_wol_genomes.faa:fasta/wFol04270.fasta.out"
                     /blastp_file="uniprot_all.fasta:blastp/wFol04270.out"
     gene            49784..50941
                     /locus_tag="wFol_00380"
     CDS             49784..50941
                     /locus_tag="wFol_00380"
                     /product="2-polyprenyl-6-methoxyphenol 4-hydroxylase"
                     /note="Uniprot:Q73II6"
                     /gene="ubiH"
                     /fasta_file="/home/lisa/Wolbachia_genomes/Genome_seqs/9_wol_genomes.faa:fasta/wFol04260.fasta.out"
                     /blastp_file="uniprot_all.fasta:blastp/wFol04260.out"
     gene            51087..52505
                     /locus_tag="wFol_00390"
     CDS             51087..52505
                     /locus_tag="wFol_00390"
                     /product="UDP-N-acetylglucosamine
                     1-carboxyvinyltransferase"
                     /note="Uniprot:Q4EB75"
                     /gene="murA"
                     /fasta_file="/home/lisa/Wolbachia_genomes/Genome_seqs/9_wol_genomes.faa:fasta/wFol04250.fasta.out"
                     /blastp_file="uniprot_all.fasta:blastp/wFol04250.out"
     gene            52515..53378
                     /locus_tag="wFol_00400"
     CDS             52515..53378
                     /locus_tag="wFol_00400"
                     /product="Thymidylate synthase ThyX"
                     /note="Uniprot:A0A178GUF9"
                     /gene="thyX"
                     /fasta_file="/home/lisa/Wolbachia_genomes/Genome_seqs/9_wol_genomes.faa:fasta/wFol04240.fasta.out"
                     /blastp_file="uniprot_all.fasta:blastp/wFol04240.out"
     gene            complement(53719..54186)
                     /locus_tag="wFol_00410"
     CDS             complement(53719..54186)
                     /locus_tag="wFol_00410"
                     /product="Unique protein"
                     /fasta_file="/home/lisa/Wolbachia_genomes/Genome_seqs/9_wol_genomes.faa:fasta/wFol04230.fasta.out"
                     /blastp_file="uniprot_all.fasta:blastp/wFol04230.out"
     gene            complement(54429..54905)
                     /locus_tag="wFol_00420"
     CDS             complement(54429..54905)
                     /locus_tag="wFol_00420"
                     /product="Putative membrane protein"
                     /fasta_file="/home/lisa/Wolbachia_genomes/Genome_seqs/9_wol_genomes.faa:fasta/wFol04220.fasta.out"
                     /blastp_file="uniprot_all.fasta:blastp/wFol04220.out"
     gene            55111..56460
                     /locus_tag="wFol_00430"
     CDS             55111..56460
                     /locus_tag="wFol_00430"
                     /product="Sodium/alanine symporter family protein"
                     /note="Uniprot:A0A178GV50"
                     /fasta_file="/home/lisa/Wolbachia_genomes/Genome_seqs/9_wol_genomes.faa:fasta/wFol04210.fasta.out"
                     /blastp_file="uniprot_all.fasta:blastp/wFol04210.out"
     gene            complement(56431..59232)
                     /locus_tag="wFol_00440"
     CDS             complement(56431..59232)
                     /locus_tag="wFol_00440"
                     /product="Ankyrin repeat domain protein"
                     /note="Uniprot:A0A0P6NNX0"
                     /fasta_file="/home/lisa/Wolbachia_genomes/Genome_seqs/9_wol_genomes.faa:fasta/wFol04200.fasta.out"
                     /blastp_file="uniprot_all.fasta:blastp/wFol04200.out"
     gene            59466..59840
                     /locus_tag="wFol_00450"
     CDS             59466..59840
                     /locus_tag="wFol_00450"
                     /product="30S ribosomal protein S12"
                     /note="Uniprot:Q4EAZ5"
                     /gene="rpsL"
                     /fasta_file="/home/lisa/Wolbachia_genomes/Genome_seqs/9_wol_genomes.faa:fasta/wFol04190.fasta.out"
                     /blastp_file="uniprot_all.fasta:blastp/wFol04190.out"
     gene            59847..60326
                     /locus_tag="wFol_00460"
     CDS             59847..60326
                     /locus_tag="wFol_00460"
                     /product="30S ribosomal protein S7"
                     /note="Uniprot:M9WYZ5"
                     /gene="rpsG"
                     /fasta_file="/home/lisa/Wolbachia_genomes/Genome_seqs/9_wol_genomes.faa:fasta/wFol04180.fasta.out"
                     /blastp_file="uniprot_all.fasta:blastp/wFol04180.out"
     gene            60348..62423
                     /locus_tag="wFol_00470"
     CDS             60348..62423
                     /locus_tag="wFol_00470"
                     /product="Elongation factor G"
                     /note="Uniprot:A0A098AQI9"
                     /gene="fusA"
                     /fasta_file="/home/lisa/Wolbachia_genomes/Genome_seqs/9_wol_genomes.faa:fasta/wFol04170.fasta.out"
                     /blastp_file="uniprot_all.fasta:blastp/wFol04170.out"
     gene            62435..63607
                     /locus_tag="wFol_00480"
     CDS             62435..63607
                     /locus_tag="wFol_00480"
                     /product="Elongation factor Tu"
                     /note="Uniprot:M9WUL7"
                     /gene="tuf"
                     /fasta_file="/home/lisa/Wolbachia_genomes/Genome_seqs/9_wol_genomes.faa:fasta/wFol04160.fasta.out"
                     /blastp_file="uniprot_all.fasta:blastp/wFol04160.out"
     tRNA            63613..63685
                     /ID="tRNA:Trp"
                     /Codon="CCA"
                     /score=75.39
                     /Name="tRNA:Trp"
                     /AminoAcid="Trp"
     gene            63895..64731
                     /locus_tag="wFol_00490"
     CDS             63895..64731
                     /locus_tag="wFol_00490"
                     /product="Transcription termination/antitermination
                     protein NusG"
                     /note="Uniprot:A0A098ASA4"
                     /gene="nusG"
                     /fasta_file="/home/lisa/Wolbachia_genomes/Genome_seqs/9_wol_genomes.faa:fasta/wFol04150.fasta.out"
                     /blastp_file="uniprot_all.fasta:blastp/wFol04150.out"
     gene            64734..65174
                     /locus_tag="wFol_00500"
     CDS             64734..65174
                     /locus_tag="wFol_00500"
                     /product="50S ribosomal protein L11"
                     /note="Uniprot:M9WZ01"
                     /gene="rplK"
                     /fasta_file="/home/lisa/Wolbachia_genomes/Genome_seqs/9_wol_genomes.faa:fasta/wFol04140.fasta.out"
                     /blastp_file="uniprot_all.fasta:blastp/wFol04140.out"
     gene            65179..65841
                     /locus_tag="wFol_00510"
     CDS             65179..65841
                     /locus_tag="wFol_00510"
                     /product="50S ribosomal protein L1"
                     /note="Uniprot:M9WYD6"
                     /gene="rplA"
                     /fasta_file="/home/lisa/Wolbachia_genomes/Genome_seqs/9_wol_genomes.faa:fasta/wFol04130.fasta.out"
                     /blastp_file="uniprot_all.fasta:blastp/wFol04130.out"
     gene            65854..66372
                     /locus_tag="wFol_00520"
     CDS             65854..66372
                     /locus_tag="wFol_00520"
                     /product="50S ribosomal protein L10"
                     /note="Uniprot:A0A098AQJ1"
                     /gene="rplJ"
                     /fasta_file="/home/lisa/Wolbachia_genomes/Genome_seqs/9_wol_genomes.faa:fasta/wFol04120.fasta.out"
                     /blastp_file="uniprot_all.fasta:blastp/wFol04120.out"
     gene            66399..66794
                     /locus_tag="wFol_00530"
     CDS             66399..66794
                     /locus_tag="wFol_00530"
                     /product="50S ribosomal protein L7/L12"
                     /note="Uniprot:M9WT71"
                     /gene="rplL"
                     /fasta_file="/home/lisa/Wolbachia_genomes/Genome_seqs/9_wol_genomes.faa:fasta/wFol04110.fasta.out"
                     /blastp_file="uniprot_all.fasta:blastp/wFol04110.out"
     gene            66861..75386
                     /locus_tag="wFol_00540"
     CDS             66861..75386
                     /locus_tag="wFol_00540"
                     /product="DNA-directed RNA polymerase subunit beta"
                     /note="Uniprot:A0A178GV38"
                     /gene="rpoBC"
                     /fasta_file="/home/lisa/Wolbachia_genomes/Genome_seqs/9_wol_genomes.faa:fasta/wFol04100.fasta.out"
                     /blastp_file="uniprot_all.fasta:blastp/wFol04100.out"
     gene            complement(75680..76804)
                     /locus_tag="wFol_00550"
     CDS             complement(75680..76804)
                     /locus_tag="wFol_00550"
                     /product="Transposase, IS4 family"
                     /note="IS4Sa group"
                     /note="Uniprot:A0A0P6NQA5"
                     /fasta_file="/home/lisa/Wolbachia_genomes/Genome_seqs/9_wol_genomes.faa:fasta/wFol04090.fasta.out"
                     /blastp_file="uniprot_all.fasta:blastp/wFol04090.out"
     gene            complement(77241..78386)
                     /locus_tag="wFol_00560"
     CDS             complement(77241..78386)
                     /locus_tag="wFol_00560"
                     /product="Chaperone protein DnaJ"
                     /note="Uniprot:Q73IV4"
                     /gene="dnaJ"
                     /fasta_file="/home/lisa/Wolbachia_genomes/Genome_seqs/9_wol_genomes.faa:fasta/wFol04070.fasta.out"
                     /blastp_file="uniprot_all.fasta:blastp/wFol04070.out"
     tRNA            complement(78476..78553)
                     /ID="tRNA:Arg"
                     /Codon="ACG"
                     /score=82.14
                     /Name="tRNA:Arg"
                     /AminoAcid="Arg"
     gene            78864..79793
                     /locus_tag="wFol_00570"
     CDS             78864..79793
                     /locus_tag="wFol_00570"
                     /product="Putative membrane transport protein"
                     /note="Uniprot:A0A178GTN5"
                     /fasta_file="/home/lisa/Wolbachia_genomes/Genome_seqs/9_wol_genomes.faa:fasta/wFol04060.fasta.out"
                     /blastp_file="uniprot_all.fasta:blastp/wFol04060.out"
     gene            80176..80658
                     /locus_tag="wFol_00580"
     CDS             80176..80658
                     /locus_tag="wFol_00580"
                     /product="Uncharacterized protein"
                     /note="Uniprot:M9X0A4"
                     /fasta_file="/home/lisa/Wolbachia_genomes/Genome_seqs/9_wol_genomes.faa:fasta/wFol04050.fasta.out"
                     /blastp_file="uniprot_all.fasta:blastp/wFol04050.out"
     gene            81353..82117
                     /locus_tag="wFol_00590"
     CDS             81353..82117
                     /locus_tag="wFol_00590"
                     /product="Cytochrome c oxidase subunit 2"
                     /note="Uniprot:Q73I77"
                     /gene="coxB"
                     /fasta_file="/home/lisa/Wolbachia_genomes/Genome_seqs/9_wol_genomes.faa:fasta/wFol04040.fasta.out"
                     /blastp_file="uniprot_all.fasta:blastp/wFol04040.out"
     gene            82133..83683
                     /locus_tag="wFol_00600"
     CDS             82133..83683
                     /locus_tag="wFol_00600"
                     /product="Cytochrome C oxidase subunit I"
                     /note="Uniprot:A0A176Q8X3"
                     /gene="coxA"
                     /fasta_file="/home/lisa/Wolbachia_genomes/Genome_seqs/9_wol_genomes.faa:fasta/wFol04030.fasta.out"
                     /blastp_file="uniprot_all.fasta:blastp/wFol04030.out"
     gene            83685..84572
                     /locus_tag="wFol_00610"
     CDS             83685..84572
                     /locus_tag="wFol_00610"
                     /product="Protoheme IX farnesyltransferase"
                     /note="Uniprot:A0A098AQW4"
                     /gene="ctaB"
                     /fasta_file="/home/lisa/Wolbachia_genomes/Genome_seqs/9_wol_genomes.faa:fasta/wFol04020.fasta.out"
                     /blastp_file="uniprot_all.fasta:blastp/wFol04020.out"
     gene            85045..85617
                     /locus_tag="wFol_00620"
     CDS             85045..85617
                     /locus_tag="wFol_00620"
                     /product="Transposase, IS110 family"
                     /note="no group"
                     /note="Uniprot:C0F949"
                     /fasta_file="/home/lisa/Wolbachia_genomes/Genome_seqs/9_wol_genomes.faa:fasta/wFol04010.fasta.out"
                     /blastp_file="uniprot_all.fasta:blastp/wFol04010.out"
     gene            85623..86012
                     /locus_tag="wFol_00630"
     CDS             85623..86012
                     /locus_tag="wFol_00630"
                     /product="Transposase, IS110 family"
                     /note="no group"
                     /note="Uniprot:C0F949"
                     /fasta_file="/home/lisa/Wolbachia_genomes/Genome_seqs/9_wol_genomes.faa:fasta/wFol04000.fasta.out"
                     /blastp_file="uniprot_all.fasta:blastp/wFol04000.out"
     gene            complement(join(86187..86915,88457..88855))
                     /locus_tag="wFol_00640"
                     /note="Transposase, IS4 family, disrupted by IS-insertion"
                     /note="group IS4Sa"
                     /note="Uniprot:A0A0P6NQA5"
                     /fasta_file="/home/lisa/Wolbachia_genomes/Genome_seqs/9_wol_genomes.faa:fasta/wFol03970.fasta.out"
                     /fasta_file="/home/lisa/Wolbachia_genomes/Genome_seqs/9_wol_genomes.faa:fasta/wFol03990.fasta.out"
                     /blastp_file="uniprot_all.fasta:blastp/wFol03970.out"
                     /blastp_file="uniprot_all.fasta:blastp/wFol03990.out"
                     /pseudo
     gene            complement(86985..88442)
                     /locus_tag="wFol_00650"
     CDS             complement(86985..88442)
                     /locus_tag="wFol_00650"
                     /product="Transposase, IS4 family"
                     /note="group IS50"
                     /note="Uniprot:A0A178GTG4"
                     /fasta_file="/home/lisa/Wolbachia_genomes/Genome_seqs/9_wol_genomes.faa:fasta/wFol03980.fasta.out"
                     /blastp_file="uniprot_all.fasta:blastp/wFol03980.out"
     gene            complement(89157..90896)
                     /locus_tag="wFol_00670"
     CDS             complement(89157..90896)
                     /locus_tag="wFol_00670"
                     /product="Single-stranded-DNA-specific exonuclease RecJ"
                     /note="Uniprot:A0A178GS42"
                     /gene="recJ"
                     /fasta_file="/home/lisa/Wolbachia_genomes/Genome_seqs/9_wol_genomes.faa:fasta/wFol03960.fasta.out"
                     /blastp_file="uniprot_all.fasta:blastp/wFol03960.out"
     gene            complement(91467..93299)
                     /locus_tag="wFol_00680"
     CDS             complement(91467..93299)
                     /locus_tag="wFol_00680"
                     /product="ATP-dependent zinc metalloprotease FtsH"
                     /note="Uniprot:M9WVQ4"
                     /gene="ftsH"
                     /fasta_file="/home/lisa/Wolbachia_genomes/Genome_seqs/9_wol_genomes.faa:fasta/wFol03950.fasta.out"
                     /blastp_file="uniprot_all.fasta:blastp/wFol03950.out"
     gene            complement(93557..94024)
                     /locus_tag="wFol_00690"
     CDS             complement(93557..94024)
                     /locus_tag="wFol_00690"
                     /product="Bacterioferritin comigratory protein"
                     /note="Uniprot:A0A060PX07"
                     /gene="bcp"
                     /fasta_file="/home/lisa/Wolbachia_genomes/Genome_seqs/9_wol_genomes.faa:fasta/wFol03940.fasta.out"
                     /blastp_file="uniprot_all.fasta:blastp/wFol03940.out"
     gene            complement(94180..94569)
                     /locus_tag="wFol_00700"
     CDS             complement(94180..94569)
                     /locus_tag="wFol_00700"
                     /product="Putative type IV secretion system protein VirB2"
                     /note="Uniprot:M9WRH4"
                     /fasta_file="/home/lisa/Wolbachia_genomes/Genome_seqs/9_wol_genomes.faa:fasta/wFol03930.fasta.out"
                     /blastp_file="uniprot_all.fasta:blastp/wFol03930.out"
     gene            complement(94683..95045)
                     /locus_tag="wFol_00710"
     CDS             complement(94683..95045)
                     /locus_tag="wFol_00710"
                     /product="Putative type IV secretion system protein VirB2"
                     /note="Uniprot:A0A178GWV4"
                     /fasta_file="/home/lisa/Wolbachia_genomes/Genome_seqs/9_wol_genomes.faa:fasta/wFol03920.fasta.out"
                     /blastp_file="uniprot_all.fasta:blastp/wFol03920.out"
     gene            complement(95139..95873)
                     /locus_tag="wFol_00720"
     CDS             complement(95139..95873)
                     /locus_tag="wFol_00720"
                     /product="3-oxoacyl-(Acyl-carrier-protein) reductase"
                     /note="Uniprot:M9WY47"
                     /gene="fabG"
                     /fasta_file="/home/lisa/Wolbachia_genomes/Genome_seqs/9_wol_genomes.faa:fasta/wFol03910.fasta.out"
                     /blastp_file="uniprot_all.fasta:blastp/wFol03910.out"
     gene            96154..98451
                     /locus_tag="wFol_00730"
     CDS             96154..98451
                     /locus_tag="wFol_00730"
                     /product="Uncharacterized protein"
                     /note="Uniprot:A0A178GUY0"
                     /fasta_file="/home/lisa/Wolbachia_genomes/Genome_seqs/9_wol_genomes.faa:fasta/wFol03900.fasta.out"
                     /blastp_file="uniprot_all.fasta:blastp/wFol03900.out"
     gene            98456..100735
                     /locus_tag="wFol_00740"
     CDS             98456..100735
                     /locus_tag="wFol_00740"
                     /product="Putative membrane protein"
                     /fasta_file="/home/lisa/Wolbachia_genomes/Genome_seqs/9_wol_genomes.faa:fasta/wFol03890.fasta.out"
                     /blastp_file="uniprot_all.fasta:blastp/wFol03890.out"
     gene            complement(100897..102087)
                     /locus_tag="wFol_00750"
     CDS             complement(100897..102087)
                     /locus_tag="wFol_00750"
                     /product="Transposase, IS4 family"
                     /note="group IS50"
                     /note="Uniprot:A0A178GTG4"
                     /fasta_file="/home/lisa/Wolbachia_genomes/Genome_seqs/9_wol_genomes.faa:fasta/wFol03880.fasta.out"
                     /blastp_file="uniprot_all.fasta:blastp/wFol03880.out"
     gene            complement(102065..102814)
                     /locus_tag="wFol_00760"
     CDS             complement(102065..102814)
                     /locus_tag="wFol_00760"
                     /product="Transposase, IS5 family"
                     /note="group IS427"
                     /note="Uniprot:A0A178GTR6"
                     /fasta_file="/home/lisa/Wolbachia_genomes/Genome_seqs/9_wol_genomes.faa:fasta/wFol03870.fasta.out"
                     /blastp_file="uniprot_all.fasta:blastp/wFol03870.out"
     gene            complement(102894..103238)
                     /locus_tag="wFol_00770"
     CDS             complement(102894..103238)
                     /locus_tag="wFol_00770"
                     /product="Transposase, IS4 family"
                     /note="group IS50"
                     /note="Uniprot:A0A178GTG4"
                     /fasta_file="/home/lisa/Wolbachia_genomes/Genome_seqs/9_wol_genomes.faa:fasta/wFol03860.fasta.out"
                     /blastp_file="uniprot_all.fasta:blastp/wFol03860.out"
     gene            103316..104800
                     /locus_tag="wFol_00780"
                     /note="Uncharacterized protein, contains frameshift
                     mutation and disrupted by IS-insertion"
                     /note="Uniprot:A0A178GUY0"
                     /fasta_file="/home/lisa/Wolbachia_genomes/Genome_seqs/9_wol_genomes.faa:fasta/wFol03840.fasta.out"
                     /fasta_file="/home/lisa/Wolbachia_genomes/Genome_seqs/9_wol_genomes.faa:fasta/wFol03850.fasta.out"
                     /blastp_file="uniprot_all.fasta:blastp/wFol03840.out"
                     /blastp_file="uniprot_all.fasta:blastp/wFol03850.out"
                     /pseudo
     gene            105289..107517
                     /locus_tag="wFol_00790"
     CDS             105289..107517
                     /locus_tag="wFol_00790"
                     /product="Uncharacterized protein"
                     /note="Uniprot:A0A060Q4A4"
                     /fasta_file="/home/lisa/Wolbachia_genomes/Genome_seqs/9_wol_genomes.faa:fasta/wFol03830.fasta.out"
                     /blastp_file="uniprot_all.fasta:blastp/wFol03830.out"
     gene            107521..109953
                     /locus_tag="wFol_00800"
     CDS             107521..109953
                     /locus_tag="wFol_00800"
                     /product="DnaJ domain protein"
                     /note="Uniprot:A0A060Q4A4"
                     /fasta_file="/home/lisa/Wolbachia_genomes/Genome_seqs/9_wol_genomes.faa:fasta/wFol03820.fasta.out"
                     /blastp_file="uniprot_all.fasta:blastp/wFol03820.out"
     gene            109958..112231
                     /locus_tag="wFol_00810"
     CDS             109958..112231
                     /locus_tag="wFol_00810"
                     /product="DnaJ domain protein"
                     /note="Uniprot:A0A178GUY0"
                     /fasta_file="/home/lisa/Wolbachia_genomes/Genome_seqs/9_wol_genomes.faa:fasta/wFol03810.fasta.out"
                     /blastp_file="uniprot_all.fasta:blastp/wFol03810.out"
     tRNA            complement(112287..112376)
                     /ID="tRNA:Ser"
                     /Codon="GGA"
                     /score=71.44
                     /Name="tRNA:Ser"
                     /AminoAcid="Ser"
     gene            112508..113614
                     /locus_tag="wFol_00820"
     CDS             112508..113614
                     /locus_tag="wFol_00820"
                     /product="Ankyrin repeat domain protein"
                     /note="Uniprot:C0R5T6"
                     /fasta_file="/home/lisa/Wolbachia_genomes/Genome_seqs/9_wol_genomes.faa:fasta/wFol03800.fasta.out"
                     /blastp_file="uniprot_all.fasta:blastp/wFol03800.out"
     gene            113685..115805
                     /locus_tag="wFol_00830"
     CDS             113685..115805
                     /locus_tag="wFol_00830"
                     /product="Propionyl-CoA carboxylase, alpha subunit"
                     /note="Uniprot:M9WU35"
                     /gene="pccA"
                     /fasta_file="/home/lisa/Wolbachia_genomes/Genome_seqs/9_wol_genomes.faa:fasta/wFol03790.fasta.out"
                     /blastp_file="uniprot_all.fasta:blastp/wFol03790.out"
     gene            116001..116504
                     /locus_tag="wFol_00840"
     CDS             116001..116504
                     /locus_tag="wFol_00840"
                     /product="Thiol:disulfide interchange protein DsbC"
                     /note="Uniprot:Q5GST4"
                     /gene="dsbC"
                     /fasta_file="/home/lisa/Wolbachia_genomes/Genome_seqs/9_wol_genomes.faa:fasta/wFol03780.fasta.out"
                     /blastp_file="uniprot_all.fasta:blastp/wFol03780.out"
     gene            complement(116563..117477)
                     /locus_tag="wFol_00850"
     CDS             complement(116563..117477)
                     /locus_tag="wFol_00850"
                     /product="Signal recognition particle receptor FtsY"
                     /note="Uniprot:A0A0P6NXL0"
                     /gene="ftsY"
                     /fasta_file="/home/lisa/Wolbachia_genomes/Genome_seqs/9_wol_genomes.faa:fasta/wFol03770.fasta.out"
                     /blastp_file="uniprot_all.fasta:blastp/wFol03770.out"
     gene            117613..118806
                     /locus_tag="wFol_00860"
     CDS             117613..118806
                     /locus_tag="wFol_00860"
                     /product="Bifunctional enzyme IspD/IspF"
                     /note="Uniprot:A0A178GS80"
                     /gene="ispDF"
                     /fasta_file="/home/lisa/Wolbachia_genomes/Genome_seqs/9_wol_genomes.faa:fasta/wFol03760.fasta.out"
                     /blastp_file="uniprot_all.fasta:blastp/wFol03760.out"
     gene            118898..120805
                     /locus_tag="wFol_00870"
     CDS             118898..120805
                     /locus_tag="wFol_00870"
                     /product="Molecular chaperone HtpG"
                     /note="Uniprot:A0A176Q7X6"
                     /gene="htpG"
                     /fasta_file="/home/lisa/Wolbachia_genomes/Genome_seqs/9_wol_genomes.faa:fasta/wFol03750.fasta.out"
                     /blastp_file="uniprot_all.fasta:blastp/wFol03750.out"
     gene            120846..121757
                     /locus_tag="wFol_00880"
     CDS             120846..121757
                     /locus_tag="wFol_00880"
                     /product="Uncharacterized protein"
                     /note="Uniprot:A0A176Q7Y4"
                     /fasta_file="/home/lisa/Wolbachia_genomes/Genome_seqs/9_wol_genomes.faa:fasta/wFol03740.fasta.out"
                     /blastp_file="uniprot_all.fasta:blastp/wFol03740.out"
     gene            121871..124537
                     /locus_tag="wFol_00890"
     CDS             121871..124537
                     /locus_tag="wFol_00890"
                     /product="ARM repeat superfamily protein"
                     /note="Uniprot:Q73FP8"
                     /fasta_file="/home/lisa/Wolbachia_genomes/Genome_seqs/9_wol_genomes.faa:fasta/wFol03730.fasta.out"
                     /blastp_file="uniprot_all.fasta:blastp/wFol03730.out"
     gene            124611..125825
                     /locus_tag="wFol_00900"
     CDS             124611..125825
                     /locus_tag="wFol_00900"
                     /product="5-aminolevulinate synthase"
                     /note="Uniprot:Q73FP7"
                     /gene="hemA"
                     /fasta_file="/home/lisa/Wolbachia_genomes/Genome_seqs/9_wol_genomes.faa:fasta/wFol03720.fasta.out"
                     /blastp_file="uniprot_all.fasta:blastp/wFol03720.out"
     gene            125983..127761
                     /locus_tag="wFol_00910"
     CDS             125983..127761
                     /locus_tag="wFol_00910"
                     /product="Putative membrane protein"
                     /note="Uniprot:M9WUT4"
                     /fasta_file="/home/lisa/Wolbachia_genomes/Genome_seqs/9_wol_genomes.faa:fasta/wFol03710.fasta.out"
                     /blastp_file="uniprot_all.fasta:blastp/wFol03710.out"
     gene            complement(128070..128516)
                     /locus_tag="wFol_00920"
     CDS             complement(128070..128516)
                     /locus_tag="wFol_00920"
                     /product="3-hydroxyacyl-[acyl-carrier-protein] dehydratase
                     FabZ"
                     /note="Uniprot:A0A178GU70"
                     /gene="fabZ"
                     /fasta_file="/home/lisa/Wolbachia_genomes/Genome_seqs/9_wol_genomes.faa:fasta/wFol03700.fasta.out"
                     /blastp_file="uniprot_all.fasta:blastp/wFol03700.out"
     gene            complement(128525..129085)
                     /locus_tag="wFol_00930"
     CDS             complement(128525..129085)
                     /locus_tag="wFol_00930"
                     /product="Outer membrane protein"
                     /note="Uniprot:M9WPT5"
                     /fasta_file="/home/lisa/Wolbachia_genomes/Genome_seqs/9_wol_genomes.faa:fasta/wFol03690.fasta.out"
                     /blastp_file="uniprot_all.fasta:blastp/wFol03690.out"
     gene            complement(129086..131392)
                     /locus_tag="wFol_00940"
     CDS             complement(129086..131392)
                     /locus_tag="wFol_00940"
                     /product="Outer membrane protein assembly factor BamA"
                     /note="Uniprot:M9X188"
                     /gene="bamA"
                     /fasta_file="/home/lisa/Wolbachia_genomes/Genome_seqs/9_wol_genomes.faa:fasta/wFol03680.fasta.out"
                     /blastp_file="uniprot_all.fasta:blastp/wFol03680.out"
     gene            complement(131401..132525)
                     /locus_tag="wFol_00950"
     CDS             complement(131401..132525)
                     /locus_tag="wFol_00950"
                     /product="Zinc metalloprotease"
                     /note="Uniprot:A0A098ATE7"
                     /gene="mmpA"
                     /fasta_file="/home/lisa/Wolbachia_genomes/Genome_seqs/9_wol_genomes.faa:fasta/wFol03670.fasta.out"
                     /blastp_file="uniprot_all.fasta:blastp/wFol03670.out"
     gene            132625..132903
                     /locus_tag="wFol_00960"
     CDS             132625..132903
                     /locus_tag="wFol_00960"
                     /product="Putative flavinator of succinate dehydrogenase
                     Sdh5"
                     /note="Uniprot:Q73G75"
                     /fasta_file="/home/lisa/Wolbachia_genomes/Genome_seqs/9_wol_genomes.faa:fasta/wFol03660.fasta.out"
                     /blastp_file="uniprot_all.fasta:blastp/wFol03660.out"
     gene            complement(132953..133909)
                     /locus_tag="wFol_00970"
     CDS             complement(132953..133909)
                     /locus_tag="wFol_00970"
                     /product="Uncharacterized protein"
                     /note="Uniprot:A0A0N8FF34"
                     /fasta_file="/home/lisa/Wolbachia_genomes/Genome_seqs/9_wol_genomes.faa:fasta/wFol03650.fasta.out"
                     /blastp_file="uniprot_all.fasta:blastp/wFol03650.out"
     gene            complement(134071..134397)
                     /locus_tag="wFol_00980"
     CDS             complement(134071..134397)
                     /locus_tag="wFol_00980"
                     /product="Cell division protein ZapA"
                     /note="Uniprot:Q73G74"
                     /gene="zapA"
                     /fasta_file="/home/lisa/Wolbachia_genomes/Genome_seqs/9_wol_genomes.faa:fasta/wFol03640.fasta.out"
                     /blastp_file="uniprot_all.fasta:blastp/wFol03640.out"
     gene            complement(134844..135122)
                     /locus_tag="wFol_00990"
     CDS             complement(134844..135122)
                     /locus_tag="wFol_00990"
                     /product="DNA-binding protein, HU family"
                     /note="Uniprot:Q73G73"
                     /fasta_file="/home/lisa/Wolbachia_genomes/Genome_seqs/9_wol_genomes.faa:fasta/wFol03630.fasta.out"
                     /blastp_file="uniprot_all.fasta:blastp/wFol03630.out"
     gene            complement(135150..136799)
                     /locus_tag="wFol_01000"
     CDS             complement(135150..136799)
                     /locus_tag="wFol_01000"
                     /product="30S ribosomal protein S1"
                     /note="Uniprot:A0A178GSX8"
                     /gene="rpsA"
                     /fasta_file="/home/lisa/Wolbachia_genomes/Genome_seqs/9_wol_genomes.faa:fasta/wFol03620.fasta.out"
                     /blastp_file="uniprot_all.fasta:blastp/wFol03620.out"
     gene            136956..137609
                     /locus_tag="wFol_01010"
     CDS             136956..137609
                     /locus_tag="wFol_01010"
                     /product="tRNA (guanine-N(7)-)-methyltransferase"
                     /note="Uniprot:M9X0G2"
                     /gene="trmB"
                     /fasta_file="/home/lisa/Wolbachia_genomes/Genome_seqs/9_wol_genomes.faa:fasta/wFol03610.fasta.out"
                     /blastp_file="uniprot_all.fasta:blastp/wFol03610.out"
     gene            137654..138358
                     /locus_tag="wFol_01020"
     CDS             137654..138358
                     /locus_tag="wFol_01020"
                     /product="Integral membrane protein, TerC family"
                     /note="Uniprot:A0A178GY74"
                     /fasta_file="/home/lisa/Wolbachia_genomes/Genome_seqs/9_wol_genomes.faa:fasta/wFol03600.fasta.out"
                     /blastp_file="uniprot_all.fasta:blastp/wFol03600.out"
     gene            138469..138981
                     /locus_tag="wFol_01030"
     CDS             138469..138981
                     /locus_tag="wFol_01030"
                     /product="Unique protein"
                     /fasta_file="/home/lisa/Wolbachia_genomes/Genome_seqs/9_wol_genomes.faa:fasta/wFol03590.fasta.out"
                     /blastp_file="uniprot_all.fasta:blastp/wFol03590.out"
     tRNA            complement(139401..139474)
                     /ID="tRNA:Met"
                     /Codon="CAT"
                     /score=85.64
                     /Name="tRNA:Met"
                     /AminoAcid="Met"
     gene            complement(139518..139841)
                     /locus_tag="wFol_01040"
     CDS             complement(139518..139841)
                     /locus_tag="wFol_01040"
                     /product="Thioredoxin"
                     /note="Uniprot:A0A178GVG2"
                     /gene="trx"
                     /fasta_file="/home/lisa/Wolbachia_genomes/Genome_seqs/9_wol_genomes.faa:fasta/wFol03570.fasta.out"
                     /blastp_file="uniprot_all.fasta:blastp/wFol03570.out"
     gene            complement(139979..140806)
                     /locus_tag="wFol_01050"
     CDS             complement(139979..140806)
                     /locus_tag="wFol_01050"
                     /product="Coproporphyrinogen III oxidase"
                     /note="Uniprot:C0F9W8"
                     /fasta_file="/home/lisa/Wolbachia_genomes/Genome_seqs/9_wol_genomes.faa:fasta/wFol03560.fasta.out"
                     /blastp_file="uniprot_all.fasta:blastp/wFol03560.out"
     gene            complement(140812..142569)
                     /locus_tag="wFol_01060"
     CDS             complement(140812..142569)
                     /locus_tag="wFol_01060"
                     /product="Unique protein"
                     /fasta_file="/home/lisa/Wolbachia_genomes/Genome_seqs/9_wol_genomes.faa:fasta/wFol03550.fasta.out"
                     /blastp_file="uniprot_all.fasta:blastp/wFol03550.out"
     gene            complement(142686..144443)
                     /locus_tag="wFol_01070"
     CDS             complement(142686..144443)
                     /locus_tag="wFol_01070"
                     /product="Unique protein"
                     /fasta_file="/home/lisa/Wolbachia_genomes/Genome_seqs/9_wol_genomes.faa:fasta/wFol03540.fasta.out"
                     /blastp_file="uniprot_all.fasta:blastp/wFol03540.out"
     gene            complement(144551..146329)
                     /locus_tag="wFol_01080"
     CDS             complement(144551..146329)
                     /locus_tag="wFol_01080"
                     /product="Unique protein"
                     /fasta_file="/home/lisa/Wolbachia_genomes/Genome_seqs/9_wol_genomes.faa:fasta/wFol03530.fasta.out"
                     /blastp_file="uniprot_all.fasta:blastp/wFol03530.out"
     gene            complement(146446..146991)
                     /locus_tag="wFol_01090"
     CDS             complement(146446..146991)
                     /locus_tag="wFol_01090"
                     /product="Putative membrane protein"
                     /fasta_file="/home/lisa/Wolbachia_genomes/Genome_seqs/9_wol_genomes.faa:fasta/wFol03520.fasta.out"
                     /blastp_file="uniprot_all.fasta:blastp/wFol03520.out"
     gene            147296..149764
                     /locus_tag="wFol_01100"
     CDS             147296..149764
                     /locus_tag="wFol_01100"
                     /product="Sensor histidine kinase/response regulator"
                     /note="Uniprot:C0F9W7"
                     /fasta_file="/home/lisa/Wolbachia_genomes/Genome_seqs/9_wol_genomes.faa:fasta/wFol03510.fasta.out"
                     /blastp_file="uniprot_all.fasta:blastp/wFol03510.out"
     gene            complement(149943..150203)
                     /locus_tag="wFol_01110"
     CDS             complement(149943..150203)
                     /locus_tag="wFol_01110"
                     /product="Putative nuclease, GIY-YIG family"
                     /note="Uniprot:A0A176Q780"
                     /fasta_file="/home/lisa/Wolbachia_genomes/Genome_seqs/9_wol_genomes.faa:fasta/wFol03500.fasta.out"
                     /blastp_file="uniprot_all.fasta:blastp/wFol03500.out"
     gene            complement(150269..150658)
                     /locus_tag="wFol_01120"
     CDS             complement(150269..150658)
                     /locus_tag="wFol_01120"
                     /product="Transposase, IS110 family"
                     /note="no group"
                     /note="Uniprot:C0F949"
                     /fasta_file="/home/lisa/Wolbachia_genomes/Genome_seqs/9_wol_genomes.faa:fasta/wFol03490.fasta.out"
                     /blastp_file="uniprot_all.fasta:blastp/wFol03490.out"
     gene            complement(150664..151236)
                     /locus_tag="wFol_01130"
     CDS             complement(150664..151236)
                     /locus_tag="wFol_01130"
                     /product="Transposase, IS110 family"
                     /note="no group"
                     /note="Uniprot:C0F949"
                     /fasta_file="/home/lisa/Wolbachia_genomes/Genome_seqs/9_wol_genomes.faa:fasta/wFol03480.fasta.out"
                     /blastp_file="uniprot_all.fasta:blastp/wFol03480.out"
     gene            151606..152802
                     /locus_tag="wFol_01140"
     CDS             151606..152802
                     /locus_tag="wFol_01140"
                     /product="1-deoxy-D-xylulose 5-phosphate reductoisomerase"
                     /note="Uniprot:A0A060PYI1"
                     /gene="dxr"
                     /fasta_file="/home/lisa/Wolbachia_genomes/Genome_seqs/9_wol_genomes.faa:fasta/wFol03460.fasta.out"
                     /blastp_file="uniprot_all.fasta:blastp/wFol03460.out"
     gene            complement(152761..153555)
                     /locus_tag="wFol_01150"
     CDS             complement(152761..153555)
                     /locus_tag="wFol_01150"
                     /product="Putative aminomethyltransferase"
                     /note="Uniprot:M9WS52"
                     /fasta_file="/home/lisa/Wolbachia_genomes/Genome_seqs/9_wol_genomes.faa:fasta/wFol03450.fasta.out"
                     /blastp_file="uniprot_all.fasta:blastp/wFol03450.out"
     gene            153698..153988
                     /locus_tag="wFol_01160"
     CDS             153698..153988
                     /locus_tag="wFol_01160"
                     /product="10 kDa chaperonin"
                     /note="Uniprot:A0A178GTF0"
                     /gene="groS"
                     /fasta_file="/home/lisa/Wolbachia_genomes/Genome_seqs/9_wol_genomes.faa:fasta/wFol03440.fasta.out"
                     /blastp_file="uniprot_all.fasta:blastp/wFol03440.out"
     gene            154086..155738
                     /locus_tag="wFol_01170"
     CDS             154086..155738
                     /locus_tag="wFol_01170"
                     /product="60 kDa chaperonin"
                     /note="Uniprot:A0A178GTN1"
                     /gene="groL"
                     /fasta_file="/home/lisa/Wolbachia_genomes/Genome_seqs/9_wol_genomes.faa:fasta/wFol03430.fasta.out"
                     /blastp_file="uniprot_all.fasta:blastp/wFol03430.out"
     gene            155979..156134
                     /locus_tag="wFol_01180"
                     /note="GIY-YIG nuclease, truncation"
                     /note="Uniprot:A0A178GVQ1"
                     /fasta_file="/home/lisa/Wolbachia_genomes/Genome_seqs/9_wol_genomes.faa:fasta/wFol03420.fasta.out"
                     /blastp_file="uniprot_all.fasta:blastp/wFol03420.out"
                     /pseudo
     gene            157273..158220
                     /locus_tag="wFol_01190"
     CDS             157273..158220
                     /locus_tag="wFol_01190"
                     /product="ABC-type transporter, permease protein"
                     /note="Uniprot:C0FA43"
                     /fasta_file="/home/lisa/Wolbachia_genomes/Genome_seqs/9_wol_genomes.faa:fasta/wFol03400.fasta.out"
                     /blastp_file="uniprot_all.fasta:blastp/wFol03400.out"
     gene            158290..159744
                     /locus_tag="wFol_01200"
     CDS             158290..159744
                     /locus_tag="wFol_01200"
                     /product="ATP synthase subunit beta"
                     /note="Uniprot:A0A098ARJ0"
                     /gene="atpD"
                     /fasta_file="/home/lisa/Wolbachia_genomes/Genome_seqs/9_wol_genomes.faa:fasta/wFol03390.fasta.out"
                     /blastp_file="uniprot_all.fasta:blastp/wFol03390.out"
     gene            159750..160091
                     /locus_tag="wFol_01210"
     CDS             159750..160091
                     /locus_tag="wFol_01210"
                     /product="ATP synthase epsilon chain"
                     /note="Uniprot:A0A098AQQ8"
                     /gene="atpC"
                     /fasta_file="/home/lisa/Wolbachia_genomes/Genome_seqs/9_wol_genomes.faa:fasta/wFol03380.fasta.out"
                     /blastp_file="uniprot_all.fasta:blastp/wFol03380.out"
     gene            160599..161240
                     /locus_tag="wFol_01220"
     CDS             160599..161240
                     /locus_tag="wFol_01220"
                     /product="Transaldolase"
                     /note="Uniprot:A0A060Q4D8"
                     /gene="tal"
                     /fasta_file="/home/lisa/Wolbachia_genomes/Genome_seqs/9_wol_genomes.faa:fasta/wFol03370.fasta.out"
                     /blastp_file="uniprot_all.fasta:blastp/wFol03370.out"
     gene            complement(161253..161849)
                     /locus_tag="wFol_01230"
     CDS             complement(161253..161849)
                     /locus_tag="wFol_01230"
                     /product="Putative membrane protein"
                     /note="Uniprot:A0A059IVY0"
                     /fasta_file="/home/lisa/Wolbachia_genomes/Genome_seqs/9_wol_genomes.faa:fasta/wFol03360.fasta.out"
                     /blastp_file="uniprot_all.fasta:blastp/wFol03360.out"
     gene            complement(162054..162794)
                     /locus_tag="wFol_01240"
                     /note="Short-chain dehydrogenase, contains inframe stop
                     codon"
                     /note="Uniprot:A0A176Q6H9"
                     /note="Uniprot:B3CN22"
                     /fasta_file="/home/lisa/Wolbachia_genomes/Genome_seqs/9_wol_genomes.faa:fasta/wFol03330.fasta.out"
                     /fasta_file="/home/lisa/Wolbachia_genomes/Genome_seqs/9_wol_genomes.faa:fasta/wFol03340.fasta.out"
                     /blastp_file="uniprot_all.fasta:blastp/wFol03330.out"
                     /blastp_file="uniprot_all.fasta:blastp/wFol03340.out"
                     /pseudo
     gene            162988..164112
                     /locus_tag="wFol_01250"
     CDS             162988..164112
                     /locus_tag="wFol_01250"
                     /product="Carbamoyl-phosphate synthase small chain"
                     /note="Uniprot:C0R312"
                     /gene="carA"
                     /fasta_file="/home/lisa/Wolbachia_genomes/Genome_seqs/9_wol_genomes.faa:fasta/wFol03320.fasta.out"
                     /blastp_file="uniprot_all.fasta:blastp/wFol03320.out"
     tRNA            164221..164303
                     /ID="tRNA:Tyr"
                     /Codon="GTA"
                     /score=61.66
                     /Name="tRNA:Tyr"
                     /AminoAcid="Tyr"
     tRNA            164308..164378
                     /ID="tRNA:Gly-2"
                     /Codon="TCC"
                     /score=67.63
                     /Name="tRNA:Gly-2"
                     /AminoAcid="Gly-2"
     gene            164456..165628
                     /locus_tag="wFol_01260"
     CDS             164456..165628
                     /locus_tag="wFol_01260"
                     /product="Elongation factor Tu"
                     /note="Uniprot:M9WUL7"
                     /gene="tuf"
                     /fasta_file="/home/lisa/Wolbachia_genomes/Genome_seqs/9_wol_genomes.faa:fasta/wFol03310.fasta.out"
                     /blastp_file="uniprot_all.fasta:blastp/wFol03310.out"
     gene            165642..165962
                     /locus_tag="wFol_01270"
     CDS             165642..165962
                     /locus_tag="wFol_01270"
                     /product="30S ribosomal protein S10"
                     /note="Uniprot:M9WSB7"
                     /gene="rpsJ"
                     /fasta_file="/home/lisa/Wolbachia_genomes/Genome_seqs/9_wol_genomes.faa:fasta/wFol03300.fasta.out"
                     /blastp_file="uniprot_all.fasta:blastp/wFol03300.out"
     gene            165973..166695
                     /locus_tag="wFol_01280"
     CDS             165973..166695
                     /locus_tag="wFol_01280"
                     /product="50S ribosomal protein L3"
                     /note="Uniprot:A0A178GVY6"
                     /gene="rplC"
                     /fasta_file="/home/lisa/Wolbachia_genomes/Genome_seqs/9_wol_genomes.faa:fasta/wFol03290.fasta.out"
                     /blastp_file="uniprot_all.fasta:blastp/wFol03290.out"
     gene            166698..167312
                     /locus_tag="wFol_01290"
     CDS             166698..167312
                     /locus_tag="wFol_01290"
                     /product="50S ribosomal protein L4"
                     /note="Uniprot:A0A098ASG8"
                     /gene="rplD"
                     /fasta_file="/home/lisa/Wolbachia_genomes/Genome_seqs/9_wol_genomes.faa:fasta/wFol03280.fasta.out"
                     /blastp_file="uniprot_all.fasta:blastp/wFol03280.out"
     gene            167309..167596
                     /locus_tag="wFol_01300"
     CDS             167309..167596
                     /locus_tag="wFol_01300"
                     /product="50S ribosomal protein L23"
                     /note="Uniprot:M9WZR5"
                     /gene="rplW"
                     /fasta_file="/home/lisa/Wolbachia_genomes/Genome_seqs/9_wol_genomes.faa:fasta/wFol03270.fasta.out"
                     /blastp_file="uniprot_all.fasta:blastp/wFol03270.out"
     gene            167598..168422
                     /locus_tag="wFol_01310"
     CDS             167598..168422
                     /locus_tag="wFol_01310"
                     /product="50S ribosomal protein L2"
                     /note="Uniprot:A0A178GWG1"
                     /gene="rplB"
                     /fasta_file="/home/lisa/Wolbachia_genomes/Genome_seqs/9_wol_genomes.faa:fasta/wFol03260.fasta.out"
                     /blastp_file="uniprot_all.fasta:blastp/wFol03260.out"
     gene            168426..168719
                     /locus_tag="wFol_01320"
     CDS             168426..168719
                     /locus_tag="wFol_01320"
                     /product="30S ribosomal protein S19"
                     /note="Uniprot:A0A0P6NXP3"
                     /gene="rpsS"
                     /fasta_file="/home/lisa/Wolbachia_genomes/Genome_seqs/9_wol_genomes.faa:fasta/wFol03250.fasta.out"
                     /blastp_file="uniprot_all.fasta:blastp/wFol03250.out"
     gene            168725..169111
                     /locus_tag="wFol_01330"
     CDS             168725..169111
                     /locus_tag="wFol_01330"
                     /product="50S ribosomal protein L22"
                     /note="Uniprot:A0A178GUS2"
                     /gene="rplV"
                     /fasta_file="/home/lisa/Wolbachia_genomes/Genome_seqs/9_wol_genomes.faa:fasta/wFol03240.fasta.out"
                     /blastp_file="uniprot_all.fasta:blastp/wFol03240.out"
     gene            169115..169735
                     /locus_tag="wFol_01340"
     CDS             169115..169735
                     /locus_tag="wFol_01340"
                     /product="30S ribosomal protein S3"
                     /note="Uniprot:Q5GSV0"
                     /gene="rpsC"
                     /fasta_file="/home/lisa/Wolbachia_genomes/Genome_seqs/9_wol_genomes.faa:fasta/wFol03230.fasta.out"
                     /blastp_file="uniprot_all.fasta:blastp/wFol03230.out"
     gene            169750..170163
                     /locus_tag="wFol_01350"
     CDS             169750..170163
                     /locus_tag="wFol_01350"
                     /product="50S ribosomal protein L16"
                     /note="Uniprot:A0A060Q3Z8"
                     /gene="rplP"
                     /fasta_file="/home/lisa/Wolbachia_genomes/Genome_seqs/9_wol_genomes.faa:fasta/wFol03220.fasta.out"
                     /blastp_file="uniprot_all.fasta:blastp/wFol03220.out"
     gene            170175..170378
                     /locus_tag="wFol_01360"
     CDS             170175..170378
                     /locus_tag="wFol_01360"
                     /product="50S ribosomal protein L29"
                     /note="Uniprot:A0A178GU97"
                     /gene="rpmC"
                     /fasta_file="/home/lisa/Wolbachia_genomes/Genome_seqs/9_wol_genomes.faa:fasta/wFol03210.fasta.out"
                     /blastp_file="uniprot_all.fasta:blastp/wFol03210.out"
     gene            170371..170607
                     /locus_tag="wFol_01370"
     CDS             170371..170607
                     /locus_tag="wFol_01370"
                     /product="30S ribosomal protein S17"
                     /note="Uniprot:C0F8Q4"
                     /gene="rpsQ"
                     /fasta_file="/home/lisa/Wolbachia_genomes/Genome_seqs/9_wol_genomes.faa:fasta/wFol03200.fasta.out"
                     /blastp_file="uniprot_all.fasta:blastp/wFol03200.out"
     gene            170621..170980
                     /locus_tag="wFol_01380"
     CDS             170621..170980
                     /locus_tag="wFol_01380"
                     /product="50S ribosomal protein L14"
                     /note="Uniprot:M9WUJ0"
                     /gene="rplN"
                     /fasta_file="/home/lisa/Wolbachia_genomes/Genome_seqs/9_wol_genomes.faa:fasta/wFol03190.fasta.out"
                     /blastp_file="uniprot_all.fasta:blastp/wFol03190.out"
     gene            170980..171297
                     /locus_tag="wFol_01390"
     CDS             170980..171297
                     /locus_tag="wFol_01390"
                     /product="50S ribosomal protein L24"
                     /note="Uniprot:A0A098ASG0"
                     /gene="rplX"
                     /fasta_file="/home/lisa/Wolbachia_genomes/Genome_seqs/9_wol_genomes.faa:fasta/wFol03180.fasta.out"
                     /blastp_file="uniprot_all.fasta:blastp/wFol03180.out"
     gene            171304..171837
                     /locus_tag="wFol_01400"
     CDS             171304..171837
                     /locus_tag="wFol_01400"
                     /product="50S ribosomal protein L5"
                     /note="Uniprot:A0A178GUL8"
                     /gene="rplE"
                     /fasta_file="/home/lisa/Wolbachia_genomes/Genome_seqs/9_wol_genomes.faa:fasta/wFol03170.fasta.out"
                     /blastp_file="uniprot_all.fasta:blastp/wFol03170.out"
     gene            171854..172162
                     /locus_tag="wFol_01410"
     CDS             171854..172162
                     /locus_tag="wFol_01410"
                     /product="30S ribosomal protein S14"
                     /note="Uniprot:M9X0E6"
                     /gene="rpsN"
                     /fasta_file="/home/lisa/Wolbachia_genomes/Genome_seqs/9_wol_genomes.faa:fasta/wFol03160.fasta.out"
                     /blastp_file="uniprot_all.fasta:blastp/wFol03160.out"
     gene            172184..172579
                     /locus_tag="wFol_01420"
     CDS             172184..172579
                     /locus_tag="wFol_01420"
                     /product="30S ribosomal protein S8"
                     /note="Uniprot:M9WSA6"
                     /gene="rpsH"
                     /fasta_file="/home/lisa/Wolbachia_genomes/Genome_seqs/9_wol_genomes.faa:fasta/wFol03150.fasta.out"
                     /blastp_file="uniprot_all.fasta:blastp/wFol03150.out"
     gene            172596..173141
                     /locus_tag="wFol_01430"
     CDS             172596..173141
                     /locus_tag="wFol_01430"
                     /product="50S ribosomal protein L6"
                     /note="Uniprot:A0A178GUT2"
                     /gene="rplF"
                     /fasta_file="/home/lisa/Wolbachia_genomes/Genome_seqs/9_wol_genomes.faa:fasta/wFol03140.fasta.out"
                     /blastp_file="uniprot_all.fasta:blastp/wFol03140.out"
     gene            173147..173518
                     /locus_tag="wFol_01440"
     CDS             173147..173518
                     /locus_tag="wFol_01440"
                     /product="50S ribosomal protein L18"
                     /note="Uniprot:A0A178GUJ6"
                     /gene="rplR"
                     /fasta_file="/home/lisa/Wolbachia_genomes/Genome_seqs/9_wol_genomes.faa:fasta/wFol03130.fasta.out"
                     /blastp_file="uniprot_all.fasta:blastp/wFol03130.out"
     gene            173531..174043
                     /locus_tag="wFol_01450"
     CDS             173531..174043
                     /locus_tag="wFol_01450"
                     /product="30S ribosomal protein S5"
                     /note="Uniprot:M9WY32"
                     /gene="rpsE"
                     /fasta_file="/home/lisa/Wolbachia_genomes/Genome_seqs/9_wol_genomes.faa:fasta/wFol03120.fasta.out"
                     /blastp_file="uniprot_all.fasta:blastp/wFol03120.out"
     gene            174047..174517
                     /locus_tag="wFol_01460"
     CDS             174047..174517
                     /locus_tag="wFol_01460"
                     /product="50S ribosomal protein L15"
                     /note="Uniprot:Q5GSW2"
                     /gene="rplO"
                     /fasta_file="/home/lisa/Wolbachia_genomes/Genome_seqs/9_wol_genomes.faa:fasta/wFol03110.fasta.out"
                     /blastp_file="uniprot_all.fasta:blastp/wFol03110.out"
     gene            174521..175849
                     /locus_tag="wFol_01470"
     CDS             174521..175849
                     /locus_tag="wFol_01470"
                     /product="Protein translocase subunit SecY"
                     /note="Uniprot:Q73HA5"
                     /gene="secY"
                     /fasta_file="/home/lisa/Wolbachia_genomes/Genome_seqs/9_wol_genomes.faa:fasta/wFol03100.fasta.out"
                     /blastp_file="uniprot_all.fasta:blastp/wFol03100.out"
     gene            175846..176496
                     /locus_tag="wFol_01480"
     CDS             175846..176496
                     /locus_tag="wFol_01480"
                     /product="Adenylate kinase"
                     /note="Uniprot:M9WUI6"
                     /gene="adk"
                     /fasta_file="/home/lisa/Wolbachia_genomes/Genome_seqs/9_wol_genomes.faa:fasta/wFol03090.fasta.out"
                     /blastp_file="uniprot_all.fasta:blastp/wFol03090.out"
     gene            176556..176924
                     /locus_tag="wFol_01490"
     CDS             176556..176924
                     /locus_tag="wFol_01490"
                     /product="30S ribosomal protein S13"
                     /note="Uniprot:A0A178GWU4"
                     /gene="rpsM"
                     /fasta_file="/home/lisa/Wolbachia_genomes/Genome_seqs/9_wol_genomes.faa:fasta/wFol03080.fasta.out"
                     /blastp_file="uniprot_all.fasta:blastp/wFol03080.out"
     gene            176948..177334
                     /locus_tag="wFol_01500"
     CDS             176948..177334
                     /locus_tag="wFol_01500"
                     /product="30S ribosomal protein S11"
                     /note="Uniprot:A0A060Q403"
                     /gene="rpsK"
                     /fasta_file="/home/lisa/Wolbachia_genomes/Genome_seqs/9_wol_genomes.faa:fasta/wFol03070.fasta.out"
                     /blastp_file="uniprot_all.fasta:blastp/wFol03070.out"
     gene            177357..178424
                     /locus_tag="wFol_01510"
     CDS             177357..178424
                     /locus_tag="wFol_01510"
                     /product="DNA-directed RNA polymerase subunit alpha"
                     /note="Uniprot:M9X0D9"
                     /gene="rpoA"
                     /fasta_file="/home/lisa/Wolbachia_genomes/Genome_seqs/9_wol_genomes.faa:fasta/wFol03060.fasta.out"
                     /blastp_file="uniprot_all.fasta:blastp/wFol03060.out"
     gene            178432..178860
                     /locus_tag="wFol_01520"
     CDS             178432..178860
                     /locus_tag="wFol_01520"
                     /product="50S ribosomal protein L17"
                     /note="Uniprot:M9WSA1"
                     /gene="rplQ"
                     /fasta_file="/home/lisa/Wolbachia_genomes/Genome_seqs/9_wol_genomes.faa:fasta/wFol03050.fasta.out"
                     /blastp_file="uniprot_all.fasta:blastp/wFol03050.out"
     gene            178881..179252
                     /locus_tag="wFol_01530"
     CDS             178881..179252
                     /locus_tag="wFol_01530"
                     /product="Uncharacterized protein"
                     /note="Uniprot:A0A178GUU3"
                     /fasta_file="/home/lisa/Wolbachia_genomes/Genome_seqs/9_wol_genomes.faa:fasta/wFol03040.fasta.out"
                     /blastp_file="uniprot_all.fasta:blastp/wFol03040.out"
     gene            179265..179825
                     /locus_tag="wFol_01540"
     CDS             179265..179825
                     /locus_tag="wFol_01540"
                     /product="ATP synthase subunit delta"
                     /note="Uniprot:M9WVZ0"
                     /gene="atpH"
                     /fasta_file="/home/lisa/Wolbachia_genomes/Genome_seqs/9_wol_genomes.faa:fasta/wFol03030.fasta.out"
                     /blastp_file="uniprot_all.fasta:blastp/wFol03030.out"
     gene            179822..181363
                     /locus_tag="wFol_01550"
     CDS             179822..181363
                     /locus_tag="wFol_01550"
                     /product="ATP synthase subunit alpha"
                     /note="Uniprot:M9WZP6"
                     /gene="atpA"
                     /fasta_file="/home/lisa/Wolbachia_genomes/Genome_seqs/9_wol_genomes.faa:fasta/wFol03020.fasta.out"
                     /blastp_file="uniprot_all.fasta:blastp/wFol03020.out"
     gene            181373..181867
                     /locus_tag="wFol_01560"
     CDS             181373..181867
                     /locus_tag="wFol_01560"
                     /product="Transcription elongation factor GreA"
                     /note="Uniprot:Q5GSX2"
                     /gene="greA"
                     /fasta_file="/home/lisa/Wolbachia_genomes/Genome_seqs/9_wol_genomes.faa:fasta/wFol03010.fasta.out"
                     /blastp_file="uniprot_all.fasta:blastp/wFol03010.out"
     gene            181871..182515
                     /locus_tag="wFol_01570"
     CDS             181871..182515
                     /locus_tag="wFol_01570"
                     /product="3,4-dihydroxy-2-butanone 4-phosphate synthase"
                     /note="Uniprot:M9WS97"
                     /gene="ribB"
                     /fasta_file="/home/lisa/Wolbachia_genomes/Genome_seqs/9_wol_genomes.faa:fasta/wFol03000.fasta.out"
                     /blastp_file="uniprot_all.fasta:blastp/wFol03000.out"
     gene            182590..183897
                     /locus_tag="wFol_01580"
     CDS             182590..183897
                     /locus_tag="wFol_01580"
                     /product="Peptidase, M48 family"
                     /note="Uniprot:M9WUI0"
                     /fasta_file="/home/lisa/Wolbachia_genomes/Genome_seqs/9_wol_genomes.faa:fasta/wFol02990.fasta.out"
                     /blastp_file="uniprot_all.fasta:blastp/wFol02990.out"
     gene            complement(184045..185169)
                     /locus_tag="wFol_01590"
     CDS             complement(184045..185169)
                     /locus_tag="wFol_01590"
                     /product="Transposase, IS4 family"
                     /note="group IS4Sa"
                     /note="Uniprot:A0A0P6NQA5"
                     /fasta_file="/home/lisa/Wolbachia_genomes/Genome_seqs/9_wol_genomes.faa:fasta/wFol02980.fasta.out"
                     /blastp_file="uniprot_all.fasta:blastp/wFol02980.out"
     gene            complement(185320..186393)
                     /locus_tag="wFol_01600"
     CDS             complement(185320..186393)
                     /locus_tag="wFol_01600"
                     /product="UDP-N-acetylglucosamine--N-acetylmuramyl-(Pentapeptide)
                     pyrophosphoryl-undecaprenol N-acetylglucosamine
                     transferase"
                     /note="Uniprot:A0A178GU82"
                     /gene="murG"
                     /fasta_file="/home/lisa/Wolbachia_genomes/Genome_seqs/9_wol_genomes.faa:fasta/wFol02970.fasta.out"
                     /blastp_file="uniprot_all.fasta:blastp/wFol02970.out"
     gene            186485..186967
                     /locus_tag="wFol_01610"
     CDS             186485..186967
                     /locus_tag="wFol_01610"
                     /product="Unique protein"
                     /fasta_file="/home/lisa/Wolbachia_genomes/Genome_seqs/9_wol_genomes.faa:fasta/wFol02960.fasta.out"
                     /blastp_file="uniprot_all.fasta:blastp/wFol02960.out"
     gene            complement(186964..188349)
                     /locus_tag="wFol_01620"
     CDS             complement(186964..188349)
                     /locus_tag="wFol_01620"
                     /product="Dihydrolipoyl dehydrogenase"
                     /note="Uniprot:B3CM85"
                     /gene="lpdA"
                     /fasta_file="/home/lisa/Wolbachia_genomes/Genome_seqs/9_wol_genomes.faa:fasta/wFol02950.fasta.out"
                     /blastp_file="uniprot_all.fasta:blastp/wFol02950.out"
     gene            complement(188597..189712)
                     /locus_tag="wFol_01630"
     CDS             complement(188597..189712)
                     /locus_tag="wFol_01630"
                     /product="Uncharacterized protein"
                     /note="Uniprot:C0FAG9"
                     /fasta_file="/home/lisa/Wolbachia_genomes/Genome_seqs/9_wol_genomes.faa:fasta/wFol02940.fasta.out"
                     /blastp_file="uniprot_all.fasta:blastp/wFol02940.out"
     gene            complement(190093..190950)
                     /locus_tag="wFol_01640"
     CDS             complement(190093..190950)
                     /locus_tag="wFol_01640"
                     /product="Transposase, PD-(D/E)XK nuclease family"
                     /note="Uniprot:B3CPR6"
                     /fasta_file="/home/lisa/Wolbachia_genomes/Genome_seqs/9_wol_genomes.faa:fasta/wFol02930.fasta.out"
                     /blastp_file="uniprot_all.fasta:blastp/wFol02930.out"
     gene            191113..191892
                     /locus_tag="wFol_01650"
     CDS             191113..191892
                     /locus_tag="wFol_01650"
                     /product="Ankyrin repeat domain protein"
                     /note="Uniprot:M9WVA4"
                     /fasta_file="/home/lisa/Wolbachia_genomes/Genome_seqs/9_wol_genomes.faa:fasta/wFol02920.fasta.out"
                     /blastp_file="uniprot_all.fasta:blastp/wFol02920.out"
     gene            191955..192839
                     /locus_tag="wFol_01660"
     CDS             191955..192839
                     /locus_tag="wFol_01660"
                     /product="GTPase Era"
                     /note="Uniprot:A0A178GW08"
                     /gene="era"
                     /fasta_file="/home/lisa/Wolbachia_genomes/Genome_seqs/9_wol_genomes.faa:fasta/wFol02910.fasta.out"
                     /blastp_file="uniprot_all.fasta:blastp/wFol02910.out"
     gene            192832..193659
                     /locus_tag="wFol_01670"
     CDS             192832..193659
                     /locus_tag="wFol_01670"
                     /product="3'-5' exonuclease"
                     /note="Uniprot:A0A0P6NW73"
                     /fasta_file="/home/lisa/Wolbachia_genomes/Genome_seqs/9_wol_genomes.faa:fasta/wFol02900.fasta.out"
                     /blastp_file="uniprot_all.fasta:blastp/wFol02900.out"
     gene            complement(193704..195032)
                     /locus_tag="wFol_01680"
     CDS             complement(193704..195032)
                     /locus_tag="wFol_01680"
                     /product="Putative triglyceride lipase"
                     /note="Uniprot:M9WNV0"
                     /fasta_file="/home/lisa/Wolbachia_genomes/Genome_seqs/9_wol_genomes.faa:fasta/wFol02890.fasta.out"
                     /blastp_file="uniprot_all.fasta:blastp/wFol02890.out"
     gene            195477..198047
                     /locus_tag="wFol_01690"
     CDS             195477..198047
                     /locus_tag="wFol_01690"
                     /product="Putative outer membrane protein"
                     /note="Uniprot:A0A060PZ37"
                     /fasta_file="/home/lisa/Wolbachia_genomes/Genome_seqs/9_wol_genomes.faa:fasta/wFol02880.fasta.out"
                     /blastp_file="uniprot_all.fasta:blastp/wFol02880.out"
     gene            complement(198347..198877)
                     /locus_tag="wFol_01700"
     CDS             complement(198347..198877)
                     /locus_tag="wFol_01700"
                     /product="Transposase, IS110 family"
                     /note="no group"
                     /note="Uniprot:A0A098ARW6"
                     /fasta_file="/home/lisa/Wolbachia_genomes/Genome_seqs/9_wol_genomes.faa:fasta/wFol02870.fasta.out"
                     /blastp_file="uniprot_all.fasta:blastp/wFol02870.out"
     gene            complement(198874..199332)
                     /locus_tag="wFol_01710"
     CDS             complement(198874..199332)
                     /locus_tag="wFol_01710"
                     /product="Transposase, IS110 family"
                     /note="no group"
                     /note="Uniprot:C0F949"
                     /fasta_file="/home/lisa/Wolbachia_genomes/Genome_seqs/9_wol_genomes.faa:fasta/wFol02860.fasta.out"
                     /blastp_file="uniprot_all.fasta:blastp/wFol02860.out"
     gene            complement(199810..200373)
                     /locus_tag="wFol_01720"
     CDS             complement(199810..200373)
                     /locus_tag="wFol_01720"
                     /product="Ribosomal RNA large subunit methyltransferase E"
                     /note="Uniprot:A0A059IVU4"
                     /gene="rlmE"
                     /fasta_file="/home/lisa/Wolbachia_genomes/Genome_seqs/9_wol_genomes.faa:fasta/wFol02840.fasta.out"
                     /blastp_file="uniprot_all.fasta:blastp/wFol02840.out"
     gene            complement(200465..201040)
                     /locus_tag="wFol_01730"
     CDS             complement(200465..201040)
                     /locus_tag="wFol_01730"
                     /product="Uncharacterized protein"
                     /note="Uniprot:A0A0P6P3K3"
                     /fasta_file="/home/lisa/Wolbachia_genomes/Genome_seqs/9_wol_genomes.faa:fasta/wFol02830.fasta.out"
                     /blastp_file="uniprot_all.fasta:blastp/wFol02830.out"
     gene            complement(201060..202301)
                     /locus_tag="wFol_01740"
     CDS             complement(201060..202301)
                     /locus_tag="wFol_01740"
                     /product="Putative outer membrane protein TolC"
                     /note="Uniprot:A0A178GTJ3"
                     /fasta_file="/home/lisa/Wolbachia_genomes/Genome_seqs/9_wol_genomes.faa:fasta/wFol02820.fasta.out"
                     /blastp_file="uniprot_all.fasta:blastp/wFol02820.out"
     gene            202434..202892
                     /locus_tag="wFol_01750"
     CDS             202434..202892
                     /locus_tag="wFol_01750"
                     /product="50S ribosomal protein L13"
                     /note="Uniprot:M9WQW6"
                     /gene="rplM"
                     /fasta_file="/home/lisa/Wolbachia_genomes/Genome_seqs/9_wol_genomes.faa:fasta/wFol02810.fasta.out"
                     /blastp_file="uniprot_all.fasta:blastp/wFol02810.out"
     gene            202903..203349
                     /locus_tag="wFol_01760"
     CDS             202903..203349
                     /locus_tag="wFol_01760"
                     /product="30S ribosomal protein S9"
                     /note="Uniprot:Q73IT3"
                     /gene="rpsI"
                     /fasta_file="/home/lisa/Wolbachia_genomes/Genome_seqs/9_wol_genomes.faa:fasta/wFol02800.fasta.out"
                     /blastp_file="uniprot_all.fasta:blastp/wFol02800.out"
     gene            203485..203796
                     /locus_tag="wFol_01770"
     CDS             203485..203796
                     /locus_tag="wFol_01770"
                     /product="DNA-binding protein HU family"
                     /note="Uniprot:L7S0M5"
                     /gene="hupB"
                     /fasta_file="/home/lisa/Wolbachia_genomes/Genome_seqs/9_wol_genomes.faa:fasta/wFol02790.fasta.out"
                     /blastp_file="uniprot_all.fasta:blastp/wFol02790.out"
     gene            complement(203789..204496)
                     /locus_tag="wFol_01780"
     CDS             complement(203789..204496)
                     /locus_tag="wFol_01780"
                     /product="Pyridoxine 5'-phosphate synthase"
                     /note="Uniprot:Q4ED87"
                     /gene="pdxJ"
                     /fasta_file="/home/lisa/Wolbachia_genomes/Genome_seqs/9_wol_genomes.faa:fasta/wFol02780.fasta.out"
                     /blastp_file="uniprot_all.fasta:blastp/wFol02780.out"
     gene            complement(204519..205361)
                     /locus_tag="wFol_01790"
     CDS             complement(204519..205361)
                     /locus_tag="wFol_01790"
                     /product="Putative cell division protein FtsQ"
                     /note="Uniprot:A0A178GX00"
                     /fasta_file="/home/lisa/Wolbachia_genomes/Genome_seqs/9_wol_genomes.faa:fasta/wFol02770.fasta.out"
                     /blastp_file="uniprot_all.fasta:blastp/wFol02770.out"
     gene            complement(205342..206445)
                     /locus_tag="wFol_01800"
     CDS             complement(205342..206445)
                     /locus_tag="wFol_01800"
                     /product="D-alanine--D-alanine ligase"
                     /note="Uniprot:A0A178GYW1"
                     /note="Uniprot:H0U3F1"
                     /gene="ddl"
                     /fasta_file="/home/lisa/Wolbachia_genomes/Genome_seqs/9_wol_genomes.faa:fasta/wFol02750.fasta.out"
                     /fasta_file="/home/lisa/Wolbachia_genomes/Genome_seqs/9_wol_genomes.faa:fasta/wFol02760.fasta.out"
                     /blastp_file="uniprot_all.fasta:blastp/wFol02750.out"
                     /blastp_file="uniprot_all.fasta:blastp/wFol02760.out"
     gene            206547..207164
                     /locus_tag="wFol_01810"
     CDS             206547..207164
                     /locus_tag="wFol_01810"
                     /product="Oxidoreductase"
                     /note="Uniprot:A0A060Q3S1"
                     /fasta_file="/home/lisa/Wolbachia_genomes/Genome_seqs/9_wol_genomes.faa:fasta/wFol02740.fasta.out"
                     /blastp_file="uniprot_all.fasta:blastp/wFol02740.out"
     gene            207148..207684
                     /locus_tag="wFol_01820"
     CDS             207148..207684
                     /locus_tag="wFol_01820"
                     /product="5-formyltetrahydrofolate cyclo-ligase"
                     /note="Uniprot:M9WVR7"
                     /fasta_file="/home/lisa/Wolbachia_genomes/Genome_seqs/9_wol_genomes.faa:fasta/wFol02730.fasta.out"
                     /blastp_file="uniprot_all.fasta:blastp/wFol02730.out"
     gene            complement(208034..208942)
                     /locus_tag="wFol_01830"
     CDS             complement(208034..208942)
                     /locus_tag="wFol_01830"
                     /product="Transposase, IS4 family"
                     /note="group IS50"
                     /note="Uniprot:A0A178GTG4"
                     /fasta_file="/home/lisa/Wolbachia_genomes/Genome_seqs/9_wol_genomes.faa:fasta/wFol02710.fasta.out"
                     /blastp_file="uniprot_all.fasta:blastp/wFol02710.out"
     gene            208998..209969
                     /locus_tag="wFol_01840"
     CDS             208998..209969
                     /locus_tag="wFol_01840"
                     /product="Transposase, IS481 family"
                     /note="no group"
                     /note="Uniprot:A0A0D7PAZ1"
                     /fasta_file="/home/lisa/Wolbachia_genomes/Genome_seqs/9_wol_genomes.faa:fasta/wFol02700.fasta.out"
                     /blastp_file="uniprot_all.fasta:blastp/wFol02700.out"
     gene            210205..211164
                     /locus_tag="wFol_01850"
     CDS             210205..211164
                     /locus_tag="wFol_01850"
                     /product="Transposase, IS110 family"
                     /note="no group"
                     /note="Uniprot:C0F949"
                     /fasta_file="/home/lisa/Wolbachia_genomes/Genome_seqs/9_wol_genomes.faa:fasta/wFol02690.fasta.out"
                     /blastp_file="uniprot_all.fasta:blastp/wFol02690.out"
     gene            complement(211531..211839)
                     /locus_tag="wFol_01860"
                     /note="Transposase, IS5 family, truncation"
                     /note="Uniprot:A0A098AQX3"
                     /fasta_file="/home/lisa/Wolbachia_genomes/Genome_seqs/9_wol_genomes.faa:fasta/wFol02680.fasta.out"
                     /blastp_file="uniprot_all.fasta:blastp/wFol02680.out"
                     /pseudo
     gene            211896..213353
                     /locus_tag="wFol_01870"
     CDS             211896..213353
                     /locus_tag="wFol_01870"
                     /product="Transposase, IS4 family"
                     /note="group IS50"
                     /note="Uniprot:A0A178GTG4"
                     /fasta_file="/home/lisa/Wolbachia_genomes/Genome_seqs/9_wol_genomes.faa:fasta/wFol02670.fasta.out"
                     /blastp_file="uniprot_all.fasta:blastp/wFol02670.out"
     gene            complement(213344..213865)
                     /locus_tag="wFol_01880"
                     /note="Transposase, IS5 family, disrupted by IS-insertion"
                     /note="Uniprot:A0A098AQT6"
                     /fasta_file="/home/lisa/Wolbachia_genomes/Genome_seqs/9_wol_genomes.faa:fasta/wFol02660.fasta.out"
                     /blastp_file="uniprot_all.fasta:blastp/wFol02660.out"
                     /pseudo
     gene            complement(214179..215450)
                     /locus_tag="wFol_01890"
     CDS             complement(214179..215450)
                     /locus_tag="wFol_01890"
                     /product="Metallophosphoesterase"
                     /note="Uniprot:A0A060PX36"
                     /fasta_file="/home/lisa/Wolbachia_genomes/Genome_seqs/9_wol_genomes.faa:fasta/wFol02650.fasta.out"
                     /blastp_file="uniprot_all.fasta:blastp/wFol02650.out"
     tRNA            215647..215734
                     /ID="tRNA:Leu-5"
                     /Codon="GAG"
                     /score=60.99
                     /Name="tRNA:Leu-5"
                     /AminoAcid="Leu-5"
     gene            215765..216850
                     /locus_tag="wFol_01900"
     CDS             215765..216850
                     /locus_tag="wFol_01900"
                     /product="GTP cyclohydrolase II"
                     /note="Uniprot:H0U141"
                     /gene="ribA"
                     /fasta_file="/home/lisa/Wolbachia_genomes/Genome_seqs/9_wol_genomes.faa:fasta/wFol02640.fasta.out"
                     /blastp_file="uniprot_all.fasta:blastp/wFol02640.out"
     gene            216914..217597
                     /locus_tag="wFol_01910"
     CDS             216914..217597
                     /locus_tag="wFol_01910"
                     /product="Type IV secretion system protein VirB8"
                     /note="Uniprot:M9WT61"
                     /gene="virB8"
                     /fasta_file="/home/lisa/Wolbachia_genomes/Genome_seqs/9_wol_genomes.faa:fasta/wFol02630.fasta.out"
                     /blastp_file="uniprot_all.fasta:blastp/wFol02630.out"
     gene            217584..218393
                     /locus_tag="wFol_01920"
     CDS             217584..218393
                     /locus_tag="wFol_01920"
                     /product="Type IV secretion system protein VirB9"
                     /note="Uniprot:Q5GT05"
                     /gene="virB9"
                     /fasta_file="/home/lisa/Wolbachia_genomes/Genome_seqs/9_wol_genomes.faa:fasta/wFol02620.fasta.out"
                     /blastp_file="uniprot_all.fasta:blastp/wFol02620.out"
     gene            218410..219909
                     /locus_tag="wFol_01930"
     CDS             218410..219909
                     /locus_tag="wFol_01930"
                     /product="Type IV secretion system protein VirB10"
                     /note="Uniprot:Q5GT04"
                     /gene="virB10"
                     /fasta_file="/home/lisa/Wolbachia_genomes/Genome_seqs/9_wol_genomes.faa:fasta/wFol02610.fasta.out"
                     /blastp_file="uniprot_all.fasta:blastp/wFol02610.out"
     gene            219911..220903
                     /locus_tag="wFol_01940"
     CDS             219911..220903
                     /locus_tag="wFol_01940"
                     /product="Type IV secretion system protein VirB11"
                     /note="Uniprot:A0A060PX42"
                     /gene="virB11"
                     /fasta_file="/home/lisa/Wolbachia_genomes/Genome_seqs/9_wol_genomes.faa:fasta/wFol02600.fasta.out"
                     /blastp_file="uniprot_all.fasta:blastp/wFol02600.out"
     gene            220932..223148
                     /locus_tag="wFol_01950"
     CDS             220932..223148
                     /locus_tag="wFol_01950"
                     /product="Type IV secretion system protein VirD4"
                     /note="Uniprot:A0A178GU96"
                     /gene="virD4"
                     /fasta_file="/home/lisa/Wolbachia_genomes/Genome_seqs/9_wol_genomes.faa:fasta/wFol02590.fasta.out"
                     /blastp_file="uniprot_all.fasta:blastp/wFol02590.out"
     gene            223249..223959
                     /locus_tag="wFol_01960"
     CDS             223249..223959
                     /locus_tag="wFol_01960"
                     /product="Heme exporter protein CcmC"
                     /note="Uniprot:C0R2U4"
                     /gene="ccmC"
                     /fasta_file="/home/lisa/Wolbachia_genomes/Genome_seqs/9_wol_genomes.faa:fasta/wFol02580.fasta.out"
                     /blastp_file="uniprot_all.fasta:blastp/wFol02580.out"
     gene            224189..225547
                     /locus_tag="wFol_01970"
     CDS             224189..225547
                     /locus_tag="wFol_01970"
                     /product="Ankyrin repeat domain protein"
                     /note="Uniprot:A0A0G4PG28"
                     /fasta_file="/home/lisa/Wolbachia_genomes/Genome_seqs/9_wol_genomes.faa:fasta/wFol02570.fasta.out"
                     /blastp_file="uniprot_all.fasta:blastp/wFol02570.out"
     gene            225797..227014
                     /locus_tag="wFol_01980"
     CDS             225797..227014
                     /locus_tag="wFol_01980"
                     /product="Ankyrin repeat domain protein"
                     /note="Uniprot:H2C531"
                     /fasta_file="/home/lisa/Wolbachia_genomes/Genome_seqs/9_wol_genomes.faa:fasta/wFol02560.fasta.out"
                     /blastp_file="uniprot_all.fasta:blastp/wFol02560.out"
     gene            complement(227004..227888)
                     /locus_tag="wFol_01990"
     CDS             complement(227004..227888)
                     /locus_tag="wFol_01990"
                     /product="Putative cation ABC transporter, periplasmic
                     cation-binding protein"
                     /note="Uniprot:C0R3X1"
                     /fasta_file="/home/lisa/Wolbachia_genomes/Genome_seqs/9_wol_genomes.faa:fasta/wFol02550.fasta.out"
                     /blastp_file="uniprot_all.fasta:blastp/wFol02550.out"
     gene            227880..228620
                     /locus_tag="wFol_02000"
     CDS             227880..228620
                     /locus_tag="wFol_02000"
                     /product="Zinc import ATP-binding protein ZnuC"
                     /note="Uniprot:A0A060PUQ5"
                     /gene="znuC"
                     /fasta_file="/home/lisa/Wolbachia_genomes/Genome_seqs/9_wol_genomes.faa:fasta/wFol02540.fasta.out"
                     /blastp_file="uniprot_all.fasta:blastp/wFol02540.out"
     gene            228617..230038
                     /locus_tag="wFol_02010"
     CDS             228617..230038
                     /locus_tag="wFol_02010"
                     /product="Probable protein kinase UbiB"
                     /note="Uniprot:A0A176Q5M7"
                     /fasta_file="/home/lisa/Wolbachia_genomes/Genome_seqs/9_wol_genomes.faa:fasta/wFol02530.fasta.out"
                     /blastp_file="uniprot_all.fasta:blastp/wFol02530.out"
     gene            complement(230103..231074)
                     /locus_tag="wFol_02020"
     CDS             complement(230103..231074)
                     /locus_tag="wFol_02020"
                     /product="Transposase, IS481 family"
                     /note="no group"
                     /note="Uniprot:A0A0D7PAZ1"
                     /fasta_file="/home/lisa/Wolbachia_genomes/Genome_seqs/9_wol_genomes.faa:fasta/wFol02520.fasta.out"
                     /blastp_file="uniprot_all.fasta:blastp/wFol02520.out"
     gene            231353..231739
                     /locus_tag="wFol_02030"
     CDS             231353..231739
                     /locus_tag="wFol_02030"
                     /product="Unique protein"
                     /fasta_file="/home/lisa/Wolbachia_genomes/Genome_seqs/9_wol_genomes.faa:fasta/wFol02510.fasta.out"
                     /blastp_file="uniprot_all.fasta:blastp/wFol02510.out"
     gene            complement(231960..233546)
                     /locus_tag="wFol_02040"
     CDS             complement(231960..233546)
                     /locus_tag="wFol_02040"
                     /product="Penicillin-binding protein"
                     /note="Uniprot:M9X0I0"
                     /fasta_file="/home/lisa/Wolbachia_genomes/Genome_seqs/9_wol_genomes.faa:fasta/wFol02500.fasta.out"
                     /blastp_file="uniprot_all.fasta:blastp/wFol02500.out"
     gene            complement(233564..234331)
                     /locus_tag="wFol_02050"
     CDS             complement(233564..234331)
                     /locus_tag="wFol_02050"
                     /product="Putative polysaccharide deacetylase"
                     /note="Uniprot:Q73H54"
                     /fasta_file="/home/lisa/Wolbachia_genomes/Genome_seqs/9_wol_genomes.faa:fasta/wFol02490.fasta.out"
                     /blastp_file="uniprot_all.fasta:blastp/wFol02490.out"
     gene            234594..235565
                     /locus_tag="wFol_02060"
     CDS             234594..235565
                     /locus_tag="wFol_02060"
                     /product="Transposase, IS481 family"
                     /note="no group"
                     /note="Uniprot:A0A0D7PAZ1"
                     /fasta_file="/home/lisa/Wolbachia_genomes/Genome_seqs/9_wol_genomes.faa:fasta/wFol02480.fasta.out"
                     /blastp_file="uniprot_all.fasta:blastp/wFol02480.out"
     gene            235650..237038
                     /locus_tag="wFol_02070"
     CDS             235650..237038
                     /locus_tag="wFol_02070"
                     /product="Glycerol-1-phosphate dehydrogenase"
                     /note="Uniprot:A0A060PXD6"
                     /gene="egsA"
                     /fasta_file="/home/lisa/Wolbachia_genomes/Genome_seqs/9_wol_genomes.faa:fasta/wFol02470.fasta.out"
                     /blastp_file="uniprot_all.fasta:blastp/wFol02470.out"
     gene            237341..238291
                     /locus_tag="wFol_02080"
     CDS             237341..238291
                     /locus_tag="wFol_02080"
                     /product="Transposase, IS5 family"
                     /note="group IS903"
                     /note="Uniprot:A0A098AQT6"
                     /fasta_file="/home/lisa/Wolbachia_genomes/Genome_seqs/9_wol_genomes.faa:fasta/wFol02460.fasta.out"
                     /blastp_file="uniprot_all.fasta:blastp/wFol02460.out"
     misc_feature    237341..254916
                     /locus_tag="possible GTA"
     gene            238698..240146
                     /locus_tag="wFol_02090"
     CDS             238698..240146
                     /locus_tag="wFol_02090"
                     /product="Putative membrane protein"
                     /note="Uniprot:A0A178H003"
                     /fasta_file="/home/lisa/Wolbachia_genomes/Genome_seqs/9_wol_genomes.faa:fasta/wFol02450.fasta.out"
                     /blastp_file="uniprot_all.fasta:blastp/wFol02450.out"
     gene            240820..242073
                     /locus_tag="wFol_02100"
     CDS             240820..242073
                     /locus_tag="wFol_02100"
                     /product="Phage major capsid protein, HK97 family"
                     /note="Uniprot:Q73HT5"
                     /fasta_file="/home/lisa/Wolbachia_genomes/Genome_seqs/9_wol_genomes.faa:fasta/wFol02440.fasta.out"
                     /blastp_file="uniprot_all.fasta:blastp/wFol02440.out"
     gene            242214..243494
                     /locus_tag="wFol_02110"
     CDS             242214..243494
                     /locus_tag="wFol_02110"
                     /product="Unique protein"
                     /fasta_file="/home/lisa/Wolbachia_genomes/Genome_seqs/9_wol_genomes.faa:fasta/wFol02430.fasta.out"
                     /blastp_file="uniprot_all.fasta:blastp/wFol02430.out"
     gene            243601..244959
                     /locus_tag="wFol_02120"
     CDS             243601..244959
                     /locus_tag="wFol_02120"
                     /product="DNA recombination protein rmuC-like protein"
                     /note="Uniprot:Q73IB9"
                     /fasta_file="/home/lisa/Wolbachia_genomes/Genome_seqs/9_wol_genomes.faa:fasta/wFol02420.fasta.out"
                     /blastp_file="uniprot_all.fasta:blastp/wFol02420.out"
     gene            245469..247772
                     /locus_tag="wFol_02130"
     CDS             245469..247772
                     /locus_tag="wFol_02130"
                     /product="Uncharacterized protein"
                     /note="Uniprot:A0A178GW52"
                     /fasta_file="/home/lisa/Wolbachia_genomes/Genome_seqs/9_wol_genomes.faa:fasta/wFol02410.fasta.out"
                     /blastp_file="uniprot_all.fasta:blastp/wFol02410.out"
     gene            complement(247841..249370)
                     /locus_tag="wFol_02140"
     CDS             complement(247841..249370)
                     /locus_tag="wFol_02140"
                     /product="Ankyrin repeat domain protein"
                     /note="Uniprot:M9WTT3"
                     /fasta_file="/home/lisa/Wolbachia_genomes/Genome_seqs/9_wol_genomes.faa:fasta/wFol02400.fasta.out"
                     /blastp_file="uniprot_all.fasta:blastp/wFol02400.out"
     gene            complement(249515..250483)
                     /locus_tag="wFol_02150"
     CDS             complement(249515..250483)
                     /locus_tag="wFol_02150"
                     /product="Unique protein"
                     /fasta_file="/home/lisa/Wolbachia_genomes/Genome_seqs/9_wol_genomes.faa:fasta/wFol02390.fasta.out"
                     /blastp_file="uniprot_all.fasta:blastp/wFol02390.out"
     gene            complement(250706..252187)
                     /locus_tag="wFol_02160"
     CDS             complement(250706..252187)
                     /locus_tag="wFol_02160"
                     /product="Unique protein"
                     /fasta_file="/home/lisa/Wolbachia_genomes/Genome_seqs/9_wol_genomes.faa:fasta/wFol02380.fasta.out"
                     /blastp_file="uniprot_all.fasta:blastp/wFol02380.out"
     gene            complement(252408..253334)
                     /locus_tag="wFol_02170"
     CDS             complement(252408..253334)
                     /locus_tag="wFol_02170"
                     /product="Unique protein"
                     /fasta_file="/home/lisa/Wolbachia_genomes/Genome_seqs/9_wol_genomes.faa:fasta/wFol02370.fasta.out"
                     /blastp_file="uniprot_all.fasta:blastp/wFol02370.out"
     gene            253459..254916
                     /locus_tag="wFol_02180"
     CDS             253459..254916
                     /locus_tag="wFol_02180"
                     /product="Transposase, IS4 family"
                     /note="group IS50"
                     /note="Uniprot:A0A178GTG4"
                     /fasta_file="/home/lisa/Wolbachia_genomes/Genome_seqs/9_wol_genomes.faa:fasta/wFol02360.fasta.out"
                     /blastp_file="uniprot_all.fasta:blastp/wFol02360.out"
     tRNA            255314..255385
                     /ID="tRNA:Asn"
                     /Codon="GTT"
                     /score=75.84
                     /Name="tRNA:Asn"
                     /AminoAcid="Asn"
     gene            255418..256953
                     /locus_tag="wFol_02190"
     CDS             255418..256953
                     /locus_tag="wFol_02190"
                     /product="2,3-bisphosphoglycerate-independent
                     phosphoglycerate mutase"
                     /note="Uniprot:M9WSA4"
                     /gene="pgm"
                     /fasta_file="/home/lisa/Wolbachia_genomes/Genome_seqs/9_wol_genomes.faa:fasta/wFol02340.fasta.out"
                     /blastp_file="uniprot_all.fasta:blastp/wFol02340.out"
     gene            complement(256950..257924)
                     /locus_tag="wFol_02200"
     CDS             complement(256950..257924)
                     /locus_tag="wFol_02200"
                     /product="Malonyl CoA-acyl carrier protein transacylase"
                     /note="Uniprot:A0A059IWX1"
                     /gene="fabD"
                     /fasta_file="/home/lisa/Wolbachia_genomes/Genome_seqs/9_wol_genomes.faa:fasta/wFol02330.fasta.out"
                     /blastp_file="uniprot_all.fasta:blastp/wFol02330.out"
     gene            258049..258261
                     /locus_tag="wFol_02210"
     CDS             258049..258261
                     /locus_tag="wFol_02210"
                     /product="50S ribosomal protein L31"
                     /note="Uniprot:Q5GSN5"
                     /gene="rpmE"
                     /fasta_file="/home/lisa/Wolbachia_genomes/Genome_seqs/9_wol_genomes.faa:fasta/wFol02320.fasta.out"
                     /blastp_file="uniprot_all.fasta:blastp/wFol02320.out"
     gene            258296..259087
                     /locus_tag="wFol_02220"
     CDS             258296..259087
                     /locus_tag="wFol_02220"
                     /product="NAD kinase"
                     /note="Uniprot:C0R3T2"
                     /gene="nadK"
                     /fasta_file="/home/lisa/Wolbachia_genomes/Genome_seqs/9_wol_genomes.faa:fasta/wFol02310.fasta.out"
                     /blastp_file="uniprot_all.fasta:blastp/wFol02310.out"
     gene            259195..260655
                     /locus_tag="wFol_02230"
     CDS             259195..260655
                     /locus_tag="wFol_02230"
                     /product="Putative membrane protein"
                     /note="Uniprot:A0A178GUE8"
                     /fasta_file="/home/lisa/Wolbachia_genomes/Genome_seqs/9_wol_genomes.faa:fasta/wFol02300.fasta.out"
                     /blastp_file="uniprot_all.fasta:blastp/wFol02300.out"
     gene            260870..261841
                     /locus_tag="wFol_02240"
     CDS             260870..261841
                     /locus_tag="wFol_02240"
                     /product="Transposase, IS481 family"
                     /note="no group"
                     /note="Uniprot:A0A0D7PAZ1"
                     /fasta_file="/home/lisa/Wolbachia_genomes/Genome_seqs/9_wol_genomes.faa:fasta/wFol02290.fasta.out"
                     /blastp_file="uniprot_all.fasta:blastp/wFol02290.out"
     gene            261958..262917
                     /locus_tag="wFol_02250"
     CDS             261958..262917
                     /locus_tag="wFol_02250"
                     /product="Transposase, IS5 family"
                     /note="group IS903"
                     /note="Uniprot:A0A098AQT6"
                     /fasta_file="/home/lisa/Wolbachia_genomes/Genome_seqs/9_wol_genomes.faa:fasta/wFol02280.fasta.out"
                     /blastp_file="uniprot_all.fasta:blastp/wFol02280.out"
     gene            complement(263122..264246)
                     /locus_tag="wFol_02260"
     CDS             complement(263122..264246)
                     /locus_tag="wFol_02260"
                     /product="Transposase, IS4 family"
                     /note="group IS4Sa"
                     /note="Uniprot:A0A0P6NQA5"
                     /fasta_file="/home/lisa/Wolbachia_genomes/Genome_seqs/9_wol_genomes.faa:fasta/wFol02270.fasta.out"
                     /blastp_file="uniprot_all.fasta:blastp/wFol02270.out"
     gene            264436..265467
                     /locus_tag="wFol_02270"
     CDS             264436..265467
                     /locus_tag="wFol_02270"
                     /product="Iron compound ABC transporter, periplasmic iron
                     compound-binding protein"
                     /note="Uniprot:Q73GN9"
                     /fasta_file="/home/lisa/Wolbachia_genomes/Genome_seqs/9_wol_genomes.faa:fasta/wFol02260.fasta.out"
                     /blastp_file="uniprot_all.fasta:blastp/wFol02260.out"
     gene            265698..266375
                     /locus_tag="wFol_02280"
     CDS             265698..266375
                     /locus_tag="wFol_02280"
                     /product="RadC family protein"
                     /note="Uniprot:Q4EBD7"
                     /gene="radC"
                     /fasta_file="/home/lisa/Wolbachia_genomes/Genome_seqs/9_wol_genomes.faa:fasta/wFol02250.fasta.out"
                     /blastp_file="uniprot_all.fasta:blastp/wFol02250.out"
     tRNA            266426..266498
                     /ID="tRNA:Val-2"
                     /Codon="GAC"
                     /score=77.03
                     /Name="tRNA:Val-2"
                     /AminoAcid="Val-2"
     gene            266525..267421
                     /locus_tag="wFol_02290"
     CDS             266525..267421
                     /locus_tag="wFol_02290"
                     /product="Cation efflux family protein"
                     /note="Uniprot:A0A0P6P3J2"
                     /fasta_file="/home/lisa/Wolbachia_genomes/Genome_seqs/9_wol_genomes.faa:fasta/wFol02240.fasta.out"
                     /blastp_file="uniprot_all.fasta:blastp/wFol02240.out"
     gene            267477..269345
                     /locus_tag="wFol_02300"
     CDS             267477..269345
                     /locus_tag="wFol_02300"
                     /product="Putative membrane protein"
                     /note="Uniprot:A0A178GT08"
                     /fasta_file="/home/lisa/Wolbachia_genomes/Genome_seqs/9_wol_genomes.faa:fasta/wFol02230.fasta.out"
                     /blastp_file="uniprot_all.fasta:blastp/wFol02230.out"
     gene            complement(269336..269911)
                     /locus_tag="wFol_02310"
     CDS             complement(269336..269911)
                     /locus_tag="wFol_02310"
                     /product="Glycerol-3-phosphate acyltransferase"
                     /note="Uniprot:A0A0P6NN82"
                     /gene="plsY"
                     /fasta_file="/home/lisa/Wolbachia_genomes/Genome_seqs/9_wol_genomes.faa:fasta/wFol02220.fasta.out"
                     /blastp_file="uniprot_all.fasta:blastp/wFol02220.out"
     gene            complement(269911..270618)
                     /locus_tag="wFol_02320"
     CDS             complement(269911..270618)
                     /locus_tag="wFol_02320"
                     /product="Uncharacterized protein"
                     /note="Uniprot:A0A178GTQ8"
                     /fasta_file="/home/lisa/Wolbachia_genomes/Genome_seqs/9_wol_genomes.faa:fasta/wFol02210.fasta.out"
                     /blastp_file="uniprot_all.fasta:blastp/wFol02210.out"
     gene            complement(270629..272092)
                     /locus_tag="wFol_02330"
     CDS             complement(270629..272092)
                     /locus_tag="wFol_02330"
                     /product="Sodium/alanine symporter family protein"
                     /note="Uniprot:C0R4D7"
                     /fasta_file="/home/lisa/Wolbachia_genomes/Genome_seqs/9_wol_genomes.faa:fasta/wFol02200.fasta.out"
                     /blastp_file="uniprot_all.fasta:blastp/wFol02200.out"
     gene            complement(272098..273441)
                     /locus_tag="wFol_02340"
     CDS             complement(272098..273441)
                     /locus_tag="wFol_02340"
                     /product="Sodium/alanine symporter family protein"
                     /note="Uniprot:C0R4D8"
                     /fasta_file="/home/lisa/Wolbachia_genomes/Genome_seqs/9_wol_genomes.faa:fasta/wFol02190.fasta.out"
                     /blastp_file="uniprot_all.fasta:blastp/wFol02190.out"
     gene            273741..275156
                     /locus_tag="wFol_02350"
     CDS             273741..275156
                     /locus_tag="wFol_02350"
                     /product="Transcription termination factor Rho"
                     /note="Uniprot:A0A060Q4K4"
                     /gene="rho"
                     /fasta_file="/home/lisa/Wolbachia_genomes/Genome_seqs/9_wol_genomes.faa:fasta/wFol02180.fasta.out"
                     /blastp_file="uniprot_all.fasta:blastp/wFol02180.out"
     gene            complement(275353..276312)
                     /locus_tag="wFol_02360"
     CDS             complement(275353..276312)
                     /locus_tag="wFol_02360"
                     /product="Transposase, IS5 family"
                     /note="group IS903"
                     /note="Uniprot:A0A098AQT6"
                     /fasta_file="/home/lisa/Wolbachia_genomes/Genome_seqs/9_wol_genomes.faa:fasta/wFol02170.fasta.out"
                     /blastp_file="uniprot_all.fasta:blastp/wFol02170.out"
     gene            complement(276674..278041)
                     /locus_tag="wFol_02370"
     CDS             complement(276674..278041)
                     /locus_tag="wFol_02370"
                     /product="Magnesium transporter MgtE"
                     /note="Uniprot:A0A098AS13"
                     /gene="mgtE"
                     /fasta_file="/home/lisa/Wolbachia_genomes/Genome_seqs/9_wol_genomes.faa:fasta/wFol02160.fasta.out"
                     /blastp_file="uniprot_all.fasta:blastp/wFol02160.out"
     gene            278254..279294
                     /locus_tag="wFol_02380"
     CDS             278254..279294
                     /locus_tag="wFol_02380"
                     /product="Peptide chain release factor 2"
                     /note="Uniprot:M9X048"
                     /gene="prfB"
                     /fasta_file="/home/lisa/Wolbachia_genomes/Genome_seqs/9_wol_genomes.faa:fasta/wFol02150.fasta.out"
                     /blastp_file="uniprot_all.fasta:blastp/wFol02150.out"
     gene            complement(279465..280487)
                     /locus_tag="wFol_02390"
     CDS             complement(279465..280487)
                     /locus_tag="wFol_02390"
                     /product="Iron-sulfur cluster carrier protein"
                     /note="Uniprot:A0A178GU27"
                     /fasta_file="/home/lisa/Wolbachia_genomes/Genome_seqs/9_wol_genomes.faa:fasta/wFol02140.fasta.out"
                     /blastp_file="uniprot_all.fasta:blastp/wFol02140.out"
     gene            280739..281677
                     /locus_tag="wFol_02400"
     CDS             280739..281677
                     /locus_tag="wFol_02400"
                     /product="Ribose-phosphate pyrophosphokinase"
                     /note="Uniprot:Q73IV8"
                     /gene="prsA"
                     /fasta_file="/home/lisa/Wolbachia_genomes/Genome_seqs/9_wol_genomes.faa:fasta/wFol02130.fasta.out"
                     /blastp_file="uniprot_all.fasta:blastp/wFol02130.out"
     gene            281667..282020
                     /locus_tag="wFol_02410"
     CDS             281667..282020
                     /locus_tag="wFol_02410"
                     /product="Glutamyl-tRNA(Gln) amidotransferase, C subunit,
                     putative"
                     /note="Uniprot:C0R559"
                     /fasta_file="/home/lisa/Wolbachia_genomes/Genome_seqs/9_wol_genomes.faa:fasta/wFol02120.fasta.out"
                     /blastp_file="uniprot_all.fasta:blastp/wFol02120.out"
     gene            282216..282998
                     /locus_tag="wFol_02420"
     CDS             282216..282998
                     /locus_tag="wFol_02420"
                     /product="ABC transporter permease"
                     /note="Uniprot:C0R410"
                     /fasta_file="/home/lisa/Wolbachia_genomes/Genome_seqs/9_wol_genomes.faa:fasta/wFol02110.fasta.out"
                     /blastp_file="uniprot_all.fasta:blastp/wFol02110.out"
     gene            282991..283719
                     /locus_tag="wFol_02430"
     CDS             282991..283719
                     /locus_tag="wFol_02430"
                     /product="ABC transporter, ATP-binding protein"
                     /note="Uniprot:C0R411"
                     /fasta_file="/home/lisa/Wolbachia_genomes/Genome_seqs/9_wol_genomes.faa:fasta/wFol02100.fasta.out"
                     /blastp_file="uniprot_all.fasta:blastp/wFol02100.out"
     gene            complement(283737..284321)
                     /locus_tag="wFol_02440"
     CDS             complement(283737..284321)
                     /locus_tag="wFol_02440"
                     /product="Ubiquinol-cytochrome c reductase iron-sulfur
                     subunit"
                     /note="Uniprot:A0A098ATN4"
                     /gene="petA"
                     /fasta_file="/home/lisa/Wolbachia_genomes/Genome_seqs/9_wol_genomes.faa:fasta/wFol02090.fasta.out"
                     /blastp_file="uniprot_all.fasta:blastp/wFol02090.out"
     gene            284521..287223
                     /locus_tag="wFol_02450"
     CDS             284521..287223
                     /locus_tag="wFol_02450"
                     /product="DNA gyrase subunit A"
                     /note="Uniprot:C0R4M7"
                     /gene="gyrA"
                     /fasta_file="/home/lisa/Wolbachia_genomes/Genome_seqs/9_wol_genomes.faa:fasta/wFol02080.fasta.out"
                     /blastp_file="uniprot_all.fasta:blastp/wFol02080.out"
     gene            complement(287240..287707)
                     /locus_tag="wFol_02460"
     CDS             complement(287240..287707)
                     /locus_tag="wFol_02460"
                     /product="Putative pre-16S rRNA nuclease"
                     /note="Uniprot:M9WZ34"
                     /fasta_file="/home/lisa/Wolbachia_genomes/Genome_seqs/9_wol_genomes.faa:fasta/wFol02070.fasta.out"
                     /blastp_file="uniprot_all.fasta:blastp/wFol02070.out"
     gene            288422..289042
                     /locus_tag="wFol_02470"
     CDS             288422..289042
                     /locus_tag="wFol_02470"
                     /product="Surface antigen-related protein"
                     /fasta_file="/home/lisa/Wolbachia_genomes/Genome_seqs/9_wol_genomes.faa:fasta/wFol02060.fasta.out"
                     /blastp_file="uniprot_all.fasta:blastp/wFol02060.out"
     gene            289066..289803
                     /locus_tag="wFol_02480"
     CDS             289066..289803
                     /locus_tag="wFol_02480"
                     /product="Putative outer membrane protein"
                     /fasta_file="/home/lisa/Wolbachia_genomes/Genome_seqs/9_wol_genomes.faa:fasta/wFol02050.fasta.out"
                     /blastp_file="uniprot_all.fasta:blastp/wFol02050.out"
     gene            complement(290300..292084)
                     /locus_tag="wFol_02490"
     CDS             complement(290300..292084)
                     /locus_tag="wFol_02490"
                     /product="Ribonucleoside-diphosphate reductase"
                     /note="Uniprot:Q73IG9"
                     /gene="nrdA"
                     /fasta_file="/home/lisa/Wolbachia_genomes/Genome_seqs/9_wol_genomes.faa:fasta/wFol02040.fasta.out"
                     /blastp_file="uniprot_all.fasta:blastp/wFol02040.out"
     gene            complement(292146..293222)
                     /locus_tag="wFol_02500"
     CDS             complement(292146..293222)
                     /locus_tag="wFol_02500"
                     /product="Putative TPR repeat-containing
                     methyltransferase"
                     /note="Uniprot:A0A098AQQ6"
                     /fasta_file="/home/lisa/Wolbachia_genomes/Genome_seqs/9_wol_genomes.faa:fasta/wFol02030.fasta.out"
                     /blastp_file="uniprot_all.fasta:blastp/wFol02030.out"
     rRNA            293571..296336
                     /score=3061.4
                     /molecule="23s_rRNA"
     rRNA            296408..296513
                     /score=103.4
                     /molecule="5s_rRNA"
     gene            296648..297094
                     /locus_tag="wFol_02510"
     CDS             296648..297094
                     /locus_tag="wFol_02510"
                     /product="Endoribonuclease YbeY"
                     /note="Uniprot:A0A060Q3G2"
                     /gene="ybeY"
                     /fasta_file="/home/lisa/Wolbachia_genomes/Genome_seqs/9_wol_genomes.faa:fasta/wFol02020.fasta.out"
                     /blastp_file="uniprot_all.fasta:blastp/wFol02020.out"
     gene            297160..297669
                     /locus_tag="wFol_02520"
     CDS             297160..297669
                     /locus_tag="wFol_02520"
                     /product="Ribosome maturation factor RimM"
                     /note="Uniprot:A0A098ATS6"
                     /gene="rimM"
                     /fasta_file="/home/lisa/Wolbachia_genomes/Genome_seqs/9_wol_genomes.faa:fasta/wFol02010.fasta.out"
                     /blastp_file="uniprot_all.fasta:blastp/wFol02010.out"
     gene            complement(297719..298369)
                     /locus_tag="wFol_02530"
     CDS             complement(297719..298369)
                     /locus_tag="wFol_02530"
                     /product="Heme exporter protein CcmB"
                     /note="Uniprot:A0A178GTU2"
                     /gene="ccmB"
                     /fasta_file="/home/lisa/Wolbachia_genomes/Genome_seqs/9_wol_genomes.faa:fasta/wFol02000.fasta.out"
                     /blastp_file="uniprot_all.fasta:blastp/wFol02000.out"
     gene            298473..298865
                     /locus_tag="wFol_02540"
     CDS             298473..298865
                     /locus_tag="wFol_02540"
                     /product="Putative dnaK suppressor protein"
                     /note="Uniprot:Q73G68"
                     /fasta_file="/home/lisa/Wolbachia_genomes/Genome_seqs/9_wol_genomes.faa:fasta/wFol01990.fasta.out"
                     /blastp_file="uniprot_all.fasta:blastp/wFol01990.out"
     gene            complement(298914..299504)
                     /locus_tag="wFol_02550"
     CDS             complement(298914..299504)
                     /locus_tag="wFol_02550"
                     /product="Guanylate kinase"
                     /note="Uniprot:A0A060Q028"
                     /gene="gmk"
                     /fasta_file="/home/lisa/Wolbachia_genomes/Genome_seqs/9_wol_genomes.faa:fasta/wFol01980.fasta.out"
                     /blastp_file="uniprot_all.fasta:blastp/wFol01980.out"
     gene            complement(299501..301435)
                     /locus_tag="wFol_02560"
     CDS             complement(299501..301435)
                     /locus_tag="wFol_02560"
                     /product="Pentapeptide repeat domain protein"
                     /note="Uniprot:M9WRK1"
                     /fasta_file="/home/lisa/Wolbachia_genomes/Genome_seqs/9_wol_genomes.faa:fasta/wFol01970.fasta.out"
                     /blastp_file="uniprot_all.fasta:blastp/wFol01970.out"
     gene            complement(301432..302682)
                     /locus_tag="wFol_02570"
     CDS             complement(301432..302682)
                     /locus_tag="wFol_02570"
                     /product="Ankyrin repeat domain protein"
                     /note="Uniprot:A0A178GVA1"
                     /fasta_file="/home/lisa/Wolbachia_genomes/Genome_seqs/9_wol_genomes.faa:fasta/wFol01960.fasta.out"
                     /blastp_file="uniprot_all.fasta:blastp/wFol01960.out"
     gene            303016..304440
                     /locus_tag="wFol_02580"
     CDS             303016..304440
                     /locus_tag="wFol_02580"
                     /product="Aspartyl/glutamyl-tRNA(Asn/Gln) amidotransferase
                     subunit B"
                     /note="Uniprot:M9WYG1"
                     /gene="gatB"
                     /fasta_file="/home/lisa/Wolbachia_genomes/Genome_seqs/9_wol_genomes.faa:fasta/wFol01950.fasta.out"
                     /blastp_file="uniprot_all.fasta:blastp/wFol01950.out"
     gene            304482..306482
                     /locus_tag="wFol_02590"
     CDS             304482..306482
                     /locus_tag="wFol_02590"
                     /product="NB-ARC domain protein"
                     /note="Uniprot:A0A178GSB7"
                     /note="Uniprot:Q73IL3"
                     /fasta_file="/home/lisa/Wolbachia_genomes/Genome_seqs/9_wol_genomes.faa:fasta/wFol01930.fasta.out"
                     /fasta_file="/home/lisa/Wolbachia_genomes/Genome_seqs/9_wol_genomes.faa:fasta/wFol01940.fasta.out"
                     /blastp_file="uniprot_all.fasta:blastp/wFol01930.out"
                     /blastp_file="uniprot_all.fasta:blastp/wFol01940.out"
     gene            306562..307311
                     /locus_tag="wFol_02600"
     CDS             306562..307311
                     /locus_tag="wFol_02600"
                     /product="Transposase, IS5 family"
                     /note="group IS427"
                     /note="Uniprot:A0A178GTR6"
                     /fasta_file="/home/lisa/Wolbachia_genomes/Genome_seqs/9_wol_genomes.faa:fasta/wFol01920.fasta.out"
                     /blastp_file="uniprot_all.fasta:blastp/wFol01920.out"
     gene            307289..308956
                     /locus_tag="wFol_02610"
     CDS             307289..308956
                     /locus_tag="wFol_02610"
                     /product="Ankyrin repeat domain protein"
                     /note="Uniprot:A0A178GSB7"
                     /fasta_file="/home/lisa/Wolbachia_genomes/Genome_seqs/9_wol_genomes.faa:fasta/wFol01910.fasta.out"
                     /blastp_file="uniprot_all.fasta:blastp/wFol01910.out"
     gene            309064..309366
                     /locus_tag="wFol_02620"
     CDS             309064..309366
                     /locus_tag="wFol_02620"
                     /product="50S ribosomal protein L21"
                     /note="Uniprot:A0A060Q012"
                     /gene="rplU"
                     /fasta_file="/home/lisa/Wolbachia_genomes/Genome_seqs/9_wol_genomes.faa:fasta/wFol01900.fasta.out"
                     /blastp_file="uniprot_all.fasta:blastp/wFol01900.out"
     gene            309377..309649
                     /locus_tag="wFol_02630"
     CDS             309377..309649
                     /locus_tag="wFol_02630"
                     /product="50S ribosomal protein L27"
                     /note="Uniprot:A0A059IWD3"
                     /gene="rpmA"
                     /fasta_file="/home/lisa/Wolbachia_genomes/Genome_seqs/9_wol_genomes.faa:fasta/wFol01890.fasta.out"
                     /blastp_file="uniprot_all.fasta:blastp/wFol01890.out"
     tRNA            309659..309735
                     /ID="tRNA:Ile"
                     /Codon="GAT"
                     /score=79.22
                     /Name="tRNA:Ile"
                     /AminoAcid="Ile"
     gene            complement(310470..310820)
                     /locus_tag="wFol_02640"
     CDS             complement(310470..310820)
                     /locus_tag="wFol_02640"
                     /product="Putative phage repressor protein"
                     /note="Uniprot:M9WT06"
                     /fasta_file="/home/lisa/Wolbachia_genomes/Genome_seqs/9_wol_genomes.faa:fasta/wFol01870.fasta.out"
                     /blastp_file="uniprot_all.fasta:blastp/wFol01870.out"
     misc_feature    310470..338807
                     /locus_tag="possible phage region"
     gene            complement(311254..313137)
                     /locus_tag="wFol_02650"
     CDS             complement(311254..313137)
                     /locus_tag="wFol_02650"
                     /product="Ankyrin repeat domain protein"
                     /fasta_file="/home/lisa/Wolbachia_genomes/Genome_seqs/9_wol_genomes.faa:fasta/wFol01860.fasta.out"
                     /blastp_file="uniprot_all.fasta:blastp/wFol01860.out"
     gene            complement(313130..314194)
                     /locus_tag="wFol_02660"
     CDS             complement(313130..314194)
                     /locus_tag="wFol_02660"
                     /product="Ankyrin repeat domain protein"
                     /note="Uniprot:W4XE96"
                     /fasta_file="/home/lisa/Wolbachia_genomes/Genome_seqs/9_wol_genomes.faa:fasta/wFol01850.fasta.out"
                     /blastp_file="uniprot_all.fasta:blastp/wFol01850.out"
     gene            314535..315740
                     /locus_tag="wFol_02670"
     CDS             314535..315740
                     /locus_tag="wFol_02670"
                     /product="Uncharacterized protein"
                     /note="Uniprot:B9A940"
                     /fasta_file="/home/lisa/Wolbachia_genomes/Genome_seqs/9_wol_genomes.faa:fasta/wFol01840.fasta.out"
                     /blastp_file="uniprot_all.fasta:blastp/wFol01840.out"
     gene            complement(315737..316135)
                     /locus_tag="wFol_02680"
     CDS             complement(315737..316135)
                     /locus_tag="wFol_02680"
                     /product="Putative phage repressor protein"
                     /note="Uniprot:A0A178GUB6"
                     /fasta_file="/home/lisa/Wolbachia_genomes/Genome_seqs/9_wol_genomes.faa:fasta/wFol01830.fasta.out"
                     /blastp_file="uniprot_all.fasta:blastp/wFol01830.out"
     gene            complement(316192..316530)
                     /locus_tag="wFol_02690"
     CDS             complement(316192..316530)
                     /locus_tag="wFol_02690"
                     /product="Putative phage repressor protein"
                     /note="Uniprot:B9A938"
                     /fasta_file="/home/lisa/Wolbachia_genomes/Genome_seqs/9_wol_genomes.faa:fasta/wFol01820.fasta.out"
                     /blastp_file="uniprot_all.fasta:blastp/wFol01820.out"
     gene            complement(316545..317528)
                     /locus_tag="wFol_02700"
     CDS             complement(316545..317528)
                     /locus_tag="wFol_02700"
                     /product="Uncharacterized protein"
                     /note="Uniprot:A0A178GS58"
                     /fasta_file="/home/lisa/Wolbachia_genomes/Genome_seqs/9_wol_genomes.faa:fasta/wFol01810.fasta.out"
                     /blastp_file="uniprot_all.fasta:blastp/wFol01810.out"
     gene            complement(317545..318228)
                     /locus_tag="wFol_02710"
     CDS             complement(317545..318228)
                     /locus_tag="wFol_02710"
                     /product="RadC family protein"
                     /note="Uniprot:M9WYM3"
                     /gene="radC"
                     /fasta_file="/home/lisa/Wolbachia_genomes/Genome_seqs/9_wol_genomes.faa:fasta/wFol01800.fasta.out"
                     /blastp_file="uniprot_all.fasta:blastp/wFol01800.out"
     gene            complement(318399..320082)
                     /locus_tag="wFol_02720"
                     /note="Site-specific recombinase, resolvase family,
                     contains frameshift mutation"
                     /note="Uniprot:A0A059PCU0"
                     /note="Uniprot:B6Y9E1"
                     /fasta_file="/home/lisa/Wolbachia_genomes/Genome_seqs/9_wol_genomes.faa:fasta/wFol01780.fasta.out"
                     /fasta_file="/home/lisa/Wolbachia_genomes/Genome_seqs/9_wol_genomes.faa:fasta/wFol01790.fasta.out"
                     /blastp_file="uniprot_all.fasta:blastp/wFol01780.out"
                     /blastp_file="uniprot_all.fasta:blastp/wFol01790.out"
                     /pseudo
     gene            complement(320083..320502)
                     /locus_tag="wFol_02730"
     CDS             complement(320083..320502)
                     /locus_tag="wFol_02730"
                     /product="Putative phage related protein"
                     /note="Uniprot:A0A061JGP7"
                     /fasta_file="/home/lisa/Wolbachia_genomes/Genome_seqs/9_wol_genomes.faa:fasta/wFol01770.fasta.out"
                     /blastp_file="uniprot_all.fasta:blastp/wFol01770.out"
     gene            complement(320597..320974)
                     /locus_tag="wFol_02740"
     CDS             complement(320597..320974)
                     /locus_tag="wFol_02740"
                     /product="Putative resolvase"
                     /note="Uniprot:B9A8Y9"
                     /fasta_file="/home/lisa/Wolbachia_genomes/Genome_seqs/9_wol_genomes.faa:fasta/wFol01760.fasta.out"
                     /blastp_file="uniprot_all.fasta:blastp/wFol01760.out"
     gene            complement(320990..321595)
                     /locus_tag="wFol_02750"
     CDS             complement(320990..321595)
                     /locus_tag="wFol_02750"
                     /product="Ankyrin repeat domain protein"
                     /note="Uniprot:C0R4T7"
                     /fasta_file="/home/lisa/Wolbachia_genomes/Genome_seqs/9_wol_genomes.faa:fasta/wFol01750.fasta.out"
                     /blastp_file="uniprot_all.fasta:blastp/wFol01750.out"
     gene            complement(321800..322471)
                     /locus_tag="wFol_02760"
     CDS             complement(321800..322471)
                     /locus_tag="wFol_02760"
                     /product="Ankyrin repeat domain protein"
                     /note="Uniprot:Q73I91"
                     /fasta_file="/home/lisa/Wolbachia_genomes/Genome_seqs/9_wol_genomes.faa:fasta/wFol01740.fasta.out"
                     /blastp_file="uniprot_all.fasta:blastp/wFol01740.out"
     gene            322963..326514
                     /locus_tag="wFol_02770"
     CDS             322963..326514
                     /locus_tag="wFol_02770"
                     /product="Helicase, SNF2 family"
                     /note="Uniprot:M9WR97"
                     /fasta_file="/home/lisa/Wolbachia_genomes/Genome_seqs/9_wol_genomes.faa:fasta/wFol01730.fasta.out"
                     /blastp_file="uniprot_all.fasta:blastp/wFol01730.out"
     gene            326599..327486
                     /locus_tag="wFol_02780"
     CDS             326599..327486
                     /locus_tag="wFol_02780"
                     /product="Phage antirepressor protein"
                     /note="Uniprot:B3CP41"
                     /fasta_file="/home/lisa/Wolbachia_genomes/Genome_seqs/9_wol_genomes.faa:fasta/wFol01720.fasta.out"
                     /blastp_file="uniprot_all.fasta:blastp/wFol01720.out"
     gene            327746..329944
                     /locus_tag="wFol_02790"
     CDS             327746..329944
                     /locus_tag="wFol_02790"
                     /product="Putative DNA repair protein"
                     /note="Uniprot:E9P5X3"
                     /fasta_file="/home/lisa/Wolbachia_genomes/Genome_seqs/9_wol_genomes.faa:fasta/wFol01710.fasta.out"
                     /blastp_file="uniprot_all.fasta:blastp/wFol01710.out"
     gene            complement(331620..332666)
                     /locus_tag="wFol_02800"
     CDS             complement(331620..332666)
                     /locus_tag="wFol_02800"
                     /product="Unique protein"
                     /fasta_file="/home/lisa/Wolbachia_genomes/Genome_seqs/9_wol_genomes.faa:fasta/wFol01700.fasta.out"
                     /blastp_file="uniprot_all.fasta:blastp/wFol01700.out"
     gene            complement(333651..334685)
                     /locus_tag="wFol_02810"
     CDS             complement(333651..334685)
                     /locus_tag="wFol_02810"
                     /product="Putative virulence factor RhuM"
                     /note="Uniprot:A0A178GVB4"
                     /fasta_file="/home/lisa/Wolbachia_genomes/Genome_seqs/9_wol_genomes.faa:fasta/wFol01690.fasta.out"
                     /blastp_file="uniprot_all.fasta:blastp/wFol01690.out"
     gene            337440..338174
                     /locus_tag="wFol_02820"
     CDS             337440..338174
                     /locus_tag="wFol_02820"
                     /product="Nucleotide-diphospho-sugar transferases"
                     /note="Uniprot:Q73HF3"
                     /fasta_file="/home/lisa/Wolbachia_genomes/Genome_seqs/9_wol_genomes.faa:fasta/wFol01670.fasta.out"
                     /blastp_file="uniprot_all.fasta:blastp/wFol01670.out"
     gene            complement(join(338324..338825,344136..344627))
                     /locus_tag="wFol_02830"
                     /note="NAD-dependent epimerase/dehydratase family protein,
                     disrupted by IS-insertion"
                     /note="Uniprot:M9WV04"
                     /note="Uniprot:Q4E9F9"
                     /gene="galE"
                     /fasta_file="/home/lisa/Wolbachia_genomes/Genome_seqs/9_wol_genomes.faa:fasta/wFol01600.fasta.out"
                     /fasta_file="/home/lisa/Wolbachia_genomes/Genome_seqs/9_wol_genomes.faa:fasta/wFol01660.fasta.out"
                     /blastp_file="uniprot_all.fasta:blastp/wFol01600.out"
                     /blastp_file="uniprot_all.fasta:blastp/wFol01660.out"
     gene            complement(338807..340264)
                     /locus_tag="wFol_02840"
     CDS             complement(338807..340264)
                     /locus_tag="wFol_02840"
                     /product="Transposase, IS4 family"
                     /note="group IS50"
                     /note="Uniprot:A0A178GTG4"
                     /fasta_file="/home/lisa/Wolbachia_genomes/Genome_seqs/9_wol_genomes.faa:fasta/wFol01650.fasta.out"
                     /blastp_file="uniprot_all.fasta:blastp/wFol01650.out"
     gene            340321..340629
                     /locus_tag="wFol_02850"
                     /note="Transposase, IS5 family, truncation"
                     /note="Uniprot:A0A098AQX3"
                     /fasta_file="/home/lisa/Wolbachia_genomes/Genome_seqs/9_wol_genomes.faa:fasta/wFol01640.fasta.out"
                     /blastp_file="uniprot_all.fasta:blastp/wFol01640.out"
                     /pseudo
     gene            complement(340988..341956)
                     /locus_tag="wFol_02860"
     CDS             complement(340988..341956)
                     /locus_tag="wFol_02860"
                     /product="Transposase, IS110 family"
                     /note="no group"
                     /note="Uniprot:C0F949"
                     /fasta_file="/home/lisa/Wolbachia_genomes/Genome_seqs/9_wol_genomes.faa:fasta/wFol01630.fasta.out"
                     /blastp_file="uniprot_all.fasta:blastp/wFol01630.out"
     gene            complement(342192..343163)
                     /locus_tag="wFol_02870"
     CDS             complement(342192..343163)
                     /locus_tag="wFol_02870"
                     /product="Transposase, IS481 family"
                     /note="no group"
                     /note="Uniprot:A0A0D7PAZ1"
                     /fasta_file="/home/lisa/Wolbachia_genomes/Genome_seqs/9_wol_genomes.faa:fasta/wFol01620.fasta.out"
                     /blastp_file="uniprot_all.fasta:blastp/wFol01620.out"
     gene            343219..344127
                     /locus_tag="wFol_02880"
     CDS             343219..344127
                     /locus_tag="wFol_02880"
                     /product="Transposase, IS4 family"
                     /note="group IS50"
                     /note="Uniprot:A0A178GTG4"
                     /fasta_file="/home/lisa/Wolbachia_genomes/Genome_seqs/9_wol_genomes.faa:fasta/wFol01610.fasta.out"
                     /blastp_file="uniprot_all.fasta:blastp/wFol01610.out"
     misc_feature    344127..399460
                     /locus_tag="possible phage region"
     gene            344584..346911
                     /locus_tag="wFol_02890"
     CDS             344584..346911
                     /locus_tag="wFol_02890"
                     /product="Radical SAM protein"
                     /product="Glycosyl transferase, group 1 / radical SAM
                     family protein"
                     /note="Uniprot:A0A176Q8E7"
                     /note="Uniprot:M9WYQ0"
                     /fasta_file="/home/lisa/Wolbachia_genomes/Genome_seqs/9_wol_genomes.faa:fasta/wFol01580.fasta.out"
                     /fasta_file="/home/lisa/Wolbachia_genomes/Genome_seqs/9_wol_genomes.faa:fasta/wFol01590.fasta.out"
                     /blastp_file="uniprot_all.fasta:blastp/wFol01580.out"
                     /blastp_file="uniprot_all.fasta:blastp/wFol01590.out"
     gene            346872..348566
                     /locus_tag="wFol_02900"
     CDS             346872..348566
                     /locus_tag="wFol_02900"
                     /product="WD repeat domain protein"
                     /note="Uniprot:M9WS77"
                     /fasta_file="/home/lisa/Wolbachia_genomes/Genome_seqs/9_wol_genomes.faa:fasta/wFol01570.fasta.out"
                     /blastp_file="uniprot_all.fasta:blastp/wFol01570.out"
     gene            348571..349560
                     /locus_tag="wFol_02910"
     CDS             348571..349560
                     /locus_tag="wFol_02910"
                     /product="Phytanoyl-CoA dioxygenase (PhyH)"
                     /note="Uniprot:A0A098ARF0"
                     /fasta_file="/home/lisa/Wolbachia_genomes/Genome_seqs/9_wol_genomes.faa:fasta/wFol01560.fasta.out"
                     /blastp_file="uniprot_all.fasta:blastp/wFol01560.out"
     gene            349561..351354
                     /locus_tag="wFol_02920"
     CDS             349561..351354
                     /locus_tag="wFol_02920"
                     /product="ABC transporter, permease/ATP-binding protein"
                     /note="Uniprot:M9WTL9"
                     /fasta_file="/home/lisa/Wolbachia_genomes/Genome_seqs/9_wol_genomes.faa:fasta/wFol01550.fasta.out"
                     /blastp_file="uniprot_all.fasta:blastp/wFol01550.out"
     gene            351311..352387
                     /locus_tag="wFol_02930"
     CDS             351338..352387
                     /locus_tag="wFol_02930"
                     /product="L-allo-threonine aldolase"
                     /note="Uniprot:A0A098ATN5"
                     /fasta_file="/home/lisa/Wolbachia_genomes/Genome_seqs/9_wol_genomes.faa:fasta/wFol01540.fasta.out"
                     /blastp_file="uniprot_all.fasta:blastp/wFol01540.out"
     gene            352384..353427
                     /locus_tag="wFol_02940"
     CDS             352384..353427
                     /locus_tag="wFol_02940"
                     /product="L-allo-threonine aldolase"
                     /note="Uniprot:A0A059PCU6"
                     /fasta_file="/home/lisa/Wolbachia_genomes/Genome_seqs/9_wol_genomes.faa:fasta/wFol01530.fasta.out"
                     /blastp_file="uniprot_all.fasta:blastp/wFol01530.out"
     gene            353533..354756
                     /locus_tag="wFol_02950"
     CDS             353533..354756
                     /locus_tag="wFol_02950"
                     /product="Major facilitator family transporter"
                     /note="Uniprot:A0A059PCV2"
                     /fasta_file="/home/lisa/Wolbachia_genomes/Genome_seqs/9_wol_genomes.faa:fasta/wFol01520.fasta.out"
                     /blastp_file="uniprot_all.fasta:blastp/wFol01520.out"
     gene            complement(354759..356072)
                     /locus_tag="wFol_02960"
     CDS             complement(354759..356072)
                     /locus_tag="wFol_02960"
                     /product="UDP-glucose 6-dehydrogenase"
                     /note="Uniprot:A0A059PCV6"
                     /fasta_file="/home/lisa/Wolbachia_genomes/Genome_seqs/9_wol_genomes.faa:fasta/wFol01510.fasta.out"
                     /blastp_file="uniprot_all.fasta:blastp/wFol01510.out"
     gene            complement(356128..357003)
                     /locus_tag="wFol_02970"
     CDS             complement(356128..357003)
                     /locus_tag="wFol_02970"
                     /product="Putative membrane protein"
                     /note="Uniprot:A0A178GVV8"
                     /fasta_file="/home/lisa/Wolbachia_genomes/Genome_seqs/9_wol_genomes.faa:fasta/wFol01500.fasta.out"
                     /blastp_file="uniprot_all.fasta:blastp/wFol01500.out"
     gene            357770..358693
                     /locus_tag="wFol_02980"
                     /note="DNA ligase, truncation"
                     /note="Uniprot:A0A0P6NX77"
                     /fasta_file="/home/lisa/Wolbachia_genomes/Genome_seqs/9_wol_genomes.faa:fasta/wFol01490.fasta.out"
                     /blastp_file="uniprot_all.fasta:blastp/wFol01490.out"
                     /pseudo
     gene            358761..359051
                     /locus_tag="wFol_02990"
     CDS             358761..359051
                     /locus_tag="wFol_02990"
                     /product="Putative phage repressor protein"
                     /fasta_file="/home/lisa/Wolbachia_genomes/Genome_seqs/9_wol_genomes.faa:fasta/wFol01480.fasta.out"
                     /blastp_file="uniprot_all.fasta:blastp/wFol01480.out"
     gene            complement(359327..359863)
                     /locus_tag="wFol_03000"
     CDS             complement(359327..359863)
                     /locus_tag="wFol_03000"
                     /product="Ankyrin repeat domain protein"
                     /note="Uniprot:B3EU24"
                     /fasta_file="/home/lisa/Wolbachia_genomes/Genome_seqs/9_wol_genomes.faa:fasta/wFol01470.fasta.out"
                     /blastp_file="uniprot_all.fasta:blastp/wFol01470.out"
     gene            complement(359891..360679)
                     /locus_tag="wFol_03010"
     CDS             complement(359891..360679)
                     /locus_tag="wFol_03010"
                     /product="Ankyrin repeat domain protein"
                     /note="Uniprot:B3EU24"
                     /fasta_file="/home/lisa/Wolbachia_genomes/Genome_seqs/9_wol_genomes.faa:fasta/wFol01460.fasta.out"
                     /blastp_file="uniprot_all.fasta:blastp/wFol01460.out"
     gene            360787..361674
                     /locus_tag="wFol_03020"
     CDS             360787..361674
                     /locus_tag="wFol_03020"
                     /product="Transposase, PD-(D/E)XK nuclease family"
                     /note="Uniprot:A0A0P6P0B1"
                     /fasta_file="/home/lisa/Wolbachia_genomes/Genome_seqs/9_wol_genomes.faa:fasta/wFol01450.fasta.out"
                     /blastp_file="uniprot_all.fasta:blastp/wFol01450.out"
     gene            complement(362012..362905)
                     /locus_tag="wFol_03030"
     CDS             complement(362012..362905)
                     /locus_tag="wFol_03030"
                     /product="Uncharacterized protein"
                     /note="Uniprot:A0A0P6P4V3"
                     /fasta_file="/home/lisa/Wolbachia_genomes/Genome_seqs/9_wol_genomes.faa:fasta/wFol01440.fasta.out"
                     /blastp_file="uniprot_all.fasta:blastp/wFol01440.out"
     gene            complement(363516..365609)
                     /locus_tag="wFol_03040"
     CDS             complement(363516..365609)
                     /locus_tag="wFol_03040"
                     /product="Resolvase"
                     /note="Uniprot:A0A125SIR4"
                     /fasta_file="/home/lisa/Wolbachia_genomes/Genome_seqs/9_wol_genomes.faa:fasta/wFol01430.fasta.out"
                     /blastp_file="uniprot_all.fasta:blastp/wFol01430.out"
     gene            complement(366063..366410)
                     /locus_tag="wFol_03050"
                     /note="Putative reverse transcriptase, truncation"
                     /note="Uniprot:B3CMG0"
                     /fasta_file="/home/lisa/Wolbachia_genomes/Genome_seqs/9_wol_genomes.faa:fasta/wFol01410.fasta.out"
                     /blastp_file="uniprot_all.fasta:blastp/wFol01410.out"
                     /pseudo
     gene            complement(366954..367310)
                     /locus_tag="wFol_03060"
     CDS             complement(366954..367310)
                     /locus_tag="wFol_03060"
                     /product="Putative phage repressor protein"
                     /note="Uniprot:Q2GG40"
                     /fasta_file="/home/lisa/Wolbachia_genomes/Genome_seqs/9_wol_genomes.faa:fasta/wFol01400.fasta.out"
                     /blastp_file="uniprot_all.fasta:blastp/wFol01400.out"
     gene            367380..367730
                     /locus_tag="wFol_03070"
     CDS             367380..367730
                     /locus_tag="wFol_03070"
                     /product="Putative phage repressor protein"
                     /note="Uniprot:M9WT06"
                     /fasta_file="/home/lisa/Wolbachia_genomes/Genome_seqs/9_wol_genomes.faa:fasta/wFol01390.fasta.out"
                     /blastp_file="uniprot_all.fasta:blastp/wFol01390.out"
     gene            368180..368830
                     /locus_tag="wFol_03080"
     CDS             368180..368830
                     /locus_tag="wFol_03080"
                     /product="RadC family protein"
                     /note="Uniprot:A0A0P6NXS9"
                     /gene="radC"
                     /fasta_file="/home/lisa/Wolbachia_genomes/Genome_seqs/9_wol_genomes.faa:fasta/wFol01380.fasta.out"
                     /blastp_file="uniprot_all.fasta:blastp/wFol01380.out"
     gene            369085..369939
                     /locus_tag="wFol_03090"
     CDS             369085..369939
                     /locus_tag="wFol_03090"
                     /product="Transposase, IS110 family"
                     /note="no group"
                     /note="Uniprot:M9WYR7"
                     /fasta_file="/home/lisa/Wolbachia_genomes/Genome_seqs/9_wol_genomes.faa:fasta/wFol01370.fasta.out"
                     /blastp_file="uniprot_all.fasta:blastp/wFol01370.out"
     gene            369915..370247
                     /locus_tag="wFol_03100"
     CDS             369915..370247
                     /locus_tag="wFol_03100"
                     /product="Unique protein"
                     /fasta_file="/home/lisa/Wolbachia_genomes/Genome_seqs/9_wol_genomes.faa:fasta/wFol01360.fasta.out"
                     /blastp_file="uniprot_all.fasta:blastp/wFol01360.out"
     gene            370409..372502
                     /locus_tag="wFol_03110"
     CDS             370409..372502
                     /locus_tag="wFol_03110"
                     /product="Resolvase"
                     /note="Uniprot:A0A125SIR4"
                     /fasta_file="/home/lisa/Wolbachia_genomes/Genome_seqs/9_wol_genomes.faa:fasta/wFol01340.fasta.out"
                     /blastp_file="uniprot_all.fasta:blastp/wFol01340.out"
     gene            373113..374009
                     /locus_tag="wFol_03120"
     CDS             373113..374009
                     /locus_tag="wFol_03120"
                     /product="Uncharacterized protein"
                     /note="Uniprot:A0A0P6P4V3"
                     /fasta_file="/home/lisa/Wolbachia_genomes/Genome_seqs/9_wol_genomes.faa:fasta/wFol01330.fasta.out"
                     /blastp_file="uniprot_all.fasta:blastp/wFol01330.out"
     gene            complement(374155..374735)
                     /locus_tag="wFol_03130"
                     /note="Uncharacterized protein, contains frameshift
                     mutation"
                     /note="Uniprot:A0A0F3R3T9"
                     /note="Uniprot:M9WTS1"
                     /fasta_file="/home/lisa/Wolbachia_genomes/Genome_seqs/9_wol_genomes.faa:fasta/wFol01310.fasta.out"
                     /fasta_file="/home/lisa/Wolbachia_genomes/Genome_seqs/9_wol_genomes.faa:fasta/wFol01320.fasta.out"
                     /blastp_file="uniprot_all.fasta:blastp/wFol01310.out"
                     /blastp_file="uniprot_all.fasta:blastp/wFol01320.out"
                     /pseudo
     gene            complement(374928..375839)
                     /locus_tag="wFol_03140"
     CDS             complement(374928..375839)
                     /locus_tag="wFol_03140"
                     /product="Transposase, PD-(D/E)XK nuclease family"
                     /note="Uniprot:C0F997"
                     /fasta_file="/home/lisa/Wolbachia_genomes/Genome_seqs/9_wol_genomes.faa:fasta/wFol01300.fasta.out"
                     /blastp_file="uniprot_all.fasta:blastp/wFol01300.out"
     gene            complement(376387..376635)
                     /locus_tag="wFol_03150"
     CDS             complement(376387..376635)
                     /locus_tag="wFol_03150"
                     /product="Putative phage repressor protein"
                     /fasta_file="/home/lisa/Wolbachia_genomes/Genome_seqs/9_wol_genomes.faa:fasta/wFol01290.fasta.out"
                     /blastp_file="uniprot_all.fasta:blastp/wFol01290.out"
     gene            complement(376690..378741)
                     /locus_tag="wFol_03160"
     CDS             complement(376690..378741)
                     /locus_tag="wFol_03160"
                     /product="NAD-dependent DNA ligase LigA"
                     /product="DNA ligase (NAD(+)) LigA"
                     /note="Uniprot:A0A060PZP5"
                     /note="Uniprot:A0A178GUE3"
                     /gene="ligA"
                     /fasta_file="/home/lisa/Wolbachia_genomes/Genome_seqs/9_wol_genomes.faa:fasta/wFol01270.fasta.out"
                     /fasta_file="/home/lisa/Wolbachia_genomes/Genome_seqs/9_wol_genomes.faa:fasta/wFol01280.fasta.out"
                     /blastp_file="uniprot_all.fasta:blastp/wFol01270.out"
                     /blastp_file="uniprot_all.fasta:blastp/wFol01280.out"
     gene            complement(378773..379030)
                     /locus_tag="wFol_03170"
     CDS             complement(378773..379030)
                     /locus_tag="wFol_03170"
                     /product="Putative phage repressor protein"
                     /note="Uniprot:A0A0F3NLW9"
                     /fasta_file="/home/lisa/Wolbachia_genomes/Genome_seqs/9_wol_genomes.faa:fasta/wFol01260.fasta.out"
                     /blastp_file="uniprot_all.fasta:blastp/wFol01260.out"
     gene            complement(379055..379885)
                     /locus_tag="wFol_03180"
     CDS             complement(379055..379885)
                     /locus_tag="wFol_03180"
                     /product="Ankyrin repeat domain protein"
                     /note="Uniprot:M9WYP2"
                     /fasta_file="/home/lisa/Wolbachia_genomes/Genome_seqs/9_wol_genomes.faa:fasta/wFol01250.fasta.out"
                     /blastp_file="uniprot_all.fasta:blastp/wFol01250.out"
     gene            complement(380512..381429)
                     /locus_tag="wFol_03190"
     CDS             complement(380512..381429)
                     /locus_tag="wFol_03190"
                     /product="DNA methyltransferase"
                     /note="Uniprot:A0A060Q4M4"
                     /fasta_file="/home/lisa/Wolbachia_genomes/Genome_seqs/9_wol_genomes.faa:fasta/wFol01230.fasta.out"
                     /blastp_file="uniprot_all.fasta:blastp/wFol01230.out"
     gene            complement(381461..382387)
                     /locus_tag="wFol_03200"
     CDS             complement(381461..382387)
                     /locus_tag="wFol_03200"
                     /product="Patatin family protein"
                     /note="Uniprot:B6Y9T9"
                     /fasta_file="/home/lisa/Wolbachia_genomes/Genome_seqs/9_wol_genomes.faa:fasta/wFol01220.fasta.out"
                     /blastp_file="uniprot_all.fasta:blastp/wFol01220.out"
     gene            382388..382903
                     /locus_tag="wFol_03210"
     CDS             382388..382903
                     /locus_tag="wFol_03210"
                     /product="Phospholipase D-like protein"
                     /note="Uniprot:B3CP52"
                     /fasta_file="/home/lisa/Wolbachia_genomes/Genome_seqs/9_wol_genomes.faa:fasta/wFol01210.fasta.out"
                     /blastp_file="uniprot_all.fasta:blastp/wFol01210.out"
     gene            complement(382904..383143)
                     /locus_tag="wFol_03220"
     CDS             complement(382904..383143)
                     /locus_tag="wFol_03220"
                     /product="Putative membrane protein"
                     /note="Uniprot:B3CPQ8"
                     /fasta_file="/home/lisa/Wolbachia_genomes/Genome_seqs/9_wol_genomes.faa:fasta/wFol01200.fasta.out"
                     /blastp_file="uniprot_all.fasta:blastp/wFol01200.out"
     gene            complement(383231..383770)
                     /locus_tag="wFol_03230"
     CDS             complement(383231..383770)
                     /locus_tag="wFol_03230"
                     /product="Ankyrin repeat domain protein"
                     /note="Uniprot:A0A060PWB9"
                     /fasta_file="/home/lisa/Wolbachia_genomes/Genome_seqs/9_wol_genomes.faa:fasta/wFol01190.fasta.out"
                     /blastp_file="uniprot_all.fasta:blastp/wFol01190.out"
     gene            complement(383825..384781)
                     /locus_tag="wFol_03240"
     CDS             complement(383825..384781)
                     /locus_tag="wFol_03240"
                     /product="Phage late control gene D protein GpD"
                     /note="Uniprot:A0A0U1DBM8"
                     /fasta_file="/home/lisa/Wolbachia_genomes/Genome_seqs/9_wol_genomes.faa:fasta/wFol01180.fasta.out"
                     /blastp_file="uniprot_all.fasta:blastp/wFol01180.out"
     gene            complement(384781..384987)
                     /locus_tag="wFol_03250"
     CDS             complement(384781..384987)
                     /locus_tag="wFol_03250"
                     /product="Phage tail protein X"
                     /note="Uniprot:A0A176Q5G4"
                     /fasta_file="/home/lisa/Wolbachia_genomes/Genome_seqs/9_wol_genomes.faa:fasta/wFol01170.fasta.out"
                     /blastp_file="uniprot_all.fasta:blastp/wFol01170.out"
     gene            complement(384984..385331)
                     /locus_tag="wFol_03260"
     CDS             complement(384984..385331)
                     /locus_tag="wFol_03260"
                     /product="Phage tail assembly protein GpU"
                     /note="Uniprot:H0U3M5"
                     /fasta_file="/home/lisa/Wolbachia_genomes/Genome_seqs/9_wol_genomes.faa:fasta/wFol01160.fasta.out"
                     /blastp_file="uniprot_all.fasta:blastp/wFol01160.out"
     gene            complement(join(385331..386720,388240..389245))
                     /locus_tag="wFol_03270"
                     /note="Phage tail tape measure protein, disrupted by
                     IS-insertion"
                     /note="Uniprot:A0A176Q5G0"
                     /note="Uniprot:A0A176Q5G0"
                     /fasta_file="/home/lisa/Wolbachia_genomes/Genome_seqs/9_wol_genomes.faa:fasta/wFol01150.fasta.out"
                     /fasta_file="/home/lisa/Wolbachia_genomes/Genome_seqs/9_wol_genomes.faa:fasta/wFol01130.fasta.out"
                     /blastp_file="uniprot_all.fasta:blastp/wFol01150.out"
                     /blastp_file="uniprot_all.fasta:blastp/wFol01130.out"
                     /pseudo
     gene            complement(386715..388172)
                     /locus_tag="wFol_03280"
     CDS             complement(386715..388172)
                     /locus_tag="wFol_03280"
                     /product="Transposase, IS4 family"
                     /note="group IS50"
                     /note="Uniprot:A0A178GTG4"
                     /fasta_file="/home/lisa/Wolbachia_genomes/Genome_seqs/9_wol_genomes.faa:fasta/wFol01140.fasta.out"
                     /blastp_file="uniprot_all.fasta:blastp/wFol01140.out"
     gene            complement(389355..389612)
                     /locus_tag="wFol_03290"
     CDS             complement(389355..389612)
                     /locus_tag="wFol_03290"
                     /product="Phage tail assembly chaperone protein"
                     /note="Uniprot:B3CNY1"
                     /fasta_file="/home/lisa/Wolbachia_genomes/Genome_seqs/9_wol_genomes.faa:fasta/wFol01120.fasta.out"
                     /blastp_file="uniprot_all.fasta:blastp/wFol01120.out"
     gene            complement(389691..389972)
                     /locus_tag="wFol_03300"
     CDS             complement(389691..389972)
                     /locus_tag="wFol_03300"
                     /product="Toxin-antitoxin system, RelE/ParE toxin family"
                     /note="Uniprot:A0A098AQU0"
                     /fasta_file="/home/lisa/Wolbachia_genomes/Genome_seqs/9_wol_genomes.faa:fasta/wFol01110.fasta.out"
                     /blastp_file="uniprot_all.fasta:blastp/wFol01110.out"
     gene            complement(389956..390165)
                     /locus_tag="wFol_03310"
     CDS             complement(389956..390165)
                     /locus_tag="wFol_03310"
                     /product="Uncharacterized protein"
                     /note="Uniprot:A0A060PX44"
                     /fasta_file="/home/lisa/Wolbachia_genomes/Genome_seqs/9_wol_genomes.faa:fasta/wFol01100.fasta.out"
                     /blastp_file="uniprot_all.fasta:blastp/wFol01100.out"
     gene            complement(390228..390734)
                     /locus_tag="wFol_03320"
     CDS             complement(390228..390734)
                     /locus_tag="wFol_03320"
                     /product="Phage tail tube protein"
                     /note="Uniprot:A0A176Q5F0"
                     /fasta_file="/home/lisa/Wolbachia_genomes/Genome_seqs/9_wol_genomes.faa:fasta/wFol01090.fasta.out"
                     /blastp_file="uniprot_all.fasta:blastp/wFol01090.out"
     gene            complement(390753..391928)
                     /locus_tag="wFol_03330"
     CDS             complement(390753..391928)
                     /locus_tag="wFol_03330"
                     /product="Phage tail sheath protein"
                     /note="Uniprot:B9A923"
                     /fasta_file="/home/lisa/Wolbachia_genomes/Genome_seqs/9_wol_genomes.faa:fasta/wFol01080.fasta.out"
                     /blastp_file="uniprot_all.fasta:blastp/wFol01080.out"
     gene            complement(392060..392638)
                     /locus_tag="wFol_03340"
     CDS             complement(392060..392638)
                     /locus_tag="wFol_03340"
                     /product="Putative phage related protein"
                     /note="Uniprot:A0A0P6NU40"
                     /fasta_file="/home/lisa/Wolbachia_genomes/Genome_seqs/9_wol_genomes.faa:fasta/wFol01070.fasta.out"
                     /blastp_file="uniprot_all.fasta:blastp/wFol01070.out"
     gene            complement(392651..394002)
                     /locus_tag="wFol_03350"
                     /note="Putative phage protein, contains frameshift
                     mutation"
                     /note="Uniprot:A0A178GUW8"
                     /note="Uniprot:A0A0P6NN57"
                     /fasta_file="/home/lisa/Wolbachia_genomes/Genome_seqs/9_wol_genomes.faa:fasta/wFol01060.fasta.out"
                     /fasta_file="/home/lisa/Wolbachia_genomes/Genome_seqs/9_wol_genomes.faa:fasta/wFol01050.fasta.out"
                     /blastp_file="uniprot_all.fasta:blastp/wFol01060.out"
                     /blastp_file="uniprot_all.fasta:blastp/wFol01050.out"
                     /pseudo
     gene            complement(393999..394199)
                     /locus_tag="wFol_03360"
     CDS             complement(393999..394199)
                     /locus_tag="wFol_03360"
                     /product="Putative phage related protein"
                     /note="Uniprot:A0A0P6NQG3"
                     /fasta_file="/home/lisa/Wolbachia_genomes/Genome_seqs/9_wol_genomes.faa:fasta/wFol01040.fasta.out"
                     /blastp_file="uniprot_all.fasta:blastp/wFol01040.out"
     gene            complement(394204..395397)
                     /locus_tag="wFol_03370"
     CDS             complement(394204..395397)
                     /locus_tag="wFol_03370"
                     /product="Putative phage related protein"
                     /note="Uniprot:A0A098ARQ4"
                     /fasta_file="/home/lisa/Wolbachia_genomes/Genome_seqs/9_wol_genomes.faa:fasta/wFol01030.fasta.out"
                     /blastp_file="uniprot_all.fasta:blastp/wFol01030.out"
     gene            complement(395434..396018)
                     /locus_tag="wFol_03380"
                     /note="Putative phage related protein, disrupted by
                     transposable element"
                     /note="Uniprot:B3CNX3"
                     /fasta_file="/home/lisa/Wolbachia_genomes/Genome_seqs/9_wol_genomes.faa:fasta/wFol01020.fasta.out"
                     /blastp_file="uniprot_all.fasta:blastp/wFol01020.out"
                     /pseudo
     gene            complement(396043..398136)
                     /locus_tag="wFol_03390"
     CDS             complement(396043..398136)
                     /locus_tag="wFol_03390"
                     /product="Resolvase"
                     /note="Uniprot:A0A125SIR4"
                     /fasta_file="/home/lisa/Wolbachia_genomes/Genome_seqs/9_wol_genomes.faa:fasta/wFol01010.fasta.out"
                     /blastp_file="uniprot_all.fasta:blastp/wFol01010.out"
     gene            complement(398298..398630)
                     /locus_tag="wFol_03400"
     CDS             complement(398298..398630)
                     /locus_tag="wFol_03400"
                     /product="Unique protein"
                     /fasta_file="/home/lisa/Wolbachia_genomes/Genome_seqs/9_wol_genomes.faa:fasta/wFol00990.fasta.out"
                     /blastp_file="uniprot_all.fasta:blastp/wFol00990.out"
     gene            complement(398606..399460)
                     /locus_tag="wFol_03410"
     CDS             complement(398606..399460)
                     /locus_tag="wFol_03410"
                     /product="Transposase, IS110 family"
                     /note="no group"
                     /note="Uniprot:M9WYR7"
                     /fasta_file="/home/lisa/Wolbachia_genomes/Genome_seqs/9_wol_genomes.faa:fasta/wFol00980.fasta.out"
                     /blastp_file="uniprot_all.fasta:blastp/wFol00980.out"
     gene            complement(400329..401675)
                     /locus_tag="wFol_03420"
     CDS             complement(400329..401675)
                     /locus_tag="wFol_03420"
                     /product="DNA repair protein RadA"
                     /note="Uniprot:A0A098AS26"
                     /gene="radA"
                     /fasta_file="/home/lisa/Wolbachia_genomes/Genome_seqs/9_wol_genomes.faa:fasta/wFol00960.fasta.out"
                     /blastp_file="uniprot_all.fasta:blastp/wFol00960.out"
     gene            401768..402403
                     /locus_tag="wFol_03430"
     CDS             401768..402403
                     /locus_tag="wFol_03430"
                     /product="LssY C-terminus domain protein"
                     /fasta_file="/home/lisa/Wolbachia_genomes/Genome_seqs/9_wol_genomes.faa:fasta/wFol00950.fasta.out"
                     /blastp_file="uniprot_all.fasta:blastp/wFol00950.out"
     gene            402532..403308
                     /locus_tag="wFol_03440"
     CDS             402532..403308
                     /locus_tag="wFol_03440"
                     /product="Putative membrane protein"
                     /fasta_file="/home/lisa/Wolbachia_genomes/Genome_seqs/9_wol_genomes.faa:fasta/wFol00940.fasta.out"
                     /blastp_file="uniprot_all.fasta:blastp/wFol00940.out"
     gene            403481..404737
                     /locus_tag="wFol_03450"
     CDS             403481..404737
                     /locus_tag="wFol_03450"
                     /product="DnaJ domain protein"
                     /note="Uniprot:A0A0P6NSH3"
                     /fasta_file="/home/lisa/Wolbachia_genomes/Genome_seqs/9_wol_genomes.faa:fasta/wFol00930.fasta.out"
                     /blastp_file="uniprot_all.fasta:blastp/wFol00930.out"
     gene            404838..406133
                     /locus_tag="wFol_03460"
     CDS             404838..406133
                     /locus_tag="wFol_03460"
                     /product="Amino acid permease"
                     /note="Uniprot:A0A176Q7Y9"
                     /fasta_file="/home/lisa/Wolbachia_genomes/Genome_seqs/9_wol_genomes.faa:fasta/wFol00920.fasta.out"
                     /blastp_file="uniprot_all.fasta:blastp/wFol00920.out"
     gene            complement(406053..407435)
                     /locus_tag="wFol_03470"
     CDS             complement(406053..407435)
                     /locus_tag="wFol_03470"
                     /product="Isopentenyl-adenosine A37 tRNA methylthiolase"
                     /note="Uniprot:M9WSI1"
                     /gene="miaB"
                     /fasta_file="/home/lisa/Wolbachia_genomes/Genome_seqs/9_wol_genomes.faa:fasta/wFol00910.fasta.out"
                     /blastp_file="uniprot_all.fasta:blastp/wFol00910.out"
     gene            complement(407549..408199)
                     /locus_tag="wFol_03480"
     CDS             complement(407549..408199)
                     /locus_tag="wFol_03480"
                     /product="Endonuclease III"
                     /note="Uniprot:A0A178GTH1"
                     /gene="nth"
                     /fasta_file="/home/lisa/Wolbachia_genomes/Genome_seqs/9_wol_genomes.faa:fasta/wFol00900.fasta.out"
                     /blastp_file="uniprot_all.fasta:blastp/wFol00900.out"
     gene            complement(408266..409057)
                     /locus_tag="wFol_03490"
     CDS             complement(408266..409057)
                     /locus_tag="wFol_03490"
                     /product="Diaminopimelate epimerase"
                     /note="Uniprot:A0A178GSK2"
                     /gene="dapF"
                     /fasta_file="/home/lisa/Wolbachia_genomes/Genome_seqs/9_wol_genomes.faa:fasta/wFol00890.fasta.out"
                     /blastp_file="uniprot_all.fasta:blastp/wFol00890.out"
     gene            complement(409160..409450)
                     /locus_tag="wFol_03500"
     CDS             complement(409160..409450)
                     /locus_tag="wFol_03500"
                     /product="GIY-YIG nuclease"
                     /note="Uniprot:M9WXS6"
                     /fasta_file="/home/lisa/Wolbachia_genomes/Genome_seqs/9_wol_genomes.faa:fasta/wFol00880.fasta.out"
                     /blastp_file="uniprot_all.fasta:blastp/wFol00880.out"
     gene            complement(409776..411146)
                     /locus_tag="wFol_03510"
     CDS             complement(409776..411146)
                     /locus_tag="wFol_03510"
                     /product="Ankyrin repeat domain protein"
                     /fasta_file="/home/lisa/Wolbachia_genomes/Genome_seqs/9_wol_genomes.faa:fasta/wFol00870.fasta.out"
                     /blastp_file="uniprot_all.fasta:blastp/wFol00870.out"
     gene            411380..412471
                     /locus_tag="wFol_03520"
     CDS             411380..412471
                     /locus_tag="wFol_03520"
                     /product="Glycosyl hydrolase family 5 protein"
                     /note="Uniprot:A0A0U1D842"
                     /fasta_file="/home/lisa/Wolbachia_genomes/Genome_seqs/9_wol_genomes.faa:fasta/wFol00860.fasta.out"
                     /blastp_file="uniprot_all.fasta:blastp/wFol00860.out"
     gene            complement(412473..413027)
                     /locus_tag="wFol_03530"
     CDS             complement(412473..413027)
                     /locus_tag="wFol_03530"
                     /product="Nitroreductase family protein"
                     /note="Uniprot:M9X0S4"
                     /fasta_file="/home/lisa/Wolbachia_genomes/Genome_seqs/9_wol_genomes.faa:fasta/wFol00850.fasta.out"
                     /blastp_file="uniprot_all.fasta:blastp/wFol00850.out"
     gene            413141..413683
                     /locus_tag="wFol_03540"
     CDS             413141..413683
                     /locus_tag="wFol_03540"
                     /product="BioY family protein"
                     /note="Uniprot:H0U2I3"
                     /fasta_file="/home/lisa/Wolbachia_genomes/Genome_seqs/9_wol_genomes.faa:fasta/wFol00840.fasta.out"
                     /blastp_file="uniprot_all.fasta:blastp/wFol00840.out"
     gene            413680..414078
                     /locus_tag="wFol_03550"
     CDS             413680..414078
                     /locus_tag="wFol_03550"
                     /product="Uncharacterized protein"
                     /note="Uniprot:A0A0P6NRC7"
                     /fasta_file="/home/lisa/Wolbachia_genomes/Genome_seqs/9_wol_genomes.faa:fasta/wFol00830.fasta.out"
                     /blastp_file="uniprot_all.fasta:blastp/wFol00830.out"
     tRNA            414138..414210
                     /ID="tRNA:Ala"
                     /Codon="TGC"
                     /score=78.40
                     /Name="tRNA:Ala"
                     /AminoAcid="Ala"
     gene            414567..415199
                     /locus_tag="wFol_03560"
     CDS             414567..415199
                     /locus_tag="wFol_03560"
                     /product="Uncharacterized protein"
                     /note="Uniprot:M9WN72"
                     /fasta_file="/home/lisa/Wolbachia_genomes/Genome_seqs/9_wol_genomes.faa:fasta/wFol00820.fasta.out"
                     /blastp_file="uniprot_all.fasta:blastp/wFol00820.out"
     gene            415516..416601
                     /locus_tag="wFol_03570"
     CDS             415516..416601
                     /locus_tag="wFol_03570"
                     /product="Unique protein"
                     /fasta_file="/home/lisa/Wolbachia_genomes/Genome_seqs/9_wol_genomes.faa:fasta/wFol00800.fasta.out"
                     /blastp_file="uniprot_all.fasta:blastp/wFol00800.out"
     gene            416676..417902
                     /locus_tag="wFol_03580"
     CDS             416676..417902
                     /locus_tag="wFol_03580"
                     /product="Ankyrin repeat domain protein"
                     /note="Uniprot:B3ETJ2"
                     /fasta_file="/home/lisa/Wolbachia_genomes/Genome_seqs/9_wol_genomes.faa:fasta/wFol00790.fasta.out"
                     /blastp_file="uniprot_all.fasta:blastp/wFol00790.out"
     gene            complement(418085..419737)
                     /locus_tag="wFol_03590"
     CDS             complement(418085..419737)
                     /locus_tag="wFol_03590"
                     /product="Site-specific recombinase, resolvase family"
                     /note="Uniprot:A0A059PCU0"
                     /fasta_file="/home/lisa/Wolbachia_genomes/Genome_seqs/9_wol_genomes.faa:fasta/wFol00780.fasta.out"
                     /blastp_file="uniprot_all.fasta:blastp/wFol00780.out"
     misc_feature    418085..441317
                     /locus_tag="possible phage region"
     gene            complement(419721..420173)
                     /locus_tag="wFol_03600"
     CDS             complement(419721..420173)
                     /locus_tag="wFol_03600"
                     /product="Uncharacterized protein"
                     /note="Uniprot:W6TU00"
                     /fasta_file="/home/lisa/Wolbachia_genomes/Genome_seqs/9_wol_genomes.faa:fasta/wFol00770.fasta.out"
                     /blastp_file="uniprot_all.fasta:blastp/wFol00770.out"
     gene            complement(420275..420631)
                     /locus_tag="wFol_03610"
                     /note="Putative cassette chromosome recombinase resolvase,
                     CcrB-like protein, truncation"
                     /note="Uniprot:C0R3L2"
                     /fasta_file="/home/lisa/Wolbachia_genomes/Genome_seqs/9_wol_genomes.faa:fasta/wFol00760.fasta.out"
                     /blastp_file="uniprot_all.fasta:blastp/wFol00760.out"
                     /pseudo
     gene            complement(420750..421364)
                     /locus_tag="wFol_03620"
     CDS             complement(420750..421364)
                     /locus_tag="wFol_03620"
                     /product="Ankyrin repeat domain protein"
                     /note="Uniprot:C0R4T7"
                     /fasta_file="/home/lisa/Wolbachia_genomes/Genome_seqs/9_wol_genomes.faa:fasta/wFol00750.fasta.out"
                     /blastp_file="uniprot_all.fasta:blastp/wFol00750.out"
     gene            complement(421537..422079)
                     /locus_tag="wFol_03630"
                     /note="Phage tail protein, truncation"
                     /note="Uniprot:Q73I92"
                     /fasta_file="/home/lisa/Wolbachia_genomes/Genome_seqs/9_wol_genomes.faa:fasta/wFol00740.fasta.out"
                     /blastp_file="uniprot_all.fasta:blastp/wFol00740.out"
                     /pseudo
     gene            422342..423196
                     /locus_tag="wFol_03640"
     CDS             422342..423196
                     /locus_tag="wFol_03640"
                     /product="Transposase, IS110 family"
                     /note="no group"
                     /note="Uniprot:M9WYR7"
                     /fasta_file="/home/lisa/Wolbachia_genomes/Genome_seqs/9_wol_genomes.faa:fasta/wFol00730.fasta.out"
                     /blastp_file="uniprot_all.fasta:blastp/wFol00730.out"
     gene            423172..423504
                     /locus_tag="wFol_03650"
     CDS             423172..423504
                     /locus_tag="wFol_03650"
                     /product="Unique protein"
                     /fasta_file="/home/lisa/Wolbachia_genomes/Genome_seqs/9_wol_genomes.faa:fasta/wFol00720.fasta.out"
                     /blastp_file="uniprot_all.fasta:blastp/wFol00720.out"
     gene            423666..425759
                     /locus_tag="wFol_03660"
     CDS             423666..425759
                     /locus_tag="wFol_03660"
                     /product="Resolvase"
                     /note="Uniprot:A0A125SIR4"
                     /fasta_file="/home/lisa/Wolbachia_genomes/Genome_seqs/9_wol_genomes.faa:fasta/wFol00700.fasta.out"
                     /blastp_file="uniprot_all.fasta:blastp/wFol00700.out"
     gene            425791..426789
                     /locus_tag="wFol_03670"
                     /note="Group II intron reverse transcriptase/maturase,
                     truncation"
                     /note="Uniprot:A0A178GX43"
                     /fasta_file="/home/lisa/Wolbachia_genomes/Genome_seqs/9_wol_genomes.faa:fasta/wFol00690.fasta.out"
                     /blastp_file="uniprot_all.fasta:blastp/wFol00690.out"
                     /pseudo
     gene            complement(427140..441317)
                     /locus_tag="wFol_03680"
     CDS             complement(427140..441317)
                     /locus_tag="wFol_03680"
                     /product="Latrotoxin and ankyrin repeat domain protein"
                     /note="Uniprot:A0A178GYN6"
                     /fasta_file="/home/lisa/Wolbachia_genomes/Genome_seqs/9_wol_genomes.faa:fasta/wFol00680.fasta.out"
                     /blastp_file="uniprot_all.fasta:blastp/wFol00680.out"
     gene            complement(442269..443657)
                     /locus_tag="wFol_03690"
     CDS             complement(442269..443657)
                     /locus_tag="wFol_03690"
                     /product="Fumarate hydratase class II"
                     /note="Uniprot:M9WTT7"
                     /gene="fumC"
                     /fasta_file="/home/lisa/Wolbachia_genomes/Genome_seqs/9_wol_genomes.faa:fasta/wFol00660.fasta.out"
                     /blastp_file="uniprot_all.fasta:blastp/wFol00660.out"
     gene            complement(443840..444493)
                     /locus_tag="wFol_03700"
     CDS             complement(443840..444493)
                     /locus_tag="wFol_03700"
                     /product="Putative membrane protein"
                     /fasta_file="/home/lisa/Wolbachia_genomes/Genome_seqs/9_wol_genomes.faa:fasta/wFol00650.fasta.out"
                     /blastp_file="uniprot_all.fasta:blastp/wFol00650.out"
     gene            444902..448489
                     /locus_tag="wFol_03710"
     CDS             444902..448489
                     /locus_tag="wFol_03710"
                     /product="Putative membrane protein"
                     /fasta_file="/home/lisa/Wolbachia_genomes/Genome_seqs/9_wol_genomes.faa:fasta/wFol00640.fasta.out"
                     /blastp_file="uniprot_all.fasta:blastp/wFol00640.out"
     gene            complement(448779..451121)
                     /locus_tag="wFol_03720"
     CDS             complement(448779..451121)
                     /locus_tag="wFol_03720"
                     /product="ATP-dependent Clp protease, ATP-binding subunit
                     ClpA"
                     /note="Uniprot:C0R4Q4"
                     /gene="clpA"
                     /fasta_file="/home/lisa/Wolbachia_genomes/Genome_seqs/9_wol_genomes.faa:fasta/wFol00630.fasta.out"
                     /blastp_file="uniprot_all.fasta:blastp/wFol00630.out"
     gene            complement(451385..452884)
                     /locus_tag="wFol_03730"
     CDS             complement(451385..452884)
                     /locus_tag="wFol_03730"
                     /product="ATP-dependent protease ATPase subunit HslU"
                     /note="Uniprot:A0A178GS63"
                     /gene="hslU"
                     /fasta_file="/home/lisa/Wolbachia_genomes/Genome_seqs/9_wol_genomes.faa:fasta/wFol00620.fasta.out"
                     /blastp_file="uniprot_all.fasta:blastp/wFol00620.out"
     gene            complement(452892..453440)
                     /locus_tag="wFol_03740"
     CDS             complement(452892..453440)
                     /locus_tag="wFol_03740"
                     /product="ATP-dependent protease subunit HslV"
                     /note="Uniprot:A0A0P6NLG7"
                     /gene="hslV"
                     /fasta_file="/home/lisa/Wolbachia_genomes/Genome_seqs/9_wol_genomes.faa:fasta/wFol00610.fasta.out"
                     /blastp_file="uniprot_all.fasta:blastp/wFol00610.out"
     gene            453557..454714
                     /locus_tag="wFol_03750"
     CDS             453557..454714
                     /locus_tag="wFol_03750"
                     /product="Glutamate-cysteine ligase"
                     /note="Uniprot:M9WT89"
                     /fasta_file="/home/lisa/Wolbachia_genomes/Genome_seqs/9_wol_genomes.faa:fasta/wFol00600.fasta.out"
                     /blastp_file="uniprot_all.fasta:blastp/wFol00600.out"
     gene            complement(454749..455342)
                     /locus_tag="wFol_03760"
     CDS             complement(454749..455342)
                     /locus_tag="wFol_03760"
                     /product="Uncharacterized protein"
                     /note="Uniprot:Q73FT1"
                     /fasta_file="/home/lisa/Wolbachia_genomes/Genome_seqs/9_wol_genomes.faa:fasta/wFol00590.fasta.out"
                     /blastp_file="uniprot_all.fasta:blastp/wFol00590.out"
     gene            complement(455546..457030)
                     /locus_tag="wFol_03770"
     CDS             complement(455546..457030)
                     /locus_tag="wFol_03770"
                     /product="3-octaprenyl-4-hydroxybenzoate carboxy-lyase"
                     /note="Uniprot:A0A098AT04"
                     /gene="ubiD"
                     /fasta_file="/home/lisa/Wolbachia_genomes/Genome_seqs/9_wol_genomes.faa:fasta/wFol00570.fasta.out"
                     /blastp_file="uniprot_all.fasta:blastp/wFol00570.out"
     gene            457198..458454
                     /locus_tag="wFol_03780"
     CDS             457198..458454
                     /locus_tag="wFol_03780"
                     /product="Unique protein"
                     /fasta_file="/home/lisa/Wolbachia_genomes/Genome_seqs/9_wol_genomes.faa:fasta/wFol00560.fasta.out"
                     /blastp_file="uniprot_all.fasta:blastp/wFol00560.out"
     gene            458598..463925
                     /locus_tag="wFol_03790"
     CDS             458598..463925
                     /locus_tag="wFol_03790"
                     /product="Helicase superfamily 1/2, ATP-binding domain
                     protein"
                     /note="Uniprot:B3CPG0"
                     /fasta_file="/home/lisa/Wolbachia_genomes/Genome_seqs/9_wol_genomes.faa:fasta/wFol00550.fasta.out"
                     /blastp_file="uniprot_all.fasta:blastp/wFol00550.out"
     gene            complement(464078..464773)
                     /locus_tag="wFol_03800"
     CDS             complement(464078..464773)
                     /locus_tag="wFol_03800"
                     /product="DNA polymerase III, epsilon subunit"
                     /note="Uniprot:A0A0P6NVP6"
                     /gene="dnaQ"
                     /fasta_file="/home/lisa/Wolbachia_genomes/Genome_seqs/9_wol_genomes.faa:fasta/wFol00540.fasta.out"
                     /blastp_file="uniprot_all.fasta:blastp/wFol00540.out"
     gene            complement(464803..465468)
                     /locus_tag="wFol_03810"
     CDS             complement(464803..465468)
                     /locus_tag="wFol_03810"
                     /product="Tim44 domain protein"
                     /note="Uniprot:I7II05"
                     /note="Uniprot:C0R5E9"
                     /fasta_file="/home/lisa/Wolbachia_genomes/Genome_seqs/9_wol_genomes.faa:fasta/wFol00530.fasta.out"
                     /fasta_file="/home/lisa/Wolbachia_genomes/Genome_seqs/9_wol_genomes.faa:fasta/wFol00520.fasta.out"
                     /blastp_file="uniprot_all.fasta:blastp/wFol00530.out"
                     /blastp_file="uniprot_all.fasta:blastp/wFol00520.out"
     gene            465636..466139
                     /locus_tag="wFol_03820"
     CDS             465636..466139
                     /locus_tag="wFol_03820"
                     /product="Preprotein translocase subunit SecB"
                     /note="Uniprot:A0A178GVS9"
                     /gene="secB"
                     /fasta_file="/home/lisa/Wolbachia_genomes/Genome_seqs/9_wol_genomes.faa:fasta/wFol00510.fasta.out"
                     /blastp_file="uniprot_all.fasta:blastp/wFol00510.out"
     gene            466184..468802
                     /locus_tag="wFol_03830"
     CDS             466184..468802
                     /locus_tag="wFol_03830"
                     /product="Aconitate hydratase"
                     /note="Uniprot:A0A178GVK7"
                     /fasta_file="/home/lisa/Wolbachia_genomes/Genome_seqs/9_wol_genomes.faa:fasta/wFol00500.fasta.out"
                     /blastp_file="uniprot_all.fasta:blastp/wFol00500.out"
     gene            complement(468950..469780)
                     /locus_tag="wFol_03840"
     CDS             complement(468950..469780)
                     /locus_tag="wFol_03840"
                     /product="Surface antigen Wsp-like protein"
                     /note="Uniprot:Q73IY3"
                     /fasta_file="/home/lisa/Wolbachia_genomes/Genome_seqs/9_wol_genomes.faa:fasta/wFol00490.fasta.out"
                     /blastp_file="uniprot_all.fasta:blastp/wFol00490.out"
     gene            complement(470043..470411)
                     /locus_tag="wFol_03850"
     CDS             complement(470043..470411)
                     /locus_tag="wFol_03850"
                     /product="Unique protein"
                     /fasta_file="/home/lisa/Wolbachia_genomes/Genome_seqs/9_wol_genomes.faa:fasta/wFol00480.fasta.out"
                     /blastp_file="uniprot_all.fasta:blastp/wFol00480.out"
     gene            complement(470509..470964)
                     /locus_tag="wFol_03860"
     CDS             complement(470509..470964)
                     /locus_tag="wFol_03860"
                     /product="ABC transporter, periplasmic substrate-binding
                     protein"
                     /note="Uniprot:M9X0H8"
                     /fasta_file="/home/lisa/Wolbachia_genomes/Genome_seqs/9_wol_genomes.faa:fasta/wFol00470.fasta.out"
                     /blastp_file="uniprot_all.fasta:blastp/wFol00470.out"
     gene            complement(470967..471281)
                     /locus_tag="wFol_03870"
     CDS             complement(470967..471281)
                     /locus_tag="wFol_03870"
                     /product="NADH ubiquinone oxidoreductase subunit NDUFA12"
                     /note="Uniprot:Q73G57"
                     /fasta_file="/home/lisa/Wolbachia_genomes/Genome_seqs/9_wol_genomes.faa:fasta/wFol00460.fasta.out"
                     /blastp_file="uniprot_all.fasta:blastp/wFol00460.out"
     gene            471346..472845
                     /locus_tag="wFol_03880"
     CDS             471346..472845
                     /locus_tag="wFol_03880"
                     /product="Monovalent cation/H+ antiporter subunit D"
                     /note="Uniprot:A0A098ARX3"
                     /gene="mrpD"
                     /fasta_file="/home/lisa/Wolbachia_genomes/Genome_seqs/9_wol_genomes.faa:fasta/wFol00450.fasta.out"
                     /blastp_file="uniprot_all.fasta:blastp/wFol00450.out"
     gene            472962..474161
                     /locus_tag="wFol_03890"
     CDS             472962..474161
                     /locus_tag="wFol_03890"
                     /product="Ankyrin repeat domain protein"
                     /note="Uniprot:A9UQP0"
                     /fasta_file="/home/lisa/Wolbachia_genomes/Genome_seqs/9_wol_genomes.faa:fasta/wFol00440.fasta.out"
                     /blastp_file="uniprot_all.fasta:blastp/wFol00440.out"
     gene            474595..475080
                     /locus_tag="wFol_03900"
     CDS             474595..475080
                     /locus_tag="wFol_03900"
                     /product="Unique protein"
                     /fasta_file="/home/lisa/Wolbachia_genomes/Genome_seqs/9_wol_genomes.faa:fasta/wFol00420.fasta.out"
                     /blastp_file="uniprot_all.fasta:blastp/wFol00420.out"
     gene            475158..477494
                     /locus_tag="wFol_03910"
     CDS             475158..477494
                     /locus_tag="wFol_03910"
                     /product="Putative membrane protein"
                     /note="Uniprot:M9WW42"
                     /fasta_file="/home/lisa/Wolbachia_genomes/Genome_seqs/9_wol_genomes.faa:fasta/wFol00410.fasta.out"
                     /blastp_file="uniprot_all.fasta:blastp/wFol00410.out"
     gene            477795..478532
                     /locus_tag="wFol_03920"
     CDS             477795..478532
                     /locus_tag="wFol_03920"
                     /product="Uncharacterized protein"
                     /note="Uniprot:C0R3B9"
                     /fasta_file="/home/lisa/Wolbachia_genomes/Genome_seqs/9_wol_genomes.faa:fasta/wFol00400.fasta.out"
                     /blastp_file="uniprot_all.fasta:blastp/wFol00400.out"
     gene            complement(478578..479807)
                     /locus_tag="wFol_03930"
     CDS             complement(478578..479807)
                     /locus_tag="wFol_03930"
                     /product="N5-carboxyaminoimidazole ribonucleotide
                     synthase"
                     /note="Uniprot:H0U391"
                     /gene="purK"
                     /fasta_file="/home/lisa/Wolbachia_genomes/Genome_seqs/9_wol_genomes.faa:fasta/wFol00390.fasta.out"
                     /blastp_file="uniprot_all.fasta:blastp/wFol00390.out"
     gene            479912..480316
                     /locus_tag="wFol_03940"
     CDS             479912..480316
                     /locus_tag="wFol_03940"
                     /product="Protein ApaG"
                     /note="Uniprot:I7JEG9"
                     /gene="apaG"
                     /fasta_file="/home/lisa/Wolbachia_genomes/Genome_seqs/9_wol_genomes.faa:fasta/wFol00380.fasta.out"
                     /blastp_file="uniprot_all.fasta:blastp/wFol00380.out"
     gene            complement(480403..481107)
                     /locus_tag="wFol_03950"
     CDS             complement(480403..481107)
                     /locus_tag="wFol_03950"
                     /product="Putative membrane protein"
                     /fasta_file="/home/lisa/Wolbachia_genomes/Genome_seqs/9_wol_genomes.faa:fasta/wFol00370.fasta.out"
                     /blastp_file="uniprot_all.fasta:blastp/wFol00370.out"
     gene            complement(481258..481656)
                     /locus_tag="wFol_03960"
     CDS             complement(481258..481656)
                     /locus_tag="wFol_03960"
                     /product="Unique protein"
                     /fasta_file="/home/lisa/Wolbachia_genomes/Genome_seqs/9_wol_genomes.faa:fasta/wFol00360.fasta.out"
                     /blastp_file="uniprot_all.fasta:blastp/wFol00360.out"
     gene            481822..482148
                     /locus_tag="wFol_03970"
     CDS             481822..482148
                     /locus_tag="wFol_03970"
                     /product="Putative membrane protein"
                     /note="Uniprot:A0A059IW96"
                     /fasta_file="/home/lisa/Wolbachia_genomes/Genome_seqs/9_wol_genomes.faa:fasta/wFol00350.fasta.out"
                     /blastp_file="uniprot_all.fasta:blastp/wFol00350.out"
     gene            complement(482145..483416)
                     /locus_tag="wFol_03980"
     CDS             complement(482145..483416)
                     /locus_tag="wFol_03980"
                     /product="Peptidase, M16 family"
                     /note="Uniprot:A0A178GVD5"
                     /fasta_file="/home/lisa/Wolbachia_genomes/Genome_seqs/9_wol_genomes.faa:fasta/wFol00340.fasta.out"
                     /blastp_file="uniprot_all.fasta:blastp/wFol00340.out"
     gene            complement(483423..484052)
                     /locus_tag="wFol_03990"
     CDS             complement(483423..484052)
                     /locus_tag="wFol_03990"
                     /product="Superoxide dismutase"
                     /note="Uniprot:A0A178GUJ8"
                     /fasta_file="/home/lisa/Wolbachia_genomes/Genome_seqs/9_wol_genomes.faa:fasta/wFol00330.fasta.out"
                     /blastp_file="uniprot_all.fasta:blastp/wFol00330.out"
     gene            complement(484167..485093)
                     /locus_tag="wFol_04000"
     CDS             complement(484167..485093)
                     /locus_tag="wFol_04000"
                     /product="Putative membrane protein"
                     /fasta_file="/home/lisa/Wolbachia_genomes/Genome_seqs/9_wol_genomes.faa:fasta/wFol00320.fasta.out"
                     /blastp_file="uniprot_all.fasta:blastp/wFol00320.out"
     gene            485427..486575
                     /locus_tag="wFol_04010"
     CDS             485427..486575
                     /locus_tag="wFol_04010"
                     /product="Haloacid dehydrogenase (HAD) superfamily
                     protein"
                     /fasta_file="/home/lisa/Wolbachia_genomes/Genome_seqs/9_wol_genomes.faa:fasta/wFol00310.fasta.out"
                     /blastp_file="uniprot_all.fasta:blastp/wFol00310.out"
     gene            complement(486711..487628)
                     /locus_tag="wFol_04020"
     CDS             complement(486711..487628)
                     /locus_tag="wFol_04020"
                     /product="Putative membrane protein"
                     /fasta_file="/home/lisa/Wolbachia_genomes/Genome_seqs/9_wol_genomes.faa:fasta/wFol00300.fasta.out"
                     /blastp_file="uniprot_all.fasta:blastp/wFol00300.out"
     gene            complement(487785..488957)
                     /locus_tag="wFol_04030"
     CDS             complement(487785..488957)
                     /locus_tag="wFol_04030"
                     /product="NADH-quinone oxidoreductase subunit D"
                     /note="Uniprot:B6Y910"
                     /gene="nuoD"
                     /fasta_file="/home/lisa/Wolbachia_genomes/Genome_seqs/9_wol_genomes.faa:fasta/wFol00290.fasta.out"
                     /blastp_file="uniprot_all.fasta:blastp/wFol00290.out"
     gene            489087..489704
                     /locus_tag="wFol_04040"
     CDS             489087..489704
                     /locus_tag="wFol_04040"
                     /product="Putative membrane protein"
                     /note="Uniprot:H0U2L8"
                     /fasta_file="/home/lisa/Wolbachia_genomes/Genome_seqs/9_wol_genomes.faa:fasta/wFol00280.fasta.out"
                     /blastp_file="uniprot_all.fasta:blastp/wFol00280.out"
     gene            489949..490431
                     /locus_tag="wFol_04050"
     CDS             489949..490431
                     /locus_tag="wFol_04050"
                     /product="Putative membrane protein"
                     /note="Uniprot:H0U2L8"
                     /fasta_file="/home/lisa/Wolbachia_genomes/Genome_seqs/9_wol_genomes.faa:fasta/wFol00270.fasta.out"
                     /blastp_file="uniprot_all.fasta:blastp/wFol00270.out"
     gene            complement(490448..491152)
                     /locus_tag="wFol_04060"
     CDS             complement(490448..491152)
                     /locus_tag="wFol_04060"
                     /product="Uncharacterized protein"
                     /note="Uniprot:A0A0P6P238"
                     /fasta_file="/home/lisa/Wolbachia_genomes/Genome_seqs/9_wol_genomes.faa:fasta/wFol00260.fasta.out"
                     /blastp_file="uniprot_all.fasta:blastp/wFol00260.out"
     gene            491429..492736
                     /locus_tag="wFol_04070"
     CDS             491429..492736
                     /locus_tag="wFol_04070"
                     /product="Adenylosuccinate synthetase"
                     /note="Uniprot:M9WZJ2"
                     /gene="purA"
                     /fasta_file="/home/lisa/Wolbachia_genomes/Genome_seqs/9_wol_genomes.faa:fasta/wFol00250.fasta.out"
                     /blastp_file="uniprot_all.fasta:blastp/wFol00250.out"
     gene            492998..495901
                     /locus_tag="wFol_04080"
     CDS             492998..495901
                     /locus_tag="wFol_04080"
                     /product="Uncharacterized protein"
                     /note="Uniprot:A0A0P6NNG4"
                     /fasta_file="/home/lisa/Wolbachia_genomes/Genome_seqs/9_wol_genomes.faa:fasta/wFol00240.fasta.out"
                     /blastp_file="uniprot_all.fasta:blastp/wFol00240.out"
     gene            complement(495996..502676)
                     /locus_tag="wFol_04090"
     CDS             complement(495996..502676)
                     /locus_tag="wFol_04090"
                     /product="Tropomyosin family protein"
                     /fasta_file="/home/lisa/Wolbachia_genomes/Genome_seqs/9_wol_genomes.faa:fasta/wFol00230.fasta.out"
                     /blastp_file="uniprot_all.fasta:blastp/wFol00230.out"
     gene            502917..503456
                     /locus_tag="wFol_04100"
     CDS             502917..503456
                     /locus_tag="wFol_04100"
                     /product="2-nonaprenyl-3-methyl-6-methoxy-1,4-benzoquinol
                     hydroxylase"
                     /note="Uniprot:A0A0P6NQD2"
                     /gene="coq7"
                     /fasta_file="/home/lisa/Wolbachia_genomes/Genome_seqs/9_wol_genomes.faa:fasta/wFol00220.fasta.out"
                     /blastp_file="uniprot_all.fasta:blastp/wFol00220.out"
     gene            complement(503482..504858)
                     /locus_tag="wFol_04110"
     CDS             complement(503482..504858)
                     /locus_tag="wFol_04110"
                     /product="Response regulator PleD"
                     /note="Uniprot:C0R5J9"
                     /gene="pleD"
                     /fasta_file="/home/lisa/Wolbachia_genomes/Genome_seqs/9_wol_genomes.faa:fasta/wFol00210.fasta.out"
                     /blastp_file="uniprot_all.fasta:blastp/wFol00210.out"
     gene            complement(504830..505138)
                     /locus_tag="wFol_04120"
     CDS             complement(504830..505138)
                     /locus_tag="wFol_04120"
                     /product="Uncharacterized protein"
                     /note="Uniprot:C0R5K0"
                     /fasta_file="/home/lisa/Wolbachia_genomes/Genome_seqs/9_wol_genomes.faa:fasta/wFol00200.fasta.out"
                     /blastp_file="uniprot_all.fasta:blastp/wFol00200.out"
     gene            complement(505143..509852)
                     /locus_tag="wFol_04130"
     CDS             complement(505143..509852)
                     /locus_tag="wFol_04130"
                     /product="NAD-glutamate dehydrogenase"
                     /note="Uniprot:A0A178GV25"
                     /fasta_file="/home/lisa/Wolbachia_genomes/Genome_seqs/9_wol_genomes.faa:fasta/wFol00190.fasta.out"
                     /blastp_file="uniprot_all.fasta:blastp/wFol00190.out"
     gene            complement(510028..511296)
                     /locus_tag="wFol_04140"
     CDS             complement(510028..511296)
                     /locus_tag="wFol_04140"
                     /product="Ankyrin repeat domain protein"
                     /fasta_file="/home/lisa/Wolbachia_genomes/Genome_seqs/9_wol_genomes.faa:fasta/wFol00180.fasta.out"
                     /blastp_file="uniprot_all.fasta:blastp/wFol00180.out"
     gene            511539..512477
                     /locus_tag="wFol_04150"
     CDS             511539..512477
                     /locus_tag="wFol_04150"
                     /product="Putative membrane protein"
                     /note="Uniprot:A0A098AS17"
                     /fasta_file="/home/lisa/Wolbachia_genomes/Genome_seqs/9_wol_genomes.faa:fasta/wFol00170.fasta.out"
                     /blastp_file="uniprot_all.fasta:blastp/wFol00170.out"
     gene            512553..512912
                     /locus_tag="wFol_04160"
     CDS             512553..512912
                     /locus_tag="wFol_04160"
                     /product="Transposase, IS630 family, ORFA"
                     /note="no group"
                     /note="Uniprot:A0A176Q7X1"
                     /fasta_file="/home/lisa/Wolbachia_genomes/Genome_seqs/9_wol_genomes.faa:fasta/wFol00160.fasta.out"
                     /blastp_file="uniprot_all.fasta:blastp/wFol00160.out"
     gene            513040..513333
                     /locus_tag="wFol_04170"
     CDS             513040..513333
                     /locus_tag="wFol_04170"
                     /product="Transposase, IS630 family, ORFB"
                     /note="Uniprot:A0A178GWK9"
                     /fasta_file="/home/lisa/Wolbachia_genomes/Genome_seqs/9_wol_genomes.faa:fasta/wFol00150.fasta.out"
                     /blastp_file="uniprot_all.fasta:blastp/wFol00150.out"
     gene            complement(513324..514781)
                     /locus_tag="wFol_04180"
     CDS             complement(513324..514781)
                     /locus_tag="wFol_04180"
                     /product="Transposase, IS4 family"
                     /note="group IS50"
                     /note="Uniprot:A0A178GTG4"
                     /fasta_file="/home/lisa/Wolbachia_genomes/Genome_seqs/9_wol_genomes.faa:fasta/wFol00140.fasta.out"
                     /blastp_file="uniprot_all.fasta:blastp/wFol00140.out"
     gene            complement(515073..515630)
                     /locus_tag="wFol_04190"
     CDS             complement(515073..515630)
                     /locus_tag="wFol_04190"
                     /product="Deoxycytidine triphosphate deaminase"
                     /note="Uniprot:M9X043"
                     /gene="dcd"
                     /fasta_file="/home/lisa/Wolbachia_genomes/Genome_seqs/9_wol_genomes.faa:fasta/wFol00130.fasta.out"
                     /blastp_file="uniprot_all.fasta:blastp/wFol00130.out"
     gene            515783..516790
                     /locus_tag="wFol_04200"
     CDS             515783..516790
                     /locus_tag="wFol_04200"
                     /product="Putative membrane protein"
                     /fasta_file="/home/lisa/Wolbachia_genomes/Genome_seqs/9_wol_genomes.faa:fasta/wFol00120.fasta.out"
                     /blastp_file="uniprot_all.fasta:blastp/wFol00120.out"
     gene            complement(516916..517515)
                     /locus_tag="wFol_04210"
     CDS             complement(516916..517515)
                     /locus_tag="wFol_04210"
                     /product="SCO1/SenC family protein"
                     /note="Uniprot:Q73IP7"
                     /fasta_file="/home/lisa/Wolbachia_genomes/Genome_seqs/9_wol_genomes.faa:fasta/wFol00110.fasta.out"
                     /blastp_file="uniprot_all.fasta:blastp/wFol00110.out"
     gene            517685..518656
                     /locus_tag="wFol_04220"
     CDS             517685..518656
                     /locus_tag="wFol_04220"
                     /product="Transposase, IS481 family"
                     /note="no group"
                     /note="Uniprot:A0A0D7PAZ1"
                     /fasta_file="/home/lisa/Wolbachia_genomes/Genome_seqs/9_wol_genomes.faa:fasta/wFol00100.fasta.out"
                     /blastp_file="uniprot_all.fasta:blastp/wFol00100.out"
     gene            complement(518730..519689)
                     /locus_tag="wFol_04230"
     CDS             complement(518730..519689)
                     /locus_tag="wFol_04230"
                     /product="Transposase, IS5 family"
                     /note="group IS903"
                     /note="Uniprot:A0A098AQT6"
                     /fasta_file="/home/lisa/Wolbachia_genomes/Genome_seqs/9_wol_genomes.faa:fasta/wFol00090.fasta.out"
                     /blastp_file="uniprot_all.fasta:blastp/wFol00090.out"
     gene            520148..520585
                     /locus_tag="wFol_04240"
     CDS             520148..520585
                     /locus_tag="wFol_04240"
                     /product="Ribonuclease H"
                     /note="Uniprot:A0A060PYD6"
                     /gene="rnhA"
                     /fasta_file="/home/lisa/Wolbachia_genomes/Genome_seqs/9_wol_genomes.faa:fasta/wFol00080.fasta.out"
                     /blastp_file="uniprot_all.fasta:blastp/wFol00080.out"
     gene            520578..523532
                     /locus_tag="wFol_04250"
     CDS             520578..523532
                     /locus_tag="wFol_04250"
                     /product="AsmA-like domain protein"
                     /note="Uniprot:M9WUG6"
                     /fasta_file="/home/lisa/Wolbachia_genomes/Genome_seqs/9_wol_genomes.faa:fasta/wFol00070.fasta.out"
                     /blastp_file="uniprot_all.fasta:blastp/wFol00070.out"
     gene            complement(523701..524246)
                     /locus_tag="wFol_04260"
     CDS             complement(523701..524246)
                     /locus_tag="wFol_04260"
                     /product="Acetyltransferase (GNAT)"
                     /note="Uniprot:A0A178GSR7"
                     /fasta_file="/home/lisa/Wolbachia_genomes/Genome_seqs/9_wol_genomes.faa:fasta/wFol00060.fasta.out"
                     /blastp_file="uniprot_all.fasta:blastp/wFol00060.out"
     gene            complement(524415..525566)
                     /locus_tag="wFol_04270"
     CDS             complement(524415..525566)
                     /locus_tag="wFol_04270"
                     /product="Ankyrin repeat domain protein"
                     /note="Uniprot:A2FE09"
                     /fasta_file="/home/lisa/Wolbachia_genomes/Genome_seqs/9_wol_genomes.faa:fasta/wFol00050.fasta.out"
                     /blastp_file="uniprot_all.fasta:blastp/wFol00050.out"
     gene            complement(525684..526394)
                     /locus_tag="wFol_04280"
     CDS             complement(525684..526394)
                     /locus_tag="wFol_04280"
                     /product="1-acyl-sn-glycerol-3-phosphate acyltransferase
                     family protein"
                     /note="Uniprot:Q73G19"
                     /fasta_file="/home/lisa/Wolbachia_genomes/Genome_seqs/9_wol_genomes.faa:fasta/wFol00040.fasta.out"
                     /blastp_file="uniprot_all.fasta:blastp/wFol00040.out"
     gene            complement(526433..527428)
                     /locus_tag="wFol_04290"
     CDS             complement(526433..527428)
                     /locus_tag="wFol_04290"
                     /product="Site-specific recombinase, phage integrase
                     family"
                     /note="Uniprot:A0A178GT15"
                     /fasta_file="/home/lisa/Wolbachia_genomes/Genome_seqs/9_wol_genomes.faa:fasta/wFol00030.fasta.out"
                     /blastp_file="uniprot_all.fasta:blastp/wFol00030.out"
     gene            complement(527418..527588)
                     /locus_tag="wFol_04300"
     CDS             complement(527418..527588)
                     /locus_tag="wFol_04300"
                     /product="Putative membrane protein"
                     /note="Uniprot:B3CMG7"
                     /fasta_file="/home/lisa/Wolbachia_genomes/Genome_seqs/9_wol_genomes.faa:fasta/wFol00020.fasta.out"
                     /blastp_file="uniprot_all.fasta:blastp/wFol00020.out"
     gene            complement(527771..528400)
                     /locus_tag="wFol_04310"
     CDS             complement(527771..528400)
                     /locus_tag="wFol_04310"
                     /product="Chromosomal DNA replication initiator-related
                     protein"
                     /note="Uniprot:Q73G22"
                     /fasta_file="/home/lisa/Wolbachia_genomes/Genome_seqs/9_wol_genomes.faa:fasta/wFol00010.fasta.out"
                     /blastp_file="uniprot_all.fasta:blastp/wFol00010.out"
     gene            complement(528402..529475)
                     /locus_tag="wFol_04320"
     CDS             complement(528402..529475)
                     /locus_tag="wFol_04320"
                     /product="AI-2E family transporter"
                     /note="Uniprot:A0A178GS91"
                     /fasta_file="/home/lisa/Wolbachia_genomes/Genome_seqs/9_wol_genomes.faa:fasta/wFol16350.fasta.out"
                     /blastp_file="uniprot_all.fasta:blastp/wFol16350.out"
     gene            529608..531098
                     /locus_tag="wFol_04330"
     CDS             529608..531098
                     /locus_tag="wFol_04330"
                     /product="Phosphoglucomutase/phosphomannomutase family
                     protein"
                     /note="Uniprot:M9WW15"
                     /fasta_file="/home/lisa/Wolbachia_genomes/Genome_seqs/9_wol_genomes.faa:fasta/wFol16340.fasta.out"
                     /blastp_file="uniprot_all.fasta:blastp/wFol16340.out"
     gene            complement(531166..532578)
                     /locus_tag="wFol_04340"
     CDS             complement(531166..532578)
                     /locus_tag="wFol_04340"
                     /product="Uncharacterized protein"
                     /note="Uniprot:H0U100"
                     /fasta_file="/home/lisa/Wolbachia_genomes/Genome_seqs/9_wol_genomes.faa:fasta/wFol16330.fasta.out"
                     /blastp_file="uniprot_all.fasta:blastp/wFol16330.out"
     gene            532878..534707
                     /locus_tag="wFol_04350"
     CDS             532878..534707
                     /locus_tag="wFol_04350"
                     /product="GTP-binding protein TypA"
                     /note="Uniprot:Q73IE1"
                     /gene="typA"
                     /fasta_file="/home/lisa/Wolbachia_genomes/Genome_seqs/9_wol_genomes.faa:fasta/wFol16320.fasta.out"
                     /blastp_file="uniprot_all.fasta:blastp/wFol16320.out"
     gene            complement(534818..535453)
                     /locus_tag="wFol_04360"
     CDS             complement(534818..535453)
                     /locus_tag="wFol_04360"
                     /product="TENA/THI-4/PQQC family protein"
                     /note="Uniprot:A0A0W0Y1J2"
                     /fasta_file="/home/lisa/Wolbachia_genomes/Genome_seqs/9_wol_genomes.faa:fasta/wFol16310.fasta.out"
                     /blastp_file="uniprot_all.fasta:blastp/wFol16310.out"
     gene            complement(535582..536577)
                     /locus_tag="wFol_04370"
     CDS             complement(535582..536577)
                     /locus_tag="wFol_04370"
                     /product="Ribonucleoside-diphosphate reductase subunit
                     beta"
                     /note="Uniprot:Q73IF5"
                     /gene="nrdB"
                     /fasta_file="/home/lisa/Wolbachia_genomes/Genome_seqs/9_wol_genomes.faa:fasta/wFol16300.fasta.out"
                     /blastp_file="uniprot_all.fasta:blastp/wFol16300.out"
     gene            536694..537041
                     /locus_tag="wFol_04380"
     CDS             536694..537041
                     /locus_tag="wFol_04380"
                     /product="Putative outer membrane lipoprotein"
                     /note="Uniprot:H0U2A2"
                     /fasta_file="/home/lisa/Wolbachia_genomes/Genome_seqs/9_wol_genomes.faa:fasta/wFol16290.fasta.out"
                     /blastp_file="uniprot_all.fasta:blastp/wFol16290.out"
     gene            537100..538539
                     /locus_tag="wFol_04390"
     CDS             537100..538539
                     /locus_tag="wFol_04390"
                     /product="Ankyrin repeat domain protein"
                     /fasta_file="/home/lisa/Wolbachia_genomes/Genome_seqs/9_wol_genomes.faa:fasta/wFol16280.fasta.out"
                     /blastp_file="uniprot_all.fasta:blastp/wFol16280.out"
     gene            538680..539936
                     /locus_tag="wFol_04400"
     CDS             538680..539936
                     /locus_tag="wFol_04400"
                     /product="Ankyrin repeat domain protein"
                     /note="Uniprot:H2BL54"
                     /fasta_file="/home/lisa/Wolbachia_genomes/Genome_seqs/9_wol_genomes.faa:fasta/wFol16270.fasta.out"
                     /blastp_file="uniprot_all.fasta:blastp/wFol16270.out"
     gene            540331..541389
                     /locus_tag="wFol_04410"
     CDS             540331..541389
                     /locus_tag="wFol_04410"
                     /product="Ankyrin repeat domain protein"
                     /fasta_file="/home/lisa/Wolbachia_genomes/Genome_seqs/9_wol_genomes.faa:fasta/wFol16260.fasta.out"
                     /blastp_file="uniprot_all.fasta:blastp/wFol16260.out"
     gene            541610..542482
                     /locus_tag="wFol_04420"
     CDS             541610..542482
                     /locus_tag="wFol_04420"
                     /product="ATP synthase subunit gamma"
                     /note="Uniprot:A0A178GU42"
                     /gene="atpG"
                     /fasta_file="/home/lisa/Wolbachia_genomes/Genome_seqs/9_wol_genomes.faa:fasta/wFol16250.fasta.out"
                     /blastp_file="uniprot_all.fasta:blastp/wFol16250.out"
     gene            542501..543835
                     /locus_tag="wFol_04430"
     CDS             542501..543835
                     /locus_tag="wFol_04430"
                     /product="Putative modulator of DNA gyrase"
                     /note="Uniprot:A0A098ATQ2"
                     /gene="pmbA"
                     /fasta_file="/home/lisa/Wolbachia_genomes/Genome_seqs/9_wol_genomes.faa:fasta/wFol16240.fasta.out"
                     /blastp_file="uniprot_all.fasta:blastp/wFol16240.out"
     gene            544008..544259
                     /locus_tag="wFol_04440"
     CDS             544008..544259
                     /locus_tag="wFol_04440"
                     /product="Cold-shock DNA-binding domain protein"
                     /note="Uniprot:A0A178GVF6"
                     /fasta_file="/home/lisa/Wolbachia_genomes/Genome_seqs/9_wol_genomes.faa:fasta/wFol16230.fasta.out"
                     /blastp_file="uniprot_all.fasta:blastp/wFol16230.out"
     gene            544295..545530
                     /locus_tag="wFol_04450"
     CDS             544295..545530
                     /locus_tag="wFol_04450"
                     /product="ATP-dependent RNA helicase, DeaD/DeaH box
                     family"
                     /note="Uniprot:M9WXP8"
                     /fasta_file="/home/lisa/Wolbachia_genomes/Genome_seqs/9_wol_genomes.faa:fasta/wFol16220.fasta.out"
                     /blastp_file="uniprot_all.fasta:blastp/wFol16220.out"
     gene            complement(545654..546700)
                     /locus_tag="wFol_04460"
     CDS             complement(545654..546700)
                     /locus_tag="wFol_04460"
                     /product="Putative S-adenosyl-L-methionine-dependent
                     methyltransferase"
                     /note="Uniprot:M9WSD1"
                     /fasta_file="/home/lisa/Wolbachia_genomes/Genome_seqs/9_wol_genomes.faa:fasta/wFol16210.fasta.out"
                     /blastp_file="uniprot_all.fasta:blastp/wFol16210.out"
     gene            546781..547173
                     /locus_tag="wFol_04470"
     CDS             546781..547173
                     /locus_tag="wFol_04470"
                     /product="Uncharacterized protein"
                     /note="Uniprot:Q73H57"
                     /fasta_file="/home/lisa/Wolbachia_genomes/Genome_seqs/9_wol_genomes.faa:fasta/wFol16200.fasta.out"
                     /blastp_file="uniprot_all.fasta:blastp/wFol16200.out"
     gene            547173..547469
                     /locus_tag="wFol_04480"
     CDS             547173..547469
                     /locus_tag="wFol_04480"
                     /product="Uncharacterized protein"
                     /note="Uniprot:Q73H58"
                     /fasta_file="/home/lisa/Wolbachia_genomes/Genome_seqs/9_wol_genomes.faa:fasta/wFol16190.fasta.out"
                     /blastp_file="uniprot_all.fasta:blastp/wFol16190.out"
     gene            547614..548822
                     /locus_tag="wFol_04490"
     CDS             547614..548822
                     /locus_tag="wFol_04490"
                     /product="DnaJ and ankyrin repeat domain protein"
                     /note="Uniprot:B3CNN3"
                     /fasta_file="/home/lisa/Wolbachia_genomes/Genome_seqs/9_wol_genomes.faa:fasta/wFol16180.fasta.out"
                     /blastp_file="uniprot_all.fasta:blastp/wFol16180.out"
     gene            548923..550092
                     /locus_tag="wFol_04500"
     CDS             548923..550092
                     /locus_tag="wFol_04500"
                     /product="DnaJ and ankyrin repeat domain protein"
                     /note="Uniprot:A0A067MKW1"
                     /fasta_file="/home/lisa/Wolbachia_genomes/Genome_seqs/9_wol_genomes.faa:fasta/wFol16170.fasta.out"
                     /blastp_file="uniprot_all.fasta:blastp/wFol16170.out"
     gene            550170..552848
                     /locus_tag="wFol_04510"
     CDS             550170..552848
                     /locus_tag="wFol_04510"
                     /product="2-oxoglutarate dehydrogenase E1 component"
                     /note="Uniprot:M9X1V4"
                     /gene="sucA"
                     /fasta_file="/home/lisa/Wolbachia_genomes/Genome_seqs/9_wol_genomes.faa:fasta/wFol16160.fasta.out"
                     /blastp_file="uniprot_all.fasta:blastp/wFol16160.out"
     gene            552860..554095
                     /locus_tag="wFol_04520"
     CDS             552860..554095
                     /locus_tag="wFol_04520"
                     /product="2-methylthioadenine synthetase"
                     /note="Uniprot:Q5GTI1"
                     /fasta_file="/home/lisa/Wolbachia_genomes/Genome_seqs/9_wol_genomes.faa:fasta/wFol16150.fasta.out"
                     /blastp_file="uniprot_all.fasta:blastp/wFol16150.out"
     gene            554160..555227
                     /locus_tag="wFol_04530"
     CDS             554160..555227
                     /locus_tag="wFol_04530"
                     /product="Putative outer membrane protein"
                     /note="Uniprot:A0A0P6NQT9"
                     /fasta_file="/home/lisa/Wolbachia_genomes/Genome_seqs/9_wol_genomes.faa:fasta/wFol16140.fasta.out"
                     /blastp_file="uniprot_all.fasta:blastp/wFol16140.out"
     gene            complement(555352..556224)
                     /locus_tag="wFol_04540"
     CDS             complement(555352..556224)
                     /locus_tag="wFol_04540"
                     /product="Succinate--CoA ligase [ADP-forming] subunit
                     alpha"
                     /note="Uniprot:C0F9X2"
                     /gene="sucD"
                     /fasta_file="/home/lisa/Wolbachia_genomes/Genome_seqs/9_wol_genomes.faa:fasta/wFol16130.fasta.out"
                     /blastp_file="uniprot_all.fasta:blastp/wFol16130.out"
     gene            complement(556228..557388)
                     /locus_tag="wFol_04550"
     CDS             complement(556228..557388)
                     /locus_tag="wFol_04550"
                     /product="Succinate--CoA ligase [ADP-forming] subunit
                     beta"
                     /note="Uniprot:B6Y6Q5"
                     /gene="sucC"
                     /fasta_file="/home/lisa/Wolbachia_genomes/Genome_seqs/9_wol_genomes.faa:fasta/wFol16120.fasta.out"
                     /blastp_file="uniprot_all.fasta:blastp/wFol16120.out"
     gene            complement(557419..557619)
                     /locus_tag="wFol_04560"
     CDS             complement(557419..557619)
                     /locus_tag="wFol_04560"
                     /product="30S ribosomal protein S21"
                     /note="Uniprot:U5EU67"
                     /gene="rpsU"
                     /fasta_file="/home/lisa/Wolbachia_genomes/Genome_seqs/9_wol_genomes.faa:fasta/wFol16110.fasta.out"
                     /blastp_file="uniprot_all.fasta:blastp/wFol16110.out"
     tRNA            complement(557759..557832)
                     /ID="tRNA:Pro"
                     /Codon="TGG"
                     /score=79.66
                     /Name="tRNA:Pro"
                     /AminoAcid="Pro"
     gene            complement(557884..560274)
                     /locus_tag="wFol_04570"
     CDS             complement(557884..560274)
                     /locus_tag="wFol_04570"
                     /product="Uncharacterized protein"
                     /note="Uniprot:A0A0P6NRB0"
                     /fasta_file="/home/lisa/Wolbachia_genomes/Genome_seqs/9_wol_genomes.faa:fasta/wFol16100.fasta.out"
                     /blastp_file="uniprot_all.fasta:blastp/wFol16100.out"
     gene            complement(560505..561353)
                     /locus_tag="wFol_04580"
     CDS             complement(560505..561353)
                     /locus_tag="wFol_04580"
                     /product="Uncharacterized protein"
                     /note="Uniprot:B3CM79"
                     /fasta_file="/home/lisa/Wolbachia_genomes/Genome_seqs/9_wol_genomes.faa:fasta/wFol16090.fasta.out"
                     /blastp_file="uniprot_all.fasta:blastp/wFol16090.out"
     gene            561488..562816
                     /locus_tag="wFol_04590"
     CDS             561488..562816
                     /locus_tag="wFol_04590"
                     /product="GTPase Der"
                     /note="Uniprot:B3CM80"
                     /gene="der"
                     /fasta_file="/home/lisa/Wolbachia_genomes/Genome_seqs/9_wol_genomes.faa:fasta/wFol16080.fasta.out"
                     /blastp_file="uniprot_all.fasta:blastp/wFol16080.out"
     gene            562897..563868
                     /locus_tag="wFol_04600"
     CDS             562897..563868
                     /locus_tag="wFol_04600"
                     /product="Transposase, IS481 family"
                     /note="no group"
                     /note="Uniprot:A0A0D7PAZ1"
                     /fasta_file="/home/lisa/Wolbachia_genomes/Genome_seqs/9_wol_genomes.faa:fasta/wFol16070.fasta.out"
                     /blastp_file="uniprot_all.fasta:blastp/wFol16070.out"
     gene            complement(563940..564758)
                     /locus_tag="wFol_04610"
     CDS             complement(563940..564758)
                     /locus_tag="wFol_04610"
                     /product="Putative membrane protein"
                     /fasta_file="/home/lisa/Wolbachia_genomes/Genome_seqs/9_wol_genomes.faa:fasta/wFol16060.fasta.out"
                     /blastp_file="uniprot_all.fasta:blastp/wFol16060.out"
     gene            complement(564778..565272)
                     /locus_tag="wFol_04620"
     CDS             complement(564778..565272)
                     /locus_tag="wFol_04620"
                     /product="Putative membrane protein"
                     /fasta_file="/home/lisa/Wolbachia_genomes/Genome_seqs/9_wol_genomes.faa:fasta/wFol16050.fasta.out"
                     /blastp_file="uniprot_all.fasta:blastp/wFol16050.out"
     gene            565428..566774
                     /locus_tag="wFol_04630"
     CDS             565428..566774
                     /locus_tag="wFol_04630"
                     /product="Dihydroorotase"
                     /note="Uniprot:C0F9H2"
                     /gene="pyrC"
                     /fasta_file="/home/lisa/Wolbachia_genomes/Genome_seqs/9_wol_genomes.faa:fasta/wFol16040.fasta.out"
                     /blastp_file="uniprot_all.fasta:blastp/wFol16040.out"
     gene            566898..568937
                     /locus_tag="wFol_04640"
     CDS             566898..568937
                     /locus_tag="wFol_04640"
                     /product="tRNA uridine 5-carboxymethylaminomethyl
                     modification enzyme MnmG"
                     /note="Uniprot:H0U335"
                     /gene="mnmG"
                     /fasta_file="/home/lisa/Wolbachia_genomes/Genome_seqs/9_wol_genomes.faa:fasta/wFol16030.fasta.out"
                     /blastp_file="uniprot_all.fasta:blastp/wFol16030.out"
     gene            complement(568930..569622)
                     /locus_tag="wFol_04650"
     CDS             complement(568930..569622)
                     /locus_tag="wFol_04650"
                     /product="Inositol monophosphatase family protein"
                     /note="Uniprot:A0A098ASW6"
                     /fasta_file="/home/lisa/Wolbachia_genomes/Genome_seqs/9_wol_genomes.faa:fasta/wFol16020.fasta.out"
                     /blastp_file="uniprot_all.fasta:blastp/wFol16020.out"
     gene            complement(569632..570198)
                     /locus_tag="wFol_04660"
     CDS             complement(569632..570198)
                     /locus_tag="wFol_04660"
                     /product="Elongation factor P"
                     /note="Uniprot:M9WX89"
                     /gene="efp"
                     /fasta_file="/home/lisa/Wolbachia_genomes/Genome_seqs/9_wol_genomes.faa:fasta/wFol16010.fasta.out"
                     /blastp_file="uniprot_all.fasta:blastp/wFol16010.out"
     gene            570503..571501
                     /locus_tag="wFol_04670"
     CDS             570503..571501
                     /locus_tag="wFol_04670"
                     /product="Ankyrin repeat domain protein"
                     /fasta_file="/home/lisa/Wolbachia_genomes/Genome_seqs/9_wol_genomes.faa:fasta/wFol16000.fasta.out"
                     /blastp_file="uniprot_all.fasta:blastp/wFol16000.out"
     gene            complement(571543..574326)
                     /locus_tag="wFol_04680"
     CDS             complement(571543..574326)
                     /locus_tag="wFol_04680"
                     /product="Ankyrin repeat domain protein"
                     /fasta_file="/home/lisa/Wolbachia_genomes/Genome_seqs/9_wol_genomes.faa:fasta/wFol15990.fasta.out"
                     /blastp_file="uniprot_all.fasta:blastp/wFol15990.out"
     gene            574682..575938
                     /locus_tag="wFol_04690"
     CDS             574682..575938
                     /locus_tag="wFol_04690"
                     /product="Cysteine desulfurase IscS"
                     /note="Uniprot:H0U2F3"
                     /gene="iscS"
                     /fasta_file="/home/lisa/Wolbachia_genomes/Genome_seqs/9_wol_genomes.faa:fasta/wFol15980.fasta.out"
                     /blastp_file="uniprot_all.fasta:blastp/wFol15980.out"
     gene            576003..576878
                     /locus_tag="wFol_04700"
     CDS             576003..576878
                     /locus_tag="wFol_04700"
                     /product="Putative membrane protein"
                     /fasta_file="/home/lisa/Wolbachia_genomes/Genome_seqs/9_wol_genomes.faa:fasta/wFol15970.fasta.out"
                     /blastp_file="uniprot_all.fasta:blastp/wFol15970.out"
     gene            complement(577062..577457)
                     /locus_tag="wFol_04710"
     CDS             complement(577062..577457)
                     /locus_tag="wFol_04710"
                     /product="Unique protein"
                     /fasta_file="/home/lisa/Wolbachia_genomes/Genome_seqs/9_wol_genomes.faa:fasta/wFol15960.fasta.out"
                     /blastp_file="uniprot_all.fasta:blastp/wFol15960.out"
     gene            577707..579029
                     /locus_tag="wFol_04720"
     CDS             577707..579029
                     /locus_tag="wFol_04720"
                     /product="Glutamate--tRNA ligase"
                     /note="Uniprot:A0A178GTJ5"
                     /gene="gltX"
                     /fasta_file="/home/lisa/Wolbachia_genomes/Genome_seqs/9_wol_genomes.faa:fasta/wFol15950.fasta.out"
                     /blastp_file="uniprot_all.fasta:blastp/wFol15950.out"
     gene            complement(579068..580225)
                     /locus_tag="wFol_04730"
     CDS             complement(579068..580225)
                     /locus_tag="wFol_04730"
                     /product="Radical SAM superfamily protein"
                     /fasta_file="/home/lisa/Wolbachia_genomes/Genome_seqs/9_wol_genomes.faa:fasta/wFol15940.fasta.out"
                     /blastp_file="uniprot_all.fasta:blastp/wFol15940.out"
     gene            complement(580292..580555)
                     /locus_tag="wFol_04740"
     CDS             complement(580292..580555)
                     /locus_tag="wFol_04740"
                     /product="Uncharacterized protein"
                     /note="Uniprot:H0U2M7"
                     /fasta_file="/home/lisa/Wolbachia_genomes/Genome_seqs/9_wol_genomes.faa:fasta/wFol15930.fasta.out"
                     /blastp_file="uniprot_all.fasta:blastp/wFol15930.out"
     gene            complement(580607..580882)
                     /locus_tag="wFol_04750"
     CDS             complement(580607..580882)
                     /locus_tag="wFol_04750"
                     /product="Uncharacterized protein"
                     /note="Uniprot:H0U2M7"
                     /fasta_file="/home/lisa/Wolbachia_genomes/Genome_seqs/9_wol_genomes.faa:fasta/wFol15920.fasta.out"
                     /blastp_file="uniprot_all.fasta:blastp/wFol15920.out"
     gene            581274..582863
                     /locus_tag="wFol_04760"
     CDS             581274..582863
                     /locus_tag="wFol_04760"
                     /product="Transcription termination/antitermination
                     protein NusA"
                     /note="Uniprot:C0F9S8"
                     /gene="nusA"
                     /fasta_file="/home/lisa/Wolbachia_genomes/Genome_seqs/9_wol_genomes.faa:fasta/wFol15910.fasta.out"
                     /blastp_file="uniprot_all.fasta:blastp/wFol15910.out"
     gene            582874..585186
                     /locus_tag="wFol_04770"
     CDS             582874..585186
                     /locus_tag="wFol_04770"
                     /product="Translation initiation factor IF-2"
                     /note="Uniprot:M9WTM2"
                     /gene="infB"
                     /fasta_file="/home/lisa/Wolbachia_genomes/Genome_seqs/9_wol_genomes.faa:fasta/wFol15900.fasta.out"
                     /blastp_file="uniprot_all.fasta:blastp/wFol15900.out"
     gene            585186..585617
                     /locus_tag="wFol_04780"
     CDS             585186..585617
                     /locus_tag="wFol_04780"
                     /product="Ribosomal-binding protein A"
                     /note="Uniprot:A0A178GTD5"
                     /fasta_file="/home/lisa/Wolbachia_genomes/Genome_seqs/9_wol_genomes.faa:fasta/wFol15890.fasta.out"
                     /blastp_file="uniprot_all.fasta:blastp/wFol15890.out"
     gene            585624..586481
                     /locus_tag="wFol_04790"
     CDS             585624..586481
                     /locus_tag="wFol_04790"
                     /product="4-hydroxybenzoate octaprenyltransferase"
                     /note="Uniprot:Q5GSA1"
                     /gene="ubiA"
                     /fasta_file="/home/lisa/Wolbachia_genomes/Genome_seqs/9_wol_genomes.faa:fasta/wFol15880.fasta.out"
                     /blastp_file="uniprot_all.fasta:blastp/wFol15880.out"
     gene            586509..588338
                     /locus_tag="wFol_04800"
     CDS             586509..588338
                     /locus_tag="wFol_04800"
                     /product="ABC transporter, permease/ATP-binding protein"
                     /note="Uniprot:A0A0K8MEF2"
                     /fasta_file="/home/lisa/Wolbachia_genomes/Genome_seqs/9_wol_genomes.faa:fasta/wFol15870.fasta.out"
                     /blastp_file="uniprot_all.fasta:blastp/wFol15870.out"
     gene            complement(588335..589267)
                     /locus_tag="wFol_04810"
     CDS             complement(588335..589267)
                     /locus_tag="wFol_04810"
                     /product="Ankyrin repeat domain protein"
                     /note="Uniprot:Q16FI9"
                     /fasta_file="/home/lisa/Wolbachia_genomes/Genome_seqs/9_wol_genomes.faa:fasta/wFol15860.fasta.out"
                     /blastp_file="uniprot_all.fasta:blastp/wFol15860.out"
     gene            complement(589420..590121)
                     /locus_tag="wFol_04820"
     CDS             complement(589420..590121)
                     /locus_tag="wFol_04820"
                     /product="Triosephosphate isomerase"
                     /note="Uniprot:A0A178GSL9"
                     /gene="tpiA"
                     /fasta_file="/home/lisa/Wolbachia_genomes/Genome_seqs/9_wol_genomes.faa:fasta/wFol15850.fasta.out"
                     /blastp_file="uniprot_all.fasta:blastp/wFol15850.out"
     tRNA            complement(590147..590219)
                     /ID="tRNA:Thr-2"
                     /Codon="TGT"
                     /score=83.00
                     /Name="tRNA:Thr-2"
                     /AminoAcid="Thr-2"
     gene            complement(590368..591174)
                     /locus_tag="wFol_04830"
     CDS             complement(590368..591174)
                     /locus_tag="wFol_04830"
                     /product="Putative membrane protein"
                     /note="Uniprot:Q73H04"
                     /fasta_file="/home/lisa/Wolbachia_genomes/Genome_seqs/9_wol_genomes.faa:fasta/wFol15840.fasta.out"
                     /blastp_file="uniprot_all.fasta:blastp/wFol15840.out"
     gene            complement(591176..591784)
                     /locus_tag="wFol_04840"
     CDS             complement(591176..591784)
                     /locus_tag="wFol_04840"
                     /product="Putative membrane protein"
                     /note="Uniprot:A0A0N8FER5"
                     /fasta_file="/home/lisa/Wolbachia_genomes/Genome_seqs/9_wol_genomes.faa:fasta/wFol15830.fasta.out"
                     /blastp_file="uniprot_all.fasta:blastp/wFol15830.out"
     gene            complement(591789..593228)
                     /locus_tag="wFol_04850"
     CDS             complement(591789..593228)
                     /locus_tag="wFol_04850"
                     /product="Putative membrane protein"
                     /note="Uniprot:M9WSG1"
                     /fasta_file="/home/lisa/Wolbachia_genomes/Genome_seqs/9_wol_genomes.faa:fasta/wFol15820.fasta.out"
                     /blastp_file="uniprot_all.fasta:blastp/wFol15820.out"
     gene            593494..595947
                     /locus_tag="wFol_04860"
     CDS             593494..595947
                     /locus_tag="wFol_04860"
                     /product="WH2 domain protein"
                     /fasta_file="/home/lisa/Wolbachia_genomes/Genome_seqs/9_wol_genomes.faa:fasta/wFol15810.fasta.out"
                     /blastp_file="uniprot_all.fasta:blastp/wFol15810.out"
     gene            596046..597323
                     /locus_tag="wFol_04870"
     CDS             596046..597323
                     /locus_tag="wFol_04870"
                     /product="Proline--tRNA ligase"
                     /note="Uniprot:A0A178GUT9"
                     /gene="proS"
                     /fasta_file="/home/lisa/Wolbachia_genomes/Genome_seqs/9_wol_genomes.faa:fasta/wFol15800.fasta.out"
                     /blastp_file="uniprot_all.fasta:blastp/wFol15800.out"
     gene            597320..597841
                     /locus_tag="wFol_04880"
     CDS             597320..597841
                     /locus_tag="wFol_04880"
                     /product="Holo-[acyl-carrier-protein] synthase"
                     /note="Uniprot:H0U281"
                     /gene="acpS"
                     /fasta_file="/home/lisa/Wolbachia_genomes/Genome_seqs/9_wol_genomes.faa:fasta/wFol15790.fasta.out"
                     /blastp_file="uniprot_all.fasta:blastp/wFol15790.out"
     gene            complement(597858..598631)
                     /locus_tag="wFol_04890"
     CDS             complement(597858..598631)
                     /locus_tag="wFol_04890"
                     /product="ABC transporter, ATP-binding protein"
                     /note="Uniprot:A0A098AR97"
                     /fasta_file="/home/lisa/Wolbachia_genomes/Genome_seqs/9_wol_genomes.faa:fasta/wFol15780.fasta.out"
                     /blastp_file="uniprot_all.fasta:blastp/wFol15780.out"
     gene            complement(598777..600498)
                     /locus_tag="wFol_04900"
     CDS             complement(598777..600498)
                     /locus_tag="wFol_04900"
                     /product="ABC transporter, permease/ATP-binding protein"
                     /note="Uniprot:A0A178GUG3"
                     /fasta_file="/home/lisa/Wolbachia_genomes/Genome_seqs/9_wol_genomes.faa:fasta/wFol15770.fasta.out"
                     /blastp_file="uniprot_all.fasta:blastp/wFol15770.out"
     gene            complement(600534..601412)
                     /locus_tag="wFol_04910"
     CDS             complement(600534..601412)
                     /locus_tag="wFol_04910"
                     /product="Putative membrane protein"
                     /fasta_file="/home/lisa/Wolbachia_genomes/Genome_seqs/9_wol_genomes.faa:fasta/wFol15760.fasta.out"
                     /blastp_file="uniprot_all.fasta:blastp/wFol15760.out"
     gene            complement(601645..602403)
                     /locus_tag="wFol_04920"
     CDS             complement(601645..602403)
                     /locus_tag="wFol_04920"
                     /product="Alpha/beta hydrolase fold superfamily protein"
                     /note="Uniprot:A0A0F3MBM3"
                     /fasta_file="/home/lisa/Wolbachia_genomes/Genome_seqs/9_wol_genomes.faa:fasta/wFol15750.fasta.out"
                     /blastp_file="uniprot_all.fasta:blastp/wFol15750.out"
     gene            complement(602554..604659)
                     /locus_tag="wFol_04930"
     CDS             complement(602554..604659)
                     /locus_tag="wFol_04930"
                     /product="Putative membrane protein"
                     /note="Uniprot:A0A0P6P2I8"
                     /fasta_file="/home/lisa/Wolbachia_genomes/Genome_seqs/9_wol_genomes.faa:fasta/wFol15740.fasta.out"
                     /blastp_file="uniprot_all.fasta:blastp/wFol15740.out"
     gene            604820..605953
                     /locus_tag="wFol_04940"
     CDS             604820..605953
                     /locus_tag="wFol_04940"
                     /product="Sodium:dicarboxylate symporter family protein"
                     /note="Uniprot:A0A178GTP3"
                     /fasta_file="/home/lisa/Wolbachia_genomes/Genome_seqs/9_wol_genomes.faa:fasta/wFol15730.fasta.out"
                     /blastp_file="uniprot_all.fasta:blastp/wFol15730.out"
     gene            605953..606579
                     /locus_tag="wFol_04950"
     CDS             605953..606579
                     /locus_tag="wFol_04950"
                     /product="Putative glycoprotease"
                     /note="Uniprot:A0A176Q5K4"
                     /fasta_file="/home/lisa/Wolbachia_genomes/Genome_seqs/9_wol_genomes.faa:fasta/wFol15720.fasta.out"
                     /blastp_file="uniprot_all.fasta:blastp/wFol15720.out"
     gene            607296..608570
                     /locus_tag="wFol_04960"
     CDS             607296..608570
                     /locus_tag="wFol_04960"
                     /product="Enolase"
                     /note="Uniprot:C0FAE9"
                     /gene="eno"
                     /fasta_file="/home/lisa/Wolbachia_genomes/Genome_seqs/9_wol_genomes.faa:fasta/wFol15700.fasta.out"
                     /blastp_file="uniprot_all.fasta:blastp/wFol15700.out"
     gene            608558..609580
                     /locus_tag="wFol_04970"
     CDS             608558..609580
                     /locus_tag="wFol_04970"
                     /product="GTPase Obg"
                     /note="Uniprot:A0A060Q057"
                     /gene="obg"
                     /fasta_file="/home/lisa/Wolbachia_genomes/Genome_seqs/9_wol_genomes.faa:fasta/wFol15690.fasta.out"
                     /blastp_file="uniprot_all.fasta:blastp/wFol15690.out"
     gene            complement(609708..610831)
                     /locus_tag="wFol_04980"
                     /note="Transposase, IS4 family, contains frameshift
                     mutation"
                     /note="group IS4Sa"
                     /note="Uniprot:A0A0P6NQA5"
                     /fasta_file="/home/lisa/Wolbachia_genomes/Genome_seqs/9_wol_genomes.faa:fasta/wFol15670.fasta.out"
                     /fasta_file="/home/lisa/Wolbachia_genomes/Genome_seqs/9_wol_genomes.faa:fasta/wFol15680.fasta.out"
                     /blastp_file="uniprot_all.fasta:blastp/wFol15670.out"
                     /blastp_file="uniprot_all.fasta:blastp/wFol15680.out"
                     /pseudo
     gene            611015..611368
                     /locus_tag="wFol_04990"
     CDS             611015..611368
                     /locus_tag="wFol_04990"
                     /product="Unique protein"
                     /fasta_file="/home/lisa/Wolbachia_genomes/Genome_seqs/9_wol_genomes.faa:fasta/wFol15660.fasta.out"
                     /blastp_file="uniprot_all.fasta:blastp/wFol15660.out"
     gene            611435..611728
                     /locus_tag="wFol_05000"
     CDS             611435..611728
                     /locus_tag="wFol_05000"
                     /product="Uncharacterized protein"
                     /note="Uniprot:C0F8H2"
                     /fasta_file="/home/lisa/Wolbachia_genomes/Genome_seqs/9_wol_genomes.faa:fasta/wFol15650.fasta.out"
                     /blastp_file="uniprot_all.fasta:blastp/wFol15650.out"
     gene            611842..614214
                     /locus_tag="wFol_05010"
     CDS             611842..614214
                     /locus_tag="wFol_05010"
                     /product="Phenylalanine--tRNA ligase beta subunit"
                     /note="Uniprot:A0A060PY67"
                     /gene="pheT"
                     /fasta_file="/home/lisa/Wolbachia_genomes/Genome_seqs/9_wol_genomes.faa:fasta/wFol15640.fasta.out"
                     /blastp_file="uniprot_all.fasta:blastp/wFol15640.out"
     gene            614357..614872
                     /locus_tag="wFol_05020"
     CDS             614357..614872
                     /locus_tag="wFol_05020"
                     /product="RDD family protein"
                     /note="Uniprot:C0F9R0"
                     /fasta_file="/home/lisa/Wolbachia_genomes/Genome_seqs/9_wol_genomes.faa:fasta/wFol15630.fasta.out"
                     /blastp_file="uniprot_all.fasta:blastp/wFol15630.out"
     gene            615056..618346
                     /locus_tag="wFol_05030"
     CDS             615056..618346
                     /locus_tag="wFol_05030"
                     /product="Ankyrin repeat domain protein"
                     /note="Uniprot:B3EU24"
                     /fasta_file="/home/lisa/Wolbachia_genomes/Genome_seqs/9_wol_genomes.faa:fasta/wFol15620.fasta.out"
                     /blastp_file="uniprot_all.fasta:blastp/wFol15620.out"
     gene            complement(618563..619222)
                     /locus_tag="wFol_05040"
     CDS             complement(618563..619222)
                     /locus_tag="wFol_05040"
                     /product="Putative type IV secretion system protein VirB8"
                     /note="Uniprot:A0A059IWF6"
                     /fasta_file="/home/lisa/Wolbachia_genomes/Genome_seqs/9_wol_genomes.faa:fasta/wFol15610.fasta.out"
                     /blastp_file="uniprot_all.fasta:blastp/wFol15610.out"
     gene            complement(619288..620073)
                     /locus_tag="wFol_05050"
     CDS             complement(619288..620073)
                     /locus_tag="wFol_05050"
                     /product="Uncharacterized protein"
                     /note="Uniprot:M9WUS6"
                     /fasta_file="/home/lisa/Wolbachia_genomes/Genome_seqs/9_wol_genomes.faa:fasta/wFol15600.fasta.out"
                     /blastp_file="uniprot_all.fasta:blastp/wFol15600.out"
     gene            620510..621133
                     /locus_tag="wFol_05060"
     CDS             620510..621133
                     /locus_tag="wFol_05060"
                     /product="Outer membrane protein"
                     /note="Uniprot:Q73IT6"
                     /fasta_file="/home/lisa/Wolbachia_genomes/Genome_seqs/9_wol_genomes.faa:fasta/wFol15590.fasta.out"
                     /blastp_file="uniprot_all.fasta:blastp/wFol15590.out"
     gene            621220..621828
                     /locus_tag="wFol_05070"
     CDS             621220..621828
                     /locus_tag="wFol_05070"
                     /product="Outer membrane protein"
                     /fasta_file="/home/lisa/Wolbachia_genomes/Genome_seqs/9_wol_genomes.faa:fasta/wFol15580.fasta.out"
                     /blastp_file="uniprot_all.fasta:blastp/wFol15580.out"
     gene            622099..623169
                     /locus_tag="wFol_05080"
     CDS             622099..623169
                     /locus_tag="wFol_05080"
                     /product="Protein RecA"
                     /note="Uniprot:A0A097GWD3"
                     /gene="recA"
                     /fasta_file="/home/lisa/Wolbachia_genomes/Genome_seqs/9_wol_genomes.faa:fasta/wFol15570.fasta.out"
                     /blastp_file="uniprot_all.fasta:blastp/wFol15570.out"
     gene            623256..623948
                     /locus_tag="wFol_05090"
     CDS             623256..623948
                     /locus_tag="wFol_05090"
                     /product="Phosphatidylserine decarboxylase proenzyme"
                     /note="Uniprot:A0A060Q4E6"
                     /gene="psd"
                     /fasta_file="/home/lisa/Wolbachia_genomes/Genome_seqs/9_wol_genomes.faa:fasta/wFol15560.fasta.out"
                     /blastp_file="uniprot_all.fasta:blastp/wFol15560.out"
     gene            623945..624718
                     /locus_tag="wFol_05100"
     CDS             623945..624718
                     /locus_tag="wFol_05100"
                     /product="Putative CDP-diacylglycerol--serine
                     O-phosphatidyltransferase"
                     /note="Uniprot:C0R4D9"
                     /fasta_file="/home/lisa/Wolbachia_genomes/Genome_seqs/9_wol_genomes.faa:fasta/wFol15550.fasta.out"
                     /blastp_file="uniprot_all.fasta:blastp/wFol15550.out"
     gene            complement(625150..625761)
                     /locus_tag="wFol_05110"
     CDS             complement(625150..625761)
                     /locus_tag="wFol_05110"
                     /product="Uncharacterized protein"
                     /note="Uniprot:Q5GSA7"
                     /fasta_file="/home/lisa/Wolbachia_genomes/Genome_seqs/9_wol_genomes.faa:fasta/wFol15530.fasta.out"
                     /blastp_file="uniprot_all.fasta:blastp/wFol15530.out"
     gene            complement(626017..627006)
                     /locus_tag="wFol_05120"
     CDS             complement(626017..627006)
                     /locus_tag="wFol_05120"
                     /product="Surface antigen-related protein"
                     /fasta_file="/home/lisa/Wolbachia_genomes/Genome_seqs/9_wol_genomes.faa:fasta/wFol15520.fasta.out"
                     /blastp_file="uniprot_all.fasta:blastp/wFol15520.out"
     gene            627139..628467
                     /locus_tag="wFol_05130"
     CDS             627139..628467
                     /locus_tag="wFol_05130"
                     /product="tRNA modification GTPase MnmE"
                     /note="Uniprot:B6Y6V2"
                     /gene="mnmE"
                     /fasta_file="/home/lisa/Wolbachia_genomes/Genome_seqs/9_wol_genomes.faa:fasta/wFol15510.fasta.out"
                     /blastp_file="uniprot_all.fasta:blastp/wFol15510.out"
     tRNA            628614..628704
                     /ID="tRNA:Ser-3"
                     /Codon="TGA"
                     /score=73.62
                     /Name="tRNA:Ser-3"
                     /AminoAcid="Ser-3"
     gene            complement(628683..629948)
                     /locus_tag="wFol_05140"
     CDS             complement(628683..629948)
                     /locus_tag="wFol_05140"
                     /product="Histidine--tRNA ligase"
                     /note="Uniprot:M9WV96"
                     /gene="hisS"
                     /fasta_file="/home/lisa/Wolbachia_genomes/Genome_seqs/9_wol_genomes.faa:fasta/wFol15500.fasta.out"
                     /blastp_file="uniprot_all.fasta:blastp/wFol15500.out"
     gene            complement(629953..630537)
                     /locus_tag="wFol_05150"
     CDS             complement(629953..630537)
                     /locus_tag="wFol_05150"
                     /product="NifU domain protein"
                     /note="Uniprot:C0F8E8"
                     /fasta_file="/home/lisa/Wolbachia_genomes/Genome_seqs/9_wol_genomes.faa:fasta/wFol15490.fasta.out"
                     /blastp_file="uniprot_all.fasta:blastp/wFol15490.out"
     gene            630587..630958
                     /locus_tag="wFol_05160"
     CDS             630587..630958
                     /locus_tag="wFol_05160"
                     /product="DnaJ domain protein"
                     /note="Uniprot:A0A178GXH7"
                     /fasta_file="/home/lisa/Wolbachia_genomes/Genome_seqs/9_wol_genomes.faa:fasta/wFol15480.fasta.out"
                     /blastp_file="uniprot_all.fasta:blastp/wFol15480.out"
     gene            complement(630987..631553)
                     /locus_tag="wFol_05170"
     CDS             complement(630987..631553)
                     /locus_tag="wFol_05170"
                     /product="Unique protein"
                     /fasta_file="/home/lisa/Wolbachia_genomes/Genome_seqs/9_wol_genomes.faa:fasta/wFol15470.fasta.out"
                     /blastp_file="uniprot_all.fasta:blastp/wFol15470.out"
     gene            complement(631800..632354)
                     /locus_tag="wFol_05180"
     CDS             complement(631800..632354)
                     /locus_tag="wFol_05180"
                     /product="Unique protein"
                     /fasta_file="/home/lisa/Wolbachia_genomes/Genome_seqs/9_wol_genomes.faa:fasta/wFol15460.fasta.out"
                     /blastp_file="uniprot_all.fasta:blastp/wFol15460.out"
     gene            complement(632640..633185)
                     /locus_tag="wFol_05190"
     CDS             complement(632640..633185)
                     /locus_tag="wFol_05190"
                     /product="Unique protein"
                     /fasta_file="/home/lisa/Wolbachia_genomes/Genome_seqs/9_wol_genomes.faa:fasta/wFol15450.fasta.out"
                     /blastp_file="uniprot_all.fasta:blastp/wFol15450.out"
     gene            633544..633924
                     /locus_tag="wFol_05200"
     CDS             633544..633924
                     /locus_tag="wFol_05200"
                     /product="Putative membrane protein"
                     /fasta_file="/home/lisa/Wolbachia_genomes/Genome_seqs/9_wol_genomes.faa:fasta/wFol15440.fasta.out"
                     /blastp_file="uniprot_all.fasta:blastp/wFol15440.out"
     misc_feature    633544..765813
                     /locus_tag="phage region"
     gene            634041..634997
                     /locus_tag="wFol_05210"
     CDS             634041..634997
                     /locus_tag="wFol_05210"
                     /product="Unique protein"
                     /fasta_file="/home/lisa/Wolbachia_genomes/Genome_seqs/9_wol_genomes.faa:fasta/wFol15430.fasta.out"
                     /blastp_file="uniprot_all.fasta:blastp/wFol15430.out"
     gene            635435..636733
                     /locus_tag="wFol_05220"
     CDS             635435..636733
                     /locus_tag="wFol_05220"
                     /product="Uncharacterized protein"
                     /note="Uniprot:A0A0P6P432"
                     /fasta_file="/home/lisa/Wolbachia_genomes/Genome_seqs/9_wol_genomes.faa:fasta/wFol15420.fasta.out"
                     /blastp_file="uniprot_all.fasta:blastp/wFol15420.out"
     gene            636714..637256
                     /locus_tag="wFol_05230"
     CDS             636714..637256
                     /locus_tag="wFol_05230"
                     /product="Unique protein"
                     /fasta_file="/home/lisa/Wolbachia_genomes/Genome_seqs/9_wol_genomes.faa:fasta/wFol15410.fasta.out"
                     /blastp_file="uniprot_all.fasta:blastp/wFol15410.out"
     gene            complement(637188..637808)
                     /locus_tag="wFol_05240"
                     /note="Uncharacterized protein, truncation"
                     /note="Uniprot:A0A0P6P4V3"
                     /fasta_file="/home/lisa/Wolbachia_genomes/Genome_seqs/9_wol_genomes.faa:fasta/wFol15400.fasta.out"
                     /blastp_file="uniprot_all.fasta:blastp/wFol15400.out"
                     /pseudo
     gene            complement(638419..640512)
                     /locus_tag="wFol_05250"
     CDS             complement(638419..640512)
                     /locus_tag="wFol_05250"
                     /product="Resolvase"
                     /note="Uniprot:A0A125SIR4"
                     /fasta_file="/home/lisa/Wolbachia_genomes/Genome_seqs/9_wol_genomes.faa:fasta/wFol15390.fasta.out"
                     /blastp_file="uniprot_all.fasta:blastp/wFol15390.out"
     gene            complement(640966..641313)
                     /locus_tag="wFol_05260"
                     /note="Putative reverse transcriptase, truncation"
                     /note="Uniprot:B3CMG0"
                     /fasta_file="/home/lisa/Wolbachia_genomes/Genome_seqs/9_wol_genomes.faa:fasta/wFol15370.fasta.out"
                     /blastp_file="uniprot_all.fasta:blastp/wFol15370.out"
                     /pseudo
     gene            complement(641768..642214)
                     /locus_tag="wFol_05270"
     CDS             complement(641768..642214)
                     /locus_tag="wFol_05270"
                     /product="Putative phage repressor protein"
                     /note="Uniprot:Q2GG40"
                     /fasta_file="/home/lisa/Wolbachia_genomes/Genome_seqs/9_wol_genomes.faa:fasta/wFol15360.fasta.out"
                     /blastp_file="uniprot_all.fasta:blastp/wFol15360.out"
     gene            642284..642631
                     /locus_tag="wFol_05280"
     CDS             642284..642631
                     /locus_tag="wFol_05280"
                     /product="Putative phage repressor protein"
                     /note="Uniprot:M9WT06"
                     /fasta_file="/home/lisa/Wolbachia_genomes/Genome_seqs/9_wol_genomes.faa:fasta/wFol15350.fasta.out"
                     /blastp_file="uniprot_all.fasta:blastp/wFol15350.out"
     gene            complement(642628..643707)
                     /locus_tag="wFol_05290"
     CDS             complement(642628..643707)
                     /locus_tag="wFol_05290"
                     /product="Uncharacterized protein"
                     /note="Uniprot:B9A940"
                     /fasta_file="/home/lisa/Wolbachia_genomes/Genome_seqs/9_wol_genomes.faa:fasta/wFol15340.fasta.out"
                     /blastp_file="uniprot_all.fasta:blastp/wFol15340.out"
     gene            644002..644652
                     /locus_tag="wFol_05300"
     CDS             644002..644652
                     /locus_tag="wFol_05300"
                     /product="RadC family protein"
                     /note="Uniprot:A0A0P6NXS9"
                     /gene="radC"
                     /fasta_file="/home/lisa/Wolbachia_genomes/Genome_seqs/9_wol_genomes.faa:fasta/wFol15330.fasta.out"
                     /blastp_file="uniprot_all.fasta:blastp/wFol15330.out"
     gene            644907..645761
                     /locus_tag="wFol_05310"
     CDS             644907..645761
                     /locus_tag="wFol_05310"
                     /product="Transposase, IS110 family"
                     /note="no group"
                     /note="Uniprot:M9WYR7"
                     /fasta_file="/home/lisa/Wolbachia_genomes/Genome_seqs/9_wol_genomes.faa:fasta/wFol15320.fasta.out"
                     /blastp_file="uniprot_all.fasta:blastp/wFol15320.out"
     gene            645737..646069
                     /locus_tag="wFol_05320"
     CDS             645737..646069
                     /locus_tag="wFol_05320"
                     /product="Unique protein"
                     /fasta_file="/home/lisa/Wolbachia_genomes/Genome_seqs/9_wol_genomes.faa:fasta/wFol15310.fasta.out"
                     /blastp_file="uniprot_all.fasta:blastp/wFol15310.out"
     gene            646231..648324
                     /locus_tag="wFol_05330"
     CDS             646231..648324
                     /locus_tag="wFol_05330"
                     /product="Resolvase"
                     /note="Uniprot:A0A125SIR4"
                     /fasta_file="/home/lisa/Wolbachia_genomes/Genome_seqs/9_wol_genomes.faa:fasta/wFol15290.fasta.out"
                     /blastp_file="uniprot_all.fasta:blastp/wFol15290.out"
     gene            648935..649831
                     /locus_tag="wFol_05340"
     CDS             648935..649831
                     /locus_tag="wFol_05340"
                     /product="Uncharacterized protein"
                     /note="Uniprot:A0A0P6P4V3"
                     /fasta_file="/home/lisa/Wolbachia_genomes/Genome_seqs/9_wol_genomes.faa:fasta/wFol15280.fasta.out"
                     /blastp_file="uniprot_all.fasta:blastp/wFol15280.out"
     gene            complement(649976..650557)
                     /locus_tag="wFol_05350"
     CDS             complement(649976..650557)
                     /locus_tag="wFol_05350"
                     /product="Uncharacterized protein"
                     /note="Uniprot:A0A178GVV5"
                     /fasta_file="/home/lisa/Wolbachia_genomes/Genome_seqs/9_wol_genomes.faa:fasta/wFol15270.fasta.out"
                     /blastp_file="uniprot_all.fasta:blastp/wFol15270.out"
     gene            complement(650772..651683)
                     /locus_tag="wFol_05360"
     CDS             complement(650772..651683)
                     /locus_tag="wFol_05360"
                     /product="Transposase, PD-(D/E)XK nuclease family"
                     /note="Uniprot:A0A178GUZ5"
                     /fasta_file="/home/lisa/Wolbachia_genomes/Genome_seqs/9_wol_genomes.faa:fasta/wFol15260.fasta.out"
                     /blastp_file="uniprot_all.fasta:blastp/wFol15260.out"
     gene            complement(652220..652465)
                     /locus_tag="wFol_05370"
     CDS             complement(652220..652465)
                     /locus_tag="wFol_05370"
                     /product="Putative phage repressor protein"
                     /fasta_file="/home/lisa/Wolbachia_genomes/Genome_seqs/9_wol_genomes.faa:fasta/wFol15250.fasta.out"
                     /blastp_file="uniprot_all.fasta:blastp/wFol15250.out"
     gene            complement(652521..654467)
                     /locus_tag="wFol_05380"
     CDS             complement(652521..654467)
                     /locus_tag="wFol_05380"
                     /product="DNA ligase"
                     /note="Uniprot:A0A178GUE3"
                     /gene="ligA"
                     /fasta_file="/home/lisa/Wolbachia_genomes/Genome_seqs/9_wol_genomes.faa:fasta/wFol15240.fasta.out"
                     /blastp_file="uniprot_all.fasta:blastp/wFol15240.out"
     gene            complement(654471..654731)
                     /locus_tag="wFol_05390"
     CDS             complement(654471..654731)
                     /locus_tag="wFol_05390"
                     /product="Putative phage repressor protein"
                     /note="Uniprot:C6V3R8"
                     /fasta_file="/home/lisa/Wolbachia_genomes/Genome_seqs/9_wol_genomes.faa:fasta/wFol15230.fasta.out"
                     /blastp_file="uniprot_all.fasta:blastp/wFol15230.out"
     gene            complement(654756..655586)
                     /locus_tag="wFol_05400"
     CDS             complement(654756..655586)
                     /locus_tag="wFol_05400"
                     /product="Ankyrin repeat domain protein"
                     /note="Uniprot:A2FYD8"
                     /fasta_file="/home/lisa/Wolbachia_genomes/Genome_seqs/9_wol_genomes.faa:fasta/wFol15220.fasta.out"
                     /blastp_file="uniprot_all.fasta:blastp/wFol15220.out"
     gene            complement(656082..657008)
                     /locus_tag="wFol_05410"
     CDS             complement(656082..657008)
                     /locus_tag="wFol_05410"
                     /product="Patatin family protein"
                     /note="Uniprot:A0A098AQT3"
                     /fasta_file="/home/lisa/Wolbachia_genomes/Genome_seqs/9_wol_genomes.faa:fasta/wFol15200.fasta.out"
                     /blastp_file="uniprot_all.fasta:blastp/wFol15200.out"
     gene            657010..657525
                     /locus_tag="wFol_05420"
     CDS             657010..657525
                     /locus_tag="wFol_05420"
                     /product="Phospholipase D-like protein"
                     /note="Uniprot:B3CP52"
                     /fasta_file="/home/lisa/Wolbachia_genomes/Genome_seqs/9_wol_genomes.faa:fasta/wFol15190.fasta.out"
                     /blastp_file="uniprot_all.fasta:blastp/wFol15190.out"
     gene            complement(657526..657765)
                     /locus_tag="wFol_05430"
     CDS             complement(657526..657765)
                     /locus_tag="wFol_05430"
                     /product="Putative membrane protein"
                     /note="Uniprot:B3CPQ8"
                     /fasta_file="/home/lisa/Wolbachia_genomes/Genome_seqs/9_wol_genomes.faa:fasta/wFol15180.fasta.out"
                     /blastp_file="uniprot_all.fasta:blastp/wFol15180.out"
     gene            complement(657838..658368)
                     /locus_tag="wFol_05440"
     CDS             complement(657838..658368)
                     /locus_tag="wFol_05440"
                     /product="Ankyrin repeat domain protein"
                     /note="Uniprot:B6Y9N3"
                     /fasta_file="/home/lisa/Wolbachia_genomes/Genome_seqs/9_wol_genomes.faa:fasta/wFol15170.fasta.out"
                     /blastp_file="uniprot_all.fasta:blastp/wFol15170.out"
     gene            complement(658420..659361)
                     /locus_tag="wFol_05450"
     CDS             complement(658420..659361)
                     /locus_tag="wFol_05450"
                     /product="Phage late control gene D protein"
                     /note="Uniprot:E9P5Z1"
                     /fasta_file="/home/lisa/Wolbachia_genomes/Genome_seqs/9_wol_genomes.faa:fasta/wFol15160.fasta.out"
                     /blastp_file="uniprot_all.fasta:blastp/wFol15160.out"
     gene            complement(659362..659568)
                     /locus_tag="wFol_05460"
     CDS             complement(659362..659568)
                     /locus_tag="wFol_05460"
                     /product="Phage tail protein X"
                     /note="Uniprot:A0A176Q5G4"
                     /fasta_file="/home/lisa/Wolbachia_genomes/Genome_seqs/9_wol_genomes.faa:fasta/wFol15150.fasta.out"
                     /blastp_file="uniprot_all.fasta:blastp/wFol15150.out"
     gene            complement(659565..659921)
                     /locus_tag="wFol_05470"
     CDS             complement(659565..659921)
                     /locus_tag="wFol_05470"
                     /product="Phage tail protein GpU"
                     /note="Uniprot:A0A0U1D970"
                     /fasta_file="/home/lisa/Wolbachia_genomes/Genome_seqs/9_wol_genomes.faa:fasta/wFol15140.fasta.out"
                     /blastp_file="uniprot_all.fasta:blastp/wFol15140.out"
     gene            complement(659921..662251)
                     /locus_tag="wFol_05480"
     CDS             complement(659921..662251)
                     /locus_tag="wFol_05480"
                     /product="Phage tail tape measure protein"
                     /note="Uniprot:A0A176Q5G0"
                     /fasta_file="/home/lisa/Wolbachia_genomes/Genome_seqs/9_wol_genomes.faa:fasta/wFol15130.fasta.out"
                     /blastp_file="uniprot_all.fasta:blastp/wFol15130.out"
     gene            complement(662361..662618)
                     /locus_tag="wFol_05490"
     CDS             complement(662361..662618)
                     /locus_tag="wFol_05490"
                     /product="Phage tail assembly chaperone protein"
                     /note="Uniprot:B3CNY1"
                     /fasta_file="/home/lisa/Wolbachia_genomes/Genome_seqs/9_wol_genomes.faa:fasta/wFol15120.fasta.out"
                     /blastp_file="uniprot_all.fasta:blastp/wFol15120.out"
     gene            complement(662697..662978)
                     /locus_tag="wFol_05500"
     CDS             complement(662697..662978)
                     /locus_tag="wFol_05500"
                     /product="Putative ParE toxin of type II toxin-antitoxin
                     system, parDE"
                     /note="Uniprot:A0A098AQU0"
                     /gene="relG_2"
                     /fasta_file="/home/lisa/Wolbachia_genomes/Genome_seqs/9_wol_genomes.faa:fasta/wFol15110.fasta.out"
                     /blastp_file="uniprot_all.fasta:blastp/wFol15110.out"
     gene            complement(662962..663171)
                     /locus_tag="wFol_05510"
     CDS             complement(662962..663171)
                     /locus_tag="wFol_05510"
                     /product="Uncharacterized protein"
                     /note="Uniprot:A0A060PX44"
                     /fasta_file="/home/lisa/Wolbachia_genomes/Genome_seqs/9_wol_genomes.faa:fasta/wFol15100.fasta.out"
                     /blastp_file="uniprot_all.fasta:blastp/wFol15100.out"
     gene            complement(663234..663740)
                     /locus_tag="wFol_05520"
     CDS             complement(663234..663740)
                     /locus_tag="wFol_05520"
                     /product="Phage tail tube protein FII"
                     /note="Uniprot:A0A176Q5F0"
                     /fasta_file="/home/lisa/Wolbachia_genomes/Genome_seqs/9_wol_genomes.faa:fasta/wFol15090.fasta.out"
                     /blastp_file="uniprot_all.fasta:blastp/wFol15090.out"
     gene            complement(663759..664934)
                     /locus_tag="wFol_05530"
     CDS             complement(663759..664934)
                     /locus_tag="wFol_05530"
                     /product="Phage major tail sheath protein"
                     /note="Uniprot:B9A923"
                     /fasta_file="/home/lisa/Wolbachia_genomes/Genome_seqs/9_wol_genomes.faa:fasta/wFol15080.fasta.out"
                     /blastp_file="uniprot_all.fasta:blastp/wFol15080.out"
     gene            complement(665066..665644)
                     /locus_tag="wFol_05540"
     CDS             complement(665066..665644)
                     /locus_tag="wFol_05540"
                     /product="Putative phage related protein"
                     /note="Uniprot:A0A0P6NU40"
                     /fasta_file="/home/lisa/Wolbachia_genomes/Genome_seqs/9_wol_genomes.faa:fasta/wFol15070.fasta.out"
                     /blastp_file="uniprot_all.fasta:blastp/wFol15070.out"
     gene            complement(665657..667008)
                     /locus_tag="wFol_05550"
                     /note="Putative phage related protein, contains frameshift
                     mutation"
                     /note="Uniprot:A0A0P6NN57"
                     /note="Uniprot:A0A178GUW8"
                     /fasta_file="/home/lisa/Wolbachia_genomes/Genome_seqs/9_wol_genomes.faa:fasta/wFol15050.fasta.out"
                     /fasta_file="/home/lisa/Wolbachia_genomes/Genome_seqs/9_wol_genomes.faa:fasta/wFol15060.fasta.out"
                     /blastp_file="uniprot_all.fasta:blastp/wFol15050.out"
                     /blastp_file="uniprot_all.fasta:blastp/wFol15060.out"
                     /pseudo
     gene            complement(667005..667205)
                     /locus_tag="wFol_05560"
     CDS             complement(667005..667205)
                     /locus_tag="wFol_05560"
                     /product="Putative phage related protein"
                     /note="Uniprot:A0A0P6NQG3"
                     /fasta_file="/home/lisa/Wolbachia_genomes/Genome_seqs/9_wol_genomes.faa:fasta/wFol15040.fasta.out"
                     /blastp_file="uniprot_all.fasta:blastp/wFol15040.out"
     gene            complement(667210..668403)
                     /locus_tag="wFol_05570"
     CDS             complement(667210..668403)
                     /locus_tag="wFol_05570"
                     /product="Putative phage related protein"
                     /note="Uniprot:A0A098ARQ4"
                     /fasta_file="/home/lisa/Wolbachia_genomes/Genome_seqs/9_wol_genomes.faa:fasta/wFol15030.fasta.out"
                     /blastp_file="uniprot_all.fasta:blastp/wFol15030.out"
     gene            complement(668440..670398)
                     /locus_tag="wFol_05580"
     CDS             complement(668440..670398)
                     /locus_tag="wFol_05580"
                     /product="Putative phage related protein"
                     /note="Uniprot:B3CNX3"
                     /fasta_file="/home/lisa/Wolbachia_genomes/Genome_seqs/9_wol_genomes.faa:fasta/wFol15020.fasta.out"
                     /blastp_file="uniprot_all.fasta:blastp/wFol15020.out"
     gene            complement(670455..671138)
                     /locus_tag="wFol_05590"
     CDS             complement(670455..671138)
                     /locus_tag="wFol_05590"
                     /product="Putative phage related protein"
                     /note="Uniprot:M9WU13"
                     /fasta_file="/home/lisa/Wolbachia_genomes/Genome_seqs/9_wol_genomes.faa:fasta/wFol15010.fasta.out"
                     /blastp_file="uniprot_all.fasta:blastp/wFol15010.out"
     gene            671258..671716
                     /locus_tag="wFol_05600"
     CDS             671258..671716
                     /locus_tag="wFol_05600"
                     /product="Putative phage related protein"
                     /note="Uniprot:A0A176Q215"
                     /fasta_file="/home/lisa/Wolbachia_genomes/Genome_seqs/9_wol_genomes.faa:fasta/wFol15000.fasta.out"
                     /blastp_file="uniprot_all.fasta:blastp/wFol15000.out"
     gene            complement(671713..673788)
                     /locus_tag="wFol_05610"
     CDS             complement(671713..673788)
                     /locus_tag="wFol_05610"
                     /product="Putative DNA repair protein"
                     /note="Uniprot:A0A176Q8V3"
                     /fasta_file="/home/lisa/Wolbachia_genomes/Genome_seqs/9_wol_genomes.faa:fasta/wFol14990.fasta.out"
                     /blastp_file="uniprot_all.fasta:blastp/wFol14990.out"
     gene            complement(673826..675088)
                     /locus_tag="wFol_05620"
     CDS             complement(673826..675088)
                     /locus_tag="wFol_05620"
                     /product="Presumed DNA repair protein"
                     /note="Uniprot:A0A0P6NQ93"
                     /fasta_file="/home/lisa/Wolbachia_genomes/Genome_seqs/9_wol_genomes.faa:fasta/wFol14980.fasta.out"
                     /blastp_file="uniprot_all.fasta:blastp/wFol14980.out"
     gene            complement(675085..675582)
                     /locus_tag="wFol_05630"
     CDS             complement(675085..675582)
                     /locus_tag="wFol_05630"
                     /product="Putative phage related protein"
                     /note="Uniprot:B3CNW8"
                     /fasta_file="/home/lisa/Wolbachia_genomes/Genome_seqs/9_wol_genomes.faa:fasta/wFol14970.fasta.out"
                     /blastp_file="uniprot_all.fasta:blastp/wFol14970.out"
     gene            complement(675620..676441)
                     /locus_tag="wFol_05640"
     CDS             complement(675620..676441)
                     /locus_tag="wFol_05640"
                     /product="Presumed DNA repair protein"
                     /note="Uniprot:A0A0P6NQG6"
                     /fasta_file="/home/lisa/Wolbachia_genomes/Genome_seqs/9_wol_genomes.faa:fasta/wFol14960.fasta.out"
                     /blastp_file="uniprot_all.fasta:blastp/wFol14960.out"
     gene            complement(676459..677280)
                     /locus_tag="wFol_05650"
     CDS             complement(676459..677280)
                     /locus_tag="wFol_05650"
                     /product="Presumed phage protein"
                     /note="Uniprot:B3CNW6"
                     /fasta_file="/home/lisa/Wolbachia_genomes/Genome_seqs/9_wol_genomes.faa:fasta/wFol14950.fasta.out"
                     /blastp_file="uniprot_all.fasta:blastp/wFol14950.out"
     gene            complement(677347..677838)
                     /locus_tag="wFol_05660"
     CDS             complement(677347..677838)
                     /locus_tag="wFol_05660"
                     /product="Sigma-70 domain protein"
                     /note="Uniprot:E9P5X8"
                     /fasta_file="/home/lisa/Wolbachia_genomes/Genome_seqs/9_wol_genomes.faa:fasta/wFol14940.fasta.out"
                     /blastp_file="uniprot_all.fasta:blastp/wFol14940.out"
     gene            678062..678898
                     /locus_tag="wFol_05670"
     CDS             678062..678898
                     /locus_tag="wFol_05670"
                     /product="Putative transcriptional regulator, AbiEi
                     antitoxin"
                     /fasta_file="/home/lisa/Wolbachia_genomes/Genome_seqs/9_wol_genomes.faa:fasta/wFol14930.fasta.out"
                     /blastp_file="uniprot_all.fasta:blastp/wFol14930.out"
     gene            679221..679901
                     /locus_tag="wFol_05680"
                     /note="Putative rhoptry protein, truncated"
                     /note="Uniprot:A0A059PCU2"
                     /fasta_file="/home/lisa/Wolbachia_genomes/Genome_seqs/9_wol_genomes.faa:fasta/wFol14920.fasta.out"
                     /blastp_file="uniprot_all.fasta:blastp/wFol14920.out"
                     /pseudo
     gene            680747..680944
                     /locus_tag="wFol_05690"
     CDS             680747..680944
                     /locus_tag="wFol_05690"
                     /product="Putative membrane protein"
                     /fasta_file="/home/lisa/Wolbachia_genomes/Genome_seqs/9_wol_genomes.faa:fasta/wFol14910.fasta.out"
                     /blastp_file="uniprot_all.fasta:blastp/wFol14910.out"
     gene            680938..681627
                     /locus_tag="wFol_05700"
                     /note="Presumed DNA repair protein, truncation"
                     /note="Uniprot:H0U0Y6"
                     /fasta_file="/home/lisa/Wolbachia_genomes/Genome_seqs/9_wol_genomes.faa:fasta/wFol14900.fasta.out"
                     /blastp_file="uniprot_all.fasta:blastp/wFol14900.out"
                     /pseudo
     gene            681734..682426
                     /locus_tag="wFol_05710"
                     /note="Presumed DNA repair protein, contains stop codon
                     within domain"
                     /note="Uniprot:H0U0Y6"
                     /fasta_file="/home/lisa/Wolbachia_genomes/Genome_seqs/9_wol_genomes.faa:fasta/wFol14880.fasta.out"
                     /fasta_file="/home/lisa/Wolbachia_genomes/Genome_seqs/9_wol_genomes.faa:fasta/wFol14890.fasta.out"
                     /blastp_file="uniprot_all.fasta:blastp/wFol14880.out"
                     /blastp_file="uniprot_all.fasta:blastp/wFol14890.out"
                     /pseudo
     gene            682428..682916
                     /locus_tag="wFol_05720"
     CDS             682428..682916
                     /locus_tag="wFol_05720"
                     /product="Putative holliday junction resolvase RuvC"
                     /note="Uniprot:A0A059PCS8"
                     /fasta_file="/home/lisa/Wolbachia_genomes/Genome_seqs/9_wol_genomes.faa:fasta/wFol14870.fasta.out"
                     /blastp_file="uniprot_all.fasta:blastp/wFol14870.out"
     gene            683175..684410
                     /locus_tag="wFol_05730"
     CDS             683175..684410
                     /locus_tag="wFol_05730"
                     /product="Phage related DNA methylase"
                     /note="Uniprot:A0A098ASM0"
                     /fasta_file="/home/lisa/Wolbachia_genomes/Genome_seqs/9_wol_genomes.faa:fasta/wFol14860.fasta.out"
                     /blastp_file="uniprot_all.fasta:blastp/wFol14860.out"
     gene            684433..684939
                     /locus_tag="wFol_05740"
     CDS             684433..684939
                     /locus_tag="wFol_05740"
                     /product="Putative phage related protein"
                     /note="Uniprot:A0A059PCT8"
                     /fasta_file="/home/lisa/Wolbachia_genomes/Genome_seqs/9_wol_genomes.faa:fasta/wFol14850.fasta.out"
                     /blastp_file="uniprot_all.fasta:blastp/wFol14850.out"
     gene            684965..686566
                     /locus_tag="wFol_05750"
     CDS             684965..686566
                     /locus_tag="wFol_05750"
                     /product="Ankyrin repeat domain protein"
                     /note="Uniprot:A0A098ARR7"
                     /fasta_file="/home/lisa/Wolbachia_genomes/Genome_seqs/9_wol_genomes.faa:fasta/wFol14840.fasta.out"
                     /blastp_file="uniprot_all.fasta:blastp/wFol14840.out"
     gene            686563..688389
                     /locus_tag="wFol_05760"
     CDS             686563..688389
                     /locus_tag="wFol_05760"
                     /product="Phage terminase large subunit GpA"
                     /note="Uniprot:M9WQ52"
                     /fasta_file="/home/lisa/Wolbachia_genomes/Genome_seqs/9_wol_genomes.faa:fasta/wFol14830.fasta.out"
                     /blastp_file="uniprot_all.fasta:blastp/wFol14830.out"
     gene            688391..688624
                     /locus_tag="wFol_05770"
     CDS             688391..688624
                     /locus_tag="wFol_05770"
                     /product="GpW-like phage protein"
                     /note="Uniprot:A0A098ARR9"
                     /fasta_file="/home/lisa/Wolbachia_genomes/Genome_seqs/9_wol_genomes.faa:fasta/wFol14820.fasta.out"
                     /blastp_file="uniprot_all.fasta:blastp/wFol14820.out"
     gene            688653..688928
                     /locus_tag="wFol_05780"
     CDS             688653..688928
                     /locus_tag="wFol_05780"
                     /product="Uncharacterized protein"
                     /note="Uniprot:Q73HG3"
                     /fasta_file="/home/lisa/Wolbachia_genomes/Genome_seqs/9_wol_genomes.faa:fasta/wFol14810.fasta.out"
                     /blastp_file="uniprot_all.fasta:blastp/wFol14810.out"
     gene            688919..689203
                     /locus_tag="wFol_05790"
     CDS             688919..689203
                     /locus_tag="wFol_05790"
                     /product="Putative ParE toxin of type II toxin-antitoxin
                     system, parDE"
                     /note="Uniprot:Q73HG2"
                     /fasta_file="/home/lisa/Wolbachia_genomes/Genome_seqs/9_wol_genomes.faa:fasta/wFol14800.fasta.out"
                     /blastp_file="uniprot_all.fasta:blastp/wFol14800.out"
     gene            689334..690746
                     /locus_tag="wFol_05800"
     CDS             689334..690746
                     /locus_tag="wFol_05800"
                     /product="Putative phage portal protein, lambda family"
                     /note="Uniprot:B3CNV5"
                     /fasta_file="/home/lisa/Wolbachia_genomes/Genome_seqs/9_wol_genomes.faa:fasta/wFol14790.fasta.out"
                     /blastp_file="uniprot_all.fasta:blastp/wFol14790.out"
     gene            690761..691849
                     /locus_tag="wFol_05810"
     CDS             690761..691849
                     /locus_tag="wFol_05810"
                     /product="Putative phage minor capsid protein C"
                     /note="Uniprot:Q9JMP1"
                     /fasta_file="/home/lisa/Wolbachia_genomes/Genome_seqs/9_wol_genomes.faa:fasta/wFol14780.fasta.out"
                     /blastp_file="uniprot_all.fasta:blastp/wFol14780.out"
     gene            691955..692326
                     /locus_tag="wFol_05820"
     CDS             691955..692326
                     /locus_tag="wFol_05820"
                     /product="Putative phage head decoration protein D"
                     /note="Uniprot:A0A098ASL2"
                     /fasta_file="/home/lisa/Wolbachia_genomes/Genome_seqs/9_wol_genomes.faa:fasta/wFol14770.fasta.out"
                     /blastp_file="uniprot_all.fasta:blastp/wFol14770.out"
     gene            692331..693332
                     /locus_tag="wFol_05830"
     CDS             692331..693332
                     /locus_tag="wFol_05830"
                     /product="Putative phage major capsid protein E"
                     /note="Uniprot:C0R4U6"
                     /fasta_file="/home/lisa/Wolbachia_genomes/Genome_seqs/9_wol_genomes.faa:fasta/wFol14760.fasta.out"
                     /blastp_file="uniprot_all.fasta:blastp/wFol14760.out"
     gene            693410..693721
                     /locus_tag="wFol_05840"
     CDS             693410..693721
                     /locus_tag="wFol_05840"
                     /product="Putative phage related protein"
                     /note="Uniprot:C0R4U5"
                     /fasta_file="/home/lisa/Wolbachia_genomes/Genome_seqs/9_wol_genomes.faa:fasta/wFol14750.fasta.out"
                     /blastp_file="uniprot_all.fasta:blastp/wFol14750.out"
     gene            693723..694235
                     /locus_tag="wFol_05850"
     CDS             693723..694235
                     /locus_tag="wFol_05850"
                     /product="Putative phage minor tail protein Z"
                     /note="Uniprot:A0A098AT21"
                     /fasta_file="/home/lisa/Wolbachia_genomes/Genome_seqs/9_wol_genomes.faa:fasta/wFol14740.fasta.out"
                     /blastp_file="uniprot_all.fasta:blastp/wFol14740.out"
     gene            694232..694705
                     /locus_tag="wFol_05860"
     CDS             694232..694705
                     /locus_tag="wFol_05860"
                     /product="Putative phage related protein"
                     /note="Uniprot:A0A178GUD7"
                     /fasta_file="/home/lisa/Wolbachia_genomes/Genome_seqs/9_wol_genomes.faa:fasta/wFol14730.fasta.out"
                     /blastp_file="uniprot_all.fasta:blastp/wFol14730.out"
     gene            694692..695156
                     /locus_tag="wFol_05870"
     CDS             694692..695156
                     /locus_tag="wFol_05870"
                     /product="Phage baseplate assembly protein V"
                     /note="Uniprot:B3CP84"
                     /fasta_file="/home/lisa/Wolbachia_genomes/Genome_seqs/9_wol_genomes.faa:fasta/wFol14720.fasta.out"
                     /blastp_file="uniprot_all.fasta:blastp/wFol14720.out"
     gene            695156..695410
                     /locus_tag="wFol_05880"
     CDS             695156..695410
                     /locus_tag="wFol_05880"
                     /product="PAAR-family protein"
                     /note="Uniprot:A0A176Q726"
                     /fasta_file="/home/lisa/Wolbachia_genomes/Genome_seqs/9_wol_genomes.faa:fasta/wFol14710.fasta.out"
                     /blastp_file="uniprot_all.fasta:blastp/wFol14710.out"
     gene            695417..695752
                     /locus_tag="wFol_05890"
     CDS             695417..695752
                     /locus_tag="wFol_05890"
                     /product="Putative phage baseplate assembly protein GPW"
                     /note="Uniprot:A0A178GVP7"
                     /fasta_file="/home/lisa/Wolbachia_genomes/Genome_seqs/9_wol_genomes.faa:fasta/wFol14700.fasta.out"
                     /blastp_file="uniprot_all.fasta:blastp/wFol14700.out"
     gene            695755..696564
                     /locus_tag="wFol_05900"
     CDS             695755..696564
                     /locus_tag="wFol_05900"
                     /product="Putative phage baseplate assembly protein J"
                     /note="Uniprot:Q73I93"
                     /fasta_file="/home/lisa/Wolbachia_genomes/Genome_seqs/9_wol_genomes.faa:fasta/wFol14690.fasta.out"
                     /blastp_file="uniprot_all.fasta:blastp/wFol14690.out"
     gene            696564..697196
                     /locus_tag="wFol_05910"
                     /note="Putative phage tail protein, truncation"
                     /note="Uniprot:A0A059IUT0"
                     /fasta_file="/home/lisa/Wolbachia_genomes/Genome_seqs/9_wol_genomes.faa:fasta/wFol14680.fasta.out"
                     /blastp_file="uniprot_all.fasta:blastp/wFol14680.out"
                     /pseudo
     gene            complement(697738..699831)
                     /locus_tag="wFol_05920"
     CDS             complement(697738..699831)
                     /locus_tag="wFol_05920"
                     /product="Resolvase"
                     /note="Uniprot:A0A125SIR4"
                     /fasta_file="/home/lisa/Wolbachia_genomes/Genome_seqs/9_wol_genomes.faa:fasta/wFol14670.fasta.out"
                     /blastp_file="uniprot_all.fasta:blastp/wFol14670.out"
     gene            complement(700409..700588)
                     /locus_tag="wFol_05930"
     CDS             complement(700409..700588)
                     /locus_tag="wFol_05930"
                     /product="Uncharacterized protein"
                     /note="Uniprot:A0A0P6P1S6"
                     /fasta_file="/home/lisa/Wolbachia_genomes/Genome_seqs/9_wol_genomes.faa:fasta/wFol14650.fasta.out"
                     /blastp_file="uniprot_all.fasta:blastp/wFol14650.out"
     gene            complement(701113..701424)
                     /locus_tag="wFol_05940"
     CDS             complement(701113..701424)
                     /locus_tag="wFol_05940"
                     /product="Putative phage related protein"
                     /note="Uniprot:A0A0P6NPS7"
                     /fasta_file="/home/lisa/Wolbachia_genomes/Genome_seqs/9_wol_genomes.faa:fasta/wFol14630.fasta.out"
                     /blastp_file="uniprot_all.fasta:blastp/wFol14630.out"
     gene            complement(701491..701994)
                     /locus_tag="wFol_05950"
     CDS             complement(701491..701994)
                     /locus_tag="wFol_05950"
                     /product="Putative phage related protein"
                     /note="Uniprot:B3CNW8"
                     /fasta_file="/home/lisa/Wolbachia_genomes/Genome_seqs/9_wol_genomes.faa:fasta/wFol14620.fasta.out"
                     /blastp_file="uniprot_all.fasta:blastp/wFol14620.out"
     gene            complement(702249..703067)
                     /locus_tag="wFol_05960"
     CDS             complement(702249..703067)
                     /locus_tag="wFol_05960"
                     /product="Presumed DNA repair protein"
                     /note="Uniprot:A0A0P6NTA3"
                     /fasta_file="/home/lisa/Wolbachia_genomes/Genome_seqs/9_wol_genomes.faa:fasta/wFol14600.fasta.out"
                     /blastp_file="uniprot_all.fasta:blastp/wFol14600.out"
     gene            complement(703071..703901)
                     /locus_tag="wFol_05970"
     CDS             complement(703071..703901)
                     /locus_tag="wFol_05970"
                     /product="Presumed phage protein"
                     /note="Uniprot:A0A098AQU3"
                     /fasta_file="/home/lisa/Wolbachia_genomes/Genome_seqs/9_wol_genomes.faa:fasta/wFol14590.fasta.out"
                     /blastp_file="uniprot_all.fasta:blastp/wFol14590.out"
     gene            complement(703898..704443)
                     /locus_tag="wFol_05980"
     CDS             complement(703898..704443)
                     /locus_tag="wFol_05980"
                     /product="Putative phage related protein"
                     /note="Uniprot:B3CPN9"
                     /fasta_file="/home/lisa/Wolbachia_genomes/Genome_seqs/9_wol_genomes.faa:fasta/wFol14580.fasta.out"
                     /blastp_file="uniprot_all.fasta:blastp/wFol14580.out"
     gene            complement(704501..706570)
                     /locus_tag="wFol_05990"
     CDS             complement(704501..706570)
                     /locus_tag="wFol_05990"
                     /product="Putative DNA repair protein"
                     /note="Uniprot:B3CPN8"
                     /fasta_file="/home/lisa/Wolbachia_genomes/Genome_seqs/9_wol_genomes.faa:fasta/wFol14570.fasta.out"
                     /blastp_file="uniprot_all.fasta:blastp/wFol14570.out"
     gene            710197..710868
                     /locus_tag="wFol_06000"
     CDS             710197..710868
                     /locus_tag="wFol_06000"
                     /product="AAA family protein"
                     /note="Uniprot:H0U0Y6"
                     /fasta_file="/home/lisa/Wolbachia_genomes/Genome_seqs/9_wol_genomes.faa:fasta/wFol14560.fasta.out"
                     /blastp_file="uniprot_all.fasta:blastp/wFol14560.out"
     gene            711168..712175
                     /locus_tag="wFol_06010"
     CDS             711168..712175
                     /locus_tag="wFol_06010"
                     /product="Putative virulence protein, RhuM family"
                     /note="Uniprot:A0A0P6NLB6"
                     /fasta_file="/home/lisa/Wolbachia_genomes/Genome_seqs/9_wol_genomes.faa:fasta/wFol14540.fasta.out"
                     /blastp_file="uniprot_all.fasta:blastp/wFol14540.out"
     gene            712200..712688
                     /locus_tag="wFol_06020"
     CDS             712200..712688
                     /locus_tag="wFol_06020"
                     /product="Putative holliday junction resolvase RuvC"
                     /note="Uniprot:A0A059PCS8"
                     /fasta_file="/home/lisa/Wolbachia_genomes/Genome_seqs/9_wol_genomes.faa:fasta/wFol14530.fasta.out"
                     /blastp_file="uniprot_all.fasta:blastp/wFol14530.out"
     gene            712939..714174
                     /locus_tag="wFol_06030"
     CDS             712939..714174
                     /locus_tag="wFol_06030"
                     /product="Phage related DNA methylase"
                     /note="Uniprot:A0A098ASM0"
                     /fasta_file="/home/lisa/Wolbachia_genomes/Genome_seqs/9_wol_genomes.faa:fasta/wFol14520.fasta.out"
                     /blastp_file="uniprot_all.fasta:blastp/wFol14520.out"
     gene            714242..714715
                     /locus_tag="wFol_06040"
     CDS             714242..714715
                     /locus_tag="wFol_06040"
                     /product="Putative phage related protein"
                     /note="Uniprot:A0A059PCT8"
                     /fasta_file="/home/lisa/Wolbachia_genomes/Genome_seqs/9_wol_genomes.faa:fasta/wFol14510.fasta.out"
                     /blastp_file="uniprot_all.fasta:blastp/wFol14510.out"
     gene            714744..716315
                     /locus_tag="wFol_06050"
     CDS             714744..716315
                     /locus_tag="wFol_06050"
                     /product="Ankyrin repeat domain protein"
                     /note="Uniprot:B9A8T7"
                     /fasta_file="/home/lisa/Wolbachia_genomes/Genome_seqs/9_wol_genomes.faa:fasta/wFol14500.fasta.out"
                     /blastp_file="uniprot_all.fasta:blastp/wFol14500.out"
     gene            716312..718141
                     /locus_tag="wFol_06060"
     CDS             716312..718141
                     /locus_tag="wFol_06060"
                     /product="Phage terminase large subunit GpA"
                     /note="Uniprot:B3CNV8"
                     /fasta_file="/home/lisa/Wolbachia_genomes/Genome_seqs/9_wol_genomes.faa:fasta/wFol14490.fasta.out"
                     /blastp_file="uniprot_all.fasta:blastp/wFol14490.out"
     gene            718134..718358
                     /locus_tag="wFol_06070"
     CDS             718134..718358
                     /locus_tag="wFol_06070"
                     /product="GpW-like phage protein"
                     /note="Uniprot:A0A0P6NWM3"
                     /fasta_file="/home/lisa/Wolbachia_genomes/Genome_seqs/9_wol_genomes.faa:fasta/wFol14480.fasta.out"
                     /blastp_file="uniprot_all.fasta:blastp/wFol14480.out"
     gene            718546..719958
                     /locus_tag="wFol_06080"
     CDS             718546..719958
                     /locus_tag="wFol_06080"
                     /product="Putative phage portal protein, lambda family"
                     /note="Uniprot:B3CNV5"
                     /fasta_file="/home/lisa/Wolbachia_genomes/Genome_seqs/9_wol_genomes.faa:fasta/wFol14460.fasta.out"
                     /blastp_file="uniprot_all.fasta:blastp/wFol14460.out"
     gene            719955..721037
                     /locus_tag="wFol_06090"
     CDS             719955..721037
                     /locus_tag="wFol_06090"
                     /product="Putative phage minor capsid protein C"
                     /note="Uniprot:M9WZG7"
                     /fasta_file="/home/lisa/Wolbachia_genomes/Genome_seqs/9_wol_genomes.faa:fasta/wFol14450.fasta.out"
                     /blastp_file="uniprot_all.fasta:blastp/wFol14450.out"
     gene            721146..721514
                     /locus_tag="wFol_06100"
     CDS             721146..721514
                     /locus_tag="wFol_06100"
                     /product="Putative phage head decoration protein D"
                     /note="Uniprot:A0A059PCT9"
                     /fasta_file="/home/lisa/Wolbachia_genomes/Genome_seqs/9_wol_genomes.faa:fasta/wFol14440.fasta.out"
                     /blastp_file="uniprot_all.fasta:blastp/wFol14440.out"
     gene            721560..722561
                     /locus_tag="wFol_06110"
     CDS             721560..722561
                     /locus_tag="wFol_06110"
                     /product="Putative phage major capsid protein E"
                     /note="Uniprot:C0R4U6"
                     /fasta_file="/home/lisa/Wolbachia_genomes/Genome_seqs/9_wol_genomes.faa:fasta/wFol14430.fasta.out"
                     /blastp_file="uniprot_all.fasta:blastp/wFol14430.out"
     gene            722676..722999
                     /locus_tag="wFol_06120"
     CDS             722676..722999
                     /locus_tag="wFol_06120"
                     /product="Putative phage related protein"
                     /note="Uniprot:M9WVS0"
                     /fasta_file="/home/lisa/Wolbachia_genomes/Genome_seqs/9_wol_genomes.faa:fasta/wFol14420.fasta.out"
                     /blastp_file="uniprot_all.fasta:blastp/wFol14420.out"
     gene            722992..723507
                     /locus_tag="wFol_06130"
     CDS             722992..723507
                     /locus_tag="wFol_06130"
                     /product="Putative phage minor tail protein Z"
                     /note="Uniprot:B3CP86"
                     /fasta_file="/home/lisa/Wolbachia_genomes/Genome_seqs/9_wol_genomes.faa:fasta/wFol14410.fasta.out"
                     /blastp_file="uniprot_all.fasta:blastp/wFol14410.out"
     gene            723504..723974
                     /locus_tag="wFol_06140"
     CDS             723504..723974
                     /locus_tag="wFol_06140"
                     /product="Putative phage related protein"
                     /note="Uniprot:B3CP85"
                     /fasta_file="/home/lisa/Wolbachia_genomes/Genome_seqs/9_wol_genomes.faa:fasta/wFol14400.fasta.out"
                     /blastp_file="uniprot_all.fasta:blastp/wFol14400.out"
     gene            723961..724425
                     /locus_tag="wFol_06150"
     CDS             723961..724425
                     /locus_tag="wFol_06150"
                     /product="Phage baseplate assembly protein V"
                     /note="Uniprot:B3CP84"
                     /fasta_file="/home/lisa/Wolbachia_genomes/Genome_seqs/9_wol_genomes.faa:fasta/wFol14390.fasta.out"
                     /blastp_file="uniprot_all.fasta:blastp/wFol14390.out"
     gene            724425..724679
                     /locus_tag="wFol_06160"
     CDS             724425..724679
                     /locus_tag="wFol_06160"
                     /product="PAAR-family protein"
                     /note="Uniprot:Q73I95"
                     /fasta_file="/home/lisa/Wolbachia_genomes/Genome_seqs/9_wol_genomes.faa:fasta/wFol14380.fasta.out"
                     /blastp_file="uniprot_all.fasta:blastp/wFol14380.out"
     gene            724685..725020
                     /locus_tag="wFol_06170"
     CDS             724685..725020
                     /locus_tag="wFol_06170"
                     /product="Putative phage baseplate assembly protein GPW"
                     /note="Uniprot:A0A0U1DAQ7"
                     /fasta_file="/home/lisa/Wolbachia_genomes/Genome_seqs/9_wol_genomes.faa:fasta/wFol14370.fasta.out"
                     /blastp_file="uniprot_all.fasta:blastp/wFol14370.out"
     gene            725023..725826
                     /locus_tag="wFol_06180"
     CDS             725023..725826
                     /locus_tag="wFol_06180"
                     /product="Putative phage baseplate assembly protein J"
                     /note="Uniprot:C0R4T9"
                     /fasta_file="/home/lisa/Wolbachia_genomes/Genome_seqs/9_wol_genomes.faa:fasta/wFol14360.fasta.out"
                     /blastp_file="uniprot_all.fasta:blastp/wFol14360.out"
     gene            725826..726977
                     /locus_tag="wFol_06190"
     CDS             725826..726977
                     /locus_tag="wFol_06190"
                     /product="Putative phage tail protein"
                     /note="Uniprot:Q73I92"
                     /fasta_file="/home/lisa/Wolbachia_genomes/Genome_seqs/9_wol_genomes.faa:fasta/wFol14350.fasta.out"
                     /blastp_file="uniprot_all.fasta:blastp/wFol14350.out"
     gene            727231..727890
                     /locus_tag="wFol_06200"
     CDS             727231..727890
                     /locus_tag="wFol_06200"
                     /product="Ankyrin repeat domain protein"
                     /note="Uniprot:Q73I91"
                     /fasta_file="/home/lisa/Wolbachia_genomes/Genome_seqs/9_wol_genomes.faa:fasta/wFol14340.fasta.out"
                     /blastp_file="uniprot_all.fasta:blastp/wFol14340.out"
     gene            727926..728396
                     /locus_tag="wFol_06210"
     CDS             727926..728396
                     /locus_tag="wFol_06210"
                     /product="Ankyrin repeat domain protein"
                     /note="Uniprot:C0R4T7"
                     /fasta_file="/home/lisa/Wolbachia_genomes/Genome_seqs/9_wol_genomes.faa:fasta/wFol14330.fasta.out"
                     /blastp_file="uniprot_all.fasta:blastp/wFol14330.out"
     gene            728413..728850
                     /locus_tag="wFol_06220"
     CDS             728413..728850
                     /locus_tag="wFol_06220"
                     /product="Uncharacterized protein"
                     /note="Uniprot:W6TU00"
                     /fasta_file="/home/lisa/Wolbachia_genomes/Genome_seqs/9_wol_genomes.faa:fasta/wFol14320.fasta.out"
                     /blastp_file="uniprot_all.fasta:blastp/wFol14320.out"
     gene            728834..730486
                     /locus_tag="wFol_06230"
     CDS             728834..730486
                     /locus_tag="wFol_06230"
                     /product="Resolvase"
                     /note="Uniprot:A0A059PCU0"
                     /fasta_file="/home/lisa/Wolbachia_genomes/Genome_seqs/9_wol_genomes.faa:fasta/wFol14310.fasta.out"
                     /blastp_file="uniprot_all.fasta:blastp/wFol14310.out"
     gene            730699..731325
                     /locus_tag="wFol_06240"
     CDS             730699..731325
                     /locus_tag="wFol_06240"
                     /product="Putative membrane protein"
                     /fasta_file="/home/lisa/Wolbachia_genomes/Genome_seqs/9_wol_genomes.faa:fasta/wFol14290.fasta.out"
                     /blastp_file="uniprot_all.fasta:blastp/wFol14290.out"
     gene            731509..734907
                     /locus_tag="wFol_06250"
     CDS             731509..734907
                     /locus_tag="wFol_06250"
                     /product="Ankyrin repeat domain protein"
                     /note="Uniprot:A0A060PZE7"
                     /fasta_file="/home/lisa/Wolbachia_genomes/Genome_seqs/9_wol_genomes.faa:fasta/wFol14280.fasta.out"
                     /blastp_file="uniprot_all.fasta:blastp/wFol14280.out"
     gene            735037..736257
                     /locus_tag="wFol_06260"
     CDS             735037..736257
                     /locus_tag="wFol_06260"
                     /product="Transposase, IS256 family"
                     /note="no group"
                     /note="Uniprot:B3CNF8"
                     /fasta_file="/home/lisa/Wolbachia_genomes/Genome_seqs/9_wol_genomes.faa:fasta/wFol14270.fasta.out"
                     /blastp_file="uniprot_all.fasta:blastp/wFol14270.out"
     gene            736260..736400
                     /locus_tag="wFol_06270"
     CDS             736260..736400
                     /locus_tag="wFol_06270"
                     /product="Putative membrane protein"
                     /fasta_file="/home/lisa/Wolbachia_genomes/Genome_seqs/9_wol_genomes.faa:fasta/wFol14260.fasta.out"
                     /blastp_file="uniprot_all.fasta:blastp/wFol14260.out"
     gene            736956..739214
                     /locus_tag="wFol_06280"
     CDS             736956..739214
                     /locus_tag="wFol_06280"
                     /product="Ankyrin repeat domain protein"
                     /note="Uniprot:A0A0U1D928"
                     /fasta_file="/home/lisa/Wolbachia_genomes/Genome_seqs/9_wol_genomes.faa:fasta/wFol14250.fasta.out"
                     /blastp_file="uniprot_all.fasta:blastp/wFol14250.out"
     gene            complement(739202..740326)
                     /locus_tag="wFol_06290"
     CDS             complement(739202..740326)
                     /locus_tag="wFol_06290"
                     /product="Transposase, IS4 family"
                     /note="group IS4Sa"
                     /note="Uniprot:A0A0P6NQA5"
                     /fasta_file="/home/lisa/Wolbachia_genomes/Genome_seqs/9_wol_genomes.faa:fasta/wFol14240.fasta.out"
                     /blastp_file="uniprot_all.fasta:blastp/wFol14240.out"
     gene            740381..753889
                     /locus_tag="wFol_06300"
     CDS             740381..753889
                     /locus_tag="wFol_06300"
                     /product="NACHT, latrotoxin and ankyrin repeat domain
                     protein"
                     /note="Uniprot:B6Y9L2"
                     /fasta_file="/home/lisa/Wolbachia_genomes/Genome_seqs/9_wol_genomes.faa:fasta/wFol14230.fasta.out"
                     /blastp_file="uniprot_all.fasta:blastp/wFol14230.out"
     gene            754062..754409
                     /locus_tag="wFol_06310"
     CDS             754062..754409
                     /locus_tag="wFol_06310"
                     /product="Putative phage repressor protein"
                     /note="Uniprot:A0A178GTY0"
                     /fasta_file="/home/lisa/Wolbachia_genomes/Genome_seqs/9_wol_genomes.faa:fasta/wFol14220.fasta.out"
                     /blastp_file="uniprot_all.fasta:blastp/wFol14220.out"
     gene            complement(754406..755467)
                     /locus_tag="wFol_06320"
     CDS             complement(754406..755467)
                     /locus_tag="wFol_06320"
                     /product="Uncharacterized protein"
                     /note="Uniprot:B9A940"
                     /fasta_file="/home/lisa/Wolbachia_genomes/Genome_seqs/9_wol_genomes.faa:fasta/wFol14210.fasta.out"
                     /blastp_file="uniprot_all.fasta:blastp/wFol14210.out"
     gene            755763..756416
                     /locus_tag="wFol_06330"
     CDS             755763..756416
                     /locus_tag="wFol_06330"
                     /product="RadC family protein"
                     /note="Uniprot:A0A0P6NXS9"
                     /gene="radC"
                     /fasta_file="/home/lisa/Wolbachia_genomes/Genome_seqs/9_wol_genomes.faa:fasta/wFol14200.fasta.out"
                     /blastp_file="uniprot_all.fasta:blastp/wFol14200.out"
     gene            756671..757525
                     /locus_tag="wFol_06340"
     CDS             756671..757525
                     /locus_tag="wFol_06340"
                     /product="Transposase, IS110 family"
                     /note="no group"
                     /note="Uniprot:M9WYR7"
                     /fasta_file="/home/lisa/Wolbachia_genomes/Genome_seqs/9_wol_genomes.faa:fasta/wFol14190.fasta.out"
                     /blastp_file="uniprot_all.fasta:blastp/wFol14190.out"
     gene            757501..757833
                     /locus_tag="wFol_06350"
     CDS             757501..757833
                     /locus_tag="wFol_06350"
                     /product="Unique protein"
                     /fasta_file="/home/lisa/Wolbachia_genomes/Genome_seqs/9_wol_genomes.faa:fasta/wFol14180.fasta.out"
                     /blastp_file="uniprot_all.fasta:blastp/wFol14180.out"
     gene            757995..760088
                     /locus_tag="wFol_06360"
     CDS             757995..760088
                     /locus_tag="wFol_06360"
                     /product="Resolvase"
                     /note="Uniprot:A0A125SIR4"
                     /fasta_file="/home/lisa/Wolbachia_genomes/Genome_seqs/9_wol_genomes.faa:fasta/wFol14160.fasta.out"
                     /blastp_file="uniprot_all.fasta:blastp/wFol14160.out"
     gene            complement(760646..761062)
                     /locus_tag="wFol_06370"
                     /note="Putative phage related protein, disrupted by
                     IS-insertion"
                     /note="Uniprot:A0A178GVM2"
                     /fasta_file="/home/lisa/Wolbachia_genomes/Genome_seqs/9_wol_genomes.faa:fasta/wFol14150.fasta.out"
                     /blastp_file="uniprot_all.fasta:blastp/wFol14150.out"
                     /pseudo
     gene            761555..761818
                     /locus_tag="wFol_06380"
     CDS             761555..761818
                     /locus_tag="wFol_06380"
                     /product="Uncharacterized protein"
                     /note="Uniprot:A0A178GSI8"
                     /fasta_file="/home/lisa/Wolbachia_genomes/Genome_seqs/9_wol_genomes.faa:fasta/wFol14140.fasta.out"
                     /blastp_file="uniprot_all.fasta:blastp/wFol14140.out"
     gene            762205..764202
                     /locus_tag="wFol_06390"
     CDS             762205..764202
                     /locus_tag="wFol_06390"
                     /product="Ankyrin repeat domain protein"
                     /fasta_file="/home/lisa/Wolbachia_genomes/Genome_seqs/9_wol_genomes.faa:fasta/wFol14130.fasta.out"
                     /blastp_file="uniprot_all.fasta:blastp/wFol14130.out"
     gene            764272..765813
                     /locus_tag="wFol_06400"
     CDS             764272..765813
                     /locus_tag="wFol_06400"
                     /product="Putative type II secretion system protein"
                     /note="Uniprot:A0A178GTW9"
                     /fasta_file="/home/lisa/Wolbachia_genomes/Genome_seqs/9_wol_genomes.faa:fasta/wFol14120.fasta.out"
                     /blastp_file="uniprot_all.fasta:blastp/wFol14120.out"
     gene            complement(766179..767402)
                     /locus_tag="wFol_06410"
     CDS             complement(766179..767402)
                     /locus_tag="wFol_06410"
                     /product="Membrane-bound protoheme IX biogenesis protein,
                     HemY"
                     /note="Uniprot:M9WTD4"
                     /fasta_file="/home/lisa/Wolbachia_genomes/Genome_seqs/9_wol_genomes.faa:fasta/wFol14110.fasta.out"
                     /blastp_file="uniprot_all.fasta:blastp/wFol14110.out"
     gene            complement(767399..768133)
                     /locus_tag="wFol_06420"
     CDS             complement(767399..768133)
                     /locus_tag="wFol_06420"
                     /product="Putative membrane protein"
                     /note="Uniprot:A0A060Q140"
                     /fasta_file="/home/lisa/Wolbachia_genomes/Genome_seqs/9_wol_genomes.faa:fasta/wFol14100.fasta.out"
                     /blastp_file="uniprot_all.fasta:blastp/wFol14100.out"
     gene            complement(768126..769355)
                     /locus_tag="wFol_06430"
     CDS             complement(768126..769355)
                     /locus_tag="wFol_06430"
                     /product="Lipoprotein releasing system transmembrane
                     protein LolC"
                     /note="Uniprot:A0A060PXB4"
                     /gene="lolC"
                     /fasta_file="/home/lisa/Wolbachia_genomes/Genome_seqs/9_wol_genomes.faa:fasta/wFol14090.fasta.out"
                     /blastp_file="uniprot_all.fasta:blastp/wFol14090.out"
     gene            complement(769492..771711)
                     /locus_tag="wFol_06440"
     CDS             complement(769492..771711)
                     /locus_tag="wFol_06440"
                     /product="Ankyrin repeat domain protein"
                     /fasta_file="/home/lisa/Wolbachia_genomes/Genome_seqs/9_wol_genomes.faa:fasta/wFol14080.fasta.out"
                     /blastp_file="uniprot_all.fasta:blastp/wFol14080.out"
     gene            complement(772157..772631)
                     /locus_tag="wFol_06450"
     CDS             complement(772157..772631)
                     /locus_tag="wFol_06450"
                     /product="Unique protein"
                     /fasta_file="/home/lisa/Wolbachia_genomes/Genome_seqs/9_wol_genomes.faa:fasta/wFol14070.fasta.out"
                     /blastp_file="uniprot_all.fasta:blastp/wFol14070.out"
     gene            complement(772790..774346)
                     /locus_tag="wFol_06460"
     CDS             complement(772790..774346)
                     /locus_tag="wFol_06460"
                     /product="Ankyrin repeat domain protein"
                     /note="Uniprot:A2G327"
                     /fasta_file="/home/lisa/Wolbachia_genomes/Genome_seqs/9_wol_genomes.faa:fasta/wFol14060.fasta.out"
                     /blastp_file="uniprot_all.fasta:blastp/wFol14060.out"
     gene            complement(774430..774690)
                     /locus_tag="wFol_06470"
     CDS             complement(774430..774690)
                     /locus_tag="wFol_06470"
                     /product="Putative membrane protein"
                     /fasta_file="/home/lisa/Wolbachia_genomes/Genome_seqs/9_wol_genomes.faa:fasta/wFol14050.fasta.out"
                     /blastp_file="uniprot_all.fasta:blastp/wFol14050.out"
     gene            775088..776107
                     /locus_tag="wFol_06480"
     CDS             775088..776107
                     /locus_tag="wFol_06480"
                     /product="Putative DNA polymerase III, delta subunit"
                     /note="Uniprot:A0A178GU52"
                     /fasta_file="/home/lisa/Wolbachia_genomes/Genome_seqs/9_wol_genomes.faa:fasta/wFol14030.fasta.out"
                     /blastp_file="uniprot_all.fasta:blastp/wFol14030.out"
     gene            complement(776215..777099)
                     /locus_tag="wFol_06490"
     CDS             complement(776215..777099)
                     /locus_tag="wFol_06490"
                     /product="Aminoglycoside phosphotransferase"
                     /note="Uniprot:A0A090D3G2"
                     /fasta_file="/home/lisa/Wolbachia_genomes/Genome_seqs/9_wol_genomes.faa:fasta/wFol14020.fasta.out"
                     /blastp_file="uniprot_all.fasta:blastp/wFol14020.out"
     gene            complement(777153..777671)
                     /locus_tag="wFol_06500"
     CDS             complement(777153..777671)
                     /locus_tag="wFol_06500"
                     /product="Disulfide bond formation protein, DsbB family"
                     /note="Uniprot:Q73G63"
                     /fasta_file="/home/lisa/Wolbachia_genomes/Genome_seqs/9_wol_genomes.faa:fasta/wFol14010.fasta.out"
                     /blastp_file="uniprot_all.fasta:blastp/wFol14010.out"
     gene            complement(777753..778661)
                     /locus_tag="wFol_06510"
     CDS             complement(777753..778661)
                     /locus_tag="wFol_06510"
                     /product="Methionyl-tRNA formyltransferase"
                     /note="Uniprot:M9X021"
                     /gene="fmt"
                     /fasta_file="/home/lisa/Wolbachia_genomes/Genome_seqs/9_wol_genomes.faa:fasta/wFol14000.fasta.out"
                     /blastp_file="uniprot_all.fasta:blastp/wFol14000.out"
     gene            complement(778701..779066)
                     /locus_tag="wFol_06520"
     CDS             complement(778701..779066)
                     /locus_tag="wFol_06520"
                     /product="50S ribosomal protein L20"
                     /note="Uniprot:M9X0T8"
                     /gene="rplT"
                     /fasta_file="/home/lisa/Wolbachia_genomes/Genome_seqs/9_wol_genomes.faa:fasta/wFol13990.fasta.out"
                     /blastp_file="uniprot_all.fasta:blastp/wFol13990.out"
     gene            complement(779087..779293)
                     /locus_tag="wFol_06530"
     CDS             complement(779087..779293)
                     /locus_tag="wFol_06530"
                     /product="50S ribosomal protein L35"
                     /note="Uniprot:M9WSM1"
                     /gene="rpmI"
                     /fasta_file="/home/lisa/Wolbachia_genomes/Genome_seqs/9_wol_genomes.faa:fasta/wFol13980.fasta.out"
                     /blastp_file="uniprot_all.fasta:blastp/wFol13980.out"
     gene            complement(779392..779832)
                     /locus_tag="wFol_06540"
     CDS             complement(779392..779832)
                     /locus_tag="wFol_06540"
                     /product="PAS domain protein"
                     /note="Uniprot:C0R3S4"
                     /fasta_file="/home/lisa/Wolbachia_genomes/Genome_seqs/9_wol_genomes.faa:fasta/wFol13970.fasta.out"
                     /blastp_file="uniprot_all.fasta:blastp/wFol13970.out"
     gene            complement(779990..780382)
                     /locus_tag="wFol_06550"
     CDS             complement(779990..780382)
                     /locus_tag="wFol_06550"
                     /product="Putative membrane protein"
                     /note="Uniprot:A0A060Q3J5"
                     /fasta_file="/home/lisa/Wolbachia_genomes/Genome_seqs/9_wol_genomes.faa:fasta/wFol13960.fasta.out"
                     /blastp_file="uniprot_all.fasta:blastp/wFol13960.out"
     gene            complement(780385..780909)
                     /locus_tag="wFol_06560"
     CDS             complement(780385..780909)
                     /locus_tag="wFol_06560"
                     /product="Putative membrane protein"
                     /note="Uniprot:A0A060Q3J5"
                     /fasta_file="/home/lisa/Wolbachia_genomes/Genome_seqs/9_wol_genomes.faa:fasta/wFol13950.fasta.out"
                     /blastp_file="uniprot_all.fasta:blastp/wFol13950.out"
     gene            complement(781005..782456)
                     /locus_tag="wFol_06570"
     CDS             complement(781005..782456)
                     /locus_tag="wFol_06570"
                     /product="Trk system potassium uptake protein TrkH"
                     /note="Uniprot:A0A098AT85"
                     /gene="trkH"
                     /fasta_file="/home/lisa/Wolbachia_genomes/Genome_seqs/9_wol_genomes.faa:fasta/wFol13940.fasta.out"
                     /blastp_file="uniprot_all.fasta:blastp/wFol13940.out"
     gene            782656..783507
                     /locus_tag="wFol_06580"
     CDS             782656..783507
                     /locus_tag="wFol_06580"
                     /product="Unique protein"
                     /fasta_file="/home/lisa/Wolbachia_genomes/Genome_seqs/9_wol_genomes.faa:fasta/wFol13930.fasta.out"
                     /blastp_file="uniprot_all.fasta:blastp/wFol13930.out"
     gene            783504..785705
                     /locus_tag="wFol_06590"
     CDS             783504..785705
                     /locus_tag="wFol_06590"
                     /product="DnaJ domain protein"
                     /fasta_file="/home/lisa/Wolbachia_genomes/Genome_seqs/9_wol_genomes.faa:fasta/wFol13920.fasta.out"
                     /blastp_file="uniprot_all.fasta:blastp/wFol13920.out"
     gene            complement(785806..786258)
                     /locus_tag="wFol_06600"
     CDS             complement(785806..786258)
                     /locus_tag="wFol_06600"
                     /product="SWIM zinc finger family protein"
                     /note="Uniprot:M9X1C0"
                     /fasta_file="/home/lisa/Wolbachia_genomes/Genome_seqs/9_wol_genomes.faa:fasta/wFol13910.fasta.out"
                     /blastp_file="uniprot_all.fasta:blastp/wFol13910.out"
     gene            786766..787959
                     /locus_tag="wFol_06610"
     CDS             786766..787959
                     /locus_tag="wFol_06610"
                     /product="Phage portal protein"
                     /note="Uniprot:A0A178GT49"
                     /fasta_file="/home/lisa/Wolbachia_genomes/Genome_seqs/9_wol_genomes.faa:fasta/wFol13900.fasta.out"
                     /blastp_file="uniprot_all.fasta:blastp/wFol13900.out"
     gene            788113..788457
                     /locus_tag="wFol_06620"
     CDS             788113..788457
                     /locus_tag="wFol_06620"
                     /product="TrbC/VIRB2 family protein"
                     /note="Uniprot:A0A178GW75"
                     /fasta_file="/home/lisa/Wolbachia_genomes/Genome_seqs/9_wol_genomes.faa:fasta/wFol13890.fasta.out"
                     /blastp_file="uniprot_all.fasta:blastp/wFol13890.out"
     gene            788690..789121
                     /locus_tag="wFol_06630"
     CDS             788690..789121
                     /locus_tag="wFol_06630"
                     /product="TrbC/VIRB2 family protein"
                     /note="Uniprot:A0A060PVR0"
                     /fasta_file="/home/lisa/Wolbachia_genomes/Genome_seqs/9_wol_genomes.faa:fasta/wFol13880.fasta.out"
                     /blastp_file="uniprot_all.fasta:blastp/wFol13880.out"
     gene            complement(789127..790143)
                     /locus_tag="wFol_06640"
     CDS             complement(789127..790143)
                     /locus_tag="wFol_06640"
                     /product="Putative phosphate ABC transporter, periplasmic
                     phosphate-binding protein"
                     /note="Uniprot:C0R2R6"
                     /fasta_file="/home/lisa/Wolbachia_genomes/Genome_seqs/9_wol_genomes.faa:fasta/wFol13870.fasta.out"
                     /blastp_file="uniprot_all.fasta:blastp/wFol13870.out"
     gene            790591..791163
                     /locus_tag="wFol_06650"
     CDS             790591..791163
                     /locus_tag="wFol_06650"
                     /product="Transposase, IS110 family"
                     /note="no group"
                     /note="Uniprot:C0F949"
                     /fasta_file="/home/lisa/Wolbachia_genomes/Genome_seqs/9_wol_genomes.faa:fasta/wFol13850.fasta.out"
                     /blastp_file="uniprot_all.fasta:blastp/wFol13850.out"
     gene            791169..791558
                     /locus_tag="wFol_06660"
     CDS             791169..791558
                     /locus_tag="wFol_06660"
                     /product="Transposase, IS110 family"
                     /note="no group"
                     /note="Uniprot:C0F949"
                     /fasta_file="/home/lisa/Wolbachia_genomes/Genome_seqs/9_wol_genomes.faa:fasta/wFol13840.fasta.out"
                     /blastp_file="uniprot_all.fasta:blastp/wFol13840.out"
     gene            791757..792881
                     /locus_tag="wFol_06670"
     CDS             791757..792881
                     /locus_tag="wFol_06670"
                     /product="Transposase, IS4 family"
                     /note="group IS4Sa"
                     /note="Uniprot:A0A0P6NQA5"
                     /fasta_file="/home/lisa/Wolbachia_genomes/Genome_seqs/9_wol_genomes.faa:fasta/wFol13830.fasta.out"
                     /blastp_file="uniprot_all.fasta:blastp/wFol13830.out"
     gene            793019..794170
                     /locus_tag="wFol_06680"
     CDS             793019..794170
                     /locus_tag="wFol_06680"
                     /product="Pseudouridylate synthase, TruB family"
                     /note="Uniprot:M9WRJ4"
                     /fasta_file="/home/lisa/Wolbachia_genomes/Genome_seqs/9_wol_genomes.faa:fasta/wFol13820.fasta.out"
                     /blastp_file="uniprot_all.fasta:blastp/wFol13820.out"
     gene            794187..794459
                     /locus_tag="wFol_06690"
     CDS             794187..794459
                     /locus_tag="wFol_06690"
                     /product="30S ribosomal protein S15"
                     /note="Uniprot:M9WSN0"
                     /gene="rpsO"
                     /fasta_file="/home/lisa/Wolbachia_genomes/Genome_seqs/9_wol_genomes.faa:fasta/wFol13810.fasta.out"
                     /blastp_file="uniprot_all.fasta:blastp/wFol13810.out"
     gene            794474..796759
                     /locus_tag="wFol_06700"
     CDS             794474..796759
                     /locus_tag="wFol_06700"
                     /product="Polyribonucleotide nucleotidyltransferase"
                     /note="Uniprot:A0A098AS63"
                     /gene="pnp"
                     /fasta_file="/home/lisa/Wolbachia_genomes/Genome_seqs/9_wol_genomes.faa:fasta/wFol13800.fasta.out"
                     /blastp_file="uniprot_all.fasta:blastp/wFol13800.out"
     gene            796959..797261
                     /locus_tag="wFol_06710"
     CDS             796959..797261
                     /locus_tag="wFol_06710"
                     /product="Putative NADH-quinone oxidoreductase"
                     /note="Uniprot:A0A178GS14"
                     /fasta_file="/home/lisa/Wolbachia_genomes/Genome_seqs/9_wol_genomes.faa:fasta/wFol13790.fasta.out"
                     /blastp_file="uniprot_all.fasta:blastp/wFol13790.out"
     gene            797383..797685
                     /locus_tag="wFol_06720"
     CDS             797383..797685
                     /locus_tag="wFol_06720"
                     /product="Uncharacterized protein"
                     /note="Uniprot:C0R4T3"
                     /fasta_file="/home/lisa/Wolbachia_genomes/Genome_seqs/9_wol_genomes.faa:fasta/wFol13780.fasta.out"
                     /blastp_file="uniprot_all.fasta:blastp/wFol13780.out"
     gene            complement(797694..799376)
                     /locus_tag="wFol_06730"
     CDS             complement(797694..799376)
                     /locus_tag="wFol_06730"
                     /product="Penicillin-binding protein"
                     /note="Uniprot:A0A178GT47"
                     /fasta_file="/home/lisa/Wolbachia_genomes/Genome_seqs/9_wol_genomes.faa:fasta/wFol13770.fasta.out"
                     /blastp_file="uniprot_all.fasta:blastp/wFol13770.out"
     gene            799397..800332
                     /locus_tag="wFol_06740"
     CDS             799397..800332
                     /locus_tag="wFol_06740"
                     /product="4-hydroxy-3-methylbut-2-enyl diphosphate
                     reductase"
                     /note="Uniprot:A0A178GTD0"
                     /gene="ispH"
                     /fasta_file="/home/lisa/Wolbachia_genomes/Genome_seqs/9_wol_genomes.faa:fasta/wFol13760.fasta.out"
                     /blastp_file="uniprot_all.fasta:blastp/wFol13760.out"
     gene            complement(800681..801787)
                     /locus_tag="wFol_06750"
     CDS             complement(800681..801787)
                     /locus_tag="wFol_06750"
                     /product="D-alanyl-D-alanine carboxypeptidase"
                     /note="Uniprot:A0A060PZ61"
                     /fasta_file="/home/lisa/Wolbachia_genomes/Genome_seqs/9_wol_genomes.faa:fasta/wFol13750.fasta.out"
                     /blastp_file="uniprot_all.fasta:blastp/wFol13750.out"
     gene            802088..803296
                     /locus_tag="wFol_06760"
     CDS             802088..803296
                     /locus_tag="wFol_06760"
                     /product="Ankyrin repeat domain protein"
                     /note="Uniprot:C0R3I4"
                     /fasta_file="/home/lisa/Wolbachia_genomes/Genome_seqs/9_wol_genomes.faa:fasta/wFol13730.fasta.out"
                     /blastp_file="uniprot_all.fasta:blastp/wFol13730.out"
     gene            803343..803873
                     /locus_tag="wFol_06770"
     CDS             803343..803873
                     /locus_tag="wFol_06770"
                     /product="Hexapeptide transferase family protein"
                     /note="Uniprot:A0A178GV39"
                     /fasta_file="/home/lisa/Wolbachia_genomes/Genome_seqs/9_wol_genomes.faa:fasta/wFol13720.fasta.out"
                     /blastp_file="uniprot_all.fasta:blastp/wFol13720.out"
     gene            complement(803892..804404)
                     /locus_tag="wFol_06780"
     CDS             complement(803892..804404)
                     /locus_tag="wFol_06780"
                     /product="Putative vitamin uptake transporter"
                     /note="Uniprot:A0A098AT51"
                     /fasta_file="/home/lisa/Wolbachia_genomes/Genome_seqs/9_wol_genomes.faa:fasta/wFol13710.fasta.out"
                     /blastp_file="uniprot_all.fasta:blastp/wFol13710.out"
     gene            805472..805897
                     /locus_tag="wFol_06790"
     CDS             805472..805897
                     /locus_tag="wFol_06790"
                     /product="Transposase, IS5 family"
                     /note="group IS903"
                     /note="Uniprot:M9WXK7"
                     /fasta_file="/home/lisa/Wolbachia_genomes/Genome_seqs/9_wol_genomes.faa:fasta/wFol13690.fasta.out"
                     /blastp_file="uniprot_all.fasta:blastp/wFol13690.out"
     gene            805930..806430
                     /locus_tag="wFol_06800"
     CDS             805930..806430
                     /locus_tag="wFol_06800"
                     /product="Transposase, IS5 family"
                     /note="group IS903"
                     /note="Uniprot:Q4EBW8"
                     /fasta_file="/home/lisa/Wolbachia_genomes/Genome_seqs/9_wol_genomes.faa:fasta/wFol13680.fasta.out"
                     /blastp_file="uniprot_all.fasta:blastp/wFol13680.out"
     gene            complement(806475..807266)
                     /locus_tag="wFol_06810"
     CDS             complement(806475..807266)
                     /locus_tag="wFol_06810"
                     /product="Transposase, IS5 family"
                     /note="group IS903"
                     /note="Uniprot:A0A098AQT6"
                     /fasta_file="/home/lisa/Wolbachia_genomes/Genome_seqs/9_wol_genomes.faa:fasta/wFol13670.fasta.out"
                     /blastp_file="uniprot_all.fasta:blastp/wFol13670.out"
     gene            807757..811089
                     /locus_tag="wFol_06820"
     CDS             807757..811089
                     /locus_tag="wFol_06820"
                     /product="Phage host specificity protein"
                     /note="Uniprot:C0R2R4"
                     /note="Uniprot:Q4E918"
                     /fasta_file="/home/lisa/Wolbachia_genomes/Genome_seqs/9_wol_genomes.faa:fasta/wFol13660.fasta.out"
                     /fasta_file="/home/lisa/Wolbachia_genomes/Genome_seqs/9_wol_genomes.faa:fasta/wFol13650.fasta.out"
                     /blastp_file="uniprot_all.fasta:blastp/wFol13660.out"
                     /blastp_file="uniprot_all.fasta:blastp/wFol13650.out"
     gene            complement(811190..812314)
                     /locus_tag="wFol_06830"
     CDS             complement(811190..812314)
                     /locus_tag="wFol_06830"
                     /product="Transposase, IS4 family"
                     /note="group IS4Sa"
                     /note="Uniprot:A0A0P6NQA5"
                     /fasta_file="/home/lisa/Wolbachia_genomes/Genome_seqs/9_wol_genomes.faa:fasta/wFol13640.fasta.out"
                     /blastp_file="uniprot_all.fasta:blastp/wFol13640.out"
     gene            complement(812872..813468)
                     /locus_tag="wFol_06840"
     CDS             complement(812872..813468)
                     /locus_tag="wFol_06840"
                     /product="Uncharacterized protein"
                     /note="Uniprot:Q73FL7"
                     /fasta_file="/home/lisa/Wolbachia_genomes/Genome_seqs/9_wol_genomes.faa:fasta/wFol13620.fasta.out"
                     /blastp_file="uniprot_all.fasta:blastp/wFol13620.out"
     gene            813887..814846
                     /locus_tag="wFol_06850"
     CDS             813887..814846
                     /locus_tag="wFol_06850"
                     /product="Transposase, IS110 family"
                     /note="no group"
                     /note="Uniprot:C0F949"
                     /fasta_file="/home/lisa/Wolbachia_genomes/Genome_seqs/9_wol_genomes.faa:fasta/wFol13600.fasta.out"
                     /blastp_file="uniprot_all.fasta:blastp/wFol13600.out"
     gene            complement(815185..816006)
                     /locus_tag="wFol_06860"
     CDS             complement(815185..816006)
                     /locus_tag="wFol_06860"
                     /product="Uncharacterized protein"
                     /note="Uniprot:Q73HT3"
                     /fasta_file="/home/lisa/Wolbachia_genomes/Genome_seqs/9_wol_genomes.faa:fasta/wFol13590.fasta.out"
                     /blastp_file="uniprot_all.fasta:blastp/wFol13590.out"
     gene            complement(816105..816788)
                     /locus_tag="wFol_06870"
     CDS             complement(816105..816788)
                     /locus_tag="wFol_06870"
                     /product="Orotidine 5'-phosphate decarboxylase"
                     /note="Uniprot:A0A060Q4L2"
                     /gene="pyrF"
                     /fasta_file="/home/lisa/Wolbachia_genomes/Genome_seqs/9_wol_genomes.faa:fasta/wFol13580.fasta.out"
                     /blastp_file="uniprot_all.fasta:blastp/wFol13580.out"
     gene            complement(816785..817591)
                     /locus_tag="wFol_06880"
     CDS             complement(816785..817591)
                     /locus_tag="wFol_06880"
                     /product="Putative membrane protein"
                     /note="Uniprot:A0A060Q014"
                     /fasta_file="/home/lisa/Wolbachia_genomes/Genome_seqs/9_wol_genomes.faa:fasta/wFol13570.fasta.out"
                     /blastp_file="uniprot_all.fasta:blastp/wFol13570.out"
     gene            complement(817694..820177)
                     /locus_tag="wFol_06890"
     CDS             complement(817694..820177)
                     /locus_tag="wFol_06890"
                     /product="Valine--tRNA ligase"
                     /note="Uniprot:C0R5Q9"
                     /gene="valS"
                     /fasta_file="/home/lisa/Wolbachia_genomes/Genome_seqs/9_wol_genomes.faa:fasta/wFol13560.fasta.out"
                     /blastp_file="uniprot_all.fasta:blastp/wFol13560.out"
     gene            820322..822373
                     /locus_tag="wFol_06900"
     CDS             820322..822373
                     /locus_tag="wFol_06900"
                     /product="Tetratricopeptide repeat domain protein"
                     /fasta_file="/home/lisa/Wolbachia_genomes/Genome_seqs/9_wol_genomes.faa:fasta/wFol13550.fasta.out"
                     /blastp_file="uniprot_all.fasta:blastp/wFol13550.out"
     gene            complement(822441..823214)
                     /locus_tag="wFol_06910"
     CDS             complement(822441..823214)
                     /locus_tag="wFol_06910"
                     /product="Uncharacterized protein"
                     /note="Uniprot:A0A098ARF6"
                     /fasta_file="/home/lisa/Wolbachia_genomes/Genome_seqs/9_wol_genomes.faa:fasta/wFol13540.fasta.out"
                     /blastp_file="uniprot_all.fasta:blastp/wFol13540.out"
     misc_feature    822441..825973
                     /locus_tag="possible phage region"
     gene            complement(823267..823656)
                     /locus_tag="wFol_06920"
     CDS             complement(823267..823656)
                     /locus_tag="wFol_06920"
                     /product="Putative phage major tail protein, TP901-1
                     family"
                     /note="Uniprot:C0R587"
                     /fasta_file="/home/lisa/Wolbachia_genomes/Genome_seqs/9_wol_genomes.faa:fasta/wFol13530.fasta.out"
                     /blastp_file="uniprot_all.fasta:blastp/wFol13530.out"
     gene            complement(823631..824041)
                     /locus_tag="wFol_06930"
     CDS             complement(823631..824041)
                     /locus_tag="wFol_06930"
                     /product="Uncharacterized protein"
                     /note="Uniprot:C0FA16"
                     /fasta_file="/home/lisa/Wolbachia_genomes/Genome_seqs/9_wol_genomes.faa:fasta/wFol13520.fasta.out"
                     /blastp_file="uniprot_all.fasta:blastp/wFol13520.out"
     gene            complement(824072..824602)
                     /locus_tag="wFol_06940"
     CDS             complement(824072..824602)
                     /locus_tag="wFol_06940"
                     /product="Putative phage head-tail connector protein"
                     /note="Uniprot:M9WYI3"
                     /fasta_file="/home/lisa/Wolbachia_genomes/Genome_seqs/9_wol_genomes.faa:fasta/wFol13510.fasta.out"
                     /blastp_file="uniprot_all.fasta:blastp/wFol13510.out"
     gene            825224..825973
                     /locus_tag="wFol_06950"
     CDS             825224..825973
                     /locus_tag="wFol_06950"
                     /product="Transposase, IS5 family"
                     /note="group IS427"
                     /note="Uniprot:A0A178GTR6"
                     /fasta_file="/home/lisa/Wolbachia_genomes/Genome_seqs/9_wol_genomes.faa:fasta/wFol13500.fasta.out"
                     /blastp_file="uniprot_all.fasta:blastp/wFol13500.out"
     gene            complement(826659..828779)
                     /locus_tag="wFol_06960"
     CDS             complement(826659..828779)
                     /locus_tag="wFol_06960"
                     /product="Cell division protein FtsK"
                     /note="Uniprot:C0F960"
                     /gene="ftsK"
                     /fasta_file="/home/lisa/Wolbachia_genomes/Genome_seqs/9_wol_genomes.faa:fasta/wFol13480.fasta.out"
                     /blastp_file="uniprot_all.fasta:blastp/wFol13480.out"
     gene            complement(828780..829058)
                     /locus_tag="wFol_06970"
     CDS             complement(828780..829058)
                     /locus_tag="wFol_06970"
                     /product="YGGT family protein"
                     /note="Uniprot:Q73IN6"
                     /fasta_file="/home/lisa/Wolbachia_genomes/Genome_seqs/9_wol_genomes.faa:fasta/wFol13470.fasta.out"
                     /blastp_file="uniprot_all.fasta:blastp/wFol13470.out"
     gene            829238..829768
                     /locus_tag="wFol_06980"
     CDS             829238..829768
                     /locus_tag="wFol_06980"
                     /product="Uncharacterized protein"
                     /note="Uniprot:A0A178GTP5"
                     /fasta_file="/home/lisa/Wolbachia_genomes/Genome_seqs/9_wol_genomes.faa:fasta/wFol13460.fasta.out"
                     /blastp_file="uniprot_all.fasta:blastp/wFol13460.out"
     gene            complement(829947..831071)
                     /locus_tag="wFol_06990"
     CDS             complement(829947..831071)
                     /locus_tag="wFol_06990"
                     /product="Transposase, IS4 family"
                     /note="group IS4Sa"
                     /note="Uniprot:A0A0P6NQA5"
                     /fasta_file="/home/lisa/Wolbachia_genomes/Genome_seqs/9_wol_genomes.faa:fasta/wFol13450.fasta.out"
                     /blastp_file="uniprot_all.fasta:blastp/wFol13450.out"
     gene            complement(831246..832640)
                     /locus_tag="wFol_07000"
     CDS             complement(831246..832640)
                     /locus_tag="wFol_07000"
                     /product="Amidophosphoribosyltransferase"
                     /note="Uniprot:M9WXU5"
                     /gene="purF"
                     /fasta_file="/home/lisa/Wolbachia_genomes/Genome_seqs/9_wol_genomes.faa:fasta/wFol13440.fasta.out"
                     /blastp_file="uniprot_all.fasta:blastp/wFol13440.out"
     gene            complement(832779..833945)
                     /locus_tag="wFol_07010"
     CDS             complement(832779..833945)
                     /locus_tag="wFol_07010"
                     /product="Aspartokinase"
                     /note="Uniprot:C0R3Y5"
                     /gene="lysC"
                     /fasta_file="/home/lisa/Wolbachia_genomes/Genome_seqs/9_wol_genomes.faa:fasta/wFol13430.fasta.out"
                     /blastp_file="uniprot_all.fasta:blastp/wFol13430.out"
     gene            complement(834046..834492)
                     /locus_tag="wFol_07020"
     CDS             complement(834046..834492)
                     /locus_tag="wFol_07020"
                     /product="tRNA-specific adenosine deaminase"
                     /note="Uniprot:A0A060PXV7"
                     /gene="codA"
                     /fasta_file="/home/lisa/Wolbachia_genomes/Genome_seqs/9_wol_genomes.faa:fasta/wFol13420.fasta.out"
                     /blastp_file="uniprot_all.fasta:blastp/wFol13420.out"
     gene            complement(834493..834834)
                     /locus_tag="wFol_07030"
     CDS             complement(834493..834834)
                     /locus_tag="wFol_07030"
                     /product="Unique protein"
                     /fasta_file="/home/lisa/Wolbachia_genomes/Genome_seqs/9_wol_genomes.faa:fasta/wFol13410.fasta.out"
                     /blastp_file="uniprot_all.fasta:blastp/wFol13410.out"
     gene            complement(834871..836478)
                     /locus_tag="wFol_07040"
     CDS             complement(834871..836478)
                     /locus_tag="wFol_07040"
                     /product="CTP synthase"
                     /note="Uniprot:Q73HS5"
                     /gene="pyrG"
                     /fasta_file="/home/lisa/Wolbachia_genomes/Genome_seqs/9_wol_genomes.faa:fasta/wFol13400.fasta.out"
                     /blastp_file="uniprot_all.fasta:blastp/wFol13400.out"
     gene            complement(836478..836798)
                     /locus_tag="wFol_07050"
     CDS             complement(836478..836798)
                     /locus_tag="wFol_07050"
                     /product="Preprotein translocase, SecG subunit"
                     /note="Uniprot:M9WYX2"
                     /gene="secG"
                     /fasta_file="/home/lisa/Wolbachia_genomes/Genome_seqs/9_wol_genomes.faa:fasta/wFol13390.fasta.out"
                     /blastp_file="uniprot_all.fasta:blastp/wFol13390.out"
     gene            837332..840793
                     /locus_tag="wFol_07060"
     CDS             837332..840793
                     /locus_tag="wFol_07060"
                     /product="Isoleucine--tRNA ligase"
                     /note="Uniprot:A0A178GW43"
                     /gene="ileS"
                     /fasta_file="/home/lisa/Wolbachia_genomes/Genome_seqs/9_wol_genomes.faa:fasta/wFol13370.fasta.out"
                     /blastp_file="uniprot_all.fasta:blastp/wFol13370.out"
     gene            complement(841014..841769)
                     /locus_tag="wFol_07070"
     CDS             complement(841014..841769)
                     /locus_tag="wFol_07070"
                     /product="Sec-independent protein translocase protein
                     TatC"
                     /note="Uniprot:C0R5P9"
                     /gene="tatC"
                     /fasta_file="/home/lisa/Wolbachia_genomes/Genome_seqs/9_wol_genomes.faa:fasta/wFol13360.fasta.out"
                     /blastp_file="uniprot_all.fasta:blastp/wFol13360.out"
     gene            complement(841766..842845)
                     /locus_tag="wFol_07080"
     CDS             complement(841766..842845)
                     /locus_tag="wFol_07080"
                     /product="Glyceraldehyde-3-phosphate dehydrogenase"
                     /note="Uniprot:A0A178GVF3"
                     /gene="gap"
                     /fasta_file="/home/lisa/Wolbachia_genomes/Genome_seqs/9_wol_genomes.faa:fasta/wFol13350.fasta.out"
                     /blastp_file="uniprot_all.fasta:blastp/wFol13350.out"
     gene            complement(843142..844113)
                     /locus_tag="wFol_07090"
     CDS             complement(843142..844113)
                     /locus_tag="wFol_07090"
                     /product="Transposase, IS481 family"
                     /note="no group"
                     /note="Uniprot:A0A0D7PAZ1"
                     /fasta_file="/home/lisa/Wolbachia_genomes/Genome_seqs/9_wol_genomes.faa:fasta/wFol13340.fasta.out"
                     /blastp_file="uniprot_all.fasta:blastp/wFol13340.out"
     gene            844561..844857
                     /locus_tag="wFol_07100"
     CDS             844561..844857
                     /locus_tag="wFol_07100"
                     /product="Transposase, IS982 family"
                     /note="no group"
                     /note="Uniprot:B6Y6Y7"
                     /fasta_file="/home/lisa/Wolbachia_genomes/Genome_seqs/9_wol_genomes.faa:fasta/wFol13330.fasta.out"
                     /blastp_file="uniprot_all.fasta:blastp/wFol13330.out"
     gene            845226..846695
                     /locus_tag="wFol_07110"
     CDS             845226..846695
                     /locus_tag="wFol_07110"
                     /product="Probable cytosol aminopeptidase"
                     /note="Uniprot:C0FA96"
                     /gene="pepA"
                     /fasta_file="/home/lisa/Wolbachia_genomes/Genome_seqs/9_wol_genomes.faa:fasta/wFol13320.fasta.out"
                     /blastp_file="uniprot_all.fasta:blastp/wFol13320.out"
     gene            846707..847684
                     /locus_tag="wFol_07120"
     CDS             846707..847684
                     /locus_tag="wFol_07120"
                     /product="Putative quinone oxidoreductase"
                     /note="Uniprot:B3CM07"
                     /fasta_file="/home/lisa/Wolbachia_genomes/Genome_seqs/9_wol_genomes.faa:fasta/wFol13310.fasta.out"
                     /blastp_file="uniprot_all.fasta:blastp/wFol13310.out"
     gene            847816..848919
                     /locus_tag="wFol_07130"
     CDS             847816..848919
                     /locus_tag="wFol_07130"
                     /product="Putative membrane protein"
                     /fasta_file="/home/lisa/Wolbachia_genomes/Genome_seqs/9_wol_genomes.faa:fasta/wFol13300.fasta.out"
                     /blastp_file="uniprot_all.fasta:blastp/wFol13300.out"
     gene            848965..850140
                     /locus_tag="wFol_07140"
     CDS             848965..850140
                     /locus_tag="wFol_07140"
                     /product="Acetylornithine aminotransferase"
                     /note="Uniprot:A0A178GTP7"
                     /gene="argD"
                     /fasta_file="/home/lisa/Wolbachia_genomes/Genome_seqs/9_wol_genomes.faa:fasta/wFol13290.fasta.out"
                     /blastp_file="uniprot_all.fasta:blastp/wFol13290.out"
     gene            850371..851519
                     /locus_tag="wFol_07150"
     CDS             850371..851519
                     /locus_tag="wFol_07150"
                     /product="Ankyrin repeat domain protein"
                     /fasta_file="/home/lisa/Wolbachia_genomes/Genome_seqs/9_wol_genomes.faa:fasta/wFol13280.fasta.out"
                     /blastp_file="uniprot_all.fasta:blastp/wFol13280.out"
     gene            851606..852433
                     /locus_tag="wFol_07160"
     CDS             851606..852433
                     /locus_tag="wFol_07160"
                     /product="Ankyrin repeat domain protein"
                     /note="Uniprot:A0A178GT25"
                     /fasta_file="/home/lisa/Wolbachia_genomes/Genome_seqs/9_wol_genomes.faa:fasta/wFol13270.fasta.out"
                     /blastp_file="uniprot_all.fasta:blastp/wFol13270.out"
     gene            852493..854199
                     /locus_tag="wFol_07170"
     CDS             852493..854199
                     /locus_tag="wFol_07170"
                     /product="Arginine--tRNA ligase"
                     /note="Uniprot:M9WZC9"
                     /gene="argS"
                     /fasta_file="/home/lisa/Wolbachia_genomes/Genome_seqs/9_wol_genomes.faa:fasta/wFol13260.fasta.out"
                     /blastp_file="uniprot_all.fasta:blastp/wFol13260.out"
     gene            854255..855103
                     /locus_tag="wFol_07180"
     CDS             854255..855103
                     /locus_tag="wFol_07180"
                     /product="Ankyrin repeat domain protein"
                     /note="Uniprot:A0A178GT25"
                     /fasta_file="/home/lisa/Wolbachia_genomes/Genome_seqs/9_wol_genomes.faa:fasta/wFol13250.fasta.out"
                     /blastp_file="uniprot_all.fasta:blastp/wFol13250.out"
     gene            855205..856518
                     /locus_tag="wFol_07190"
     CDS             855205..856518
                     /locus_tag="wFol_07190"
                     /product="Ankyrin repeat domain protein"
                     /fasta_file="/home/lisa/Wolbachia_genomes/Genome_seqs/9_wol_genomes.faa:fasta/wFol13240.fasta.out"
                     /blastp_file="uniprot_all.fasta:blastp/wFol13240.out"
     gene            856618..858030
                     /locus_tag="wFol_07200"
     CDS             856618..858030
                     /locus_tag="wFol_07200"
                     /product="Ankyrin repeat domain protein"
                     /note="Uniprot:H2BL46"
                     /fasta_file="/home/lisa/Wolbachia_genomes/Genome_seqs/9_wol_genomes.faa:fasta/wFol13230.fasta.out"
                     /blastp_file="uniprot_all.fasta:blastp/wFol13230.out"
     gene            858129..859763
                     /locus_tag="wFol_07210"
     CDS             858129..859763
                     /locus_tag="wFol_07210"
                     /product="Ankyrin repeat domain protein"
                     /note="Uniprot:K1Q070"
                     /fasta_file="/home/lisa/Wolbachia_genomes/Genome_seqs/9_wol_genomes.faa:fasta/wFol13220.fasta.out"
                     /blastp_file="uniprot_all.fasta:blastp/wFol13220.out"
     gene            859883..860803
                     /locus_tag="wFol_07220"
     CDS             859883..860803
                     /locus_tag="wFol_07220"
                     /product="Pseudouridine synthase"
                     /note="Uniprot:M9WU50"
                     /fasta_file="/home/lisa/Wolbachia_genomes/Genome_seqs/9_wol_genomes.faa:fasta/wFol13210.fasta.out"
                     /blastp_file="uniprot_all.fasta:blastp/wFol13210.out"
     gene            861468..862235
                     /locus_tag="wFol_07230"
     CDS             861468..862235
                     /locus_tag="wFol_07230"
                     /product="Ankyrin repeat domain protein"
                     /note="Uniprot:A0A178GVA6"
                     /fasta_file="/home/lisa/Wolbachia_genomes/Genome_seqs/9_wol_genomes.faa:fasta/wFol13190.fasta.out"
                     /blastp_file="uniprot_all.fasta:blastp/wFol13190.out"
     gene            complement(862446..862613)
                     /locus_tag="wFol_07240"
     CDS             complement(862446..862613)
                     /locus_tag="wFol_07240"
                     /product="Sec-independent protein translocase protein
                     TatA"
                     /note="Uniprot:Q4E9K3"
                     /gene="tatA"
                     /fasta_file="/home/lisa/Wolbachia_genomes/Genome_seqs/9_wol_genomes.faa:fasta/wFol13180.fasta.out"
                     /blastp_file="uniprot_all.fasta:blastp/wFol13180.out"
     gene            complement(862789..863337)
                     /locus_tag="wFol_07250"
     CDS             complement(862789..863337)
                     /locus_tag="wFol_07250"
                     /product="Protein GrpE"
                     /note="Uniprot:A0A098ATV2"
                     /gene="grpE"
                     /fasta_file="/home/lisa/Wolbachia_genomes/Genome_seqs/9_wol_genomes.faa:fasta/wFol13170.fasta.out"
                     /blastp_file="uniprot_all.fasta:blastp/wFol13170.out"
     gene            complement(863399..864385)
                     /locus_tag="wFol_07260"
     CDS             complement(863399..864385)
                     /locus_tag="wFol_07260"
                     /product="Octaprenyl-diphosphate synthase"
                     /note="Uniprot:A0A178GW17"
                     /gene="ispB"
                     /fasta_file="/home/lisa/Wolbachia_genomes/Genome_seqs/9_wol_genomes.faa:fasta/wFol13160.fasta.out"
                     /blastp_file="uniprot_all.fasta:blastp/wFol13160.out"
     gene            complement(864395..864700)
                     /locus_tag="wFol_07270"
     CDS             complement(864395..864700)
                     /locus_tag="wFol_07270"
                     /product="30S ribosomal protein S16"
                     /note="Uniprot:I7IAA4"
                     /gene="rpsP"
                     /fasta_file="/home/lisa/Wolbachia_genomes/Genome_seqs/9_wol_genomes.faa:fasta/wFol13150.fasta.out"
                     /blastp_file="uniprot_all.fasta:blastp/wFol13150.out"
     gene            864892..865362
                     /locus_tag="wFol_07280"
     CDS             864892..865362
                     /locus_tag="wFol_07280"
                     /product="Uncharacterized protein"
                     /note="Uniprot:A0A176Q5J8"
                     /fasta_file="/home/lisa/Wolbachia_genomes/Genome_seqs/9_wol_genomes.faa:fasta/wFol13140.fasta.out"
                     /blastp_file="uniprot_all.fasta:blastp/wFol13140.out"
     gene            complement(865439..865933)
                     /locus_tag="wFol_07290"
     CDS             complement(865439..865933)
                     /locus_tag="wFol_07290"
                     /product="Ankyrin repeat domain protein"
                     /fasta_file="/home/lisa/Wolbachia_genomes/Genome_seqs/9_wol_genomes.faa:fasta/wFol13130.fasta.out"
                     /blastp_file="uniprot_all.fasta:blastp/wFol13130.out"
     gene            866083..866991
                     /locus_tag="wFol_07300"
     CDS             866083..866991
                     /locus_tag="wFol_07300"
                     /product="Transposase, PD-(D/E)XK nuclease family"
                     /note="Uniprot:A0A178GTD1"
                     /fasta_file="/home/lisa/Wolbachia_genomes/Genome_seqs/9_wol_genomes.faa:fasta/wFol13120.fasta.out"
                     /blastp_file="uniprot_all.fasta:blastp/wFol13120.out"
     gene            complement(867670..868098)
                     /locus_tag="wFol_07310"
     CDS             complement(867670..868098)
                     /locus_tag="wFol_07310"
                     /product="Predicted integral membrane protein"
                     /note="Uniprot:A0A176Q8Z4"
                     /fasta_file="/home/lisa/Wolbachia_genomes/Genome_seqs/9_wol_genomes.faa:fasta/wFol13100.fasta.out"
                     /blastp_file="uniprot_all.fasta:blastp/wFol13100.out"
     gene            868166..869137
                     /locus_tag="wFol_07320"
     CDS             868166..869137
                     /locus_tag="wFol_07320"
                     /product="Pyruvate dehydrogenase E1 component subunit
                     alpha"
                     /note="Uniprot:Q73HX3"
                     /gene="pdhA"
                     /fasta_file="/home/lisa/Wolbachia_genomes/Genome_seqs/9_wol_genomes.faa:fasta/wFol13090.fasta.out"
                     /blastp_file="uniprot_all.fasta:blastp/wFol13090.out"
     gene            869191..870051
                     /locus_tag="wFol_07330"
     CDS             869191..870051
                     /locus_tag="wFol_07330"
                     /product="Putative membrane protein"
                     /note="Uniprot:A0A176Q5J8"
                     /fasta_file="/home/lisa/Wolbachia_genomes/Genome_seqs/9_wol_genomes.faa:fasta/wFol13080.fasta.out"
                     /blastp_file="uniprot_all.fasta:blastp/wFol13080.out"
     gene            870538..871641
                     /locus_tag="wFol_07340"
     CDS             870538..871641
                     /locus_tag="wFol_07340"
                     /product="PQQ enzyme repeat family protein"
                     /note="Uniprot:C0R3I7"
                     /fasta_file="/home/lisa/Wolbachia_genomes/Genome_seqs/9_wol_genomes.faa:fasta/wFol13060.fasta.out"
                     /blastp_file="uniprot_all.fasta:blastp/wFol13060.out"
     gene            871634..873025
                     /locus_tag="wFol_07350"
     CDS             871634..873025
                     /locus_tag="wFol_07350"
                     /product="Dihydrolipoyl dehydrogenase"
                     /note="Uniprot:A0A0P6NLS3"
                     /gene="lpdA"
                     /fasta_file="/home/lisa/Wolbachia_genomes/Genome_seqs/9_wol_genomes.faa:fasta/wFol13050.fasta.out"
                     /blastp_file="uniprot_all.fasta:blastp/wFol13050.out"
     gene            873112..873960
                     /locus_tag="wFol_07360"
     CDS             873112..873960
                     /locus_tag="wFol_07360"
                     /product="Site-specific recombinase, phage integrase
                     family"
                     /note="Uniprot:Q73H24"
                     /fasta_file="/home/lisa/Wolbachia_genomes/Genome_seqs/9_wol_genomes.faa:fasta/wFol13040.fasta.out"
                     /blastp_file="uniprot_all.fasta:blastp/wFol13040.out"
     gene            complement(873985..878481)
                     /locus_tag="wFol_07370"
     CDS             complement(873985..878481)
                     /locus_tag="wFol_07370"
                     /product="Collagen triple helix repeat protein"
                     /note="Uniprot:A0A176Q266"
                     /fasta_file="/home/lisa/Wolbachia_genomes/Genome_seqs/9_wol_genomes.faa:fasta/wFol13030.fasta.out"
                     /blastp_file="uniprot_all.fasta:blastp/wFol13030.out"
     gene            878658..879302
                     /locus_tag="wFol_07380"
     CDS             878658..879302
                     /locus_tag="wFol_07380"
                     /product="Phospholipase/carboxylesterase family protein"
                     /note="Uniprot:A0A178GUR6"
                     /fasta_file="/home/lisa/Wolbachia_genomes/Genome_seqs/9_wol_genomes.faa:fasta/wFol13020.fasta.out"
                     /blastp_file="uniprot_all.fasta:blastp/wFol13020.out"
     gene            879791..880579
                     /locus_tag="wFol_07390"
     CDS             879791..880579
                     /locus_tag="wFol_07390"
                     /product="NAD(P)-dependent oxidoreductase"
                     /note="Uniprot:A0A060Q197"
                     /fasta_file="/home/lisa/Wolbachia_genomes/Genome_seqs/9_wol_genomes.faa:fasta/wFol13010.fasta.out"
                     /blastp_file="uniprot_all.fasta:blastp/wFol13010.out"
     gene            880714..881556
                     /locus_tag="wFol_07400"
     CDS             880714..881556
                     /locus_tag="wFol_07400"
                     /product="Chromosome partitioning protein, ParA family"
                     /note="Uniprot:A0A178GT96"
                     /fasta_file="/home/lisa/Wolbachia_genomes/Genome_seqs/9_wol_genomes.faa:fasta/wFol13000.fasta.out"
                     /blastp_file="uniprot_all.fasta:blastp/wFol13000.out"
     gene            881553..882419
                     /locus_tag="wFol_07410"
     CDS             881553..882419
                     /locus_tag="wFol_07410"
                     /product="Chromosome partitioning protein, ParB family"
                     /note="Uniprot:Q73FV5"
                     /fasta_file="/home/lisa/Wolbachia_genomes/Genome_seqs/9_wol_genomes.faa:fasta/wFol12990.fasta.out"
                     /blastp_file="uniprot_all.fasta:blastp/wFol12990.out"
     gene            complement(882439..884184)
                     /locus_tag="wFol_07420"
     CDS             complement(882439..884184)
                     /locus_tag="wFol_07420"
                     /product="Putative membrane protein"
                     /fasta_file="/home/lisa/Wolbachia_genomes/Genome_seqs/9_wol_genomes.faa:fasta/wFol12980.fasta.out"
                     /blastp_file="uniprot_all.fasta:blastp/wFol12980.out"
     gene            complement(884681..885253)
                     /locus_tag="wFol_07430"
     CDS             complement(884681..885253)
                     /locus_tag="wFol_07430"
                     /product="Unique protein"
                     /fasta_file="/home/lisa/Wolbachia_genomes/Genome_seqs/9_wol_genomes.faa:fasta/wFol12970.fasta.out"
                     /blastp_file="uniprot_all.fasta:blastp/wFol12970.out"
     gene            885493..888048
                     /locus_tag="wFol_07440"
     CDS             885493..888048
                     /locus_tag="wFol_07440"
                     /product="DNA polymerase"
                     /note="Uniprot:M9WWK0"
                     /gene="polA"
                     /fasta_file="/home/lisa/Wolbachia_genomes/Genome_seqs/9_wol_genomes.faa:fasta/wFol12960.fasta.out"
                     /blastp_file="uniprot_all.fasta:blastp/wFol12960.out"
     gene            888299..889744
                     /locus_tag="wFol_07450"
     CDS             888299..889744
                     /locus_tag="wFol_07450"
                     /product="Alpha/beta-hydrolases superfamily protein"
                     /note="Uniprot:A0A060PZW5"
                     /fasta_file="/home/lisa/Wolbachia_genomes/Genome_seqs/9_wol_genomes.faa:fasta/wFol12950.fasta.out"
                     /blastp_file="uniprot_all.fasta:blastp/wFol12950.out"
     gene            889812..890141
                     /locus_tag="wFol_07460"
     CDS             889812..890141
                     /locus_tag="wFol_07460"
                     /product="Ribosome silencing factor during starvation
                     RsfS"
                     /note="Uniprot:A0A178GS77"
                     /gene="rsfS"
                     /fasta_file="/home/lisa/Wolbachia_genomes/Genome_seqs/9_wol_genomes.faa:fasta/wFol12940.fasta.out"
                     /blastp_file="uniprot_all.fasta:blastp/wFol12940.out"
     gene            890132..890509
                     /locus_tag="wFol_07470"
                     /note="Ubiquinol-cytochrome c reductase,cytochrome c1,
                     truncation"
                     /note="Uniprot:A0A0P6P0P3"
                     /fasta_file="/home/lisa/Wolbachia_genomes/Genome_seqs/9_wol_genomes.faa:fasta/wFol12930.fasta.out"
                     /blastp_file="uniprot_all.fasta:blastp/wFol12930.out"
                     /pseudo
     gene            890563..891849
                     /locus_tag="wFol_07480"
     CDS             890563..891849
                     /locus_tag="wFol_07480"
                     /product="Tyrosine--tRNA ligase"
                     /note="Uniprot:A0A176Q754"
                     /gene="tyrS"
                     /fasta_file="/home/lisa/Wolbachia_genomes/Genome_seqs/9_wol_genomes.faa:fasta/wFol12920.fasta.out"
                     /blastp_file="uniprot_all.fasta:blastp/wFol12920.out"
     gene            892334..893791
                     /locus_tag="wFol_07490"
     CDS             892334..893791
                     /locus_tag="wFol_07490"
                     /product="Transposase, IS4 family"
                     /note="group IS50"
                     /note="Uniprot:A0A178GTG4"
                     /fasta_file="/home/lisa/Wolbachia_genomes/Genome_seqs/9_wol_genomes.faa:fasta/wFol12910.fasta.out"
                     /blastp_file="uniprot_all.fasta:blastp/wFol12910.out"
     gene            complement(893782..894075)
                     /locus_tag="wFol_07500"
     CDS             complement(893782..894075)
                     /locus_tag="wFol_07500"
                     /product="Transposase, IS630 family, ORFB"
                     /note="no group"
                     /note="Uniprot:A0A178GWK9"
                     /fasta_file="/home/lisa/Wolbachia_genomes/Genome_seqs/9_wol_genomes.faa:fasta/wFol12900.fasta.out"
                     /blastp_file="uniprot_all.fasta:blastp/wFol12900.out"
     gene            complement(894203..894562)
                     /locus_tag="wFol_07510"
     CDS             complement(894203..894562)
                     /locus_tag="wFol_07510"
                     /product="Transposase, IS630 family, ORFA"
                     /note="no group"
                     /note="Uniprot:A0A176Q7X1"
                     /fasta_file="/home/lisa/Wolbachia_genomes/Genome_seqs/9_wol_genomes.faa:fasta/wFol12890.fasta.out"
                     /blastp_file="uniprot_all.fasta:blastp/wFol12890.out"
     gene            894761..895564
                     /locus_tag="wFol_07520"
     CDS             894761..895564
                     /locus_tag="wFol_07520"
                     /product="Transposase, IS5 family"
                     /note="group IS903"
                     /note="Uniprot:A0A098AQQ9"
                     /fasta_file="/home/lisa/Wolbachia_genomes/Genome_seqs/9_wol_genomes.faa:fasta/wFol12880.fasta.out"
                     /blastp_file="uniprot_all.fasta:blastp/wFol12880.out"
     gene            complement(895633..896334)
                     /locus_tag="wFol_07530"
     CDS             complement(895633..896334)
                     /locus_tag="wFol_07530"
                     /product="Unique protein"
                     /fasta_file="/home/lisa/Wolbachia_genomes/Genome_seqs/9_wol_genomes.faa:fasta/wFol12870.fasta.out"
                     /blastp_file="uniprot_all.fasta:blastp/wFol12870.out"
     gene            complement(896590..898683)
                     /locus_tag="wFol_07540"
     CDS             complement(896590..898683)
                     /locus_tag="wFol_07540"
                     /product="Unique protein"
                     /fasta_file="/home/lisa/Wolbachia_genomes/Genome_seqs/9_wol_genomes.faa:fasta/wFol12860.fasta.out"
                     /blastp_file="uniprot_all.fasta:blastp/wFol12860.out"
     gene            complement(898960..899886)
                     /locus_tag="wFol_07550"
     CDS             complement(898960..899886)
                     /locus_tag="wFol_07550"
                     /product="Unique protein"
                     /fasta_file="/home/lisa/Wolbachia_genomes/Genome_seqs/9_wol_genomes.faa:fasta/wFol12850.fasta.out"
                     /blastp_file="uniprot_all.fasta:blastp/wFol12850.out"
     gene            900108..900548
                     /locus_tag="wFol_07560"
     CDS             900108..900548
                     /locus_tag="wFol_07560"
                     /product="Unique protein"
                     /fasta_file="/home/lisa/Wolbachia_genomes/Genome_seqs/9_wol_genomes.faa:fasta/wFol12840.fasta.out"
                     /blastp_file="uniprot_all.fasta:blastp/wFol12840.out"
     gene            900870..901370
                     /locus_tag="wFol_07570"
     CDS             900870..901370
                     /locus_tag="wFol_07570"
                     /product="Unique protein"
                     /fasta_file="/home/lisa/Wolbachia_genomes/Genome_seqs/9_wol_genomes.faa:fasta/wFol12830.fasta.out"
                     /blastp_file="uniprot_all.fasta:blastp/wFol12830.out"
     gene            901642..902367
                     /locus_tag="wFol_07580"
     CDS             901642..902367
                     /locus_tag="wFol_07580"
                     /product="ATP synthase subunit a"
                     /note="Uniprot:A0A178GX33"
                     /gene="atpB"
                     /fasta_file="/home/lisa/Wolbachia_genomes/Genome_seqs/9_wol_genomes.faa:fasta/wFol12820.fasta.out"
                     /blastp_file="uniprot_all.fasta:blastp/wFol12820.out"
     gene            902428..902652
                     /locus_tag="wFol_07590"
     CDS             902428..902652
                     /locus_tag="wFol_07590"
                     /product="ATP synthase subunit c"
                     /note="Uniprot:M9WU40"
                     /gene="atpE"
                     /fasta_file="/home/lisa/Wolbachia_genomes/Genome_seqs/9_wol_genomes.faa:fasta/wFol12810.fasta.out"
                     /blastp_file="uniprot_all.fasta:blastp/wFol12810.out"
     gene            902654..903133
                     /locus_tag="wFol_07600"
     CDS             902654..903133
                     /locus_tag="wFol_07600"
                     /product="ATP synthase subunit b"
                     /note="Uniprot:M9WVG9"
                     /gene="atpF"
                     /fasta_file="/home/lisa/Wolbachia_genomes/Genome_seqs/9_wol_genomes.faa:fasta/wFol12800.fasta.out"
                     /blastp_file="uniprot_all.fasta:blastp/wFol12800.out"
     gene            903142..903618
                     /locus_tag="wFol_07610"
     CDS             903142..903618
                     /locus_tag="wFol_07610"
                     /product="ATP synthase subunit b"
                     /note="Uniprot:A0A178GT87"
                     /gene="atpF"
                     /fasta_file="/home/lisa/Wolbachia_genomes/Genome_seqs/9_wol_genomes.faa:fasta/wFol12790.fasta.out"
                     /blastp_file="uniprot_all.fasta:blastp/wFol12790.out"
     gene            903923..905584
                     /locus_tag="wFol_07620"
     CDS             903923..905584
                     /locus_tag="wFol_07620"
                     /product="Glycosyl transferase, group 2 family protein"
                     /note="Uniprot:C0R5T9"
                     /note="Uniprot:A0A178GST9"
                     /fasta_file="/home/lisa/Wolbachia_genomes/Genome_seqs/9_wol_genomes.faa:fasta/wFol12780.fasta.out"
                     /fasta_file="/home/lisa/Wolbachia_genomes/Genome_seqs/9_wol_genomes.faa:fasta/wFol12770.fasta.out"
                     /blastp_file="uniprot_all.fasta:blastp/wFol12780.out"
                     /blastp_file="uniprot_all.fasta:blastp/wFol12770.out"
     gene            905557..906570
                     /locus_tag="wFol_07630"
     CDS             905557..906570
                     /locus_tag="wFol_07630"
                     /product="Heme A synthase"
                     /note="Uniprot:A0A176Q887"
                     /gene="ctaA"
                     /fasta_file="/home/lisa/Wolbachia_genomes/Genome_seqs/9_wol_genomes.faa:fasta/wFol12760.fasta.out"
                     /blastp_file="uniprot_all.fasta:blastp/wFol12760.out"
     gene            906711..907676
                     /locus_tag="wFol_07640"
     CDS             906711..907676
                     /locus_tag="wFol_07640"
                     /product="Putative membrane protein"
                     /fasta_file="/home/lisa/Wolbachia_genomes/Genome_seqs/9_wol_genomes.faa:fasta/wFol12750.fasta.out"
                     /blastp_file="uniprot_all.fasta:blastp/wFol12750.out"
     gene            907793..909553
                     /locus_tag="wFol_07650"
     CDS             907793..909553
                     /locus_tag="wFol_07650"
                     /product="DNA primase"
                     /note="Uniprot:M9WUD0"
                     /note="Uniprot:A0A0P6NNE2"
                     /gene="dnaG"
                     /fasta_file="/home/lisa/Wolbachia_genomes/Genome_seqs/9_wol_genomes.faa:fasta/wFol12730.fasta.out"
                     /fasta_file="/home/lisa/Wolbachia_genomes/Genome_seqs/9_wol_genomes.faa:fasta/wFol12740.fasta.out"
                     /blastp_file="uniprot_all.fasta:blastp/wFol12730.out"
                     /blastp_file="uniprot_all.fasta:blastp/wFol12740.out"
     gene            complement(909563..909976)
                     /locus_tag="wFol_07660"
     CDS             complement(909563..909976)
                     /locus_tag="wFol_07660"
                     /product="Putative inner membrane protein"
                     /note="Uniprot:A0A178GSC0"
                     /fasta_file="/home/lisa/Wolbachia_genomes/Genome_seqs/9_wol_genomes.faa:fasta/wFol12720.fasta.out"
                     /blastp_file="uniprot_all.fasta:blastp/wFol12720.out"
     gene            complement(909983..911356)
                     /locus_tag="wFol_07670"
     CDS             complement(909983..911356)
                     /locus_tag="wFol_07670"
                     /product="Cysteine--tRNA ligase"
                     /note="Uniprot:A0A098AQL6"
                     /gene="cysS"
                     /fasta_file="/home/lisa/Wolbachia_genomes/Genome_seqs/9_wol_genomes.faa:fasta/wFol12710.fasta.out"
                     /blastp_file="uniprot_all.fasta:blastp/wFol12710.out"
     gene            complement(911349..911996)
                     /locus_tag="wFol_07680"
     CDS             complement(911349..911996)
                     /locus_tag="wFol_07680"
                     /product="Exopolysaccharide synthesis protein ExoD-related
                     protein"
                     /note="Uniprot:Q73IL0"
                     /fasta_file="/home/lisa/Wolbachia_genomes/Genome_seqs/9_wol_genomes.faa:fasta/wFol12700.fasta.out"
                     /blastp_file="uniprot_all.fasta:blastp/wFol12700.out"
     gene            912589..914214
                     /locus_tag="wFol_07690"
     CDS             912589..914214
                     /locus_tag="wFol_07690"
                     /product="Uncharacterized protein"
                     /note="Uniprot:C0F9F7"
                     /fasta_file="/home/lisa/Wolbachia_genomes/Genome_seqs/9_wol_genomes.faa:fasta/wFol12680.fasta.out"
                     /blastp_file="uniprot_all.fasta:blastp/wFol12680.out"
     gene            complement(914256..916241)
                     /locus_tag="wFol_07700"
     CDS             complement(914256..916241)
                     /locus_tag="wFol_07700"
                     /product="Unique protein"
                     /fasta_file="/home/lisa/Wolbachia_genomes/Genome_seqs/9_wol_genomes.faa:fasta/wFol12660.fasta.out"
                     /fasta_file="/home/lisa/Wolbachia_genomes/Genome_seqs/9_wol_genomes.faa:fasta/wFol12670.fasta.out"
                     /blastp_file="uniprot_all.fasta:blastp/wFol12660.out"
                     /blastp_file="uniprot_all.fasta:blastp/wFol12670.out"
     gene            916388..917386
                     /locus_tag="wFol_07710"
     CDS             916388..917386
                     /locus_tag="wFol_07710"
                     /product="Pyruvate dehydrogenase complex, E1 component,
                     pyruvate dehydrogenase beta subunit"
                     /note="Uniprot:C0R5S0"
                     /fasta_file="/home/lisa/Wolbachia_genomes/Genome_seqs/9_wol_genomes.faa:fasta/wFol12650.fasta.out"
                     /blastp_file="uniprot_all.fasta:blastp/wFol12650.out"
     gene            917533..918573
                     /locus_tag="wFol_07720"
     CDS             917533..918573
                     /locus_tag="wFol_07720"
                     /product="Unique protein"
                     /fasta_file="/home/lisa/Wolbachia_genomes/Genome_seqs/9_wol_genomes.faa:fasta/wFol12640.fasta.out"
                     /blastp_file="uniprot_all.fasta:blastp/wFol12640.out"
     gene            complement(918622..920115)
                     /locus_tag="wFol_07730"
     CDS             complement(918622..920115)
                     /locus_tag="wFol_07730"
                     /product="Inosine-5'-monophosphate dehydrogenase"
                     /note="Uniprot:A0A176Q8I7"
                     /gene="guaB"
                     /fasta_file="/home/lisa/Wolbachia_genomes/Genome_seqs/9_wol_genomes.faa:fasta/wFol12630.fasta.out"
                     /blastp_file="uniprot_all.fasta:blastp/wFol12630.out"
     gene            complement(920348..920998)
                     /locus_tag="wFol_07740"
     CDS             complement(920348..920998)
                     /locus_tag="wFol_07740"
                     /product="Putative dioxygenase"
                     /note="Uniprot:M9WT84"
                     /fasta_file="/home/lisa/Wolbachia_genomes/Genome_seqs/9_wol_genomes.faa:fasta/wFol12620.fasta.out"
                     /blastp_file="uniprot_all.fasta:blastp/wFol12620.out"
     tRNA            complement(921114..921186)
                     /ID="tRNA:Lys"
                     /Codon="CTT"
                     /score=76.97
                     /Name="tRNA:Lys"
                     /AminoAcid="Lys"
     gene            complement(921195..922376)
                     /locus_tag="wFol_07750"
     CDS             complement(921195..922376)
                     /locus_tag="wFol_07750"
                     /product="Dihydrolipoyllysine-residue succinyltransferase
                     component of 2-oxoglutarate dehydrogenase complex"
                     /note="Uniprot:A0A178GUW6"
                     /gene="sucB"
                     /fasta_file="/home/lisa/Wolbachia_genomes/Genome_seqs/9_wol_genomes.faa:fasta/wFol12610.fasta.out"
                     /blastp_file="uniprot_all.fasta:blastp/wFol12610.out"
     gene            complement(922551..924263)
                     /locus_tag="wFol_07760"
     CDS             complement(922551..924263)
                     /locus_tag="wFol_07760"
                     /product="Putative membrane protein"
                     /note="Uniprot:C0R2X0"
                     /fasta_file="/home/lisa/Wolbachia_genomes/Genome_seqs/9_wol_genomes.faa:fasta/wFol12600.fasta.out"
                     /blastp_file="uniprot_all.fasta:blastp/wFol12600.out"
     gene            924573..925775
                     /locus_tag="wFol_07770"
     CDS             924573..925775
                     /locus_tag="wFol_07770"
                     /product="Phosphoglycerate kinase"
                     /note="Uniprot:A0A176Q7N1"
                     /gene="pgk"
                     /fasta_file="/home/lisa/Wolbachia_genomes/Genome_seqs/9_wol_genomes.faa:fasta/wFol12590.fasta.out"
                     /blastp_file="uniprot_all.fasta:blastp/wFol12590.out"
     gene            925833..926666
                     /locus_tag="wFol_07780"
     CDS             925833..926666
                     /locus_tag="wFol_07780"
                     /product="Endoribonuclease XendoU family protein"
                     /note="Uniprot:M9WRJ7"
                     /fasta_file="/home/lisa/Wolbachia_genomes/Genome_seqs/9_wol_genomes.faa:fasta/wFol12580.fasta.out"
                     /blastp_file="uniprot_all.fasta:blastp/wFol12580.out"
     gene            926812..928269
                     /locus_tag="wFol_07790"
     CDS             926812..928269
                     /locus_tag="wFol_07790"
                     /product="Transposase, IS4 family"
                     /note="group IS50"
                     /note="Uniprot:A0A178GTG4"
                     /fasta_file="/home/lisa/Wolbachia_genomes/Genome_seqs/9_wol_genomes.faa:fasta/wFol12570.fasta.out"
                     /blastp_file="uniprot_all.fasta:blastp/wFol12570.out"
     gene            928295..930838
                     /locus_tag="wFol_07800"
     CDS             928295..930838
                     /locus_tag="wFol_07800"
                     /product="Ankyrin repeat domain protein"
                     /note="Uniprot:A0A178GVB8"
                     /fasta_file="/home/lisa/Wolbachia_genomes/Genome_seqs/9_wol_genomes.faa:fasta/wFol12560.fasta.out"
                     /blastp_file="uniprot_all.fasta:blastp/wFol12560.out"
     gene            complement(930860..933781)
                     /locus_tag="wFol_07810"
     CDS             complement(930860..933781)
                     /locus_tag="wFol_07810"
                     /product="PD-(D/E)XK nuclease superfamily protein"
                     /note="Uniprot:A0A097GWC2"
                     /fasta_file="/home/lisa/Wolbachia_genomes/Genome_seqs/9_wol_genomes.faa:fasta/wFol12550.fasta.out"
                     /blastp_file="uniprot_all.fasta:blastp/wFol12550.out"
     gene            complement(933896..937165)
                     /locus_tag="wFol_07820"
     CDS             complement(933896..937165)
                     /locus_tag="wFol_07820"
                     /product="Ankyrin repeat domain protein"
                     /fasta_file="/home/lisa/Wolbachia_genomes/Genome_seqs/9_wol_genomes.faa:fasta/wFol12540.fasta.out"
                     /blastp_file="uniprot_all.fasta:blastp/wFol12540.out"
     gene            937380..937883
                     /locus_tag="wFol_07830"
     CDS             937380..937883
                     /locus_tag="wFol_07830"
                     /product="Uncharacterized protein"
                     /note="Uniprot:B3CN90"
                     /fasta_file="/home/lisa/Wolbachia_genomes/Genome_seqs/9_wol_genomes.faa:fasta/wFol12530.fasta.out"
                     /blastp_file="uniprot_all.fasta:blastp/wFol12530.out"
     gene            complement(938104..939075)
                     /locus_tag="wFol_07840"
     CDS             complement(938104..939075)
                     /locus_tag="wFol_07840"
                     /product="Transposase, IS481 family"
                     /note="no group"
                     /note="Uniprot:A0A0D7PAZ1"
                     /fasta_file="/home/lisa/Wolbachia_genomes/Genome_seqs/9_wol_genomes.faa:fasta/wFol12520.fasta.out"
                     /blastp_file="uniprot_all.fasta:blastp/wFol12520.out"
     gene            939316..939849
                     /locus_tag="wFol_07850"
     CDS             939316..939849
                     /locus_tag="wFol_07850"
                     /product="Phage prohead protease"
                     /note="Uniprot:H0U200"
                     /fasta_file="/home/lisa/Wolbachia_genomes/Genome_seqs/9_wol_genomes.faa:fasta/wFol12510.fasta.out"
                     /blastp_file="uniprot_all.fasta:blastp/wFol12510.out"
     gene            940073..944182
                     /locus_tag="wFol_07860"
     CDS             940073..944182
                     /locus_tag="wFol_07860"
                     /product="Putative helicase, superfamily 1/2"
                     /fasta_file="/home/lisa/Wolbachia_genomes/Genome_seqs/9_wol_genomes.faa:fasta/wFol12500.fasta.out"
                     /blastp_file="uniprot_all.fasta:blastp/wFol12500.out"
     gene            complement(944191..945552)
                     /locus_tag="wFol_07870"
     CDS             complement(944191..945552)
                     /locus_tag="wFol_07870"
                     /product="Poly A polymerase family protein"
                     /note="Uniprot:Q73HU6"
                     /fasta_file="/home/lisa/Wolbachia_genomes/Genome_seqs/9_wol_genomes.faa:fasta/wFol12490.fasta.out"
                     /blastp_file="uniprot_all.fasta:blastp/wFol12490.out"
     gene            complement(945639..946328)
                     /locus_tag="wFol_07880"
                     /note="Uncharacterized protein, truncation"
                     /note="Uniprot:A0A060Q528"
                     /fasta_file="/home/lisa/Wolbachia_genomes/Genome_seqs/9_wol_genomes.faa:fasta/wFol12480.fasta.out"
                     /blastp_file="uniprot_all.fasta:blastp/wFol12480.out"
                     /pseudo
     gene            complement(946651..952035)
                     /locus_tag="wFol_07890"
     CDS             complement(946651..952035)
                     /locus_tag="wFol_07890"
                     /product="Unique protein"
                     /fasta_file="/home/lisa/Wolbachia_genomes/Genome_seqs/9_wol_genomes.faa:fasta/wFol12470.fasta.out"
                     /blastp_file="uniprot_all.fasta:blastp/wFol12470.out"
     gene            952494..953618
                     /locus_tag="wFol_07900"
     CDS             952494..953618
                     /locus_tag="wFol_07900"
                     /product="Transposase, IS4 family"
                     /note="group IS4Sa"
                     /note="Uniprot:A0A0P6NQA5"
                     /fasta_file="/home/lisa/Wolbachia_genomes/Genome_seqs/9_wol_genomes.faa:fasta/wFol12460.fasta.out"
                     /blastp_file="uniprot_all.fasta:blastp/wFol12460.out"
     gene            complement(953884..954807)
                     /locus_tag="wFol_07910"
     CDS             complement(953884..954807)
                     /locus_tag="wFol_07910"
                     /product="Fructose-1,6-bisphosphatase"
                     /note="Uniprot:A0A060PY19"
                     /gene="glpX"
                     /fasta_file="/home/lisa/Wolbachia_genomes/Genome_seqs/9_wol_genomes.faa:fasta/wFol12440.fasta.out"
                     /blastp_file="uniprot_all.fasta:blastp/wFol12440.out"
     gene            954930..955994
                     /locus_tag="wFol_07920"
     CDS             954930..955994
                     /locus_tag="wFol_07920"
                     /product="Ankyrin repeat domain protein"
                     /note="Uniprot:Q4E8G8"
                     /fasta_file="/home/lisa/Wolbachia_genomes/Genome_seqs/9_wol_genomes.faa:fasta/wFol12430.fasta.out"
                     /blastp_file="uniprot_all.fasta:blastp/wFol12430.out"
     gene            complement(956001..956498)
                     /locus_tag="wFol_07930"
     CDS             complement(956001..956498)
                     /locus_tag="wFol_07930"
                     /product="Putative membrane protein"
                     /note="Uniprot:A0A060PYB4"
                     /fasta_file="/home/lisa/Wolbachia_genomes/Genome_seqs/9_wol_genomes.faa:fasta/wFol12420.fasta.out"
                     /blastp_file="uniprot_all.fasta:blastp/wFol12420.out"
     gene            complement(956491..957384)
                     /locus_tag="wFol_07940"
     CDS             complement(956491..957384)
                     /locus_tag="wFol_07940"
                     /product="Heat shock sigma factor RpoH"
                     /note="Uniprot:A0A178GUD2"
                     /gene="rpoH"
                     /fasta_file="/home/lisa/Wolbachia_genomes/Genome_seqs/9_wol_genomes.faa:fasta/wFol12410.fasta.out"
                     /blastp_file="uniprot_all.fasta:blastp/wFol12410.out"
     gene            complement(957848..958300)
                     /locus_tag="wFol_07950"
     CDS             complement(957848..958300)
                     /locus_tag="wFol_07950"
                     /product="Putative membrane protein"
                     /fasta_file="/home/lisa/Wolbachia_genomes/Genome_seqs/9_wol_genomes.faa:fasta/wFol12400.fasta.out"
                     /blastp_file="uniprot_all.fasta:blastp/wFol12400.out"
     gene            complement(958312..958821)
                     /locus_tag="wFol_07960"
     CDS             complement(958312..958821)
                     /locus_tag="wFol_07960"
                     /product="Surface antigen-related protein"
                     /note="Uniprot:A0A178GSA2"
                     /fasta_file="/home/lisa/Wolbachia_genomes/Genome_seqs/9_wol_genomes.faa:fasta/wFol12390.fasta.out"
                     /blastp_file="uniprot_all.fasta:blastp/wFol12390.out"
     gene            complement(958998..960230)
                     /locus_tag="wFol_07970"
     CDS             complement(958998..960230)
                     /locus_tag="wFol_07970"
                     /product="Ankyrin repeat domain protein"
                     /fasta_file="/home/lisa/Wolbachia_genomes/Genome_seqs/9_wol_genomes.faa:fasta/wFol12380.fasta.out"
                     /blastp_file="uniprot_all.fasta:blastp/wFol12380.out"
     gene            complement(960287..961492)
                     /locus_tag="wFol_07980"
     CDS             complement(960287..961492)
                     /locus_tag="wFol_07980"
                     /product="Ankyrin repeat domain protein"
                     /fasta_file="/home/lisa/Wolbachia_genomes/Genome_seqs/9_wol_genomes.faa:fasta/wFol12370.fasta.out"
                     /blastp_file="uniprot_all.fasta:blastp/wFol12370.out"
     gene            complement(961573..962667)
                     /locus_tag="wFol_07990"
     CDS             complement(961573..962667)
                     /locus_tag="wFol_07990"
                     /product="Ribosome-binding ATPase YchF"
                     /note="Uniprot:A0A178GTK6"
                     /gene="ychF"
                     /fasta_file="/home/lisa/Wolbachia_genomes/Genome_seqs/9_wol_genomes.faa:fasta/wFol12360.fasta.out"
                     /blastp_file="uniprot_all.fasta:blastp/wFol12360.out"
     gene            962812..963861
                     /locus_tag="wFol_08000"
     CDS             962812..963861
                     /locus_tag="wFol_08000"
                     /product="Putative OTU-like cysteine proteases"
                     /note="Uniprot:M9WYZ7"
                     /fasta_file="/home/lisa/Wolbachia_genomes/Genome_seqs/9_wol_genomes.faa:fasta/wFol12350.fasta.out"
                     /blastp_file="uniprot_all.fasta:blastp/wFol12350.out"
     gene            964020..964526
                     /locus_tag="wFol_08010"
     CDS             964020..964526
                     /locus_tag="wFol_08010"
                     /product="Uncharacterized protein"
                     /note="Uniprot:A0A178GTU4"
                     /fasta_file="/home/lisa/Wolbachia_genomes/Genome_seqs/9_wol_genomes.faa:fasta/wFol12340.fasta.out"
                     /blastp_file="uniprot_all.fasta:blastp/wFol12340.out"
     gene            complement(964504..965463)
                     /locus_tag="wFol_08020"
     CDS             complement(964504..965463)
                     /locus_tag="wFol_08020"
                     /product="Transposase, IS5 family"
                     /note="group IS903"
                     /note="Uniprot:A0A098AQT6"
                     /fasta_file="/home/lisa/Wolbachia_genomes/Genome_seqs/9_wol_genomes.faa:fasta/wFol12330.fasta.out"
                     /blastp_file="uniprot_all.fasta:blastp/wFol12330.out"
     gene            965797..966162
                     /locus_tag="wFol_08030"
     CDS             965797..966162
                     /locus_tag="wFol_08030"
                     /product="Putative membrane protein"
                     /fasta_file="/home/lisa/Wolbachia_genomes/Genome_seqs/9_wol_genomes.faa:fasta/wFol12320.fasta.out"
                     /blastp_file="uniprot_all.fasta:blastp/wFol12320.out"
     gene            complement(966194..966388)
                     /locus_tag="wFol_08040"
     CDS             complement(966194..966388)
                     /locus_tag="wFol_08040"
                     /product="Iron-sulphur cluster assembly protein"
                     /note="Uniprot:M9WVM7"
                     /fasta_file="/home/lisa/Wolbachia_genomes/Genome_seqs/9_wol_genomes.faa:fasta/wFol12310.fasta.out"
                     /blastp_file="uniprot_all.fasta:blastp/wFol12310.out"
     tRNA            complement(966420..966506)
                     /ID="tRNA:Leu-3"
                     /Codon="TAA"
                     /score=72.59
                     /Name="tRNA:Leu-3"
                     /AminoAcid="Leu-3"
     gene            complement(966516..967130)
                     /locus_tag="wFol_08050"
     CDS             complement(966516..967130)
                     /locus_tag="wFol_08050"
                     /product="30S ribosomal protein S4"
                     /note="Uniprot:A0A0P6NNF5"
                     /gene="rpsD"
                     /fasta_file="/home/lisa/Wolbachia_genomes/Genome_seqs/9_wol_genomes.faa:fasta/wFol12300.fasta.out"
                     /blastp_file="uniprot_all.fasta:blastp/wFol12300.out"
     gene            967245..969239
                     /locus_tag="wFol_08060"
     CDS             967245..969239
                     /locus_tag="wFol_08060"
                     /product="Transketolase"
                     /note="Uniprot:M9WRY3"
                     /gene="tkt"
                     /fasta_file="/home/lisa/Wolbachia_genomes/Genome_seqs/9_wol_genomes.faa:fasta/wFol12290.fasta.out"
                     /blastp_file="uniprot_all.fasta:blastp/wFol12290.out"
     gene            complement(969211..969990)
                     /locus_tag="wFol_08070"
     CDS             complement(969211..969990)
                     /locus_tag="wFol_08070"
                     /product="Methionine aminopeptidase"
                     /note="Uniprot:A0A060PX80"
                     /gene="map"
                     /fasta_file="/home/lisa/Wolbachia_genomes/Genome_seqs/9_wol_genomes.faa:fasta/wFol12280.fasta.out"
                     /blastp_file="uniprot_all.fasta:blastp/wFol12280.out"
     gene            complement(970154..972487)
                     /locus_tag="wFol_08080"
     CDS             complement(970154..972487)
                     /locus_tag="wFol_08080"
                     /product="Unique protein"
                     /fasta_file="/home/lisa/Wolbachia_genomes/Genome_seqs/9_wol_genomes.faa:fasta/wFol12270.fasta.out"
                     /blastp_file="uniprot_all.fasta:blastp/wFol12270.out"
     gene            complement(972613..973851)
                     /locus_tag="wFol_08090"
     CDS             complement(972613..973851)
                     /locus_tag="wFol_08090"
[truncated: 2,638,557 more chars]
